# Supplementary material for: Pd/Cu-Catalyzed amide-enabled selectivity-reversed borocarbonylation of unactivated alkenes
Source: Royal Society of Chemistry journal article supplement (doi:10.1039/d1sc02785a), 2021-01-01

## Supporting Information

### Pd/Cu-Catalyzed Amide-Enabled Selectivity-Reversed Borocarbonylation of Unactivated Alkenes

Fu-Peng Wu and Xiao-Feng Wu\*

Leibniz-Institut für Katalyse e.V. an der Universität Rostock, Albert-Einstein-Straße 29a, 18059 Rostock, Germany; Dalian National Laboratory for Clean Energy, Dalian Institute of Chemical Physics, Chinese Academy of Sciences, 116023, Dalian, Liaoning, China

\* E-mail: xiao-feng.wu@catalysis.de

#### Table of Contents

|                                                                                 |     |
|---------------------------------------------------------------------------------|-----|
| <b>1. General Information</b> .....                                             | S2  |
| <b>2. Optimization of Reaction Conditions</b> .....                             | S3  |
| <b>3. General Procedure for Preparing Alkene.</b> .....                         | S9  |
| <b>4. General Procedure for Borocarbonylation of alkenes.</b> .....             | S16 |
| <b>5. Spectroscopic Data of Products</b> .....                                  | S16 |
| <b>6. Derivatization of <math>\beta</math>-Boryl ketones</b> .....              | S28 |
| <b>7. References</b> .....                                                      | S30 |
| <b>8. NMR Spectra of the Alkenes and <math>\beta</math>-boryl ketones</b> ..... | S31 |

## 1. General Information

### Reagents, solvents, and analytical methods:

Unless otherwise noted, all reactions were carried out under a carbon monoxide or nitrogen atmosphere. Alkenes were synthesized according to existing method. The reagents were ordered from Sigma-Aldrich, TCI, ABCR, and Acros, and used without purification. All solvents were dried by standard techniques and distilled prior to use. Column chromatography was performed on silica gel (200-300 meshes) using *N*-pentane (bp. 36.1 °C), dichloromethane and ethyl acetate as eluent. All NMR spectra were recorded at ambient temperature using Bruker Avance III HD 300 NMR ( $^1\text{H}$ , 300 MHz;  $^{13}\text{C}\{^1\text{H}\}$ , 75 MHz;  $^{11}\text{B}$ , 96 MHz), Bruker ARX 400 NMR spectrometers ( $^1\text{H}$ , 400 MHz;  $^{13}\text{C}\{^1\text{H}\}$ , 101 MHz,  $^{11}\text{B}$  128 MHz).  $^1\text{H}$  NMR chemical shifts are reported relative to TMS and were referenced via residual proton resonances of the corresponding deuterated solvent ( $\text{CDCl}_3$ : 7.26 ppm) whereas  $^{13}\text{C}\{^1\text{H}\}$  NMR spectra are reported relative to TMS via the carbon signals of the deuterated solvent ( $\text{CDCl}_3$ : 77.0 ppm,). Data for  $^1\text{H}$  are reported as follows: chemical shift ( $\delta$  ppm), multiplicity (s = singlet, d = doublet, t = triplet, q = quartet, quint = quintet, m = multiplet, br = broad), coupling constant (Hz), and integration. All  $^{13}\text{C}$  NMR spectra were broad-band  $^1\text{H}$  decoupled. However, signals for the carbon attach to boron, C(alkyl)-B, are usually too broad to observe in the  $^{13}\text{C}\{^1\text{H}\}$  NMR spectra. Coupling constants are reported to 0.5 or 1 Hz accuracy. Gas chromatography (GC) analyses were performed on an Agilent HP-7890A instrument with an FID detector and HP-5 capillary column (polydimethylsiloxane with 5% phenyl groups, 30 m, 0.32 mm i.d. 0.25  $\mu\text{m}$  film thickness) using argon as carrier gas. High resolution mass spectra (HRMS) were recorded on an Agilent 6210 system.

Because of the high toxicity of carbon monoxide, all the reactions should be performed in an autoclave. The laboratory should be well-equipped with a CO detector and alarm system.

## 2. Optimization of Reaction Conditions

**Table S1. Optimization of solvent.**

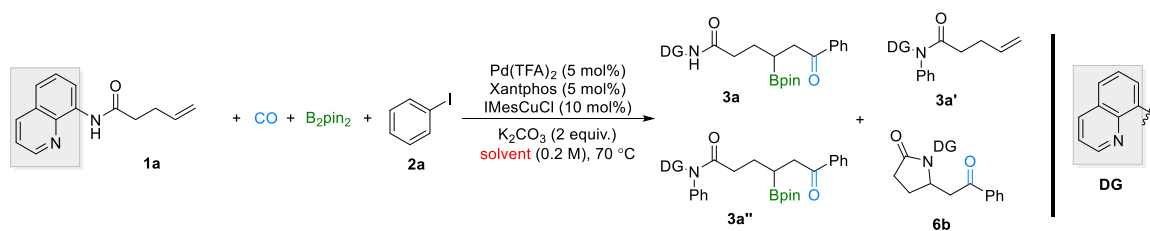

| Entry    | solvent                      | 3a (%)    | 3a' (%)  | 3a'' (%) | 6b (%)   |
|----------|------------------------------|-----------|----------|----------|----------|
| 1        | Toluene                      | 17        | 30       | 6        | 0        |
| 2        | CH <sub>3</sub> CN           | 11        | 9        | 0        | 0        |
| 3        | THF                          | 13        | 26       | 3        | 0        |
| 4        | 1,4-dioxane                  | 17        | 30       | 9        | 0        |
| <b>5</b> | <b>DMSO</b>                  | <b>29</b> | <b>8</b> | <b>0</b> | <b>8</b> |
| 6        | DCM                          | 29        | 18       | 9        | 0        |
| 7        | DCE                          | 29        | 19       | 10       | 0        |
| 8        | CHCl <sub>3</sub>            | 24        | 14       | 18       | 0        |
| 9        | PhCl                         | 20        | 28       | 9        | 0        |
| 10       | DCE/CH <sub>3</sub> CN (4:1) | 29        | 20       | 7        | 0        |
| 11       | <sup>t</sup> AmylOH          | -         | -        | -        | -        |
| 12       | HFIP                         | -         | -        | -        | -        |

Reaction conditions: *N*-(quinolin-8-yl)pent-4-enamide (0.1 mmol), iodobenzene (2.0 equiv.), B<sub>2</sub>pin<sub>2</sub> (1.5 equiv.), Pd(TFA)<sub>2</sub> (5 mol%), Xantphos (5 mol%), IMesCuCl (10 mol%), K<sub>2</sub>CO<sub>3</sub> (2 equiv.), CO (10 bar), solvent (0.2 M), 70 °C, 18 h. Yields were determined by <sup>1</sup>H NMR analysis of the crude reaction mixture using 1,3,5-trimethoxybenzene as internal standard. N.R. = No reaction.

**Table S2. Optimization of palladium source.**

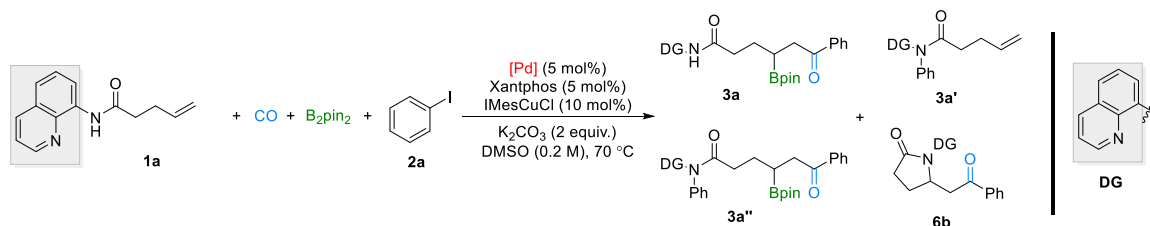

| Entry | [Pd]                 | 3a (%) | 3a' (%) | 3a'' (%) | 6b (%) |
|-------|----------------------|--------|---------|----------|--------|
| 1     | Pd(TFA) <sub>2</sub> | 29     | 8       | 0        | 8      |
| 2     | Pd(OAc) <sub>2</sub> | 34     | 8       | 0        | 0      |

|   |                                                                    |    |    |   |    |
|---|--------------------------------------------------------------------|----|----|---|----|
| 3 | PdCl <sub>2</sub>                                                  | 26 | 8  | 0 | 8  |
| 4 | Pd <sub>2</sub> dba <sub>3</sub> (2.5)                             | 25 | 8  | 0 | 10 |
| 5 | [Pd( $\eta$ -C <sub>3</sub> H <sub>5</sub> )Cl] <sub>2</sub> (2.5) | 41 | 14 | 0 | 4  |
| 6 | [Pd(cinnamyl)Cl] <sub>2</sub> (2.5)                                | 36 | 14 | 0 | 7  |
| 7 | Pd(PPh <sub>3</sub> ) <sub>4</sub>                                 | 24 | 8  | 0 | 10 |

Reaction conditions: *N*-(quinolin-8-yl)pent-4-enamide (0.1 mmol), iodobenzene (2.0 equiv.), B<sub>2</sub>pin<sub>2</sub> (1.5 equiv.), [Pd] (5 mol%), Xantphos (5 mol%), IMesCuCl (10 mol%), K<sub>2</sub>CO<sub>3</sub> (2 equiv.), CO (10 bar), DMSO (0.2 M), 70 °C, 18 h. Yields were determined by <sup>1</sup>H NMR analysis of the crude reaction mixture using 1,3,5-trimethoxybenzene as internal standard.

**Table S3. Optimization of copper source.**

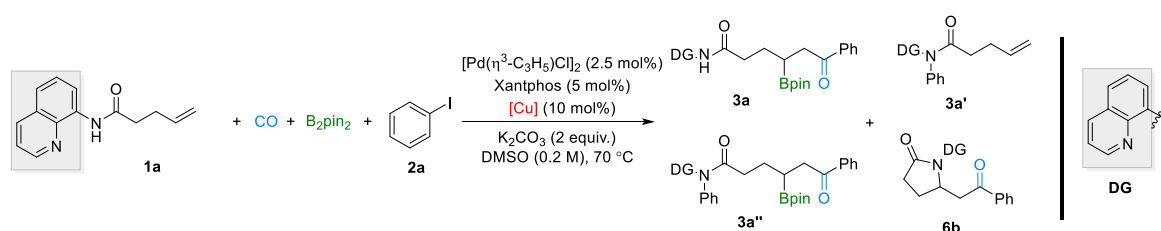

| Entry | [Cu]                                                | 3a (%) | 3a' (%) | 3a'' (%) | 6b (%) |
|-------|-----------------------------------------------------|--------|---------|----------|--------|
| 1     | IMesCuCl                                            | 41     | 14      | 0        | 4      |
| 2     | IPrCuCl                                             | -      | -       | -        | -      |
| 3     | CuCl                                                | 33     | 6       | 0        | 14     |
| 4     | CuBr                                                | 41     | 12      | 0        | 6      |
| 5     | CuI                                                 | 50     | 12      | 0        | 11     |
| 6     | Cu(OTf) <sub>2</sub>                                | 20     | 10      | 0        | 21     |
| 7     | CuCl <sub>2</sub>                                   | 16     | 6       | 0        | 5      |
| 8     | Cu(CH <sub>3</sub> CN <sub>4</sub> )BF <sub>4</sub> | 42     | 12      | 0        | 13     |
| 9     | CuBr•SMe <sub>2</sub>                               | -      | -       | -        | -      |

Reaction conditions: *N*-(quinolin-8-yl)pent-4-enamide (0.1 mmol), iodobenzene (2.0 equiv.), B<sub>2</sub>pin<sub>2</sub> (1.5 equiv.), [Pd( $\eta$ <sup>3</sup>-C<sub>3</sub>H<sub>5</sub>)Cl]<sub>2</sub> (2.5 mol%), Xantphos (5 mol%), [Cu] (10 mol%), K<sub>2</sub>CO<sub>3</sub> (2 equiv.), CO (10 bar), DMSO (0.2 M), 70 °C, 18 h. Yields were determined by <sup>1</sup>H NMR analysis of the crude reaction mixture using 1,3,5-trimethoxybenzene as internal standard. N.R. = No reaction.



**Table S5. Optimization of base.**

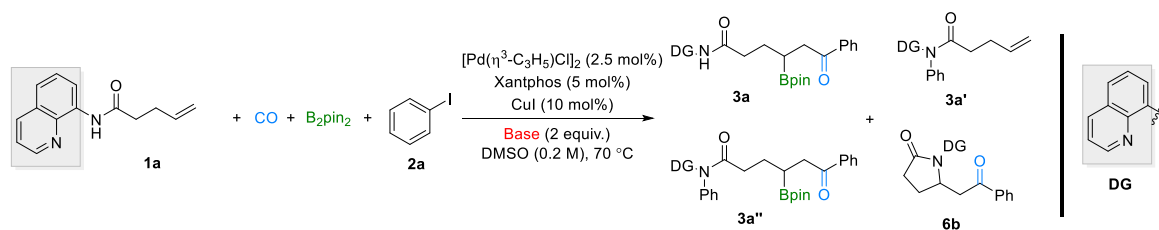

| Entry | Base                            | <b>3a</b> (%) | <b>3a'</b> (%) | <b>3a''</b> (%) | <b>6b</b> (%) |
|-------|---------------------------------|---------------|----------------|-----------------|---------------|
| 1     | K <sub>2</sub> CO <sub>3</sub>  | 50            | 12             | 0               | 11            |
| 2     | <b>KHCO<sub>3</sub></b>         | <b>58</b>     | <b>14</b>      | <b>0</b>        | <b>13</b>     |
| 3     | Na <sub>2</sub> CO <sub>3</sub> | -             | -              | -               | -             |
| 4     | NaHCO <sub>3</sub>              | -             | -              | -               | -             |
| 5     | K <sub>3</sub> PO <sub>4</sub>  | -             | -              | -               | -             |
| 6     | K <sub>2</sub> HPO <sub>4</sub> | 26            | 12             | 0               | 0             |
| 7     | KH <sub>2</sub> PO <sub>4</sub> | -             | -              | -               | -             |
| 8     | Et <sub>3</sub> N               | -             | -              | -               | -             |
| 9     | NaO <sup>t</sup> Bu             | 11            | 22             | 2               | 0             |
| 10    | LiOMe                           | -             | -              | -               | -             |
| 11    | NaOEt                           | 11            | 16             | 0               | 0             |
| 12    | LiO <sup>t</sup> Bu             | -             | -              | -               | -             |
| 13    | KF                              | -             | -              | -               | -             |
| 14    | KOAc                            | -             | -              | -               | -             |

Reaction conditions: *N*-(quinolin-8-yl)pent-4-enamide (0.1 mmol), iodobenzene (2.0 equiv.), B<sub>2</sub>pin<sub>2</sub> (1.5 equiv.), [Pd(η<sup>3</sup>-C<sub>3</sub>H<sub>5</sub>)Cl]<sub>2</sub> (2.5 mol%), Xantphos (5 mol%), CuI (10 mol%), Base (2 equiv.), CO (10 bar), DMSO (0.2 M), 70 °C, 18 h. Yields were determined by <sup>1</sup>H NMR analysis of the crude reaction mixture using 1,3,5-trimethoxybenzene as internal standard.

**Table S6. Optimization of amount of B<sub>2</sub>pin<sub>2</sub>, iodobenzene and base.**

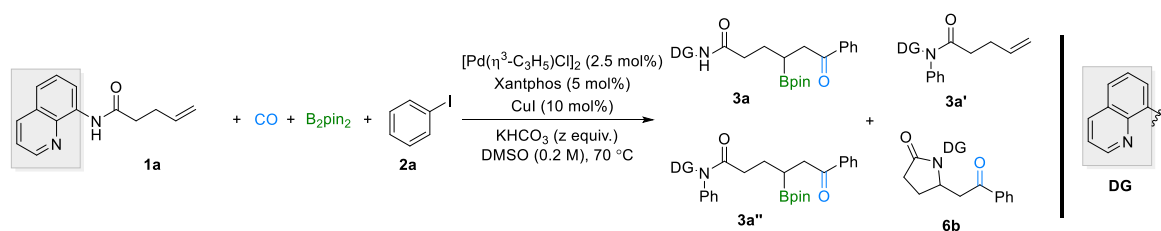

| Entry | B <sub>2</sub> pin <sub>2</sub> | 2a  | KHCO <sub>3</sub> | 3a (%) | 3a' (%) | 3a'' (%) | 6b (%) |
|-------|---------------------------------|-----|-------------------|--------|---------|----------|--------|
| 1     | 1.5                             | 2.0 | 1.5               | 41     | 12      | 0        | 10     |
| 2     | 1.5                             | 2.0 | 2.0               | 58     | 14      | 0        | 13     |
| 3     | 1.5                             | 2.0 | 2.5               | 49     | 18      | 0        | 5      |
| 4     | 1.5                             | 2.0 | 3.0               | 50     | 20      | 0        | 8      |
| 5     | 1.5                             | 1.5 | 2.0               | 45     | 16      | 0        | 6      |
| 6     | 1.5                             | 1.7 | 2.0               | 49     | 16      | 0        | 6      |
| 7     | 1.5                             | 2.0 | 2.0               | 58     | 14      | 0        | 13     |
| 8     | 1.5                             | 2.5 | 2.0               | 51     | 14      | 0        | 10     |
| 9     | 1.5                             | 3.0 | 2.0               | 34     | 16      | 9        | 10     |
| 10    | 1.3                             | 2.0 | 2.0               | 43     | 14      | 0        | 14     |
| 11    | 1.5                             | 2.0 | 2.0               | 58     | 14      | 0        | 13     |
| 12    | 1.7                             | 2.0 | 2.0               | 49     | 14      | 0        | 5      |
| 13    | 2.0                             | 2.0 | 2.0               | 47     | 16      | 0        | 2      |

Reaction conditions: *N*-(quinolin-8-yl)pent-4-enamide (0.1 mmol), iodobenzene (x equiv.), B<sub>2</sub>pin<sub>2</sub> (y equiv.), [Pd(η<sup>3</sup>-C<sub>3</sub>H<sub>5</sub>)Cl]<sub>2</sub> (2.5 mol%), Xantphos (5 mol%), CuI (10 mol%), KHCO<sub>3</sub> (z equiv.), CO (10 bar), DMSO (0.4 M), 70 °C, 18 h. Yields were determined by <sup>1</sup>H NMR analysis of the crude reaction mixture using 1,3,5-trimethoxybenzene as internal standard.

**Table S7. Optimization of concentration.**

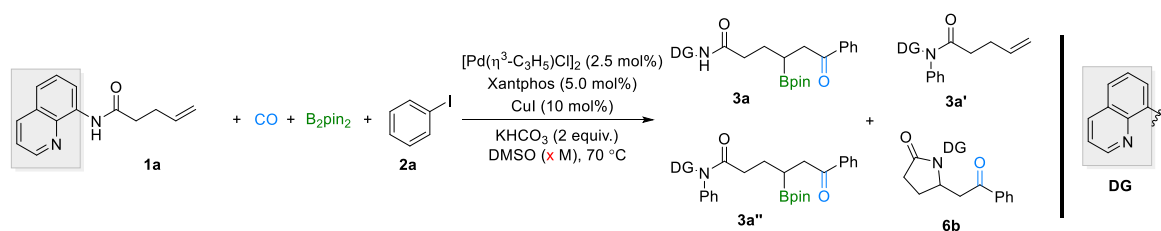

| Entry | DMSO (x M) | <b>3a</b> (%) | <b>3a'</b> (%) | <b>3a''</b> (%) | <b>6b</b> (%) |
|-------|------------|---------------|----------------|-----------------|---------------|
| 1     | 0.4 M      | 43            | 14             | 0               | 2             |
| 2     | 0.2 M      | 58            | 14             | 0               | 13            |
| 3     | 0.1 M      | 40            | 12             | 0               | 24            |

Reaction conditions: *N*-(quinolin-8-yl)pent-4-enamide (0.1 mmol), iodobenzene (2.0 equiv.), B<sub>2</sub>pin<sub>2</sub> (1.5 equiv.), [Pd(η<sup>3</sup>-C<sub>3</sub>H<sub>5</sub>)Cl]<sub>2</sub> (2.5 mol%), Xantphos (5.0 mol%), CuI (10 mol%), KHCO<sub>3</sub> (2 equiv.), CO (10 bar), DMSO (0.2 M), 70 °C, 18 h. Yields were determined by <sup>1</sup>H NMR analysis of the crude reaction mixture using 1,3,5-trimethoxybenzene as internal standard.

**Table S8. Optimization of catalyst and ligand ratio.**

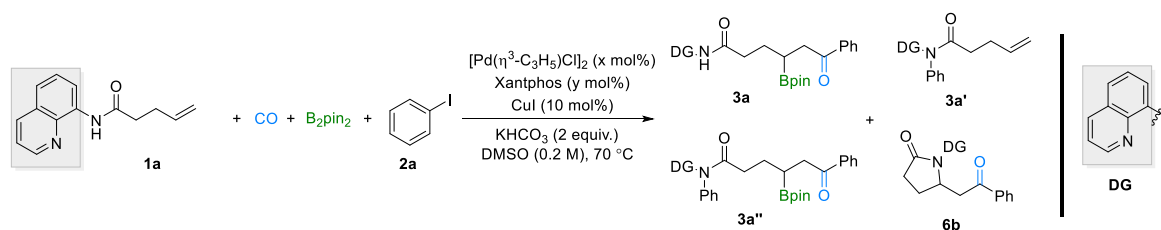

| Entry | x : y | <b>3a</b> (%) | <b>3a'</b> (%) | <b>3a''</b> (%) | <b>6b</b> (%) |
|-------|-------|---------------|----------------|-----------------|---------------|
| 1     | 1:2   | 14            | 2              | 8               | 0             |
| 2     | 2:4   | 49            | 18             | 0               | 4             |
| 3     | 2.5:5 | 58            | 14             | 0               | 13            |
| 4     | 3:6   | 36            | 10             | 0               | 14            |
| 5     | 4:8   | 44            | 20             | 0               | 17            |
| 6     | 2.5:6 | 45            | 10             | 0               | 12            |

Reaction conditions: *N*-(quinolin-8-yl)pent-4-enamide (0.1 mmol), iodobenzene (2.0 equiv.), B<sub>2</sub>pin<sub>2</sub> (1.5 equiv.), [Pd(η<sup>3</sup>-C<sub>3</sub>H<sub>5</sub>)Cl]<sub>2</sub> (x mol%), Xantphos (y mol%), CuI (10 mol%), KHCO<sub>3</sub> (2 equiv.), CO (10 bar), DMSO (0.2 M), 70 °C, 18 h. Yields were determined by <sup>1</sup>H NMR analysis of the crude reaction mixture using 1,3,5-trimethoxybenzene as internal standard.



### 3. General Procedure for Preparing Alkene.

Substrate Synthesis (Yields are unoptimized)

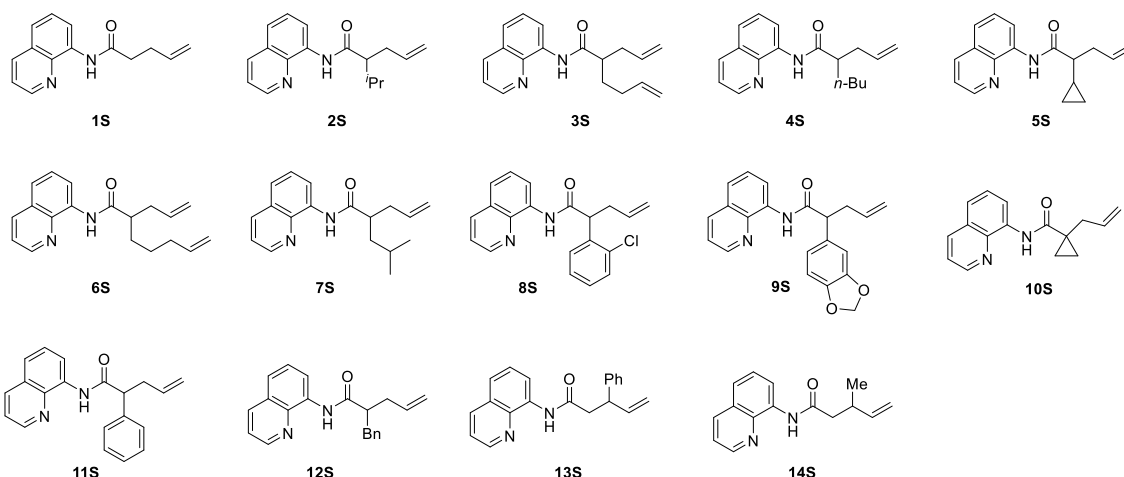

#### 3.1 Synthesis of substrate 1S.

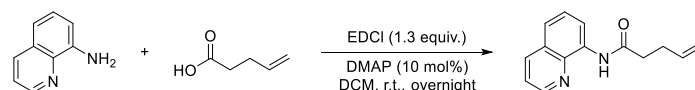

Enoic acid (1.3 mmol, commercial sources) was charged into a 100 mL RB flask containing 10 mL DCM at room temperature. Aminopyridine (10 mmol), EDCI (2.5 g, 13 mmol) and DMAP (122 mg, 1 mmol) were added sequentially, and the reaction was stirred at room temperature for 16 h. The brown solution was diluted with DCM (100 mL), washed with HCl (100 mL, 0.1 mol/L), sat. NaHCO<sub>3</sub> (100 mL, ×2) and brine (100 mL, ×1), and purified by column chromatography (20% EtOAc in *n*-pentane) to afford desired amide substrates.

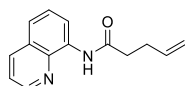

#### N-(Quinolin-8-yl)pent-4-enamide (1S)

<sup>1</sup>H NMR (300 MHz, CDCl<sub>3</sub>) δ 9.82 (s, 1H), 8.90–8.71 (m, 2H), 8.16 (dd, *J* = 8.5, 1.5 Hz, 1H), 7.59–7.41 (m, 3H), 6.04–5.85 (m, 1H), 5.22–5.00 (m, 2H), 2.71–2.47 (m, 4H).

<sup>13</sup>C NMR (75 MHz, CDCl<sub>3</sub>) δ 170.9, 148.1, 138.3, 136.9, 136.4, 134.5, 127.9, 127.4, 121.6, 121.4, 116.5, 115.7, 37.3, 29.5.

#### 3.2 Synthesis of substrate 2S-7S.

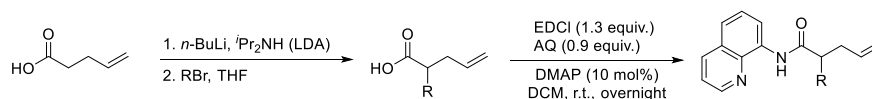

*n*-BuLi (4.1 mL, 2.7 M in toluene 11 mmol) was added dropwise to a cold (0 °C) solution of *i*Pr<sub>2</sub>NH (1.54 mL, 5.05 mmol) in THF (10 mL), and the mixture was stirred for 30 min. Then, a solution of pent-4-enoic acid (5 mmol) in THF (10 mL) was added dropwise over 20 min and stirring was continued for another 30 min at the same temperature. Alkyl bromide (6.5 mmol) was added, and the stirring was continued for another 6 h. The solvent was removed under reduced pressure. The resulting residue was diluted with water (50 mL) and extracted with ethylacetate (50 mL). pH of the separated aqueous layer was adjusted to 2 by HCl (6 M) and then extracted with

ethylacetate. The combined organic layers were washed with brine, dried with Na<sub>2</sub>SO<sub>4</sub>, and filtered. The solvent was evaporated, and the crude acid was taken forward to the next step without further purification. The crude acid (~2-5 mmol) was charged into a 100 mL RB flask containing 10 mL DCM. 8-Aminoquinoline (0.9 equiv), EDCI (1.3 equiv) and DMAP (0.1 equiv) were added sequentially, and the reaction was stirred at room temperature for 16 h. The brown solution was diluted with DCM (100 mL), washed with HCl (100 mL, 0.1 mol/L), sat. NaHCO<sub>3</sub> (100 mL, ×2) and brine (100 mL, ×1), and purified by column chromatography (20% EtOAc in *n*-pentane) to afford desired amide substrates.

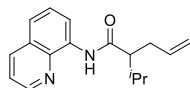

### 2-Isopropyl-*N*-(quinolin-8-yl)pent-4-enamide (2S)

<sup>1</sup>H NMR (300 MHz, CDCl<sub>3</sub>) δ 9.80 (s, 1H), 8.93 – 8.70 (m, 2H), 8.14 (dd, *J* = 8.5, 1.5 Hz, 1H), 7.59 – 7.38 (m, 3H), 5.87 (ddt, *J* = 17.0, 10.0, 7.0 Hz, 1H), 5.19 – 5.06 (m, 1H), 4.98 (ddt, *J* = 10.0, 2.0, 1.0 Hz, 1H), 2.64 – 2.37 (m, 2H), 2.30 (ddd, *J* = 10.0, 7.5, 4.2 Hz, 1H), 2.06 (dp, *J* = 8.0, 6.5 Hz, 1H), 1.06 (dd, *J* = 8.5, 6.5 Hz, 6H).

<sup>13</sup>C NMR (75 MHz, CDCl<sub>3</sub>) δ 173.4, 148.1, 138.4, 136.3, 136.0, 134.4, 127.9, 127.4, 121.5, 121.3, 116.6, 116.4, 56.1, 34.5, 30.8, 20.7, 20.4.

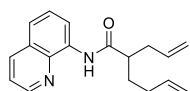

### 2-Allyl-*N*-(quinolin-8-yl)hex-5-enamide (3S)

<sup>1</sup>H NMR (300 MHz, CDCl<sub>3</sub>) δ 9.85 (s, 1H), 8.89 – 8.73 (m, 2H), 8.10 (dd, *J* = 8.5, 1.5 Hz, 1H), 7.57 – 7.37 (m, 3H), 5.95 – 5.68 (m, 2H), 5.20 – 4.92 (m, 4H), 2.66 – 2.30 (m, 3H), 2.26 – 2.07 (m, 2H), 2.01 – 1.84 (m, 1H), 1.69 (dddd, *J* = 13.5, 9.0, 7.0, 4.5 Hz, 1H).

<sup>13</sup>C NMR (75 MHz, CDCl<sub>3</sub>) δ 173.6, 148.0, 138.3, 137.7, 136.1, 135.4, 134.2, 127.8, 127.2, 121.4, 121.3, 116.9, 116.3, 115.3, 47.9, 37.1, 31.4.

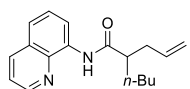

### 2-Allyl-*N*-(quinolin-8-yl)hexanamide (4S)

<sup>1</sup>H NMR (300 MHz, CDCl<sub>3</sub>) δ 9.84 (s, 1H), 8.90 – 8.73 (m, 2H), 8.14 (dd, *J* = 8.5, 1.5 Hz, 1H), 7.58 – 7.40 (m, 3H), 5.87 (dddd, *J* = 17.0, 10.0, 7.0, 6.5 Hz, 1H), 5.21 – 4.94 (m, 2H), 2.55 (dtdd, *J* = 11.0, 8.0, 6.0, 4.5 Hz, 2H), 2.37 (tdt, *J* = 8.0, 5.5, 1.5 Hz, 1H), 1.87 – 1.72 (m, 1H), 1.68 – 1.55 (m, 1H), 1.46 – 1.29 (m, 4H), 0.93 – 0.82 (m, 3H).

<sup>13</sup>C NMR (75 MHz, CDCl<sub>3</sub>) δ 174.0, 148.1, 138.3, 136.2, 135.7, 134.4, 127.8, 127.3, 121.5, 121.3, 116.8, 116.4, 48.9, 37.2, 32.2, 29.6, 22.7, 13.9.

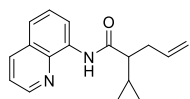

### 2-Cyclopropyl-*N*-(quinolin-8-yl)pent-4-enamide (5S)

<sup>1</sup>H NMR (300 MHz, CDCl<sub>3</sub>) δ 10.06 (s, 1H), 8.84 – 8.64 (m, 2H), 8.06 (dd, *J* = 8.5, 1.5 Hz, 1H), 7.52 – 7.26 (m, 3H), 5.86 (ddt, *J* = 17.0, 10.0, 7.0 Hz, 1H), 5.13 – 4.85 (m, 2H), 2.69 – 2.40 (m, 2H), 1.74 (ddd, *J* = 10.0, 7.5, 6.0 Hz, 1H), 1.15 – 1.00 (m, 1H), 0.68 – 0.52 (m, 2H), 0.45 – 0.34 (m, 1H), 0.23 (ddd, *J* = 9.5, 5.0, 1.5 Hz, 1H).

$^{13}\text{C}$  NMR (75 MHz,  $\text{CDCl}_3$ )  $\delta$  173.2, 148.1, 138.5, 136.2, 135.8, 134.6, 127.9, 127.4, 121.5, 121.3, 116.7, 116.4, 53.5, 36.8, 13.5, 4.9, 4.3.

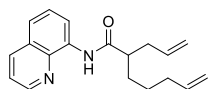

### 2-Allyl-N-(quinolin-8-yl)hept-6-enamide (6S)

$^1\text{H}$  NMR (300 MHz,  $\text{CDCl}_3$ )  $\delta$  9.85 (s, 1H), 8.88–8.74 (m, 2H), 8.15 (dd,  $J$  = 8.5, 1.5 Hz, 1H), 7.57–7.41 (m, 3H), 5.95–5.69 (m, 2H), 5.19–4.88 (m, 4H), 2.56 (dddd,  $J$  = 9.5, 8.0, 6.5, 4.0 Hz, 2H), 2.43–2.29 (m, 1H), 2.16–2.04 (m, 2H), 1.90–1.74 (m, 1H), 1.70–1.57 (m, 1H), 1.57–1.42 (m, 2H).

$^{13}\text{C}$  NMR (75 MHz,  $\text{CDCl}_3$ )  $\delta$  173.9, 148.1, 138.4, 136.3, 135.6, 134.4, 127.9, 127.4, 121.5, 121.4, 116.9, 116.5, 114.7, 48.8, 37.2, 33.7, 32.0, 26.7.

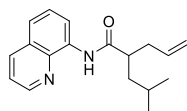

### 2-Isobutyl-N-(quinolin-8-yl)pent-4-enamide (7S)

$^1\text{H}$  NMR (300 MHz,  $\text{CDCl}_3$ )  $\delta$  9.86 (s, 1H), 8.87–8.71 (m, 2H), 8.15 (dd,  $J$  = 8.5, 1.5 Hz, 1H), 7.61–7.37 (m, 3H), 5.87 (dddd,  $J$  = 16.5, 10.0, 7.5, 6.5 Hz, 1H), 5.19–4.97 (m, 2H), 2.70–2.47 (m, 2H), 2.33 (dddt,  $J$  = 14.0, 7.0, 6.0, 1.0 Hz, 1H), 1.87–1.62 (m, 2H), 1.40 (ddd,  $J$  = 13.0, 8.5, 5.0 Hz, 1H), 0.98 (d,  $J$  = 6.5 Hz, 3H), 0.93 (d,  $J$  = 6.5 Hz, 3H).

$^{13}\text{C}$  NMR (75 MHz,  $\text{CDCl}_3$ )  $\delta$  174.1, 148.2, 138.4, 136.3, 135.7, 134.4, 127.9, 127.4, 121.5, 121.3, 116.9, 116.4, 46.9, 41.7, 37.7, 26.0, 23.3, 22.2.

### 3.3 Synthesis of substrate 8S-12S.

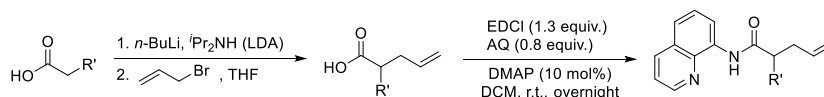

*n*-BuLi (4.1 mL, 2.7 M in toluene 11 mmol) was added dropwise to a cold (0 °C) solution of *i*Pr<sub>2</sub>NH (1.54 mL, 5.05 mmol) in THF (10 mL), and the mixture was stirred for 30 min. Then, a solution of carboxylic acid (5 mmol) in THF (10 mL) was added dropwise over 20 min and stirring was continued for another 30 min at the same temperature. Allyl bromide (6.5 mmol) was added, and the stirring was continued for another 6 h. The solvent was removed under reduced pressure. The resulting residue was diluted with water (50 mL) and extracted with ethyl acetate (50 mL). pH of the separated aqueous layer was adjusted to 2 by HCl (6 M) and then extracted with ethyl acetate. The combined organic layers were washed with brine, dried with Na<sub>2</sub>SO<sub>4</sub>, and filtered. The solvent was evaporated, and the crude acid was taken forward to the next step without further purification. The crude acid (~2–5 mmol) was charged into a 100 mL RB flask containing 10 mL DCM. 8-Aminoquinoline (0.9 equiv), EDCI (1.3 equiv) and DMAP (0.1 equiv) were added sequentially, and the reaction was stirred at room temperature for 16 h. The brown solution was diluted with DCM (100 mL), washed with HCl (100 mL, 0.1 mol/L), sat. NaHCO<sub>3</sub> (100 mL, ×2) and brine (100 mL, ×1), and purified by column chromatography (20% EtOAc in *n*-pentane) to afford desired amide substrates.

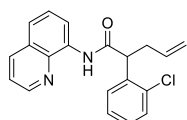

**2-(2-Chlorophenyl)-N-(quinolin-8-yl)pent-4-enamide (8S)**

<sup>1</sup>H NMR (300 MHz, CDCl<sub>3</sub>) δ 10.11 (s, 1H), 8.82 (dd, *J* = 7.5, 1.5 Hz, 1H), 8.71 (dd, *J* = 4.5, 1.5 Hz, 1H), 7.99 (dd, *J* = 8.5, 1.5 Hz, 1H), 7.68 (dd, *J* = 8.0, 1.5 Hz, 1H), 7.50–7.35 (m, 3H), 7.29 (ddd, *J* = 7.5, 4.5, 3.0 Hz, 2H), 7.19 (td, *J* = 7.5, 1.5 Hz, 1H), 5.92 (ddt, *J* = 17.0, 10.0, 7.0 Hz, 1H), 5.35–4.93 (m, 2H), 4.53 (dd, *J* = 8.0, 7.0 Hz, 1H), 3.15 (dddt, *J* = 14.5, 8.0, 6.5, 1.5 Hz, 1H), 2.74 (dtt, *J* = 14.0, 7.0, 1.5 Hz, 1H).

<sup>13</sup>C NMR (75 MHz, CDCl<sub>3</sub>) δ 170.1, 147.9, 138.0, 136.6, 135.8, 135.0, 134.2, 133.7, 129.4, 128.6, 128.3, 127.5, 127.2, 126.9, 121.4, 121.3, 117.1, 116.1, 49.4, 36.3.

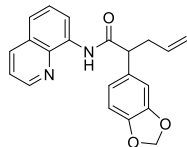**2-(Benzo[d][1,3]dioxol-5-yl)-N-(quinolin-8-yl)pent-4-enamide (9S)**

<sup>1</sup>H NMR (300 MHz, CDCl<sub>3</sub>) δ 9.90 (s, 1H), 8.78–8.73 (m, 2H), 8.12 (dd, *J* = 8.5, 1.5 Hz, 1H), 7.56–7.45 (m, 2H), 7.42 (dd, *J* = 8.5, 4.0 Hz, 1H), 7.04–6.87 (m, 2H), 6.80 (dd, *J* = 8.0, 0.5 Hz, 1H), 5.95–5.91 (m, 2H), 5.81 (ddt, *J* = 17.0, 10.0, 7.0 Hz, 1H), 5.20–4.96 (m, 2H), 3.73 (t, *J* = 7.5 Hz, 1H), 3.06–2.96 (m, 1H), 2.70–2.56 (m, 1H).

<sup>13</sup>C NMR (75 MHz, CDCl<sub>3</sub>) δ 171.4, 148.1, 148.0, 146.9, 138.4, 136.2, 135.6, 134.4, 133.1, 127.8, 127.3, 121.5, 121.5, 121.4, 117.0, 116.3, 108.4, 108.2, 101.0, 54.2, 37.5.

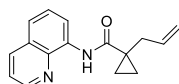**1-Allyl-N-(quinolin-8-yl)cyclopropane-1-carboxamide (10S)**

<sup>1</sup>H NMR (300 MHz, CDCl<sub>3</sub>) δ 10.36 (s, 1H), 8.81 (dd, *J* = 4.0, 1.5 Hz, 1H), 8.76 (dd, *J* = 7.0, 2.0 Hz, 1H), 8.14 (dd, *J* = 8.5, 1.5 Hz, 1H), 7.55–7.48 (m, 2H), 7.44 (dd, *J* = 8.5, 4.0 Hz, 1H), 5.99 (ddt, *J* = 17.0, 10.0, 6.5 Hz, 1H), 5.46 (dq, *J* = 17.0, 1.5 Hz, 1H), 5.19 (dt, *J* = 10.5, 1.5 Hz, 1H), 2.64 (dt, *J* = 6.5, 1.5 Hz, 2H), 1.44–1.39 (m, 2H), 0.86–0.80 (m, 2H).

<sup>13</sup>C NMR (75 MHz, CDCl<sub>3</sub>) δ 172.7, 148.0, 138.7, 136.2, 134.9, 134.7, 127.9, 127.4, 121.5, 121.1, 117.9, 116.2, 38.2, 24.8, 15.3.

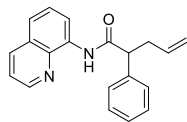**2-Phenyl-N-(quinolin-8-yl)pent-4-enamide (11S)**

<sup>1</sup>H NMR (300 MHz, CDCl<sub>3</sub>) δ 9.93 (s, 1H), 8.79 (dd, *J* = 7.5, 2.0 Hz, 1H), 8.72 (dd, *J* = 4.0, 1.5 Hz, 1H), 8.08 (dd, *J* = 8.5, 1.5 Hz, 1H), 7.57–7.43 (m, 4H), 7.43–7.24 (m, 4H), 5.85 (ddt, *J* = 17.0, 10.0, 7.0 Hz, 1H), 5.24–4.97 (m, 2H), 3.83 (t, *J* = 7.5 Hz, 1H), 3.21–3.00 (m, 1H), 2.80–2.61 (m, 1H).

<sup>13</sup>C NMR (75 MHz, CDCl<sub>3</sub>) δ 171.3, 148.0, 139.2, 138.3, 136.1, 135.6, 134.4, 128.8, 128.0, 127.7, 127.3, 127.2, 121.4, 121.4, 116.9, 116.2, 54.6, 37.5.

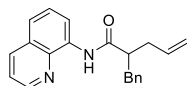**2-Benzyl-N-(quinolin-8-yl)pent-4-enamide (12S)**

<sup>1</sup>H NMR (300 MHz, CDCl<sub>3</sub>) δ 9.76 (s, 1H), 8.88 (dd, *J* = 7.5, 1.5 Hz, 1H), 8.72 (dd, *J* = 4.0, 1.5 Hz, 1H), 8.02 (dd, *J* = 8.5, 1.5 Hz, 1H), 7.55–7.47 (m, 1H), 7.42 (dd, *J* = 8.5, 1.5 Hz, 1H), 7.37–7.23 (m, 5H), 7.19–7.11 (m,

1H), 5.95 (ddt,  $J = 17.0, 10.0, 7.0$  Hz, 1H), 5.27 – 5.06 (m, 2H), 3.28 – 3.15 (m, 1H), 3.02 – 2.87 (m, 2H), 2.73 – 2.61 (m, 1H), 2.53 – 2.41 (m, 1H).

$^{13}\text{C}$  NMR (75 MHz,  $\text{CDCl}_3$ )  $\delta$  172.7, 147.7, 139.2, 138.0, 135.8, 135.1, 134.0, 128.7, 128.2, 127.5, 127.0, 126.1, 121.2, 121.2, 117.2, 116.2, 50.5, 38.3, 36.6.

### 3.4 Synthesis of substrate 13S and 14S.

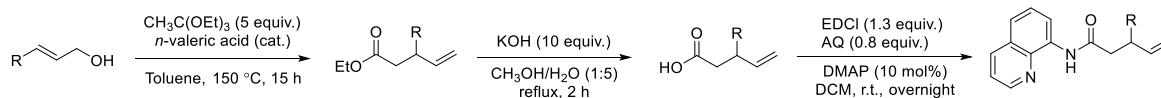

To the mixture of allyl alcohol (10 mmol) and triethyl orthoacetate (9.2 mL, 50 mmol) in toluene (30 mL) was added *n*-valeric acid (cat.). The mixture was heated at 150 °C for 15 h. The mixture was cooled and concentrated under reduced pressure. The crude product was dissolved in methanol (5 mL), and a solution of potassium hydroxide (100 mmol) in water (25 mL) was added. The mixture was refluxed for 2 h. After cooling, the solution was washed with ethyl ether and acidified with concentrated HCl to pH 2. The acidic solution was extracted with ethyl acetate (3 × 20 mL), and combined organic phases were dried over  $\text{Na}_2\text{SO}_4$ , filtered, and concentrated under a vacuum. The crude acid was taken forward to the next step without further purification. The crude acid (~4 mmol) was charged into a 100 mL RB flask containing 10 mL DCM. 8-Aminoquinoline (0.65 g, 4.5 mmol), EDCI (1.24 g, 6.5 mmol) and DMAP (61 mg, 0.5 mmol) were added sequentially, and the reaction was stirred at room temperature for 16 h. The brown solution was diluted with DCM (100 mL), washed with HCl (100 mL, 0.1 mol/L), sat.  $\text{NaHCO}_3$  (100 mL, ×2) and brine (100 mL, ×1), and purified by column chromatography (20% EtOAc in *n*-pentane) to afford the desired product.

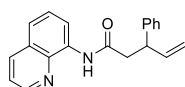

#### 3-Phenyl-*N*-(quinolin-8-yl)pent-4-enamide (13S)

$^1\text{H}$  NMR (300 MHz,  $\text{CDCl}_3$ )  $\delta$  9.82 (s, 1H), 8.83 (dd,  $J = 7.5, 1.5$  Hz, 1H), 8.77 (dd,  $J = 4.0, 1.5$  Hz, 1H), 8.07 (dt,  $J = 8.5, 1.5$  Hz, 1H), 7.54 – 7.42 (m, 2H), 7.40 – 7.30 (m, 5H), 7.29 – 7.20 (m, 1H), 6.15 (ddd,  $J = 17.0, 10.5, 7.0$  Hz, 1H), 5.27 – 5.11 (m, 2H), 4.24 – 4.11 (m, 1H), 3.11 – 2.89 (m, 2H).

$^{13}\text{C}$  NMR (75 MHz,  $\text{CDCl}_3$ )  $\delta$  169.3, 147.8, 142.5, 140.2, 138.0, 136.0, 134.1, 128.4, 127.6, 127.4, 127.0, 126.4, 121.3, 121.2, 116.2, 114.9, 45.6, 43.7.

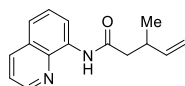

#### 3-Methyl-*N*-(quinolin-8-yl)pent-4-enamide (14S)

$^1\text{H}$  NMR (300 MHz,  $\text{CDCl}_3$ )  $\delta$  9.80 (s, 1H), 8.85 – 8.75 (m, 2H), 8.14 (dd,  $J = 8.5, 1.5$  Hz, 1H), 7.60 – 7.41 (m, 3H), 5.90 (ddd,  $J = 17.0, 10.5, 7.0$  Hz, 1H), 5.18 – 4.93 (m, 2H), 2.89 (dq,  $J = 13.5, 7.0$  Hz, 1H), 2.70 – 2.40 (m, 2H), 1.17 (d,  $J = 7.0$  Hz, 3H).

$^{13}\text{C}$  NMR (75 MHz,  $\text{CDCl}_3$ )  $\delta$  170.4, 148.1, 142.6, 138.3, 136.3, 134.4, 127.9, 127.4, 121.5, 121.4, 116.4, 113.6, 45.2, 34.8, 19.7.

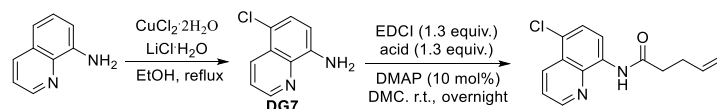

A round-bottomed flask (25 mL) was charged with substrate (720 mg, 5 mmol),  $\text{CuCl}_2 \cdot 2\text{H}_2\text{O}$  (2.5 g, 6 mmol),  $\text{LiCl} \cdot \text{H}_2\text{O}$  (0.3 g, 2 mmol) and EtOH (10 mL). The resulting reaction mixture was stirred at reflux. After the completion of the reaction monitored by TLC, EtOH was removed under reduced pressure. Then ammonium hydroxide (10 mL, 25% w/w) and water (10 mL) were added, and the aqueous phase was extracted with EA (30 mL). The combined organic phase was washed with brine (30 mL) and dried over anhydrous  $\text{Na}_2\text{SO}_4$ . The solvent was removed under reduced pressure. The crude mixture was purified by chromatography on silica gel to obtain the desired 5-chloroquinolin-8-amine (220 mg, 25% yield, yellow solid).

The pent-4-enoic acid (111  $\mu\text{L}$ , 1.1 mmol) was charged into a 50 mL RB flask containing 10 mL DCM. 5-Chloroquinolin-8-amine (142 mg, 0.8 mmol), EDCI (256 mg, 1.1 mmol) and DMAP (15.2 mg, 0.11 mmol) were added sequentially, and the reaction was stirred at room temperature for 16 h. The yellow solution was diluted with DCM (50 mL), washed with HCl (20 mL, 0.1 mol/L), sat.  $\text{NaHCO}_3$  (50 mL,  $\times 2$ ) and brine (50 mL,  $\times 1$ ), and purified by column chromatography (20% EtOAc in *n*-pentane) to afford the desired product **16S** (130 mg, 63% yield, white solid).

$^1\text{H NMR}$  (400 MHz,  $\text{CDCl}_3$ )  $\delta$  9.76 (s, 1H), 8.82 (dd,  $J = 4.0, 1.5$  Hz, 1H), 8.71 (d,  $J = 8.5$  Hz, 1H), 8.54 (dd,  $J = 8.5, 1.5$  Hz, 1H), 7.65 – 7.45 (m, 2H), 5.92 (ddt,  $J = 17.0, 10.5, 6.5$  Hz, 1H), 5.15 (dq,  $J = 17.0, 1.5$  Hz, 1H), 5.05 (dq,  $J = 10.5, 1.5$  Hz, 1H), 2.66 (ddd,  $J = 8.0, 6.5, 1.5$  Hz, 2H), 2.56 (qq,  $J = 6.5, 1.5$  Hz, 2H).

$^{13}\text{C NMR}$  (101 MHz,  $\text{CDCl}_3$ )  $\delta$  170.9, 148.5, 138.8, 136.7, 133.7, 133.4, 127.2, 125.8, 124.1, 122.2, 116.3, 115.8, 37.2, 29.3.

### 3.5 Procedure for synthesis of $d_2$ -*N*-(quinolin-8-yl)pent-4-enamide ( $d_2$ -7d)<sup>[3]</sup>

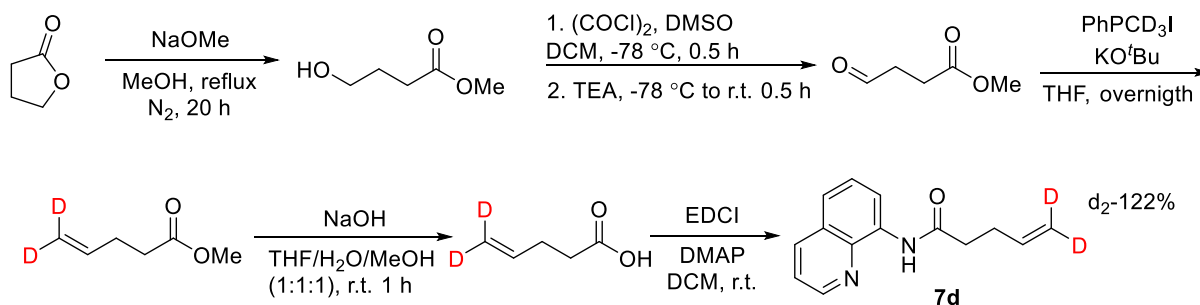

#### Lactone cleavage.<sup>[4]</sup>

To the 0.5 M NaOMe solution in MeOH (4.0 mL, 2.0 mmol) diluted with MeOH (16.0 mL, 1.0 M) was added  $\gamma$ -butyrolactone (1.72 g, 20.0 mmol). The reaction mixture was heated at reflux for 20 h. The reaction mixture was monitored by TLC using DCM/pentane as the mobile phase. After disappearance of starting material, the reaction mixture was diluted with  $\text{Et}_2\text{O}$  (50 mL), filtered off through a pad of celite and silica. After washing with  $\text{Et}_2\text{O}$ , the filtrate was concentrated under reduced pressure. The residue was purified by flash chromatography on silica gel (DCM/pentane) to give methyl 4-hydroxybutanoate as pale yellow oil (1.45 g, 52%).

#### Alcohol oxidation.<sup>[4]</sup>

To a solution of oxalyl chloride (1.1 mL, 13.5 mmol) in DCM (30 mL, 0.3 M) was added DMSO (1.95 mL, 26.9 mmol) dropwisely at  $-78$  °C under argon atmosphere. After stirring for 30 min at  $-78$  °C, the solution of 4-hydroxybutanoate (1.45 g, 12.3 mmol) in DCM (12 mL) was added to the reaction mixture, and resulting mixture

was stirred at  $-78\text{ }^{\circ}\text{C}$  for 30 min. Triethylamine (8.5 mL, 61.0 mmol) was added, and the mixture could warm to room temperature gradually and stirred for 30 min. The reaction mixture was monitored by TLC using EA/pentane = 1:1 as the mobile phase. After disappearance of starting material, the reaction mixture was quenched with distilled water (50 mL) and extracted with DCM ( $3\times 50\text{ mL}$ ). The combined organic layer was washed with aqueous  $\text{NH}_4\text{Cl}$  ( $2\times 100\text{ mL}$ ) and brine and dried over  $\text{MgSO}_4$  and concentrated under reduced pressure to give methyl 4-oxobutanoate as a pale-yellow oil (1.43, quant.). The residue was used in the next step without further purification.

Wittig reaction<sup>[5]</sup>

In an oven dried flask, methyl  $d_2$ -triphenylphosphonium iodide (0.91 g, 1.2 equiv.) was taken and to this abs. THF (1.6 mL/mmol) was added. The suspension was cooled to  $0\text{ }^{\circ}\text{C}$ ,  $t\text{-BuOK}$  (0.4 g, 1.2 equiv.) was added and the resulting yellow suspension was stirred at  $0\text{ }^{\circ}\text{C}$  for 45 min. To this suspension, a solution of methyl 4-oxobutanoate (3 mmol) in THF (0.7 mL/mmol) was added dropwise and the resulting mixture was warmed gradually to rt. and stirred at rt for 16 h. Reaction mixture was concentrated under reduced pressure and filtered over Celite®. The filtrate was concentrated under reduced pressure to afford yellow oil. The residue was used in the next step without further purification.

**Ester hydrolysis and amide bond formation (d2-7d)**

To a solution of methyl pent-4-enoate-5,5- $d_2$  (~115 mg, ~1.0 mmol) in THF/ $\text{H}_2\text{O}$ / $\text{MeOH}$  = 1:1:1 (2.0 mL, 1.0 M) was added lithium hydroxide monohydrate (83.5 mg, 2.0 mmol). The reaction mixture was stirred at room temperature for 1 h. The reaction mixture was monitored by TLC using EA/pentane = 1:3 as the mobile phase. After disappearance of starting material, the reaction mixture was diluted with distilled water (25 mL) and extracted with EA ( $3\times 25\text{ mL}$ ). The aqueous layer was acidified with 2 M HCl at  $0\text{ }^{\circ}\text{C}$  and extracted with EA ( $3\times 25\text{ mL}$ ). The combined organic layer was dried over  $\text{MgSO}_4$  and concentrated under reduced pressure to give pent-4-enoic-5,5- $d_2$  acid as a pale-yellow oil (~1 mmol). The residue was used in the next step without further purification. The crude acid (~1 mmol) was charged into a 100 mL RB flask containing 10 mL DCM. 8-Aminoquinoline (187 mg, 1.3 mmol), EDCI (24.8 g, 1.3 mmol) and DMAP (15 mg, 0.1 mmol) were added sequentially, and the reaction was stirred at room temperature for 16 h. The brown solution was diluted with DCM (100 mL), washed with HCl (30 mL, 0.1 mol/L), sat.  $\text{NaHCO}_3$  ( $30\text{ mL}\times 2$ ) and brine ( $30\text{ mL}\times 1$ ), and purified by column chromatography (20% EtOAc in  $n$ -pentane) to afford the desired product.

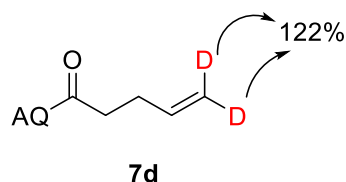

$^1\text{H NMR}$  (300 MHz,  $\text{CDCl}_3$ )  $\delta$  9.82 (s, 1H), 8.85 – 8.75 (m, 2H), 8.15 (dd,  $J$  = 8.5, 1.5 Hz, 1H), 7.57 – 7.41 (m, 3H), 6.00 – 5.87 (m, 1H), 5.19 – 5.11 (m, 0.39H), 5.09 – 5.00 (m, 0.39H), 2.67 (ddd,  $J$  = 8.0, 6.5, 1.5 Hz, 1.84H), 2.62 – 2.53 (m, 1.88H).

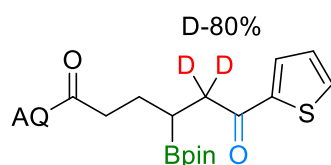

## *d*<sub>2</sub>-6-Oxo-*N*-(quinolin-8-yl)-4-(4,4,5,5-tetramethyl-1,3,2-dioxaborolan-2-yl)-6-(thiophen-2-yl)hexanamide (7e)

Pentane/EA = 3:1 (R<sub>f</sub> = 0.35), yellow oil (25.0 mg, 54% yield).

<sup>1</sup>H NMR (300 MHz, CDCl<sub>3</sub>) δ 9.86 (s, 1H), 8.89 – 8.67 (m, 2H), 8.15 (dd, *J* = 8.3, 1.7 Hz, 1H), 7.72 (dd, *J* = 3.8, 1.1 Hz, 1H), 7.58 (dd, *J* = 5.0, 1.2 Hz, 1H), 7.56 – 7.46 (m, 2H), 7.44 (dd, *J* = 8.3, 4.2 Hz, 1H), 7.09 (dd, *J* = 5.0, 3.8 Hz, 1H), 3.18 – 3.13 (m, 1.2H), 2.74 – 2.59 (m, 1.82H), 2.10 – 1.85 (m, 2H), 1.52 (td, *J* = 8.2, 7.3, 5.1 Hz, 1H), 1.28 (d, *J* = 3.8 Hz, 12H).

<sup>13</sup>C NMR (75 MHz, CDCl<sub>3</sub>) δ 192.9, 171.7, 148.0, 144.0, 138.4, 136.3, 134.6, 133.1, 131.8, 127.9, 127.9, 127.4, 121.5, 121.3, 116.4, 83.3, 41.4, 37.6, 26.6, 24.8, 24.8.

## 4. General Procedure for *anti*-Borocarbonylation of alkenes.

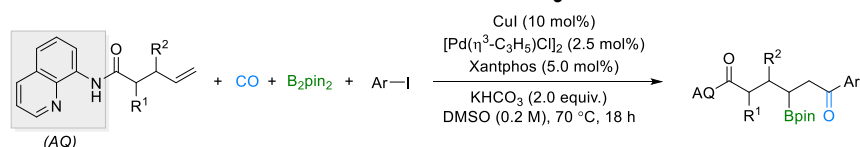

A 4 mL screw-cap vial was charged with [Pd(η-C<sub>3</sub>H<sub>5</sub>)Cl]<sub>2</sub> (0.9 mg, 2.5 mol%), CuI (1.9 mg, 10 mol%), Xantphos (2.9 mg, 5 mol%), B<sub>2</sub>pin<sub>2</sub> (38.1 mg, 1.5 equiv.), *N*-(quinolin-8-yl)pent-4-enamide (0.1 mmol), KHCO<sub>3</sub> (20.0 mg, 2.0 equiv.) and an oven-dried stir bar. The vial was closed with a Teflon septum and cap and connected to the atmosphere via a needle. After DMSO (0.2 M) and iodobenzene (2.0 equiv.) were added with a syringe under argon atmosphere, the vial was moved to an alloy plate and put into a Parr 4560 series autoclave (300 mL) under an argon atmosphere. At room temperature, the autoclave was flushed with CO three times and charged with 10 bar of CO. The autoclave was placed on a heating plate equipped with a magnetic stirrer and an aluminum block. The reaction mixture was heated to 70 °C for 12 h. The reaction was then quenched upon addition of water (10 mL) and the mixture was extracted with EA (10 mL). The combined organic phase was dried using Na<sub>2</sub>SO<sub>4</sub> and then concentrated in vacuo. The crude product was purified by column chromatography on silica gel to afford the corresponding product.

## 5. Spectroscopic Data of Products

### 5.1 Failed substrates

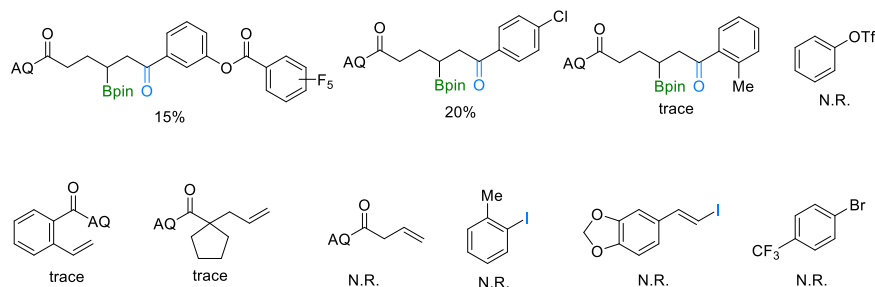

### 5.2 Date of Products

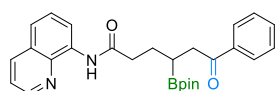

## 6-Oxo-6-phenyl-*N*-(quinolin-8-yl)-4-(4,4,5,5-tetramethyl-1,3,2-dioxaborolan-2-yl)hexanamide (3a)



Pentane/EA = 3:1 (Rf = 0.35), yellow oil (23.3 mg, 51% yield).

**<sup>1</sup>H NMR (300 MHz, CDCl<sub>3</sub>)** δ 9.87 (s, 1H), 8.83 – 8.74 (m, 2H), 8.15 (dd, *J* = 8.5, 1.5 Hz, 1H), 7.99 – 7.91 (m, 2H), 7.57 – 7.46 (m, 3H), 7.46 – 7.40 (m, 3H), 3.24 (d, *J* = 7.0 Hz, 2H), 2.69 (t, *J* = 8.0 Hz, 2H), 2.09 – 1.90 (m, 2H), 1.51 (dq, *J* = 9.0, 6.5 Hz, 1H), 1.29 (s, 6H), 1.27 (s, 6H).

**<sup>13</sup>C NMR (75 MHz, CDCl<sub>3</sub>)** δ 200.0, 171.8, 148.0, 138.4, 136.9, 136.3, 134.6, 132.8, 128.4, 128.0, 127.9, 127.4, 121.5, 121.3, 116.4, 83.2, 41.1, 37.7, 26.6, 24.8, 24.7.

**<sup>11</sup>B NMR (96 MHz, CDCl<sub>3</sub>)** δ 33.4.

**HRMS (ESI):** calcd for [M+H]<sup>+</sup> C<sub>27</sub>H<sub>31</sub>BN<sub>2</sub>O<sub>4</sub> 459.2455, found: 459.2458.

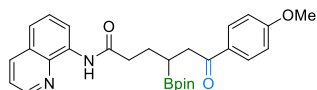

**6-(4-Methoxyphenyl)-6-oxo-N-(quinolin-8-yl)-4-(4,4,5,5-tetramethyl-1,3,2-dioxaborolan-2-yl)hexanamide (3b)**

Pentane/EA = 3:1 (Rf = 0.20), colorless oil (32.4 mg, 66% yield).

**<sup>1</sup>H NMR (300 MHz, CDCl<sub>3</sub>)** δ 9.86 (s, 1H), 8.86 – 8.72 (m, 2H), 8.14 (dd, *J* = 8.5, 1.5 Hz, 1H), 7.97 – 7.90 (m, 2H), 7.56 – 7.41 (m, 3H), 6.93 – 6.86 (m, 2H), 3.85 (s, 3H), 3.18 (dd, *J* = 7.0, 1.5 Hz, 2H), 2.68 (dd, *J* = 8.5, 7.0 Hz, 2H), 2.12 – 1.86 (m, 2H), 1.54 – 1.43 (m, 1H), 1.29 (s, 6H), 1.27 (s, 6H).

**<sup>13</sup>C NMR (75 MHz, CDCl<sub>3</sub>)** δ 198.5, 171.9, 163.3, 148.0, 138.4, 136.3, 134.6, 130.3, 130.0, 127.9, 127.4, 121.5, 121.2, 116.4, 113.5, 83.1, 55.4, 40.7, 37.8, 26.7, 24.8, 24.8.

**<sup>11</sup>B NMR (96 MHz, CDCl<sub>3</sub>)** δ 33.7.

**HRMS (ESI):** calcd for [M+H]<sup>+</sup> C<sub>28</sub>H<sub>33</sub>BN<sub>2</sub>O<sub>5</sub> 489.2561, found: 489.2572.

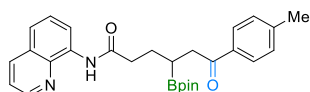

**6-Oxo-N-(quinolin-8-yl)-4-(4,4,5,5-tetramethyl-1,3,2-dioxaborolan-2-yl)-6-(p-tolyl)hexanamide (3c)**

Pentane/EA = 3:1 (Rf = 0.35), yellow oil (25.0 mg, 53% yield).

**<sup>1</sup>H NMR (300 MHz, CDCl<sub>3</sub>)** δ 9.87 (s, 1H), 8.82 – 8.75 (m, 2H), 8.14 (dd, *J* = 8.5, 1.5 Hz, 1H), 7.89 – 7.82 (m, 2H), 7.56 – 7.46 (m, 2H), 7.44 (dd, *J* = 8.5, 4.0 Hz, 1H), 7.24 – 7.18 (m, 2H), 3.29 – 3.12 (m, 2H), 2.68 (t, *J* = 8.0 Hz, 2H), 2.39 (s, 3H), 2.11 – 1.88 (m, 2H), 1.50 (dq, *J* = 8.5, 7.0 Hz, 1H), 1.29 (s, 6H), 1.27 (s, 6H).

**<sup>13</sup>C NMR (75 MHz, CDCl<sub>3</sub>)** δ 199.6, 171.8, 148.0, 143.5, 138.4, 136.2, 134.6, 134.4, 129.1, 128.1, 127.9, 127.4, 121.5, 121.2, 116.4, 83.1, 41.0, 37.7, 26.7, 24.8, 24.7, 21.6.

**HRMS (ESI):** calcd for [M+H]<sup>+</sup> C<sub>28</sub>H<sub>33</sub>BN<sub>2</sub>O<sub>4</sub> 473.2611, found: 473.2612.

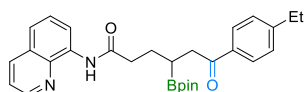

**6-(4-Ethylphenyl)-6-oxo-N-(quinolin-8-yl)-4-(4,4,5,5-tetramethyl-1,3,2-dioxaborolan-2-yl)hexanamide (3d)**

Pentane/EA = 3:1 (Rf = 0.35), yellow oil (34.0 mg, 70% yield).

**<sup>1</sup>H NMR (300 MHz, CDCl<sub>3</sub>)** δ 9.95 – 9.81 (m, 1H), 8.86 – 8.70 (m, 2H), 8.15 (dd, *J* = 8.5, 1.5 Hz, 1H), 7.92 – 7.84 (m, 2H), 7.57 – 7.46 (m, 2H), 7.44 (dd, *J* = 8.5, 4.0 Hz, 1H), 7.27 – 7.22 (m, 2H), 3.21 (d, *J* = 7.0 Hz, 2H), 2.69 (m, 4H), 2.11 – 1.87 (m, 2H), 1.56 – 1.44 (m, 1H), 1.29 (s, 6H), 1.27 (s, 6H), 1.23 (t, *J* = 7.5 Hz, 3H).

**<sup>13</sup>C NMR (75 MHz, CDCl<sub>3</sub>)** δ 199.6, 171.9, 149.7, 148.0, 138.4, 136.3, 134.7, 128.2, 127.9, 127.4, 121.5, 121.3, 116.4, 83.1, 41.0, 37.7, 28.9, 26.7, 24.8, 24.8, 15.2.

**<sup>11</sup>B NMR (96 MHz, CDCl<sub>3</sub>)** δ 33.6.

**HRMS (ESI):** calcd for  $[M+H]^+$   $C_{29}H_{35}BN_2O_4$  487.2768, found: 487.2772.

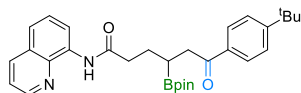

**6-(4-(*tert*-Butyl)phenyl)-6-oxo-*N*-(quinolin-8-yl)-4-(4,4,5,5-tetramethyl-1,3,2-dioxaborolan-2-yl)hexanamide (3e)**

Pentane/EA = 3:1 ( $R_f$  = 0.35), yellow oil (37.5 mg, 73% yield).

**$^1H$  NMR (300 MHz,  $CDCl_3$ )**  $\delta$  9.87 (s, 1H), 8.82 – 8.74 (m, 2H), 8.15 (dd,  $J$  = 8.5, 1.5 Hz, 1H), 7.93 – 7.86 (m, 2H), 7.55 – 7.47 (m, 2H), 7.46 – 7.42 (m, 3H), 3.22 (d,  $J$  = 7.5 Hz, 2H), 2.68 (t,  $J$  = 8.0 Hz, 2H), 2.09 – 1.87 (m, 2H), 1.55 – 1.45 (m, 1H), 1.33 (s, 9H), 1.29 (s, 6H), 1.27 (s, 6H).

**$^{13}C$  NMR (75 MHz,  $CDCl_3$ )**  $\delta$  199.6, 171.9, 156.5, 148.0, 138.4, 136.3, 134.7, 134.3, 128.0, 127.9, 127.4, 125.4, 121.5, 121.3, 116.4, 83.1, 41.0, 37.7, 35.0, 31.1, 26.7, 24.8, 24.8.

**$^{11}B$  NMR (96 MHz,  $CDCl_3$ )**  $\delta$  33.02.

**HRMS (ESI):** calcd for  $[M+H]^+$   $C_{29}H_{35}BN_2O_4$  515.3081, found: 515.3088.

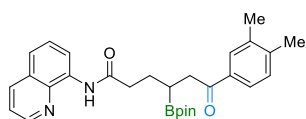

**6-(3,4-Dimethylphenyl)-6-oxo-*N*-(quinolin-8-yl)-4-(4,4,5,5-tetramethyl-1,3,2-dioxaborolan-2-yl)hexanamide (3f)**

Pentane/EA = 3:1 ( $R_f$  = 0.35), yellow oil (27.0 mg, 56% yield).

**$^1H$  NMR (300 MHz,  $CDCl_3$ )**  $\delta$  9.87 (s, 1H), 8.84 – 8.71 (m, 2H), 8.14 (dd,  $J$  = 8.5, 1.5 Hz, 1H), 7.74 – 7.65 (m, 2H), 7.55 – 7.46 (m, 2H), 7.44 (dd,  $J$  = 8.5, 4.0 Hz, 1H), 7.20 – 7.14 (m, 1H), 3.21 (d,  $J$  = 6.5 Hz, 2H), 2.68 (t,  $J$  = 8.0 Hz, 2H), 2.29 (d,  $J$  = 2.5 Hz, 6H), 2.09 – 1.87 (m, 2H), 1.55 – 1.44 (m, 1H), 1.29 (s, 6H), 1.27 (s, 6H).

**$^{13}C$  NMR (75 MHz,  $CDCl_3$ )**  $\delta$  199.9, 171.9, 148.0, 142.2, 138.4, 136.7, 136.2, 134.8, 134.6, 129.6, 129.1, 127.9, 127.4, 125.8, 121.5, 121.2, 116.4, 83.1, 40.9, 37.7, 26.6, 24.8, 24.8, 20.0, 19.7.

**HRMS (ESI):** calcd for  $[M+H]^+$   $C_{29}H_{35}BN_2O_4$  487.2768, found: 487.2776.

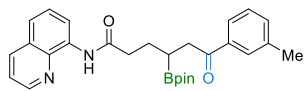

**6-Oxo-*N*-(quinolin-8-yl)-4-(4,4,5,5-tetramethyl-1,3,2-dioxaborolan-2-yl)-6-(*m*-tolyl)hexanamide (3g)**

Pentane/EA = 3:1 ( $R_f$  = 0.35), yellow oil (19.2 mg, 41% yield).

**$^1H$  NMR (300 MHz,  $CDCl_3$ )**  $\delta$  9.87 (s, 1H), 8.84 – 8.74 (m, 2H), 8.15 (dd,  $J$  = 8.5, 1.5 Hz, 1H), 7.80 – 7.72 (m, 2H), 7.56 – 7.47 (m, 2H), 7.44 (dd,  $J$  = 8.5, 4.0 Hz, 1H), 7.37 – 7.28 (m, 2H), 3.22 (d,  $J$  = 7.0 Hz, 2H), 2.68 (dd,  $J$  = 8.5, 7.5 Hz, 2H), 2.39 (q,  $J$  = 0.5 Hz, 3H), 2.10 – 1.88 (m, 2H), 1.50 (dq,  $J$  = 9.0, 7.0 Hz, 1H), 1.29 (s, 6H), 1.27 (s, 6H).

**$^{13}C$  NMR (100 MHz,  $CDCl_3$ )**  $\delta$  200.2, 171.8, 148.0, 138.4, 138.2, 136.9, 136.3, 134.6, 133.6, 128.5, 128.3, 127.9, 127.4, 125.2, 121.5, 121.3, 116.4, 83.2, 41.1, 37.7, 26.6, 24.8, 24.8, 21.3.

**$^{11}B$  NMR (128 MHz,  $CDCl_3$ )**  $\delta$  32.9.

**HRMS (ESI):** calcd for  $[M+H]^+$   $C_{28}H_{33}BN_2O_4$  473.2611, found: 473.2617.

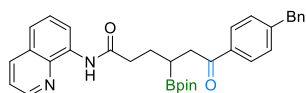

**6-(4-Benzylphenyl)-6-oxo-*N*-(quinolin-8-yl)-4-(4,4,5,5-tetramethyl-1,3,2-dioxaborolan-2-yl)hexanamide (3h)**

Pentane/EA = 3:1 (Rf = 0.35), yellow oil (31.2 mg, 57% yield).

**<sup>1</sup>H NMR (300 MHz, CDCl<sub>3</sub>)** δ 9.86 (s, 1H), 8.87 – 8.70 (m, 2H), 8.14 (dd, *J* = 8.5, 1.5 Hz, 1H), 7.92 – 7.84 (m, 2H), 7.56 – 7.46 (m, 2H), 7.44 (dd, *J* = 8.5, 4.5 Hz, 1H), 7.34 – 7.26 (m, 2H), 7.26 – 7.14 (m, 5H), 4.02 (s, 2H), 3.20 (d, *J* = 7.5 Hz, 2H), 2.68 (t, *J* = 8.0 Hz, 2H), 2.10 – 1.88 (m, 2H), 1.55 – 1.43 (m, 1H), 1.28 (s, 6H), 1.27 (s, 6H).

**<sup>13</sup>C NMR (75 MHz, CDCl<sub>3</sub>)** δ 199.6, 171.8, 148.0, 146.5, 140.1, 138.4, 136.3, 135.0, 134.6, 129.0, 128.9, 128.6, 128.3, 127.9, 127.4, 126.3, 121.5, 121.3, 116.4, 83.2, 41.9, 41.0, 37.7, 26.6, 24.8, 24.7.

**<sup>11</sup>B NMR (96 MHz, CDCl<sub>3</sub>)** δ 33.5.

**HRMS (ESI):** calcd for [M+H]<sup>+</sup> C<sub>34</sub>H<sub>37</sub>BN<sub>2</sub>O<sub>4</sub> 549.2925, found: 549.2935.

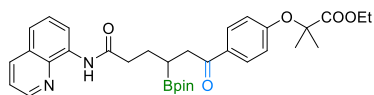

**Ethyl 2-methyl-2-(4-(6-oxo-6-(quinolin-8-ylamino)-3-(4,4,5,5-tetramethyl-1,3,2-dioxaborolan-2-yl)hexanoyl)phenoxy)propanoate (3i)**

Pentane/EA = 3:1 (Rf = 0.30), yellow oil (35.9 mg, 61% yield).

**<sup>1</sup>H NMR (300 MHz, CDCl<sub>3</sub>)** δ 9.86 (s, 1H), 8.84 – 8.70 (m, 2H), 8.14 (dd, *J* = 8.5, 1.5 Hz, 1H), 7.91 – 7.84 (m, 2H), 7.55 – 7.46 (m, 2H), 7.43 (dd, *J* = 8.5, 4.0 Hz, 1H), 6.83 – 6.77 (m, 2H), 4.22 (q, *J* = 7.0 Hz, 2H), 3.25 – 3.08 (m, 2H), 2.67 (t, *J* = 8.0 Hz, 2H), 2.07 – 1.84 (m, 2H), 1.64 (s, 6H), 1.51 – 1.41 (m, 1H), 1.28 (s, 6H), 1.27 (s, 6H), 1.21 (t, *J* = 7.0 Hz, 3H).

**<sup>13</sup>C NMR (75 MHz, CDCl<sub>3</sub>)** δ 198.5, 173.7, 171.8, 159.5, 148.0, 138.4, 136.2, 134.6, 130.5, 129.8, 127.9, 127.4, 121.5, 121.2, 117.3, 116.4, 83.1, 79.2, 61.6, 40.8, 37.7, 26.7, 25.3, 24.8, 24.7, 14.0.

**<sup>11</sup>B NMR (96 MHz, CDCl<sub>3</sub>)** δ 32.8.

**HRMS (ESI):** calcd for [M+H]<sup>+</sup> C<sub>33</sub>H<sub>41</sub>BN<sub>2</sub>O<sub>7</sub> 589.3085, found: 589.3087.

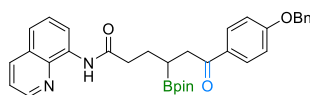

**6-(4-(Benzyloxy)phenyl)-6-oxo-N-(quinolin-8-yl)-4-(4,4,5,5-tetramethyl-1,3,2-dioxaborolan-2-yl)hexanamide (3j)**

Pentane/EA = 2:1 (Rf = 0.30), yellow oil (38.9 mg, 69% yield).

**<sup>1</sup>H NMR (300 MHz, CDCl<sub>3</sub>)** δ 9.87 (s, 1H), 8.84 – 8.72 (m, 2H), 8.15 (dd, *J* = 8.5, 1.5 Hz, 1H), 7.97 – 7.89 (m, 2H), 7.57 – 7.46 (m, 2H), 7.46 – 7.31 (m, 6H), 7.01 – 6.94 (m, 2H), 5.12 (s, 2H), 3.18 (dd, *J* = 7.0, 1.5 Hz, 2H), 2.68 (dd, *J* = 8.5, 7.0 Hz, 2H), 2.10 – 1.86 (m, 2H), 1.55 – 1.42 (m, 1H), 1.29 (s, 6H), 1.27 (s, 6H).

**<sup>13</sup>C NMR (100 MHz, CDCl<sub>3</sub>)** δ 198.5, 171.9, 162.4, 148.1, 138.4, 136.3, 136.3, 134.7, 130.3, 130.2, 128.7, 128.2, 127.9, 127.5, 127.4, 121.5, 121.3, 116.4, 114.4, 83.2, 70.1, 40.8, 37.8, 26.7, 24.9, 24.8.

**<sup>11</sup>B NMR (128 MHz, CDCl<sub>3</sub>)** δ 32.8.

**HRMS (ESI):** calcd for [M+H]<sup>+</sup> C<sub>34</sub>H<sub>37</sub>BN<sub>2</sub>O<sub>5</sub> 565.2874, found: 565.2884.

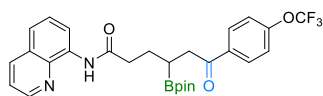

**6-Oxo-N-(quinolin-8-yl)-4-(4,4,5,5-tetramethyl-1,3,2-dioxaborolan-2-yl)-6-(4-(trifluoromethoxy)phenyl)hexanamide (3k)**

Pentane/EA = 3:1 (Rf = 0.42), colorless oil (22.8 mg, 42% yield).

**<sup>1</sup>H NMR (400 MHz, CDCl<sub>3</sub>)** δ 9.87 (s, 1H), 8.83–8.73 (m, 2H), 8.15 (dd, *J* = 8.5, 1.5 Hz, 1H), 8.02–7.96 (m, 2H), 7.55–7.47 (m, 2H), 7.45 (dd, *J* = 8.5, 4.0 Hz, 1H), 7.24 (dd, *J* = 9.0, 1.0 Hz, 2H), 3.21 (d, *J* = 7.0 Hz, 2H), 2.73–2.64 (m, 2H), 2.10–1.90 (m, 2H), 1.52 (dq, *J* = 9.0, 7.0 Hz, 1H), 1.28 (s, 6H), 1.27 (s, 6H).

**<sup>13</sup>C NMR (100 MHz, CDCl<sub>3</sub>)** δ 198.5, 171.7, 152.4, 148.0, 138.4, 136.3, 135.1, 134.6, 130.0, 127.9, 127.4, 121.5, 121.3, 120.3, 120.3 (q, *J* = 258.0 Hz), 116.4, 83.3, 41.1, 37.6, 26.5, 24.8, 24.7.

**<sup>19</sup>F NMR (282 MHz, CDCl<sub>3</sub>)** δ -57.6 (s, 3F).

**HRMS (ESI):** calcd for [M+H]<sup>+</sup> C<sub>28</sub>H<sub>30</sub>BN<sub>2</sub>O<sub>5</sub>F<sub>3</sub> 543.2278, found: 543.2278.

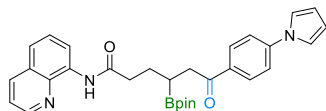

**6-(4-(1H-Pyrrol-1-yl)phenyl)-6-oxo-N-(quinolin-8-yl)-4-(4,4,5,5-tetramethyl-1,3,2-dioxaborolan-2-yl)hexanamide (3l)**

Pentane/EA = 3:1 (R<sub>f</sub> = 0.20), yellow oil (32.0 mg, 60% yield).

**<sup>1</sup>H NMR (300 MHz, CDCl<sub>3</sub>)** δ 9.87 (s, 1H), 8.84–8.73 (m, 2H), 8.15 (dd, *J* = 8.5, 1.5 Hz, 1H), 8.05–7.98 (m, 2H), 7.56–7.47 (m, 2H), 7.46–7.39 (m, 3H), 7.17–7.13 (m, 2H), 6.41–6.37 (m, 2H), 3.23 (d, *J* = 7.0 Hz, 2H), 2.69 (t, *J* = 8.0 Hz, 2H), 2.11–1.89 (m, 2H), 1.58–1.48 (m, 1H), 1.30 (s, 6H), 1.28 (s, 6H).

**<sup>13</sup>C NMR (75 MHz, CDCl<sub>3</sub>)** δ 198.7, 171.8, 148.0, 143.8, 138.4, 136.3, 134.6, 133.8, 129.8, 127.9, 127.4, 121.5, 121.3, 119.3, 119.0, 116.4, 111.4, 83.2, 40.9, 37.7, 26.6, 24.8, 24.8.

**<sup>11</sup>B NMR (96 MHz, CDCl<sub>3</sub>)** δ 33.3.

**HRMS (ESI):** calcd for [M+H]<sup>+</sup> C<sub>28</sub>H<sub>30</sub>BN<sub>2</sub>O<sub>5</sub>F<sub>3</sub> 524.2720, found: 524.2728.

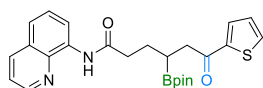

**6-Oxo-N-(quinolin-8-yl)-4-(4,4,5,5-tetramethyl-1,3,2-dioxaborolan-2-yl)-6-(thiophen-2-yl)hexanamide (3m)**

Pentane/EA = 3:1 (R<sub>f</sub> = 0.35), yellow oil (37.5 mg, 81% yield).

**<sup>1</sup>H NMR (300 MHz, CDCl<sub>3</sub>)** δ 9.86 (s, 1H), 8.86–8.69 (m, 2H), 8.14 (dd, *J* = 8.5, 1.5 Hz, 1H), 7.72 (dd, *J* = 4.0, 1.0 Hz, 1H), 7.58 (dd, *J* = 5.0, 1.1 Hz, 1H), 7.55–7.46 (m, 2H), 7.44 (dd, *J* = 8.5, 4.0 Hz, 1H), 7.09 (dd, *J* = 5.0, 4.0 Hz, 1H), 3.17 (d, *J* = 7.0 Hz, 2H), 2.67 (t, *J* = 8.0 Hz, 2H), 2.08–1.89 (m, 2H), 1.52 (dq, *J* = 8.5, 6.5 Hz, 1H), 1.28 (s, 6H), 1.27 (s, 6H).

**<sup>13</sup>C NMR (75 MHz, CDCl<sub>3</sub>)** δ 192.8, 171.7, 148.0, 144.0, 138.4, 136.3, 134.6, 133.1, 131.7, 127.9, 127.9, 127.4, 121.5, 121.3, 116.4, 83.3, 41.4, 37.6, 26.6, 24.8, 24.7.

**<sup>11</sup>B NMR (96 MHz, CDCl<sub>3</sub>)** δ 32.8.

**HRMS (ESI):** calcd for [M+Na]<sup>+</sup> C<sub>25</sub>H<sub>29</sub>BN<sub>2</sub>O<sub>4</sub>S 487.1833, found: 487.1831.

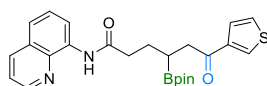

**6-oxo-N-(quinolin-8-yl)-4-(4,4,5,5-tetramethyl-1,3,2-dioxaborolan-2-yl)-6-(thiophen-3-yl)hexanamide (3n)**

Pentane/EA = 3:1 (R<sub>f</sub> = 0.35), yellow oil (35.0 mg, 75% yield).

**<sup>1</sup>H NMR (300 MHz, CDCl<sub>3</sub>)** δ 9.86 (s, 1H), 8.84–8.74 (m, 2H), 8.14 (dd, *J* = 8.5, 1.5 Hz, 1H), 8.04 (dd, *J* = 3.0, 1.5 Hz, 1H), 7.55–7.46 (m, 3H), 7.44 (dd, *J* = 8.5, 4.0 Hz, 1H), 7.31–7.24 (m, 1H), 3.14 (d, *J* = 7.0 Hz, 2H), 2.67 (dd, *J* = 8.5, 7.0 Hz, 2H), 2.13–1.88 (m, 2H), 1.49 (dq, *J* = 9.0, 7.0 Hz, 1H), 1.28 (s, 6H), 1.27 (s, 6H).

**<sup>13</sup>C NMR (75 MHz, CDCl<sub>3</sub>)** δ 194.3, 171.8, 148.0, 142.1, 138.4, 136.3, 134.6, 131.7, 127.9, 127.4, 126.9, 126.0, 121.5, 121.3, 116.4, 83.2, 42.1, 37.7, 26.6, 24.8, 24.8.

**HRMS (ESI):** calcd for  $[M+Na]^+$   $C_{25}H_{29}BN_2O_4S$  487.1837, found: 487.1836.

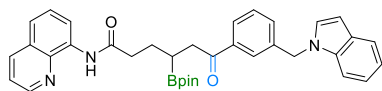

**6-(3-((1H-Indol-1-yl)methyl)phenyl)-6-oxo-N-(quinolin-8-yl)-4-(4,4,5,5-tetramethyl-1,3,2-dioxaborolan-2-yl)hexanamide (3o)**

Pentane/EA = 3:1 ( $R_f$  = 0.30), yellow oil (29.0 mg, 49% yield).

**$^1H$  NMR (300 MHz,  $CDCl_3$ )**  $\delta$  9.87 (s, 1H), 8.83 – 8.74 (m, 2H), 8.15 (dd,  $J$  = 8.5, 1.5 Hz, 1H), 7.88 – 7.77 (m, 2H), 7.65 (ddd,  $J$  = 7.5, 1.5, 1.0 Hz, 1H), 7.56 – 7.47 (m, 2H), 7.44 (dd,  $J$  = 8.5, 4.0 Hz, 1H), 7.32 (t,  $J$  = 7.5 Hz, 1H), 7.27 – 7.24 (m, 1H), 7.20 – 7.08 (m, 4H), 6.57 (dd,  $J$  = 3.0, 1.0 Hz, 1H), 5.35 (s, 2H), 3.17 (d,  $J$  = 7.0 Hz, 2H), 2.67 (t,  $J$  = 8.0 Hz, 2H), 2.08 – 1.87 (m, 2H), 1.55 – 1.42 (m, 1H), 1.29 (s, 6H), 1.27 (s, 6H).

**$^{13}C$  NMR (100 MHz,  $CDCl_3$ )**  $\delta$  199.8, 171.8, 148.0, 138.4, 138.1, 137.3, 136.3, 136.1, 134.6, 131.0, 129.0, 128.7, 128.1, 127.9, 127.4, 127.4, 126.3, 121.8, 121.5, 121.3, 121.0, 119.6, 116.4, 109.5, 102.0, 83.2, 49.8, 41.1, 37.6, 26.5, 24.8, 24.7.

**HRMS (ESI):** calcd for  $[M+H]^+$   $C_{36}H_{38}BN_3O_4$  588.3033, found: 588.3036.

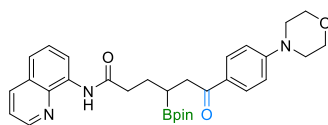

**6-(4-Morpholinophenyl)-6-oxo-N-(quinolin-8-yl)-4-(4,4,5,5-tetramethyl-1,3,2-dioxaborolan-2-yl)hexanamide (3p)**

Pentane/EA = 1:1 ( $R_f$  = 0.5), yellow oil (37.9 mg, 70% yield).

**$^1H$  NMR (300 MHz,  $CDCl_3$ )**  $\delta$  9.86 (s, 1H), 8.84 – 8.72 (m, 2H), 8.14 (dd,  $J$  = 8.5, 1.5 Hz, 1H), 7.93 – 7.86 (m, 2H), 7.56 – 7.46 (m, 2H), 7.44 (dd,  $J$  = 8.0, 4.0 Hz, 1H), 6.86 – 6.80 (m, 2H), 3.87 – 3.82 (m, 4H), 3.32 – 3.23 (m, 4H), 3.16 (dd,  $J$  = 7.0, 3.5 Hz, 2H), 2.67 (t,  $J$  = 8.0 Hz, 2H), 2.09 – 1.89 (m, 2H), 1.47 (m, 1H), 1.29 (s, 6H), 1.28 (s, 6H).

**$^{13}C$  NMR (75 MHz,  $CDCl_3$ )**  $\delta$  198.2, 171.9, 154.1, 148.0, 138.4, 136.2, 134.6, 130.0, 127.9, 127.8, 127.4, 121.5, 121.2, 116.4, 113.3, 83.0, 66.6, 47.6, 40.5, 37.8, 26.7, 24.8, 24.8.

**$^{11}B$  NMR (96 MHz,  $CDCl_3$ )**  $\delta$  32.7.

**HRMS (ESI):** calcd for  $[M+H]^+$   $C_{31}H_{38}BN_3O_5$  544.2983, found: 544.2990.

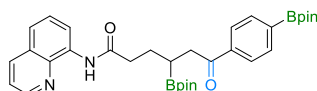

**6-Oxo-N-(quinolin-8-yl)-4-(4,4,5,5-tetramethyl-1,3,2-dioxaborolan-2-yl)-6-(4-(4,4,5,5-tetramethyl-1,3,2-dioxaborolan-2-yl)phenyl)hexanamide (3q)**

Pentane/EA = 3:1 ( $R_f$  = 0.32), yellow oil (xx mg, 68% yield).

**$^1H$  NMR (300 MHz,  $CDCl_3$ )**  $\delta$  9.87 (s, 1H), 8.84 – 8.74 (m, 2H), 8.15 (dd,  $J$  = 8.5, 1.5 Hz, 1H), 7.95 – 7.89 (m, 2H), 7.88 – 7.83 (m, 2H), 7.56 – 7.47 (m, 2H), 7.44 (dd,  $J$  = 8.5, 4.0 Hz, 1H), 3.24 (d,  $J$  = 7.0 Hz, 2H), 2.68 (dd,  $J$  = 8.5, 7.0 Hz, 2H), 2.11 – 1.87 (m, 2H), 1.55 – 1.46 (m, 1H), 1.35 (s, 12H), 1.29 (s, 6H), 1.27 (s, 6H).

**$^{13}C$  NMR (100 MHz,  $CDCl_3$ )**  $\delta$  200.3, 171.8, 148.0, 138.8, 138.4, 136.3, 134.8, 134.6, 127.9, 127.4, 127.0, 121.5, 121.3, 116.4, 84.1, 83.2, 41.3, 37.7, 26.6, 24.9, 24.8, 24.7.

**$^{11}B$  NMR (96 MHz,  $CDCl_3$ )**  $\delta$  30.3.

**HRMS (ESI):** calcd for  $[M+Na]^+$   $C_{33}H_{42}B_2N_2O_6$  585.3307, found: 585.3317.

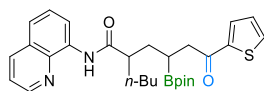

**2-Butyl-6-oxo-N-(quinolin-8-yl)-4-(4,4,5,5-tetramethyl-1,3,2-dioxaborolan-2-yl)-6-(thiophen-2-yl)hexanamide (4a) (diastereomer 1:1)**

Pentane/EA = 3:1 ( $R_f$  = 0.50), yellow oil (38.0 mg, 73% yield).

The reported dr was determined by  $^1\text{H}$  NMR analysis of purified **4a** and is consistent with that of the crude reaction mixture. The following analytical data correspond to the mixture.

$^1\text{H}$  NMR (300 MHz,  $\text{CDCl}_3$ )  $\delta$  10.03 – 9.91 (m, 1H), 8.88 – 8.73 (m, 2H), 8.14 (dt,  $J$  = 8.5, 1.5 Hz, 1H), 7.71 – 7.63 (m, 1H), 7.59 – 7.46 (m, 3H), 7.45 – 7.41 (m, 1H), 7.05 (ddd,  $J$  = 6.5, 5.0, 4.0 Hz, 1H), 3.23 – 3.01 (m, 2H), 2.81 – 2.52 (m, 1H), 2.14 – 1.42 (m, 5H), 1.35 (td,  $J$  = 5.5, 3.5 Hz, 4H), 1.30 (d,  $J$  = 1.5 Hz, 6H), 1.26 (d,  $J$  = 7.0 Hz, 6H), 0.90 – 0.83 (m, 3H).

$^{13}\text{C}$  NMR (75 MHz,  $\text{CDCl}_3$ )  $\delta$  192.8, 175.2, 147.9, 143.9, 138.6, 136.1, 134.7, 133.0, 131.7, 127.9, 127.8, 127.4, 121.4, 121.3, 116.6, 83.2, 48.5, 42.4, 34.7, 33.6, 29.7, 24.9, 24.8, 22.7, 13.9.

$^{11}\text{B}$  NMR (96 MHz,  $\text{CDCl}_3$ )  $\delta$  32.9.

HRMS (ESI): calcd for  $[\text{M}+\text{H}]^+$   $\text{C}_{29}\text{H}_{37}\text{BN}_2\text{O}_4\text{S}$  521.2645, found: 521.2656.

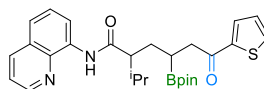

**2-Isopropyl-6-oxo-N-(quinolin-8-yl)-4-(4,4,5,5-tetramethyl-1,3,2-dioxaborolan-2-yl)-6-(thiophen-2-yl)hexanamide (4b) (diastereomer 1:1)**

Pentane/EA = 3:1 ( $R_f$  = 0.50), yellow oil (31.4 mg, 62% yield).

The reported dr was determined by  $^1\text{H}$  NMR analysis of purified **4b** and is consistent with that of the crude reaction mixture. The following analytical data correspond to the mixture.

$^1\text{H}$  NMR (300 MHz,  $\text{CDCl}_3$ )  $\delta$  10.03 – 9.87 (m, 1H), 8.91 – 8.71 (m, 2H), 8.18 – 8.10 (m, 1H), 7.67 (ddd,  $J$  = 22.0, 4.0, 1.1 Hz, 1H), 7.59 – 7.46 (m, 3H), 7.43 (ddd,  $J$  = 8.5, 4.0, 1.6 Hz, 1H), 7.04 (dt,  $J$  = 5.0, 3.5 Hz, 1H), 3.26 – 3.03 (m, 2H), 2.50 – 2.28 (m, 1H), 2.13 – 1.76 (m, 3H), 1.48 (dd,  $J$  = 9.0, 5.5 Hz, 1H), 1.30 (d,  $J$  = 3.5 Hz, 6H), 1.21 (d,  $J$  = 9.0 Hz, 6H), 1.09 – 0.98 (m, 6H).

$^{13}\text{C}$  NMR (75 MHz,  $\text{CDCl}_3$ )  $\delta$  192.9, 174.0, 148.0, 144.2, 138.5, 136.2, 134.5, 133.0, 131.8, 127.9, 127.8, 127.4, 121.4, 121.2, 116.5, 83.2, 54.9, 40.2, 31.6, 31.4, 24.9, 24.8, 21.1, 20.7.

$^{11}\text{B}$  NMR (96 MHz,  $\text{CDCl}_3$ )  $\delta$  34.3.

HRMS (ESI): calcd for  $[\text{M}+\text{Na}]^+$   $\text{C}_{28}\text{H}_{35}\text{BN}_2\text{O}_4\text{S}$  529.2303, found: 529.2304.

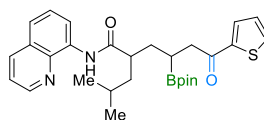

**2-Isobutyl-6-oxo-N-(quinolin-8-yl)-4-(4,4,5,5-tetramethyl-1,3,2-dioxaborolan-2-yl)-6-(thiophen-2-yl)hexanamide (4c) (diastereomer 3:2)**

Pentane/EA = 3:1 ( $R_f$  = 0.45), yellow oil (28.0 mg, 54% yield).

The reported dr was determined by  $^1\text{H}$  NMR analysis of purified **4c** and is consistent with that of the crude reaction mixture. The following analytical data correspond to the mixture.

$^1\text{H}$  NMR (300 MHz,  $\text{CDCl}_3$ )  $\delta$  10.09 – 9.94 (m, 1H), 8.90 – 8.71 (m, 2H), 8.14 (dt,  $J$  = 8.5, 1.5 Hz, 1H), 7.67 (ddd,  $J$  = 17.0, 4.0, 1.1 Hz, 1H), 7.58 – 7.46 (m, 3H), 7.43 (ddd,  $J$  = 8.5, 4.0, 1.0 Hz, 1H), 7.05 (dt,  $J$  = 5.0, 4.0 Hz,

1H), 3.24–3.01 (m, 2H), 2.93–2.66 (m, 1H), 2.05–1.69 (m, 3H), 1.59–1.33 (m, 3H), 1.32 (d,  $J = 3.0$  Hz, 6H), 1.28 (d,  $J = 7.5$  Hz, 6H), 0.96 (dd,  $J = 6.5, 4.0$  Hz, 3H), 0.91 (dd,  $J = 6.5, 4.0$  Hz, 3H).

$^{13}\text{C}$  NMR (75 MHz,  $\text{CDCl}_3$ )  $\delta$  192.8, 175.2, 147.9, 143.9, 138.7, 136.1, 134.7, 133.0, 131.7, 127.9, 127.9, 127.4, 121.5, 121.3, 116.6, 83.2, 46.4, 43.1, 41.0, 35.0, 26.0, 25.0, 24.8, 23.2, 22.3.

$^{11}\text{B}$  NMR (96 MHz,  $\text{CDCl}_3$ )  $\delta$  33.9.

HRMS (ESI): calcd for  $[\text{M}+\text{H}]^+$   $\text{C}_{29}\text{H}_{37}\text{BN}_2\text{O}_4\text{S}$  521.2645, found: 521.2650.

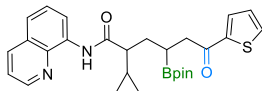

**2-Cyclopropyl-6-oxo-N-(quinolin-8-yl)-4-(4,4,5,5-tetramethyl-1,3,2-dioxaborolan-2-yl)-6-(thiophen-2-yl)hexanamide (4d) (diastereomer 2:1)**

Pentane/EA = 5:1 ( $R_f = 0.30$ ), brown oil (47.0 mg, 93% yield).

The reported dr was determined by  $^1\text{H}$  NMR analysis of purified **4d** and is consistent with that of the crude reaction mixture. The following analytical data correspond to the mixture.

$^1\text{H}$  NMR (300 MHz,  $\text{CDCl}_3$ )  $\delta$  10.11–10.07 (m, 1H), 8.95–8.67 (m, 2H), 8.14 (dd,  $J = 8.5, 1.5$  Hz, 1H), 7.73–7.63 (m, 1H), 7.60–7.46 (m, 3H), 7.43 (dd,  $J = 8.5, 4.5$  Hz, 1H), 7.11–7.02 (m, 1H), 3.32–2.98 (m, 2H), 2.33–1.83 (m, 3H), 1.56–1.36 (m, 1H), 1.25 (d,  $J = 10.0$  Hz, 12H), 1.17–1.04 (m, 1H), 0.74–0.54 (m, 2H), 0.50–0.17 (m, 2H).

$^{13}\text{C}$  NMR (75 MHz,  $\text{CDCl}_3$ )  $\delta$  192.8, 174.5, 148.0, 144.0, 138.6, 136.2, 134.8, 132.9, 131.7, 127.8, 127.4, 121.4, 121.3, 116.5, 83.2, 53.3, 42.2, 34.1, 24.8, 14.8, 4.7, 4.0.

HRMS (ESI): calcd for  $[\text{M}+\text{H}]^+$   $\text{C}_{28}\text{H}_{33}\text{BN}_2\text{O}_4\text{S}$  505.2337, found: 505.2338.

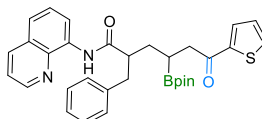

**2-Benzyl-6-oxo-N-(quinolin-8-yl)-4-(4,4,5,5-tetramethyl-1,3,2-dioxaborolan-2-yl)-6-(thiophen-2-yl)hexanamide (4e) (diastereomer 1:1)**

Pentane/EA = 3:1 ( $R_f = 0.45$ ), brown oil (35.8 mg, 65% yield).

The reported dr was determined by  $^1\text{H}$  NMR analysis of purified **4e** and is consistent with that of the crude reaction mixture. The following analytical data correspond to the mixture.

$^1\text{H}$  NMR (400 MHz,  $\text{CDCl}_3$ )  $\delta$  9.94–9.75 (m, 1H), 8.84–8.65 (m, 2H), 8.12 (dd,  $J = 8.5, 1.5$  Hz, 1H), 7.73–7.44 (m, 4H), 7.41 (dt,  $J = 8.0, 4.0$  Hz, 1H), 7.26–7.24 (m, 2H), 7.23–7.15 (m, 2H), 7.14–7.02 (m, 2H), 3.24–3.07 (m, 3H), 3.05–2.80 (m, 2H), 2.22–1.84 (m, 1H), 1.83–1.68 (m, 1H), 1.50–1.37 (m, 1H), 1.28 (s, 6H), 1.25 (s, 6H).

$^{13}\text{C}$  NMR (75 MHz,  $\text{CDCl}_3$ )  $\delta$  192.7, 173.7, 147.8, 144.0, 140.0, 138.4, 136.1, 134.5, 133.1, 131.8, 128.9, 128.3, 127.9, 127.8, 127.3, 126.1, 121.4, 116.6, 83.3, 50.1, 42.3, 39.7, 33.7, 24.8, 24.8.

$^{11}\text{B}$  NMR (96 MHz,  $\text{CDCl}_3$ )  $\delta$  33.4.

HRMS (ESI): calcd for  $[\text{M}+\text{Na}]^+$   $\text{C}_{32}\text{H}_{35}\text{BN}_2\text{O}_4\text{S}$  577.2303, found: 577.2314.

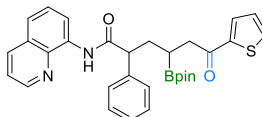

**6-Oxo-2-phenyl-N-(quinolin-8-yl)-4-(4,4,5,5-tetramethyl-1,3,2-dioxaborolan-2-yl)-6-(thiophen-2-yl)hexanamide (4f) (diastereomer 1:1)**

Pentane/EA = 3:1 (Rf = 0.50), yellow oil (32.4 mg, 60% yield).

The reported dr was determined by <sup>1</sup>H NMR analysis of purified **4f** and is consistent with that of the crude reaction mixture. The following analytical data correspond to the mixture.

**<sup>1</sup>H NMR (300 MHz, CDCl<sub>3</sub>)** δ 10.06–9.92 (m, 1H), 8.85–8.68 (m, 2H), 8.10 (ddd, *J* = 8.5, 3.5, 1.5 Hz, 1H), 7.65 (ddd, *J* = 8.0, 4.0, 1.0 Hz, 1H), 7.56 (ddd, *J* = 5.0, 2.5, 1.0 Hz, 1H), 7.53–7.42 (m, 4H), 7.42–7.30 (m, 3H), 7.29–7.21 (m, 1H), 7.06 (dd, *J* = 5.0, 4.0 Hz, 1H), 4.06–3.97 (m, 1H), 3.30–2.98 (m, 2H), 2.58–2.32 (m, 1H), 2.15–2.01 (m, 1H), 1.55–1.35 (m, 1H), 1.31–1.25 (m, 12H).

**<sup>13</sup>C NMR (75 MHz, CDCl<sub>3</sub>)** δ 192.7, 172.2, 148.0, 143.9, 140.2, 139.7, 138.5, 136.1, 134.6, 133.0, 131.7, 128.7, 128.4, 127.9, 127.8, 127.3, 121.4, 121.3, 116.4, 83.2, 53.9, 41.7, 34.9, 24.9.

**<sup>11</sup>B NMR (96 MHz, CDCl<sub>3</sub>)** δ 33.4.

**HRMS (ESI):** calcd for [M+H]<sup>+</sup> C<sub>31</sub>H<sub>33</sub>BN<sub>2</sub>O<sub>4</sub>S 541.2332, found: 541.2333.

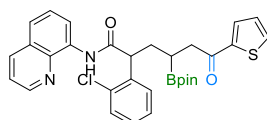

**2-(2-Chlorophenyl)-6-oxo-N-(quinolin-8-yl)-4-(4,4,5,5-tetramethyl-1,3,2-dioxaborolan-2-yl)-6-(thiophen-2-yl)hexanamide (4g) (diastereomer 1:1)**

Pentane/EA = 3:1 (Rf = 0.45), brown oil (32.8 mg, 57% yield).

The reported dr was determined by <sup>1</sup>H NMR analysis of purified **4g** and is consistent with that of the crude reaction mixture. The following analytical data correspond to the mixture.

**<sup>1</sup>H NMR (300 MHz, CDCl<sub>3</sub>)** δ 10.17–10.02 (m, 1H), 8.84–8.65 (m, 2H), 8.11 (dt, *J* = 8.5, 1.5 Hz, 1H), 7.71–7.62 (m, 2H), 7.57 (ddd, *J* = 5.0, 2.5, 1.0 Hz, 1H), 7.52–7.44 (m, 2H), 7.44–7.34 (m, 2H), 7.31–7.24 (m, 1H), 7.17 (dddd, *J* = 8.0, 7.5, 2.5, 1.5 Hz, 1H), 7.10–7.05 (m, 1H), 4.70–4.57 (m, 1H), 3.29–3.05 (m, 2H), 2.65–2.35 (m, 1H), 2.14–2.00 (m, 1H), 1.56–1.40 (m, 1H), 1.33–1.26 (m, 12H).

**<sup>13</sup>C NMR (75 MHz, CDCl<sub>3</sub>)** δ 192.6, 171.3, 148.1, 144.0, 137.4, 137.1, 136.1, 134.7, 134.3, 133.7, 133.1, 131.7, 129.6, 129.0, 128.3, 127.9, 127.8, 127.4, 127.3, 121.5, 116.4, 83.3, 48.8, 41.3, 33.1, 24.9.

**<sup>11</sup>B NMR (96 MHz, CDCl<sub>3</sub>)** δ 33.7.

**HRMS (ESI):** calcd for [M+H]<sup>+</sup> C<sub>31</sub>H<sub>32</sub>BClN<sub>2</sub>O<sub>4</sub>S 575.1943, found: 575.1946.

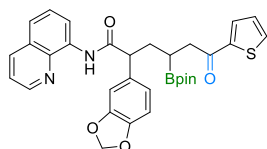

**2-(Benzo[d][1,3]dioxol-5-yl)-6-oxo-N-(quinolin-8-yl)-4-(4,4,5,5-tetramethyl-1,3,2-dioxaborolan-2-yl)-6-(thiophen-2-yl)hexanamide (4h) (diastereomer 1:1)**

Pentane/EA = 3:1 (Rf = 0.35), yellow oil (24.2 mg, 42% yield).

The reported dr was determined by <sup>1</sup>H NMR analysis of purified **4h** and is consistent with that of the crude reaction mixture. The following analytical data correspond to the mixture.

**<sup>1</sup>H NMR (300 MHz, CDCl<sub>3</sub>)** δ 10.04–9.92 (m, 1H), 8.76 (ddt, *J* = 8.5, 4.5, 2.0 Hz, 2H), 8.11 (ddd, *J* = 8.5, 2.5, 1.5 Hz, 1H), 7.66 (ddd, *J* = 5.0, 3.5, 1.5 Hz, 1H), 7.63–7.53 (m, 1H), 7.53–7.36 (m, 3H), 7.14–6.99 (m, 2H), 6.99–6.90 (m, 1H), 6.77 (dd, *J* = 8.0, 6.0 Hz, 1H), 5.91 (dq, *J* = 3.5, 1.5 Hz, 2H), 4.04–3.83 (m, 1H), 3.32–2.96 (m, 2H), 2.51–2.27 (m, 1H), 2.09–1.94 (m, 1H), 1.55–1.35 (m, 1H), 1.29 (dd, *J* = 4.0, 2.0 Hz, 12H).



$^{13}\text{C}$  NMR (75 MHz,  $\text{CDCl}_3$ )  $\delta$  192.7, 172.2, 148.0, 147.9, 146.7, 143.9, 138.5, 136.2, 134.6, 134.0, 133.4, 133.0, 131.7, 127.9, 127.3, 121.5, 121.2, 116.3, 108.5, 108.3, 100.9, 83.2, 53.4, 41.6, 34.8, 24.9, 24.8.

$^{11}\text{B}$  NMR (96 MHz,  $\text{CDCl}_3$ )  $\delta$  32.5.

HRMS (ESI): calcd for  $[\text{M}+\text{Na}]^+$   $\text{C}_{31}\text{H}_{32}\text{BClN}_2\text{O}_4\text{S}$  607.2044, found: 607.2057.

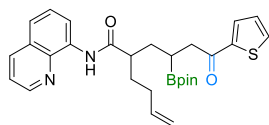

**2-(4-Oxo-2-(4,4,5,5-tetramethyl-1,3,2-dioxaborolan-2-yl)-4-(thiophen-2-yl)butyl)-N-(quinolin-8-yl)hex-5-enamide (4i) (diastereomer 1:1)**

Pentane/EA = 3:1 ( $R_f$  = 0.45), brown oil (38.0 mg, 73% yield).

The reported dr was determined by  $^1\text{H}$  NMR analysis of purified **4i** and is consistent with that of the crude reaction mixture. The following analytical data correspond to the mixture.

$^1\text{H}$  NMR (300 MHz,  $\text{CDCl}_3$ )  $\delta$  10.06 – 9.92 (m, 1H), 8.89 – 8.72 (m, 2H), 8.14 (dt,  $J$  = 8.5, 1.5 Hz, 1H), 7.67 (ddd,  $J$  = 17.0, 4.0, 1.1 Hz, 1H), 7.59 – 7.47 (m, 3H), 7.43 (ddd,  $J$  = 8.5, 4.0, 0.5 Hz, 1H), 7.06 (td,  $J$  = 4.5, 4.0 Hz, 1H), 5.88 – 5.74 (m, 1H), 5.10 – 4.91 (m, 2H), 3.24 – 3.02 (m, 2H), 2.86 – 2.60 (m, 1H), 2.26 – 2.05 (m, 2H), 1.99 – 1.74 (m, 2H), 1.72 – 1.55 (m, 2H), 1.54 – 1.38 (m, 1H), 1.30 (d,  $J$  = 3.0 Hz, 6H), 1.27 (d,  $J$  = 7.0 Hz, 6H).

$^{13}\text{C}$  NMR (75 MHz,  $\text{CDCl}_3$ )  $\delta$  192.8, 174.8, 147.9, 143.9, 138.6, 138.0, 136.1, 134.7, 133.0, 131.7, 127.9, 127.9, 127.4, 121.4, 121.4, 116.6, 115.3, 83.2, 47.6, 42.4, 34.7, 32.9, 31.6, 24.9, 24.8.

$^{11}\text{B}$  NMR (96 MHz,  $\text{CDCl}_3$ )  $\delta$  32.9.

HRMS (ESI): calcd for  $[\text{M}+\text{Na}]^+$   $\text{C}_{29}\text{H}_{35}\text{BN}_2\text{O}_4\text{S}$  541.2303, found: 541.2308.

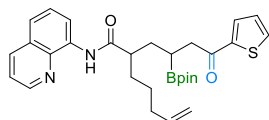

**2-(4-Oxo-2-(4,4,5,5-tetramethyl-1,3,2-dioxaborolan-2-yl)-4-(thiophen-2-yl)butyl)-N-(quinolin-8-yl)hept-6-enamide (4j) (diastereomer 1:1)**

Pentane/EA = 3:1 ( $R_f$  = 0.45), yellow oil (38.3 mg, 72% yield).

The reported dr was determined by  $^1\text{H}$  NMR analysis of purified **4j** and is consistent with that of the crude reaction mixture. The following analytical data correspond to the mixture.

$^1\text{H}$  NMR (300 MHz,  $\text{CDCl}_3$ )  $\delta$  10.04 – 9.92 (m, 1H), 8.90 – 8.67 (m, 2H), 8.14 (dt,  $J$  = 8.5, 1.5 Hz, 1H), 7.71 – 7.63 (m, 1H), 7.59 – 7.47 (m, 3H), 7.43 (ddd,  $J$  = 8.5, 4.5, 1.0 Hz, 1H), 7.06 (ddd,  $J$  = 6.5, 5.0, 4.0 Hz, 1H), 5.86 – 5.68 (m, 1H), 5.04 – 4.85 (m, 2H), 3.24 – 3.03 (m, 2H), 2.83 – 2.53 (m, 1H), 2.15 – 2.01 (m, 2H), 1.90 – 1.76 (m, 2H), 1.74 – 1.37 (m, 5H), 1.30 (s, 6H), 1.26 (d,  $J$  = 7.0 Hz, 6H).

$^{13}\text{C}$  NMR (75 MHz,  $\text{CDCl}_3$ )  $\delta$  192.8, 175.0, 147.9, 143.9, 138.6, 136.2, 134.7, 133.0, 131.7, 127.9, 127.9, 127.4, 121.5, 121.4, 116.6, 114.6, 83.2, 48.4, 42.3, 34.6, 33.8, 32.2, 26.9, 24.9, 24.8.

HRMS (ESI): calcd for  $[\text{M}+\text{H}]^+$   $\text{C}_{30}\text{H}_{37}\text{BN}_2\text{O}_4\text{S}$  533.2651, found: 533.2649.

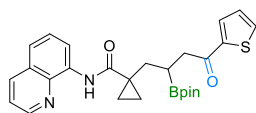

**1-(4-Oxo-2-(4,4,5,5-tetramethyl-1,3,2-dioxaborolan-2-yl)-4-(thiophen-2-yl)butyl)-N-(quinolin-8-yl)cyclopropane-1-carboxamide (4k)**

Pentane/EA = 3:1 ( $R_f$  = 0.40), yellow oil (20.7 mg, 42% yield).

**<sup>1</sup>H NMR (300 MHz, CDCl<sub>3</sub>)** δ 10.29 (s, 1H), 8.77 (dd, *J* = 4.5, 1.5 Hz, 1H), 8.70 (dd, *J* = 7.0, 2.0 Hz, 1H), 8.13 (dd, *J* = 8.5, 1.5 Hz, 1H), 7.64 (dd, *J* = 4.0, 1.5 Hz, 1H), 7.55 – 7.45 (m, 3H), 7.45 – 7.40 (m, 1H), 7.00 (dd, *J* = 5.0, 4.0 Hz, 1H), 3.56 – 3.15 (m, 2H), 2.19 (dd, *J* = 15.0, 6.5 Hz, 1H), 1.96 (dd, *J* = 15.5, 9.0 Hz, 1H), 1.85 – 1.71 (m, 1H), 1.25 (d, *J* = 2.5 Hz, 14H), 0.88 – 0.82 (m, 1H), 0.70 (ddd, *J* = 8.5, 5.5, 3.0 Hz, 1H).

**<sup>13</sup>C NMR (75 MHz, CDCl<sub>3</sub>)** δ 192.8, 172.7, 148.1, 143.9, 138.6, 136.2, 134.7, 133.0, 131.8, 127.9, 127.8, 127.4, 121.5, 121.1, 116.1, 83.2, 40.5, 34.6, 25.9, 24.9, 24.7, 15.7, 13.8.

**HRMS (ESI):** calcd for [M+H]<sup>+</sup> C<sub>27</sub>H<sub>31</sub>BN<sub>2</sub>O<sub>4</sub>S 491.2176, found: 491.2182.

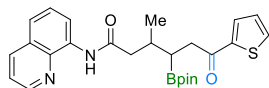

**3-Methyl-6-oxo-N-(quinolin-8-yl)-4-(4,4,5,5-tetramethyl-1,3,2-dioxaborolan-2-yl)-6-(thiophen-2-yl)hexanamide (4l) (diastereomer 1:1)**

Pentane/EA = 3:1 (*R<sub>f</sub>* = 0.38), yellow oil (30.5 mg, 64% yield).

The reported dr was determined by <sup>1</sup>H NMR analysis of purified **4l** and is consistent with that of the crude reaction mixture. The following analytical data correspond to the mixture.

**<sup>1</sup>H NMR (400 MHz, CDCl<sub>3</sub>)** δ 9.96 – 9.86 (m, 1H), 8.86 – 8.75 (m, 2H), 8.15 (dd, *J* = 8.5, 1.5 Hz, 1H), 7.72 (dt, *J* = 4.0, 1.0 Hz, 1H), 7.58 (ddd, *J* = 5.0, 3.5, 1.0 Hz, 1H), 7.55 – 7.47 (m, 2H), 7.44 (dd, *J* = 8.5, 4.0 Hz, 1H), 7.09 (ddd, *J* = 5.0, 3.5, 1.0 Hz, 1H), 3.28 – 3.04 (m, 2H), 2.84 – 2.75 (m, 1H), 2.49 – 2.34 (m, 2H), 1.71 – 1.53 (m, 1H), 1.30 (d, *J* = 3.0 Hz, 6H), 1.27 (d, *J* = 11.5 Hz, 6H), 1.14 (dd, *J* = 11.5, 6.5 Hz, 3H).

**<sup>13</sup>C NMR (100 MHz, CDCl<sub>3</sub>)** δ 193.2, 171.3, 148.1, 144.1, 138.4, 136.3, 134.6, 133.0, 131.7, 127.9, 127.9, 127.4, 121.5, 121.3, 116.4, 83.3, 44.7, 39.0, 31.9, 24.9, 24.8, 19.6.

**HRMS (ESI):** calcd for [M+Na]<sup>+</sup> C<sub>26</sub>H<sub>31</sub>BN<sub>2</sub>O<sub>4</sub>S 501.1989, found: 501.1998.

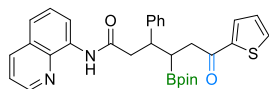

**6-Oxo-3-phenyl-N-(quinolin-8-yl)-4-(4,4,5,5-tetramethyl-1,3,2-dioxaborolan-2-yl)-6-(thiophen-2-yl)hexanamide (4m) (diastereomer >20:1)**

Pentane/EA = 3:1 (*R<sub>f</sub>* = 0.38), yellow oil (25.9 mg, 48% yield).

The reported dr was determined by <sup>1</sup>H NMR analysis of purified **4m** and is consistent with that of the crude reaction mixture.

**<sup>1</sup>H NMR (400 MHz, CDCl<sub>3</sub>)** δ 9.86 (s, 1H), 8.78 (dd, *J* = 4.5, 1.7 Hz, 1H), 8.72 (dd, *J* = 7.0, 2.0 Hz, 1H), 8.17 (d, *J* = 8.0 Hz, 1H), 7.67 (dd, *J* = 4.0, 1.0 Hz, 1H), 7.56 (dd, *J* = 5.0, 1.0 Hz, 1H), 7.53 – 7.41 (m, 3H), 7.39 – 7.33 (m, 2H), 7.27 – 7.23 (m, 2H), 7.18 – 7.10 (m, 1H), 7.07 (dd, *J* = 4.9, 3.8 Hz, 1H), 3.56 – 3.44 (m, 1H), 3.25 – 3.06 (m, 3H), 2.94 (dd, *J* = 14.5, 9.0 Hz, 1H), 2.10 – 2.01 (m, 1H), 1.14 (s, 6H), 1.08 (s, 6H).

**<sup>13</sup>C NMR (75 MHz, CDCl<sub>3</sub>)** δ 192.7, 170.4, 147.9, 144.1, 143.3, 138.4, 136.2, 134.6, 133.0, 131.7, 128.3, 128.2, 127.8, 127.3, 126.6, 121.4, 121.3, 116.5, 83.3, 44.2, 43.9, 40.1, 24.8, 24.7.

**HRMS (ESI):** calcd for [M+Na]<sup>+</sup> C<sub>31</sub>H<sub>33</sub>BN<sub>2</sub>O<sub>4</sub>S 563.2146, found: 563.2148.

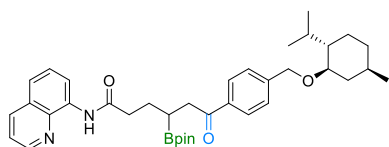

**6-(4-(((1R,2S,5R)-2-isopropyl-5-methylcyclohexyloxy)methyl)phenyl)-6-oxo-N-(quinolin-8-yl)-4-(4,4,5,5-tetramethyl-1,3,2-dioxaborolan-2-yl)hexanamide (5a)**

Pentane/EA = 3:1 (Rf = 0.38), yellow oil (42.2 mg, 67% yield).

**<sup>1</sup>H NMR (300 MHz, CDCl<sub>3</sub>)** δ 9.87 (s, 1H), 8.82 – 8.74 (m, 2H), 8.15 (dd, *J* = 8.5, 1.5 Hz, 1H), 7.96 – 7.89 (m, 2H), 7.55 – 7.47 (m, 2H), 7.46 – 7.38 (m, 3H), 4.70 (d, *J* = 12.5 Hz, 1H), 4.44 (d, *J* = 12.5 Hz, 1H), 3.26 – 3.13 (m, 3H), 2.68 (t, *J* = 8.0 Hz, 2H), 2.35 – 2.12 (m, 3H), 2.11 – 1.89 (m, 2H), 1.65 (ddd, *J* = 12.5, 6.5, 3.0 Hz, 2H), 1.57 – 1.44 (m, 1H), 1.29 (s, 6H), 1.27 (s, 6H), 0.95 – 0.90 (m, 10H), 0.73 (d, *J* = 7.0 Hz, 3H).

**<sup>13</sup>C NMR (75 MHz, CDCl<sub>3</sub>)** δ 199.7, 171.8, 148.0, 144.5, 138.4, 136.3, 136.0, 134.6, 128.1, 127.9, 127.4, 121.5, 121.3, 116.4, 83.2, 79.2, 69.7, 48.3, 41.1, 40.3, 37.7, 34.5, 31.5, 26.6, 25.6, 24.8, 24.7, 23.2, 22.3, 21.0, 16.1.

**HRMS (ESI):** calcd for [M+H]<sup>+</sup> C<sub>38</sub>H<sub>51</sub>BN<sub>2</sub>O<sub>5</sub> 627.3969, found: 627.3972.

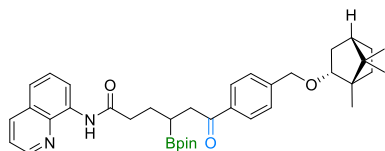

**6-Oxo-N-(quinolin-8-yl)-4-(4,4,5,5-tetramethyl-1,3,2-dioxaborolan-2-yl)-6-(4-(((1S,2R,4S)-1,7,7-trimethylbicyclo[2.2.1]heptan-2-yl)oxy)methyl)phenyl)hexanamide (5b)**

Pentane/EA = 3:1 (Rf = 0.35), yellow oil (28.0 mg, 45% yield).

**<sup>1</sup>H NMR (400 MHz, CDCl<sub>3</sub>)** δ 9.87 (s, 1H), 8.83 – 8.74 (m, 2H), 8.15 (dd, *J* = 8.0, 1.5 Hz, 1H), 7.95 – 7.90 (m, 2H), 7.54 – 7.47 (m, 2H), 7.44 (dd, *J* = 8.5, 4.0 Hz, 1H), 7.39 (d, *J* = 8.5 Hz, 2H), 4.61 (d, *J* = 13.0 Hz, 1H), 4.48 (d, *J* = 13.0 Hz, 1H), 3.69 (ddd, *J* = 9.5, 3.5, 2.0 Hz, 1H), 3.27 – 3.19 (m, 2H), 2.68 (dd, *J* = 8.5, 7.0 Hz, 2H), 2.17 – 2.02 (m, 3H), 2.01 – 1.90 (m, 1H), 1.79 – 1.64 (m, 3H), 1.55 – 1.46 (m, 1H), 1.29 (s, 6H), 1.27 (s, 6H), 1.16 – 1.03 (m, 2H), 0.91 (s, 3H), 0.85 (s, 3H), 0.83 (s, 3H).

**<sup>13</sup>C NMR (100 MHz, CDCl<sub>3</sub>)** δ 199.7, 171.8, 148.0, 144.9, 138.4, 136.3, 135.8, 134.6, 128.1, 127.9, 127.4, 126.8, 121.5, 121.3, 116.4, 84.6, 83.2, 70.9, 49.3, 47.9, 45.0, 41.1, 37.7, 36.0, 28.2, 26.7, 26.6, 24.8, 24.7, 19.7, 18.9, 14.0.

**HRMS (ESI):** calcd for [M+H]<sup>+</sup> C<sub>38</sub>H<sub>49</sub>BN<sub>2</sub>O<sub>5</sub> 625.3813, found: 625.3823.

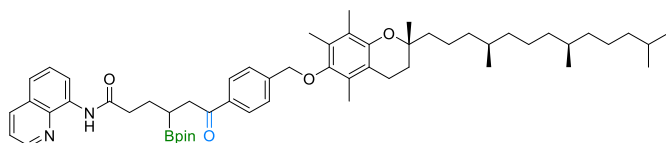

**6-Oxo-N-(quinolin-8-yl)-4-(4,4,5,5-tetramethyl-1,3,2-dioxaborolan-2-yl)-6-(4-(((R)-2,5,7,8-tetramethyl-2-((4R,8R)-4,8,12-trimethyltridecyl)chroman-6-yl)oxy)methyl)phenyl)hexanamide (5c)**

Pentane/EA = 3:1 (Rf = 0.38), yellow oil (46.2 mg, 51% yield).

**<sup>1</sup>H NMR (400 MHz, CDCl<sub>3</sub>)** δ 9.88 (s, 1H), 8.83 – 8.76 (m, 2H), 8.15 (dd, *J* = 8.5, 1.5 Hz, 1H), 8.01 – 7.96 (m, 2H), 7.58 – 7.54 (m, 2H), 7.53 – 7.47 (m, 2H), 7.45 (dd, *J* = 8.5, 4.0 Hz, 1H), 4.75 (s, 2H), 3.25 (d, *J* = 7.0 Hz, 2H), 2.70 (t, *J* = 8.0 Hz, 2H), 2.59 (t, *J* = 7.0 Hz, 2H), 2.20 (s, 3H), 2.15 (s, 3H), 2.10 (s, 3H), 2.10 – 2.01 (m, 2H), 2.00 – 1.91 (m, 1H), 1.86 – 1.74 (m, 2H), 1.57 – 1.48 (m, 4H), 1.46 – 1.34 (m, 5H), 1.30 (s, 6H), 1.28 (s, 7H), 1.25 (d, *J* = 3.5 Hz, 5H), 1.18 – 1.00 (m, 9H), 0.89 – 0.85 (m, 9H), 0.85 – 0.84 (m, 4H).

**<sup>13</sup>C NMR (100 MHz, CDCl<sub>3</sub>)** δ 199.7, 171.8, 148.0, 148.0, 143.2, 138.4, 136.3, 136.2, 134.6, 128.2, 127.9, 127.8, 127.4, 127.1, 125.8, 123.0, 121.5, 121.3, 117.7, 116.4, 83.2, 74.9, 73.9, 41.1, 40.0, 39.4, 37.7, 37.4, 37.3, 32.8, 32.8, 32.7, 31.3, 31.2, 28.0, 26.6, 24.8, 24.8, 24.4, 23.9, 22.7, 22.6, 21.0, 20.7, 19.7, 19.7, 19.6, 12.8, 12.0, 11.8.

**HRMS (ESI):** calcd for [M+H]<sup>+</sup> C<sub>57</sub>H<sub>81</sub>BN<sub>2</sub>O<sub>6</sub> 901.6266, found: 901.6267.

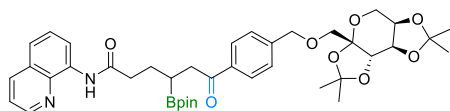

**6-Oxo-*N*-(quinolin-8-yl)-4-(4,4,5,5-tetramethyl-1,3,2-dioxaborolan-2-yl)-6-(4-(((3a*S*,5a*R*,8a*R*,8b*S*)-2,2,7,7-tetramethyltetrahydro-3a*H*-bis([1,3]dioxolo)[4,5-*b*:4',5'-*d*]pyran-3a-yl)methoxy)methyl)phenyl)hexanamide (5d)**

Pentane/EA = 3:1 (*R*<sub>f</sub> = 0.22), yellow oil (50.9 mg, 70% yield).

<sup>1</sup>H NMR (300 MHz, CDCl<sub>3</sub>) δ 9.87 (s, 1H), 8.83 – 8.73 (m, 2H), 8.15 (dd, *J* = 8.5, 1.5 Hz, 1H), 7.95 – 7.89 (m, 2H), 7.56 – 7.46 (m, 2H), 7.46 – 7.37 (m, 3H), 4.75 – 4.62 (m, 2H), 4.60 (dd, *J* = 5.5, 2.5 Hz, 1H), 4.44 (d, *J* = 2.5 Hz, 1H), 4.23 (ddd, *J* = 8.0, 2.0, 1.0 Hz, 1H), 3.92 (dd, *J* = 13.0, 2.0 Hz, 1H), 3.73 (dd, *J* = 13.0, 1.0 Hz, 1H), 3.63 (d, *J* = 1.0 Hz, 2H), 3.22 (d, *J* = 7.0 Hz, 2H), 2.68 (dd, *J* = 8.5, 7.0 Hz, 2H), 2.11 – 1.88 (m, 2H), 1.56 – 1.53 (m, 3H), 1.49 (dd, *J* = 6.5, 1.5 Hz, 1H), 1.42 (s, 3H), 1.41 (s, 3H), 1.33 (s, 3H), 1.29 (s, 6H), 1.27 (s, 6H).

<sup>13</sup>C NMR (100 MHz, CDCl<sub>3</sub>) δ 199.6, 171.8, 148.0, 143.3, 138.4, 136.3, 136.1, 134.6, 128.1, 127.9, 127.4, 127.1, 121.5, 121.3, 116.4, 108.9, 108.6, 102.6, 83.2, 73.1, 71.8, 71.0, 70.1, 70.1, 61.0, 41.1, 37.7, 26.6, 26.5, 25.8, 25.4, 24.8, 24.7, 24.0.

HRMS (ESI): calcd for [M+H]<sup>+</sup> C<sub>40</sub>H<sub>51</sub>BN<sub>2</sub>O<sub>10</sub> 731.3715, found: 731.3716.

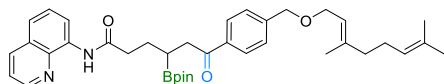

**(*E*)-6-(4-(((3,7-Dimethylocta-2,6-dien-1-yl)oxy)methyl)phenyl)-6-oxo-*N*-(quinolin-8-yl)-4-(4,4,5,5-tetramethyl-1,3,2-dioxaborolan-2-yl)hexanamide (5e)**

Pentane/EA = 3:1 (*R*<sub>f</sub> = 0.35), yellow oil (26.6 mg, 43% yield).

<sup>1</sup>H NMR (400 MHz, CDCl<sub>3</sub>) δ 9.87 (s, 1H), 8.88 – 8.69 (m, 2H), 8.15 (dd, *J* = 8.0, 1.5 Hz, 1H), 7.98 – 7.89 (m, 2H), 7.55 – 7.47 (m, 2H), 7.44 (dd, *J* = 8.5, 4.0 Hz, 1H), 7.40 (d, *J* = 8.5 Hz, 2H), 5.41 (tq, *J* = 7.0, 1.5 Hz, 1H), 5.07 (dt, *J* = 4.0, 2.5, 1.5 Hz, 1H), 4.53 (s, 2H), 4.02 (dd, *J* = 7.0, 1.0 Hz, 2H), 3.22 (d, *J* = 7.5 Hz, 2H), 2.68 (dd, *J* = 8.5, 7.0 Hz, 2H), 2.06 (d, *J* = 3.0 Hz, 5H), 1.99 – 1.91 (m, 1H), 1.76 (q, *J* = 1.0 Hz, 3H), 1.66 (d, *J* = 1.0 Hz, 3H), 1.58 (d, *J* = 1.0 Hz, 3H), 1.55 – 1.47 (m, 1H), 1.29 (s, 6H), 1.27 (s, 6H).

<sup>13</sup>C NMR (100 MHz, CDCl<sub>3</sub>) δ 199.7, 171.8, 148.0, 143.9, 141.0, 138.4, 136.3, 136.1, 134.6, 132.0, 128.2, 127.9, 127.4, 127.3, 123.7, 121.5, 121.3, 116.4, 83.2, 71.4, 66.6, 41.1, 37.7, 32.2, 26.7, 26.6, 25.7, 24.8, 24.7, 23.5, 17.6.

HRMS (ESI): calcd for [M+H]<sup>+</sup> C<sub>38</sub>H<sub>49</sub>BN<sub>2</sub>O<sub>5</sub> 625.3813, found: 625.3817.

## 6. Derivatization of β-Boryl ketones.

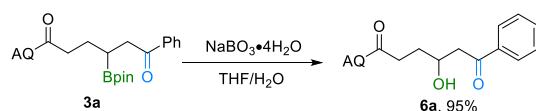

### 4-Hydroxy-6-oxo-6-phenyl-*N*-(quinolin-8-yl)hexanamide (6a)

The title compound was synthesized according to the following procedure:<sup>[1]</sup> To the boration product **3a** (229.0 mg, 0.5 mmol) in THF (2.5 mL) and water (2.5 mL) was added NaBO<sub>3</sub>·4H<sub>2</sub>O (385 mg, 5 equiv). The reaction mixture was stirred vigorously for 0.5–1 h at room temperature. The reaction mixture was quenched with water and then extracted with ethyl acetate (5 mL). The combined organic layers were washed with brine (15 mL), dried over Na<sub>2</sub>SO<sub>4</sub> and concentrated. The crude product was purified by column chromatography on silica gel to afford the corresponding product **6a** as white solid (165.2 mg, 95%)

**<sup>1</sup>H NMR (300 MHz, CDCl<sub>3</sub>)** δ 9.93 (s, 1H), 8.85 – 8.71 (m, 2H), 8.15 (dd, *J* = 8.5, 1.5 Hz, 1H), 8.00 – 7.91 (m, 2H), 7.61 – 7.42 (m, 6H), 4.44 – 4.28 (m, 1H), 3.79 (d, *J* = 2.5 Hz, 1H), 3.31 – 3.08 (m, 2H), 2.91 – 2.73 (m, 2H), 2.19 – 1.95 (m, 2H).

**<sup>13</sup>C NMR (75 MHz, CDCl<sub>3</sub>)** δ 200.5, 171.7, 148.2, 138.3, 136.6, 136.3, 134.4, 133.5, 128.6, 128.1, 127.9, 127.3, 121.6, 121.5, 116.5, 67.1, 45.2, 34.2, 31.8.

**HRMS (ESI):** calcd for [M+Na]<sup>+</sup> C<sub>21</sub>H<sub>20</sub>N<sub>2</sub>O<sub>3</sub> 371.1366, found: 371.1373.

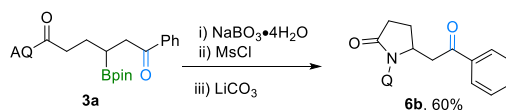

### 5-(2-Oxo-2-phenylethyl)-1-(quinolin-8-yl)pyrrolidin-2-one (6b)

In a Schlenk tube, a solution of **6b** (69.6 mg, 0.2 mmol) and triethylamine (42 μL, 0.3 mmol) in anhydrous DCM (2 mL) was cooled at 0 °C under argon. Then, methanesulfonyl chloride (20 μL, 1.3 equiv) was added dropwise, and the mixture was stirred for 1 h at 0 °C, warmed to room temperature and stirred for an additional 3 h. The reaction mixture was extracted with DCM (3 x 15 mL), and the organic phases were combined, washed with 10% aqueous HCl solution and dried over magnesium sulfate. The solvent was evaporated under reduced pressure, and the product was transferred to a Schlenk tube containing Li<sub>2</sub>CO<sub>3</sub> (30 mg, 2.0 equiv) and acetonitrile (5 mL). The reaction mixture was maintained at reflux under argon for 24 h. Then, the mixture was extracted with EtOAc (3 x 10 mL), dried over Na<sub>2</sub>SO<sub>4</sub>, filtered and concentrated under reduced pressure. The crude product was purified by column chromatography on silica gel to afford the corresponding product **6b** as brown solid (41.6 mg, 63%).

**<sup>1</sup>H NMR (300 MHz, CDCl<sub>3</sub>)** δ 8.91 (dd, *J* = 4.2, 1.8 Hz, 1H), 8.15 (dd, *J* = 8.4, 1.7 Hz, 1H), 7.79 (dd, *J* = 8.3, 1.5 Hz, 1H), 7.72 – 7.64 (m, 3H), 7.55 (dd, *J* = 8.2, 7.3 Hz, 1H), 7.51 – 7.44 (m, 1H), 7.41 (dd, *J* = 8.3, 4.2 Hz, 1H), 7.36 – 7.29 (m, 2H), 5.36 – 5.21 (m, 1H), 3.21 – 3.01 (m, 2H), 2.81 – 2.68 (m, 3H), 2.08 – 1.91 (m, 1H).

**<sup>13</sup>C NMR (75 MHz, CDCl<sub>3</sub>)** δ 197.5, 175.7, 150.4, 144.4, 136.5, 136.2, 134.6, 133.2, 130.1, 129.4, 128.5, 128.2, 127.8, 126.3, 121.6, 58.2, 43.2, 30.8, 26.0.

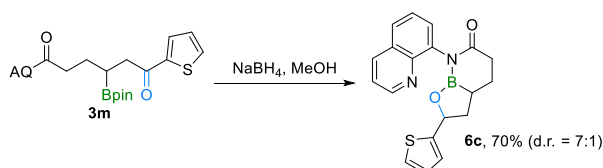

### 7-(Quinolin-8-yl)-2-(thiophen-2-yl)tetrahydro-2H-[1,2]oxaborolo[2,3-b][1,2]azaborinin-6(7H)-one

To the boration product **3m** (46.4 mg, 0.1 mmol) in MeOH (2.0 mL) was added NaBH<sub>4</sub> (5.7 mg, 1.5 equiv). The reaction mixture was stirred vigorously for 1 h at room temperature. The reaction mixture was quenched with water and then extracted with ethyl acetate (5 mL). The combined organic layers were washed with brine (15 mL), dried over Na<sub>2</sub>SO<sub>4</sub> and concentrated. The crude product was purified by column chromatography on silica gel to afford the corresponding product **6c** as bright yellow solid (24.4 mg, 70%).

**<sup>13</sup>C NMR (75 MHz, CDCl<sub>3</sub>)** δ 175.7, 149.6, 140.3, 139.9, 139.8, 137.0, 132.1, 127.3, 126.3, 123.7, 122.7, 122.4, 118.1, 117.4, 75.6, 42.4, 33.4, 28.4.

**<sup>11</sup>B NMR (96 MHz, CDCl<sub>3</sub>)** δ 12.1.

**HRMS (ESI):** calcd for [M+H]<sup>+</sup> C<sub>19</sub>H<sub>19</sub>BN<sub>2</sub>O<sub>3</sub>S 349.1185, found: 349.1182.

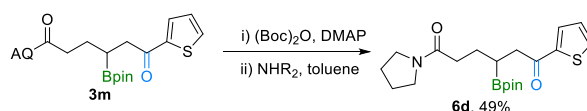

### 6-(Pyrrolidin-1-yl)-3-(4,4,5,5-tetramethyl-1,3,2-dioxaborolan-2-yl)-1-(thiophen-2-yl)hexane-1,6-dione (6d)

The title compound was synthesized according to the following procedure:<sup>[2]</sup> To a 25-mL round-bottom flask containing a Teflon-coated magnetic stir bar, were added 3m (46.4 mg, 0.1 mmol), DMAP (10 mol%), and Boc anhydride (2 equiv). The reaction flask was evacuated and backfilled with N<sub>2</sub>, followed by addition of anhydrous MeCN (0.1 M). The reaction mixture was heated at 60 °C for 2 h. After cooling to room temperature, the reaction was concentrated under vacuum and purified by column chromatography (pentane:EtOAc = 1:1) to afford the Bocprotected amide. The Boc amide was then dissolved in toluene (0.5 M), followed by addition of pyrrolidine (1.5 equiv). The reaction mixture was heated under N<sub>2</sub> atmosphere at 60 °C overnight. Upon completion, the organic mixture was concentrated under vacuum and purified by column chromatography (pentane:EtOAc = 1:1) to afford pure product.

<sup>1</sup>H NMR (300 MHz, CDCl<sub>3</sub>) δ 7.68 (dd, *J* = 3.8, 1.1 Hz, 1H), 7.56 (dd, *J* = 5.0, 1.2 Hz, 1H), 7.07 (dd, *J* = 5.0, 3.8 Hz, 1H), 3.45 – 3.34 (m, 4H), 3.08 (d, *J* = 7.1 Hz, 2H), 2.42 – 2.23 (m, 2H), 1.96 – 1.71 (m, 6H), 1.47 – 1.32 (m, 1H), 1.21 (s, 6H), 1.20 (s, 6H).

<sup>13</sup>C NMR (75 MHz, CDCl<sub>3</sub>) δ 193.0, 171.5, 144.0, 133.0, 131.7, 127.9, 83.0, 46.5, 45.5, 41.5, 34.1, 26.0, 25.8, 24.7, 24.7, 24.3.

HRMS (ESI): calcd for [M+H]<sup>+</sup> C<sub>20</sub>H<sub>30</sub>BNO<sub>4</sub>S 392.2070, found: 392.2069.

## 7. References

- [1] J.-E. Lee, J. Yun, *Angew. Chem. Int. Ed.* **2008**, *47*, 145.
- [2] O. Verho, M. P. Lati, M. Oshmann, *J. Org. Chem.* **2018**, *83*, 4464.
- [3] J. Jeon, H. Ryu, C. Lee, D. Cho, M.-H. Baik, S. Hong, *J. Am. Chem. Soc.* **2019**, *141*, 10048.
- [4] M. J. Kier, R. M. Leon, N. F. O'Rourke, A. L. Rheingold, G. C. Micalizio, *J. Am. Chem. Soc.* **2017**, *139*, 12374.
- [5] J.-C. Wu, L. -B. Gong, Y. Xia, R.-J. Song, Y.-X. Xie, J.-H. Li, *Angew. Chem. Int. Ed.* **2012**, *51*, 9909.

## 8. NMR Spectra of the Alkenes and $\beta$ -boryl ketones

### 8.1 NMR spectra of the alkenes.

210108.f346.10.fid — Fupeng Wu 2-y-1 — PROTON CDCl<sub>3</sub> {C:\Bruker\TopSpin3.6.2} 2101 46 — 300.20MHz

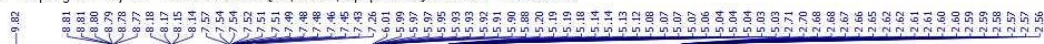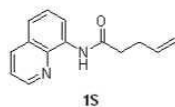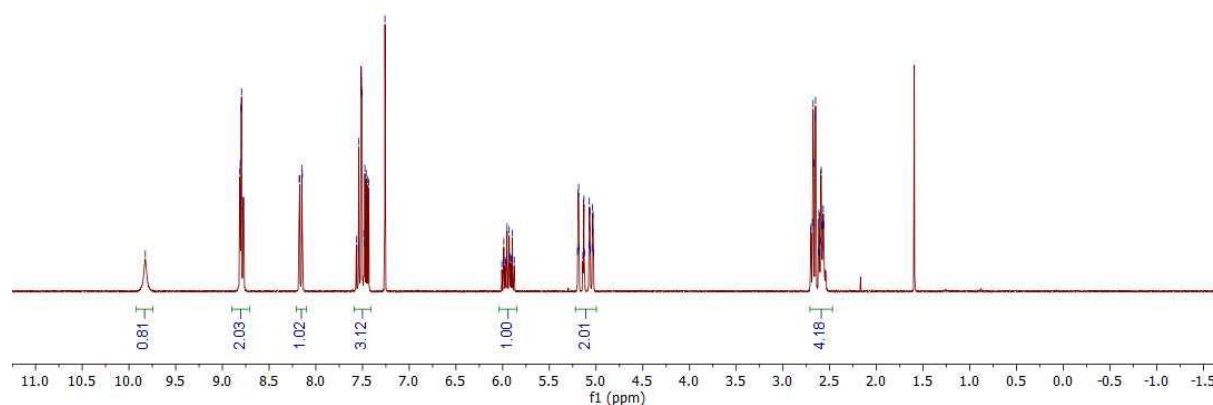

210108.f346.11.fid — Fupeng Wu 2-y-1 — C13CPD CDCl<sub>3</sub> {C:\Bruker\TopSpin3.6.2} 2101 46 — 75.49MHz

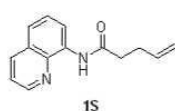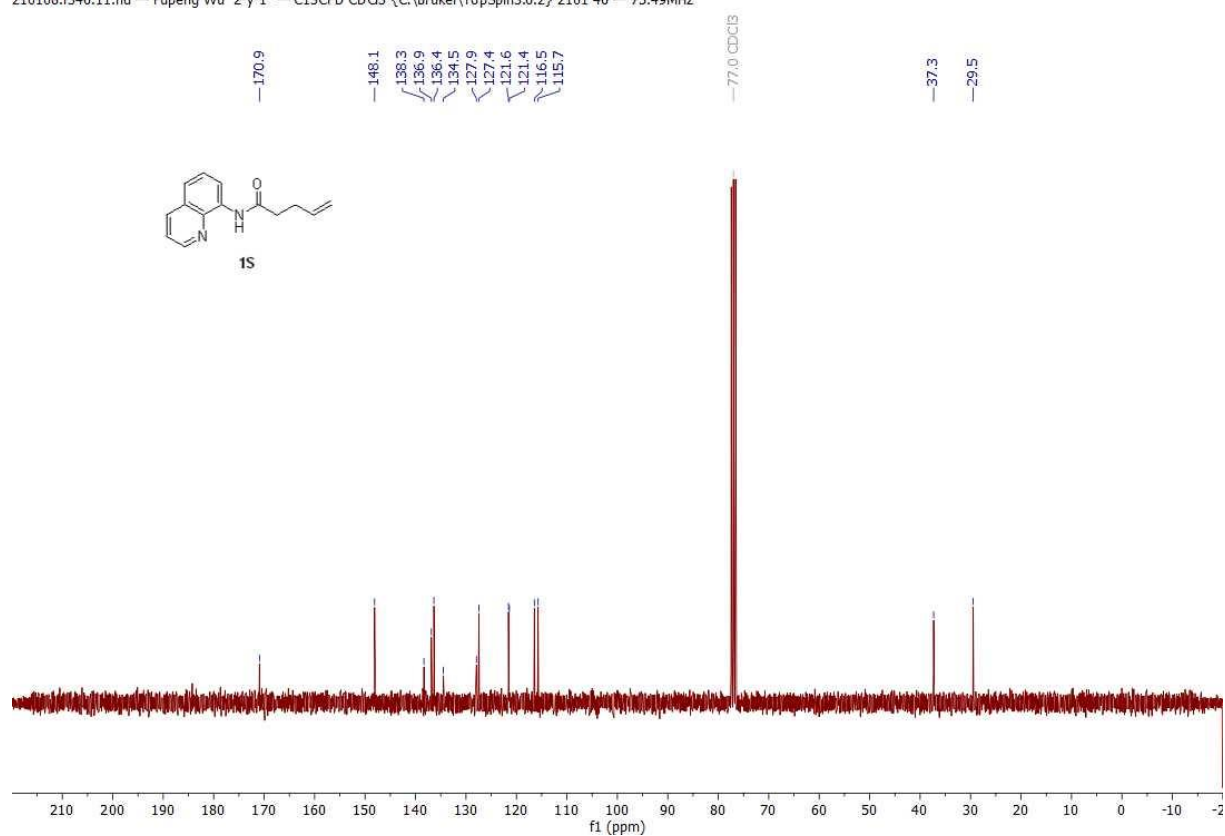

210308.f351.10.fid — Fupeng Wu Q-y-7 — PROTON CDCl3 {C:\Bruker\TopSpin3.6.2} 2103 51 — 300.20MHz

9.80 8.84 8.84 8.82 8.82 8.81 8.81 8.80 8.79 8.16 8.15 8.13 8.13 7.53 7.53 7.50 7.49 7.49 7.46 7.46 7.45 7.43 7.42 7.26 7.26 7.02 7.01 7.01 6.88 6.88 6.86 6.85 6.84 6.83 6.80 6.80 6.17 6.16 6.16 6.15 6.15 5.11 5.11 5.10 5.10 5.10 5.00 5.00 5.00 4.99 4.99 4.97 4.97 4.96 4.96 4.96 2.56 2.53 2.53 2.50 2.50 2.47 2.47 2.46 2.46 2.45 2.45 2.44 2.44 2.43 2.43 2.32 2.32 2.31 2.31 2.29 2.29 2.26 2.26 2.09 2.09 2.07 2.06 2.05 2.04 2.02 2.02 1.07 1.07 1.06 1.06

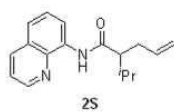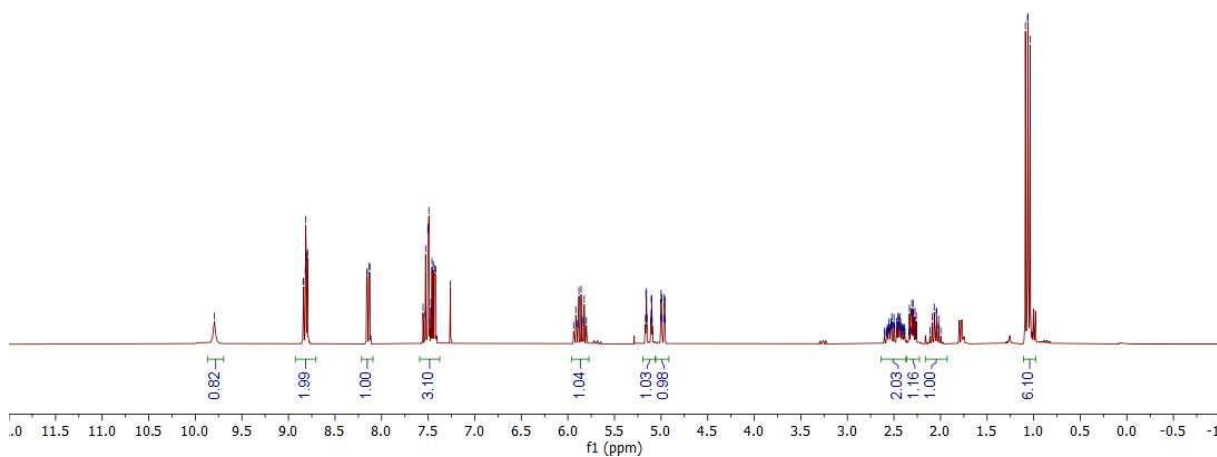

210308.f351.11.fid — Fupeng Wu Q-y-7 — C13CPD CDCl3 {C:\Bruker\TopSpin3.6.2} 2103 51 — 75.49MHz

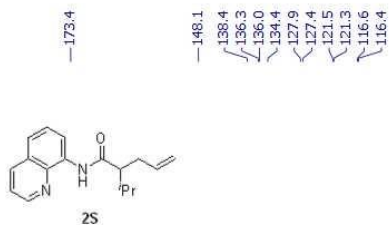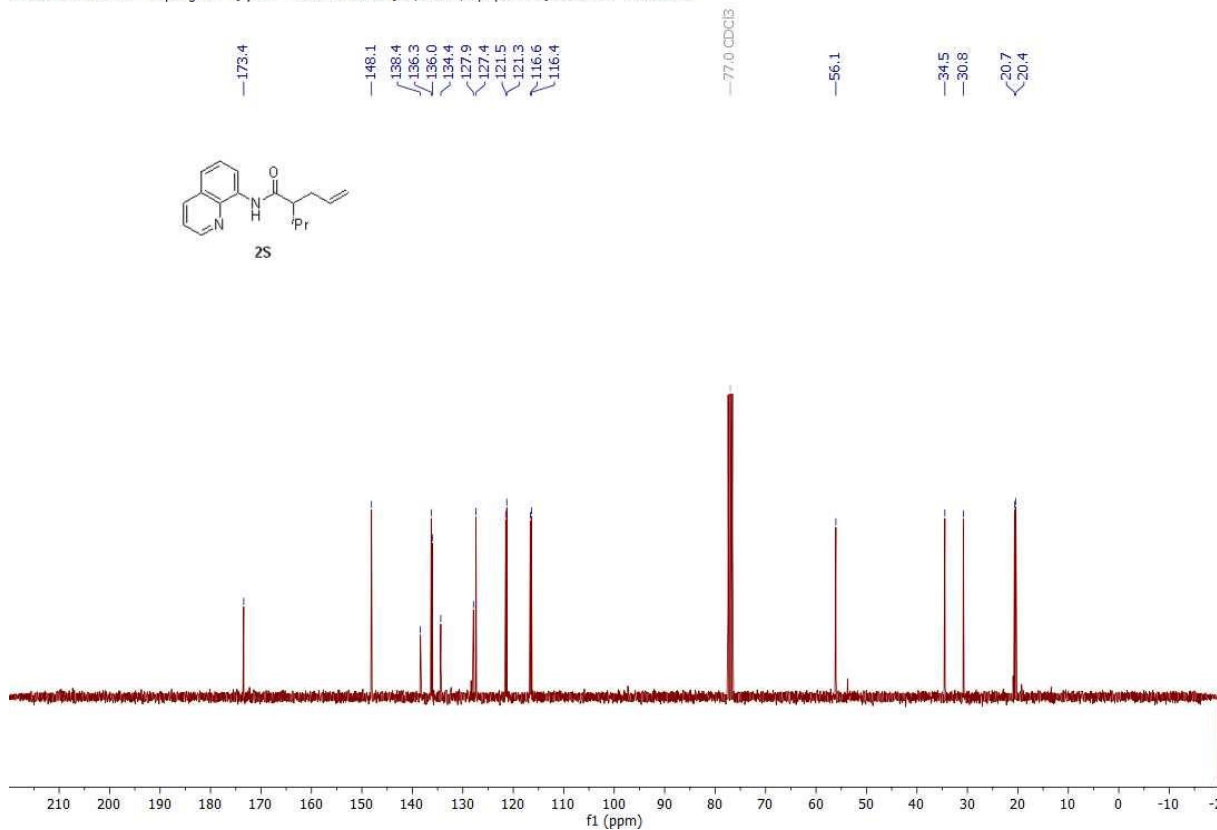



210308.f354.10.fid — Fupeng Wu Q-y-8 — PROTON CDCl<sub>3</sub> {C:\Bruker\TopSpin3.6.2} 2103 54 — 300.20MHz

9.85 8.85 8.84 8.82 8.81 8.79 8.78 8.77 8.11 8.10 8.09 7.54 7.51 7.51 7.48 7.47 7.46 7.42 7.42 7.40 7.38 7.38 5.87 5.84 5.83 5.82 5.80 5.79 5.76 5.76 5.11 5.11 5.07 5.07 5.04 5.04 5.03 5.03 5.02 5.01 5.01 5.01 5.00 5.00 4.99 4.98 4.97 4.97 2.60 2.59 2.58 2.58 2.57 2.57 2.56 2.56 2.35 2.35 2.20 2.20 2.17 2.17 2.15 2.14 1.92

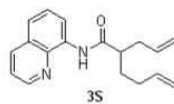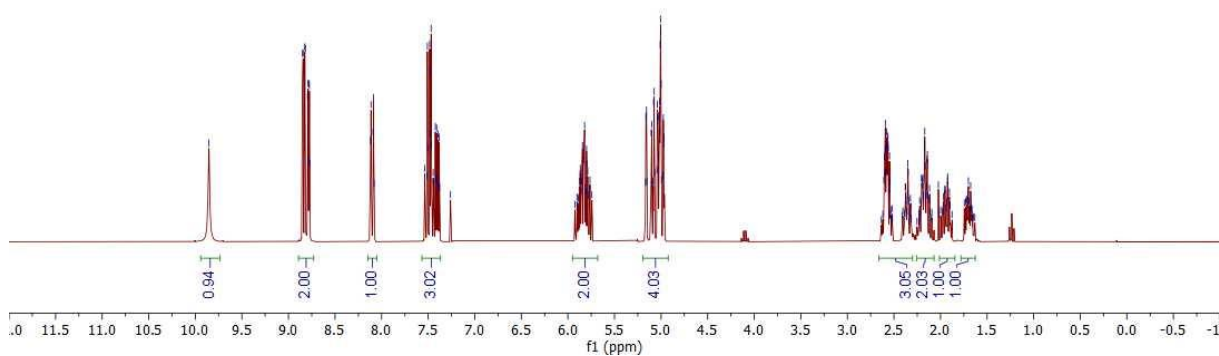

210308.f354.11.fid — Fupeng Wu Q-y-8 — C13CPD CDCl<sub>3</sub> {C:\Bruker\TopSpin3.6.2} 2103 54 — 75.49MHz

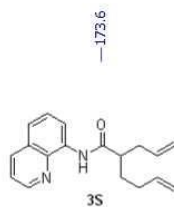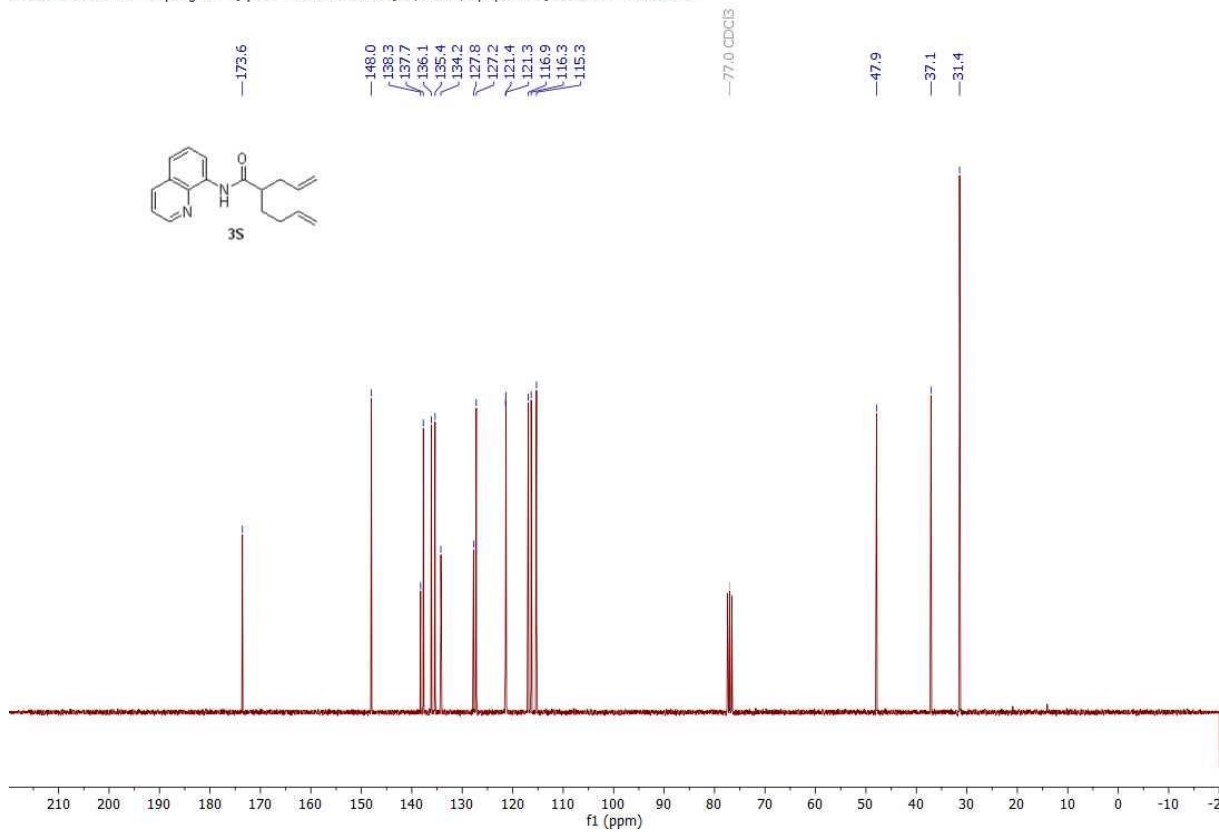



210318.f346.10.fid — Fupeng Wu Q-y-35 — PROTON CDCl3 {C:\Bruker\TopSpin3.6.2} 2103 46 — 300.20MHz

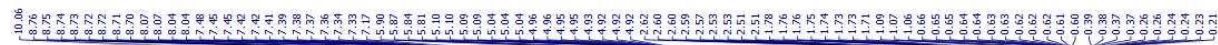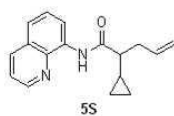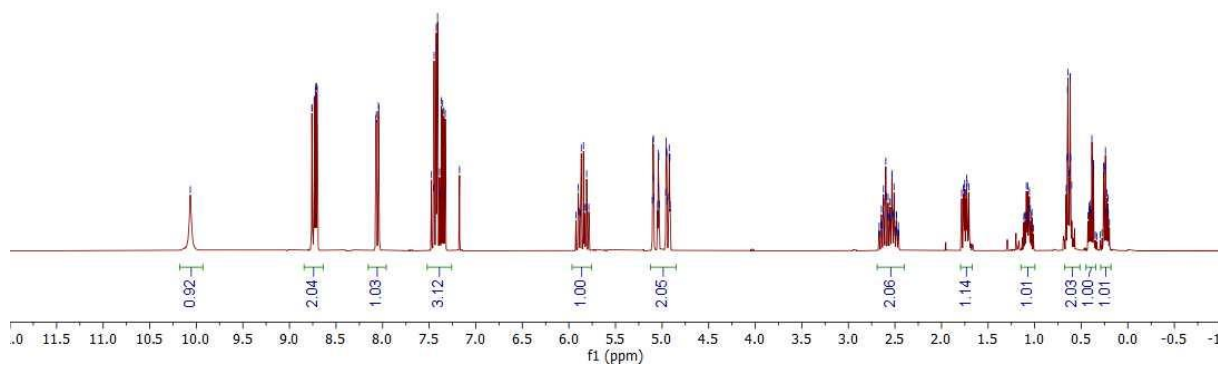

210318.f346.11.fid — Fupeng Wu Q-y-35 — C13CPD CDCl3 {C:\Bruker\TopSpin3.6.2} 2103 46 — 75.49MHz

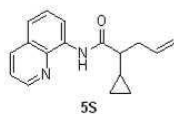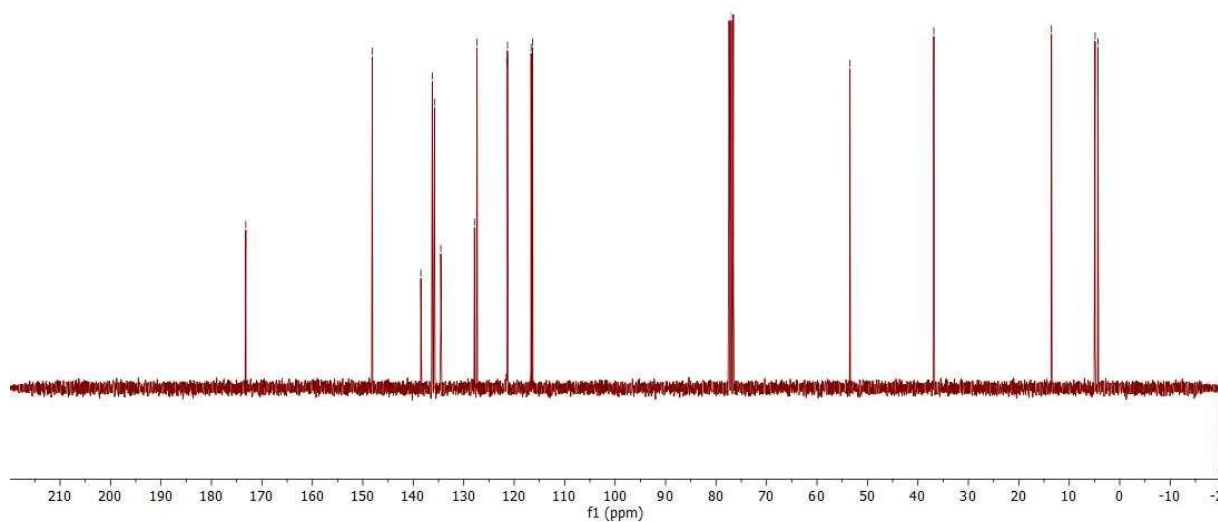

210318.f345.10.fid — Fupeng Wu Q-y-34 — PROTON CDCl3 {C:\Bruker\TopSpin3.6.2} 2103 45 — 300.20MHz

9.85 8.83 8.83 8.82 8.82 8.81 8.81 8.80 8.80 8.17 8.16 8.14 8.14 7.56 7.53 7.51 7.50 7.48 7.47 7.44 7.43 7.26 5.87 5.85 5.85 5.83 5.82 5.77 5.74 5.74 5.16 5.16 5.11 5.10 5.10 5.04 5.04 5.04 5.03 5.03 5.02 5.02 5.01 5.01 5.00 5.00 4.97 4.97 4.96 4.95 4.95 4.94 4.94 4.91 4.91 4.91 4.91 2.57 2.57 2.56 2.56 2.55 2.55 2.54 2.54 2.36 2.36 2.13 2.11 2.11 2.09 2.09 2.08 2.08 2.06 2.06 1.54 1.54 1.52 1.52 1.51 1.51 1.50 1.50

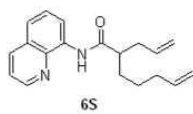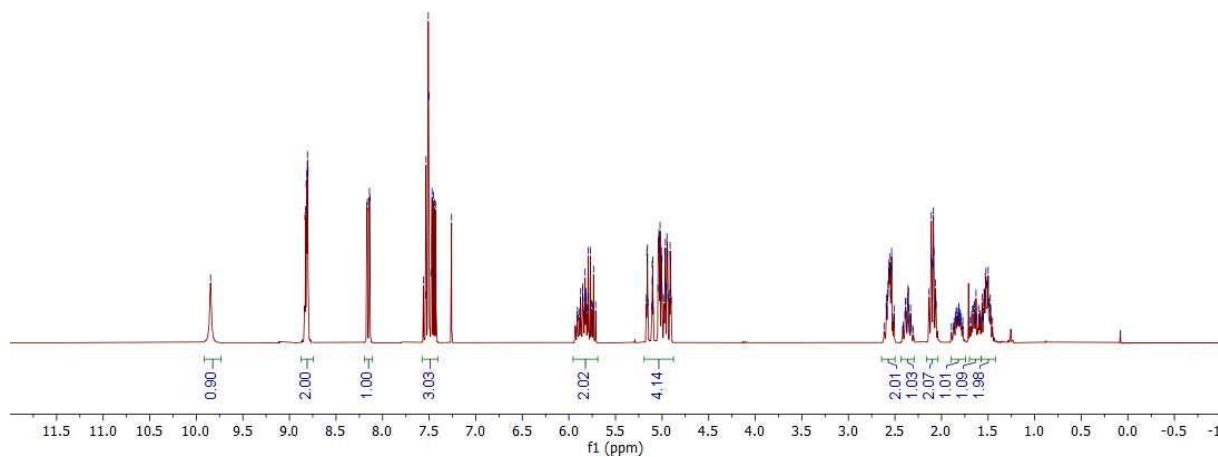

210318.f345.11.fid — Fupeng Wu Q-y-34 — C13CPD CDCl3 {C:\Bruker\TopSpin3.6.2} 2103 45 — 75.49MHz

173.9 148.1 138.4 136.3 135.6 134.4 127.9 127.4 121.5 116.9 116.5 114.7 -77.0 CDCl3 48.8 37.2 33.7 32.0 26.7

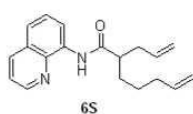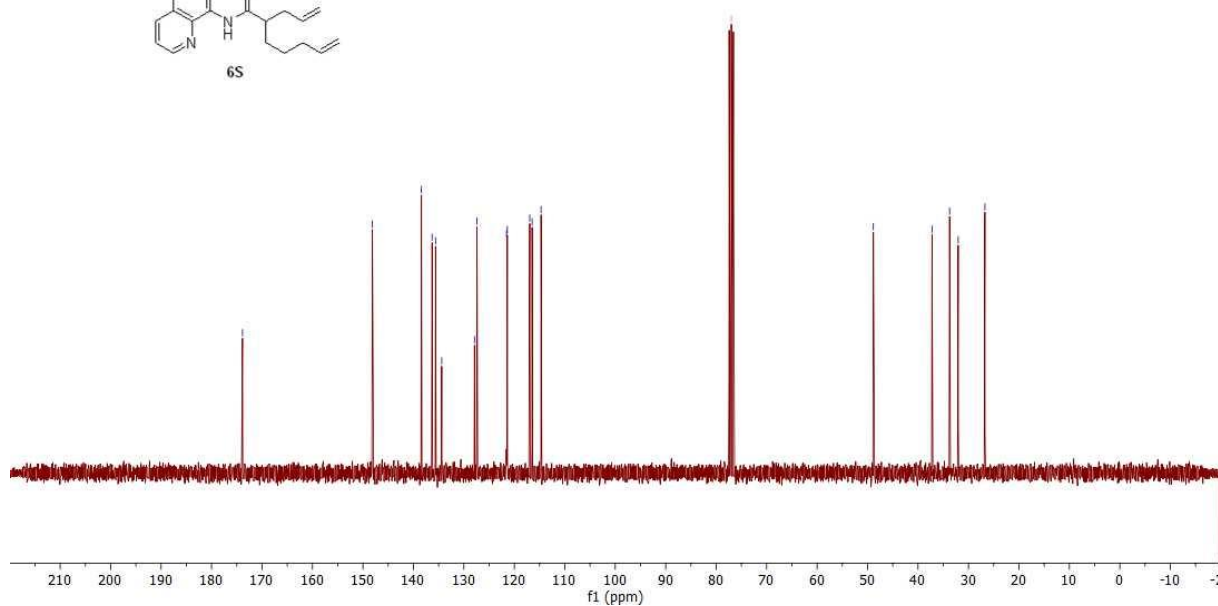

210419.f327.10.fid — Fupeng Wu Q-y-19 — PROTON CDCl<sub>3</sub> {C:\Bruker\TopSpin3.6.2} 2104 27 — 300.20MHz

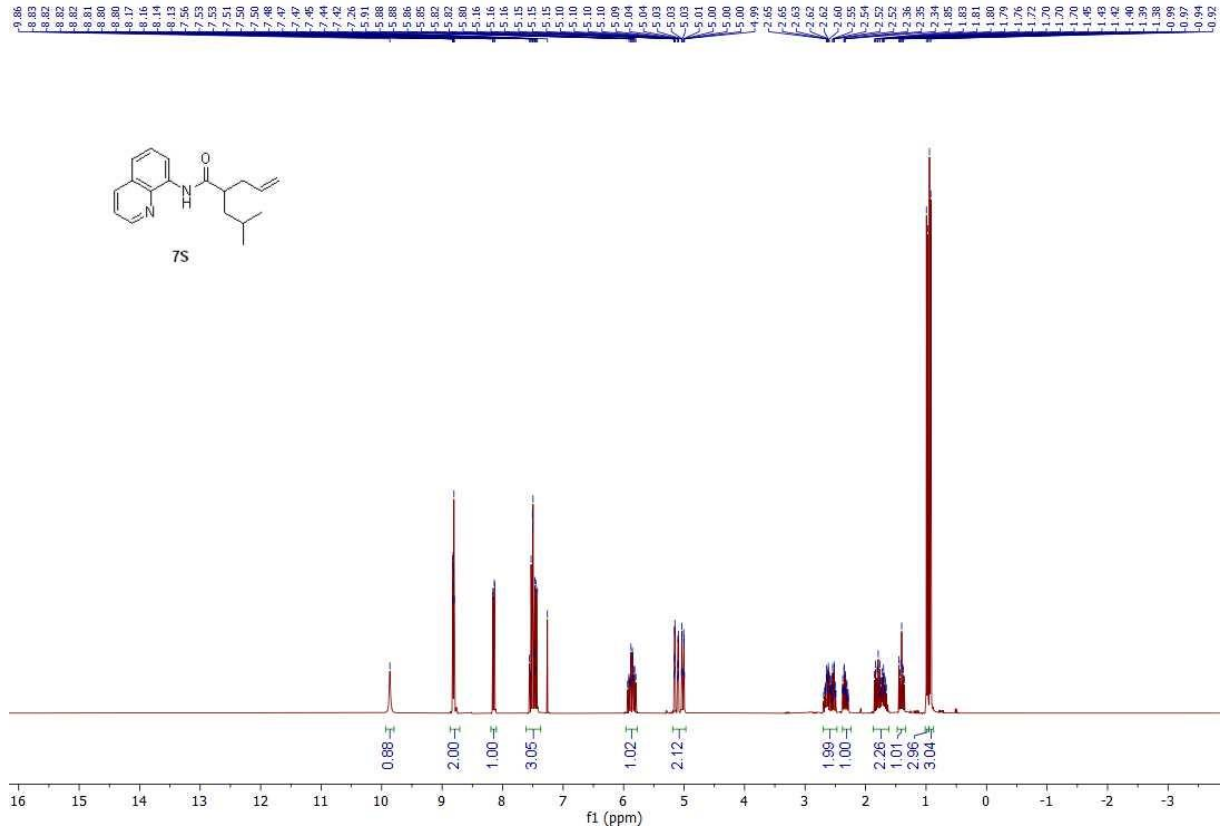

210419.f327.11.fid — Fupeng Wu Q-y-19 — C13CPD CDCl<sub>3</sub> {C:\Bruker\TopSpin3.6.2} 2104 27 — 75.49MHz

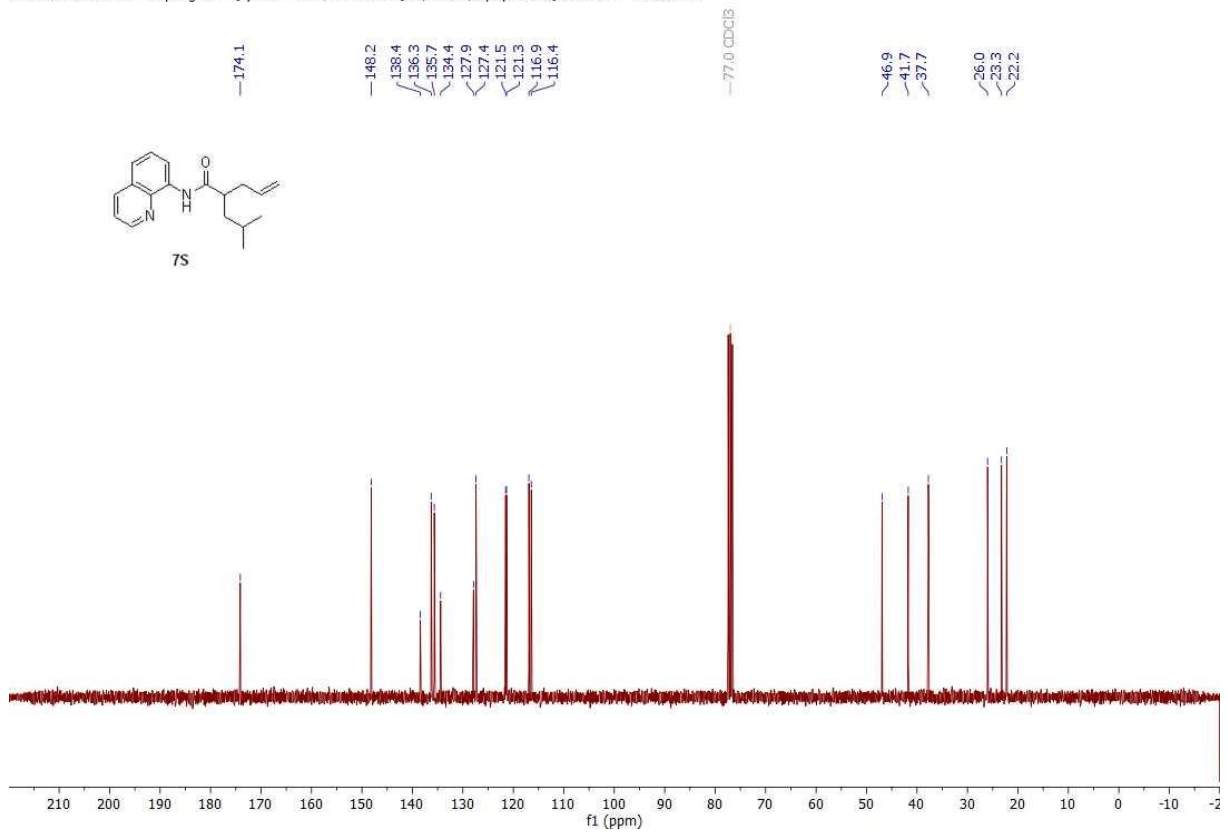

210303.f373.10.fid — Fupeng Wu Q-y-4 — PROTON CDCl3 {C:\Bruker\TopSpin3.6.2} 2103 13 — 300.20MHz

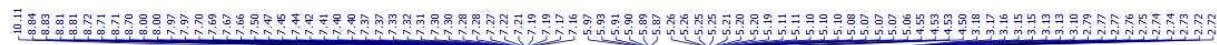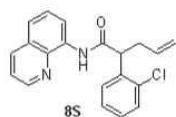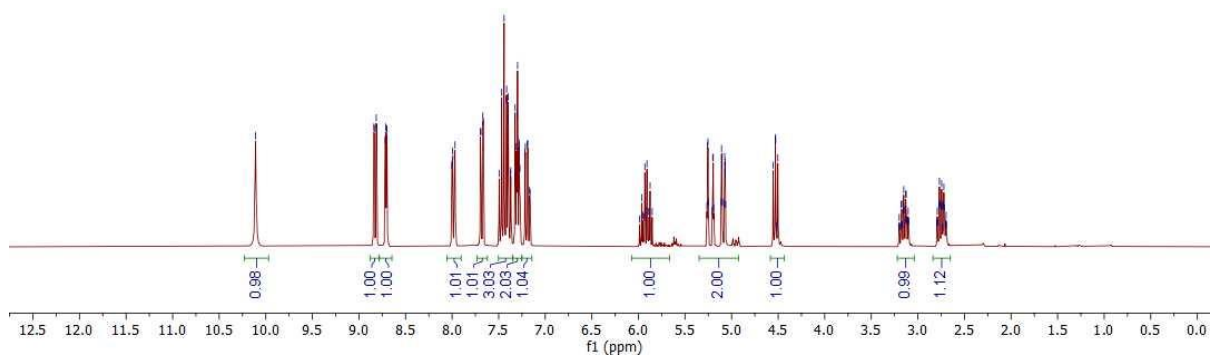

210303.f373.11.fid — Fupeng Wu Q-y-4 — C13CPD CDCl3 {C:\Bruker\TopSpin3.6.2} 2103 13 — 75.49MHz

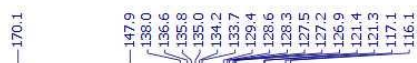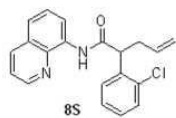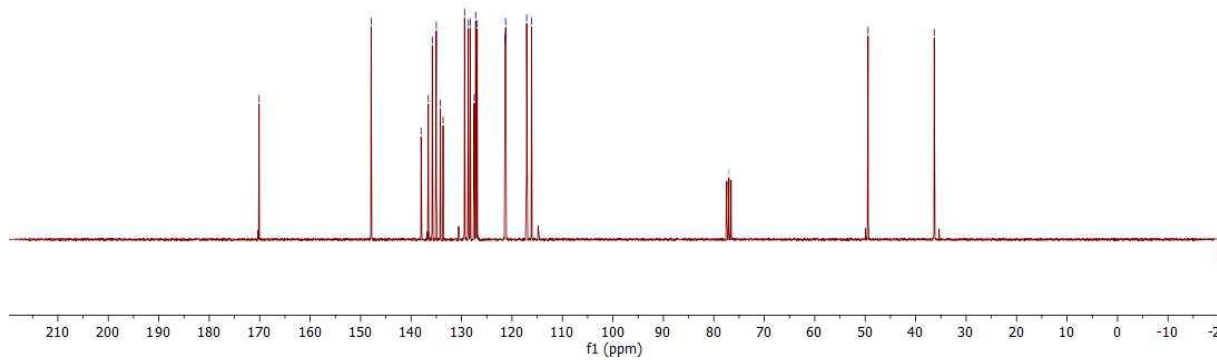

210419.f324.10.fid — Fupeng Wu Q-y-5 — PROTON CDCl3 {C:\Bruker\TopSpin3.6.2} 2104 24 — 300.20MHz

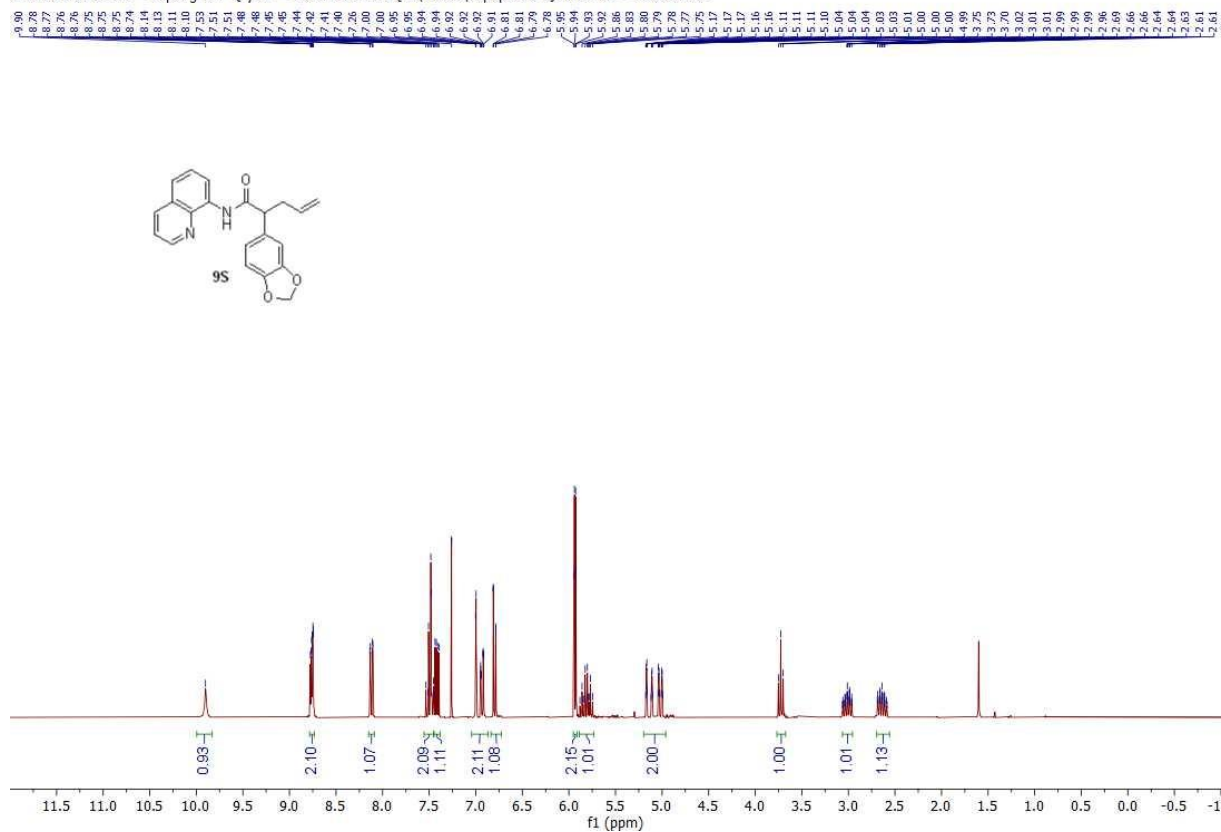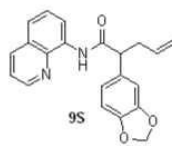

210308.f346.11.fid — Fupeng Wu Q-y-5 — C13CPD CDCl3 {C:\Bruker\TopSpin3.6.2} 2103 46 — 75.49MHz

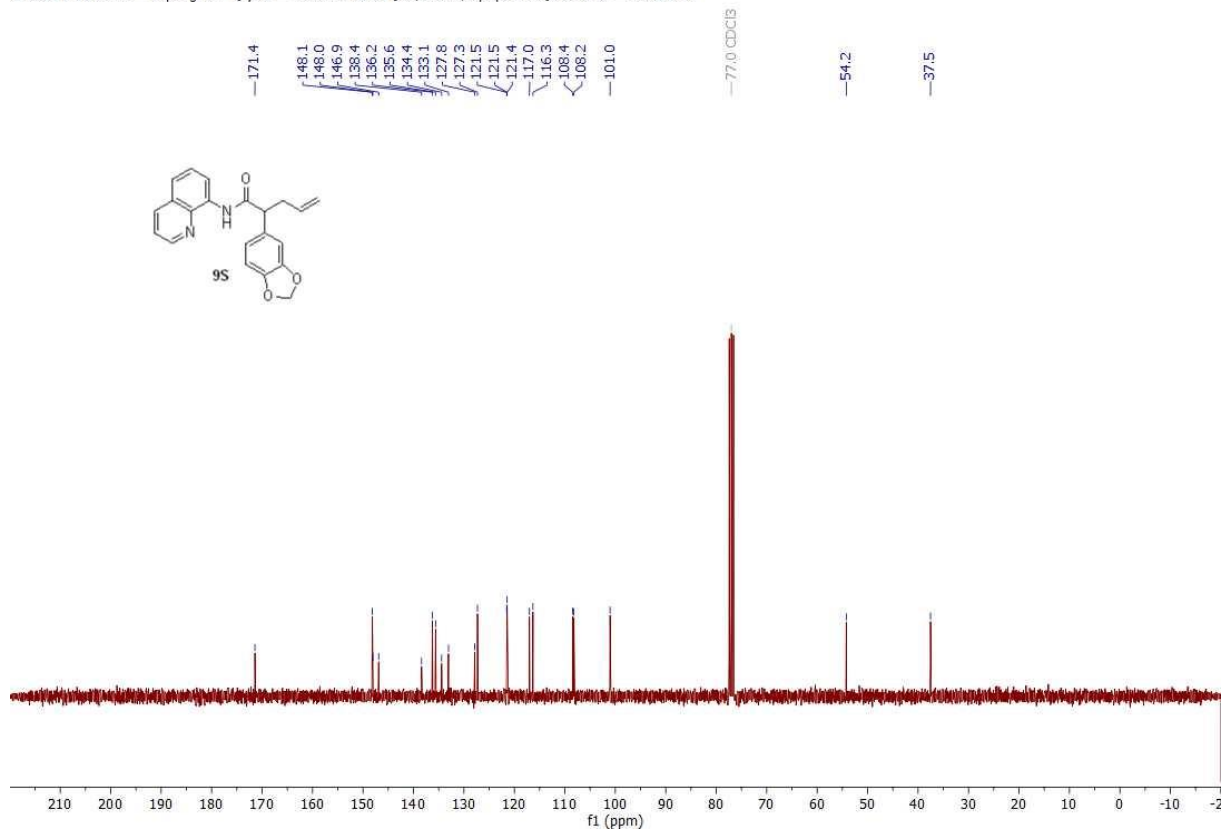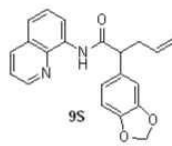





210308.f355.10.fid — Fupeng Wu Q-y-16 — PROTON CDCl3 {C:\Bruker\TopSpin3.6.2} 2103 55 — 300.20MHz

9.93 8.81 8.80 8.78 8.72 8.72 8.72 8.71 8.09 8.06 8.06 7.53 7.52 7.51 7.50 7.50 7.49 7.49 7.47 7.46 7.46 7.43 7.42 7.41 7.41 7.40 7.40 7.39 7.38 7.37 7.36 7.36 7.35 7.35 7.32 7.31 7.31 7.29 7.29 7.26 7.26 5.90 5.87 5.84 5.81 5.20 5.20 5.19 5.15 5.14 5.13 5.13 5.06 5.06 5.05 5.05 5.03 5.02 5.02 5.02 5.01 5.01 3.89 3.81 3.81 3.13 3.12 3.12 3.11 3.10 3.10 3.08 3.08 3.07 3.07 2.74 2.73 2.71 2.71 2.69

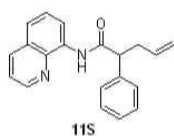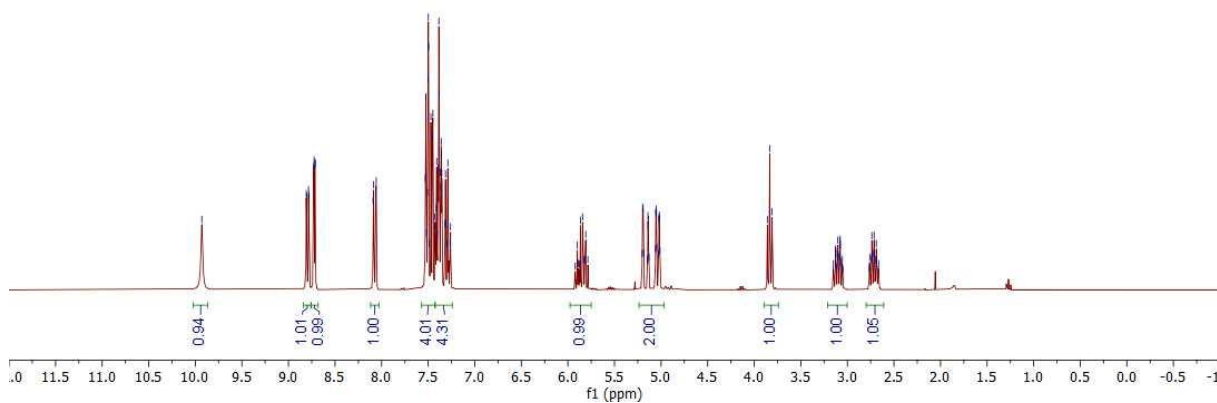

210308.f355.11.fid — Fupeng Wu Q-y-16 — C13CPD CDCl3 {C:\Bruker\TopSpin3.6.2} 2103 55 — 75.49MHz

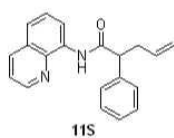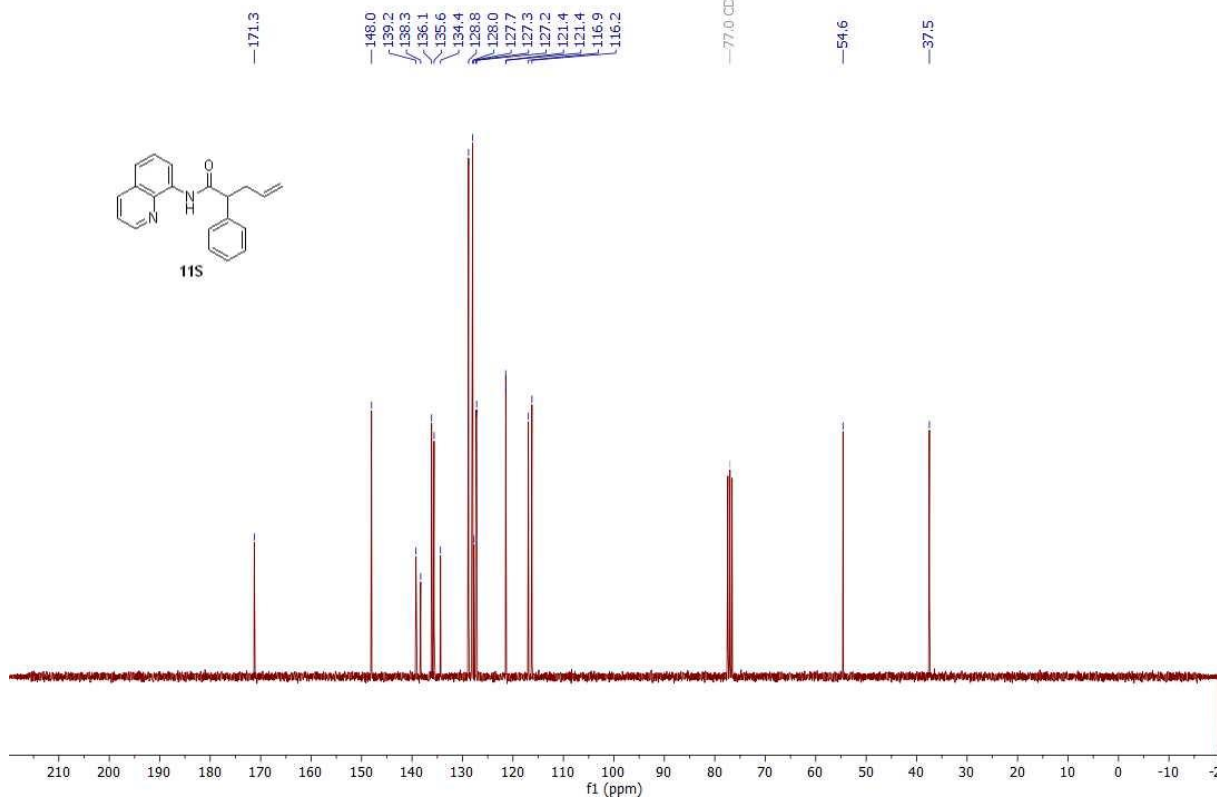

210308.f352.10.fid — Fupeng Wu Q-y-18 — PROTON CDCl<sub>3</sub> {C:\Bruker\TopSpin3.6.2} 2103 52 — 300.20MHz

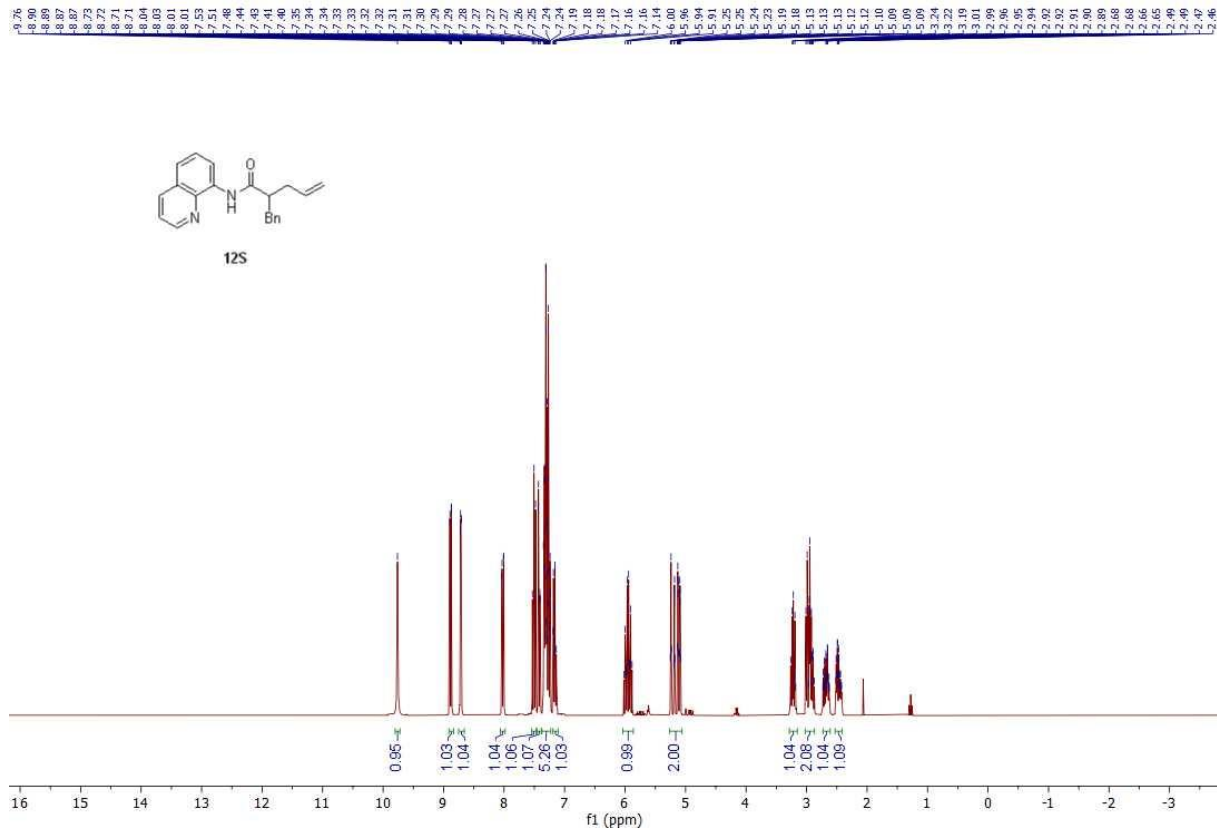

210308.f352.11.fid — Fupeng Wu Q-y-18 — C13CPD CDCl<sub>3</sub> {C:\Bruker\TopSpin3.6.2} 2103 52 — 75.49MHz

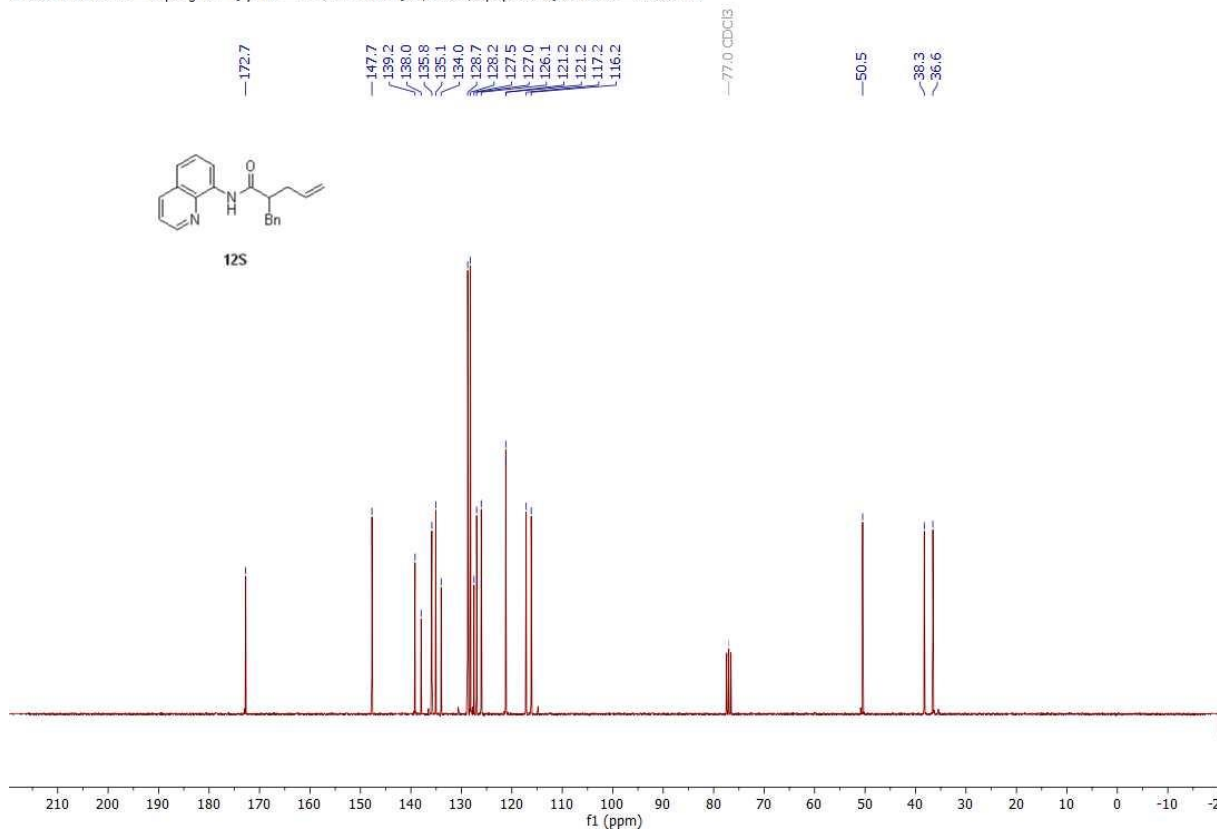

210312.f375.10.fid — Fupeng Wu Q-y-9 — PROTON CDCl3 {C:\Bruker\TopSpin3.6.2} 2103 15 — 300.20MHz

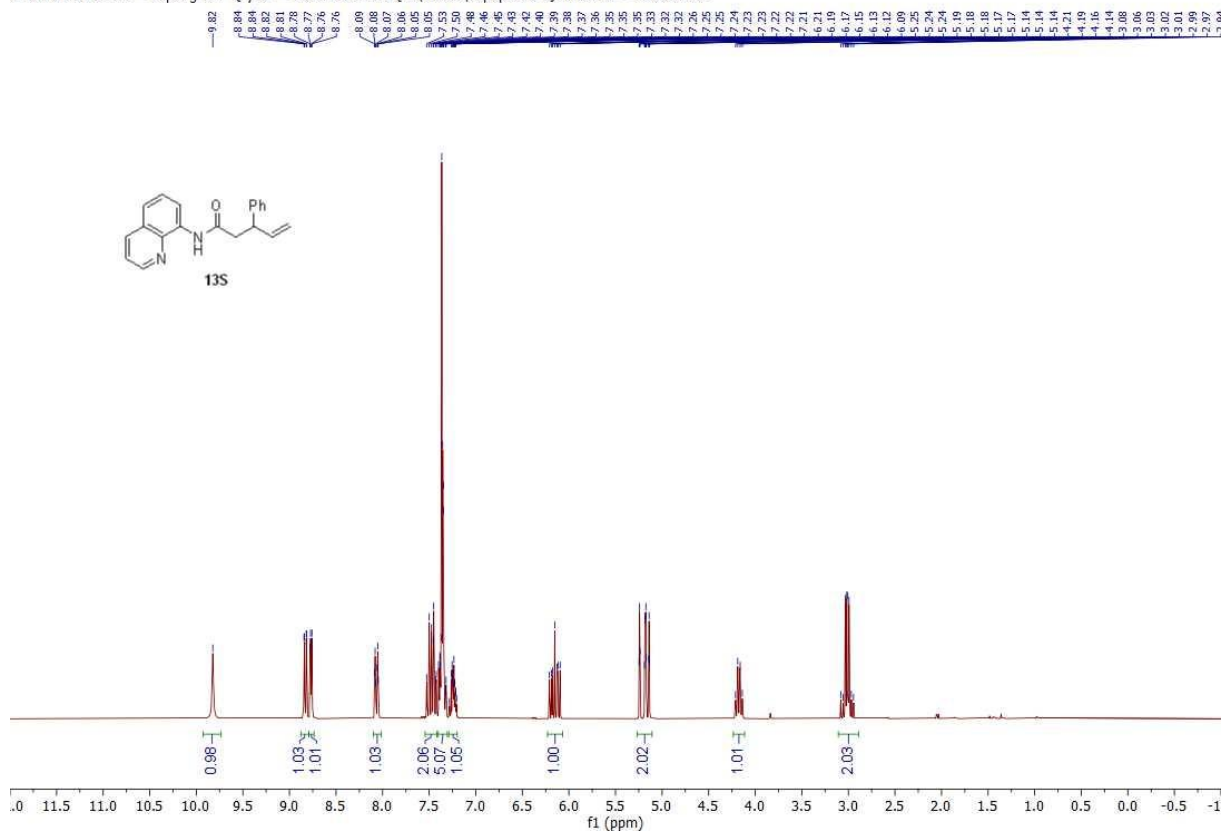

210312.f375.11.fid — Fupeng Wu Q-y-9 — C13CPD CDCl3 {C:\Bruker\TopSpin3.6.2} 2103 15 — 75.49MHz

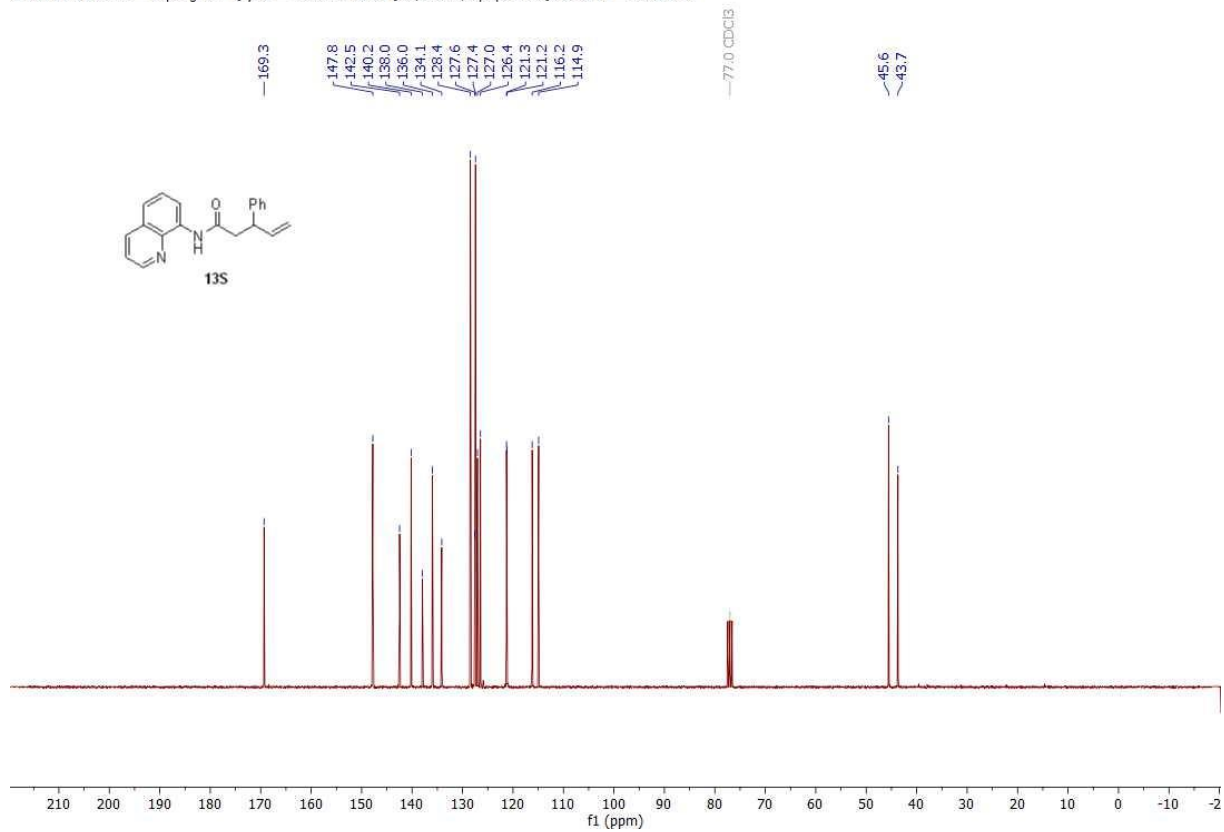

210312.f376.10.fid — Fupeng Wu Q-y-30 — PROTON CDCl3 {C:\Bruker\TopSpin3.6.2} 2103 16 — 300.20MHz

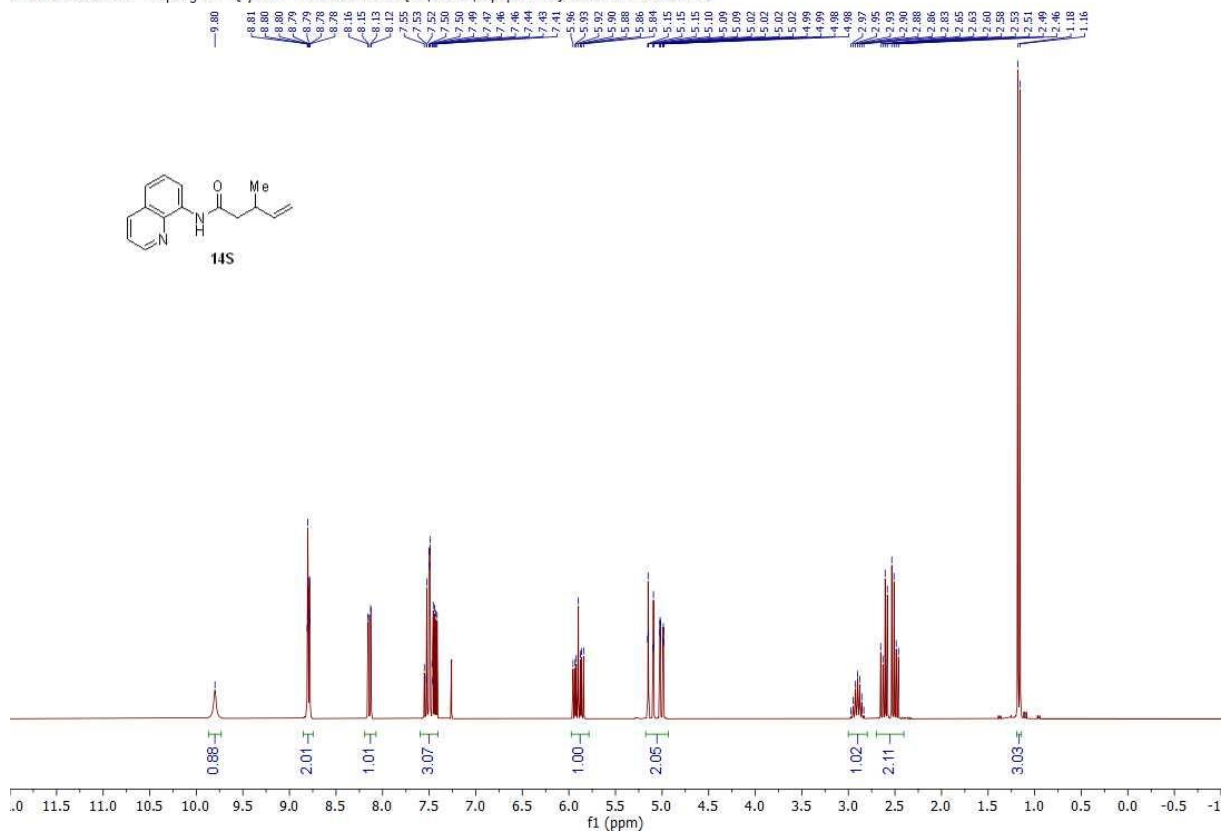

210312.f376.11.fid — Fupeng Wu Q-y-30 — C13CPD CDCl3 {C:\Bruker\TopSpin3.6.2} 2103 16 — 75.49MHz

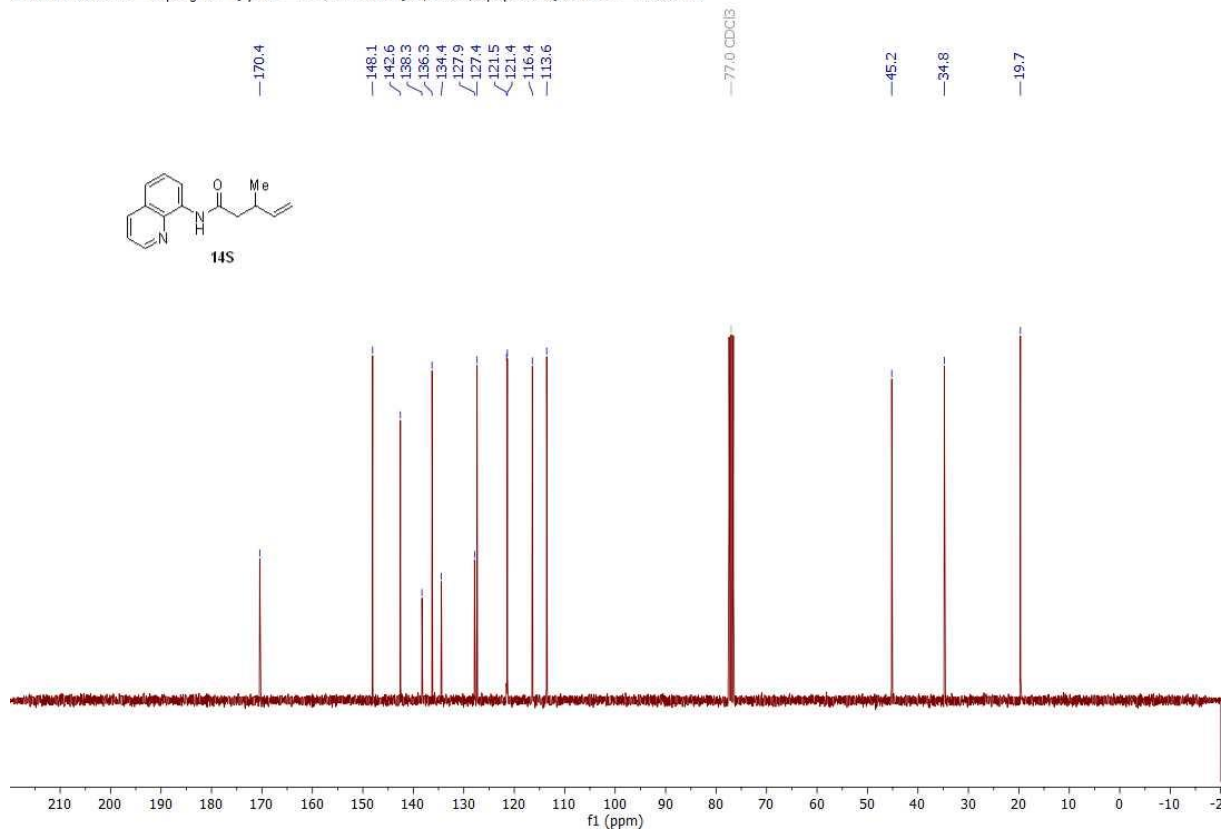

210618.448.10.fid — Fupeng Wu Q-y-Cl — Au1H CDCl3 {C:\Bruker\TopSpin3.5pl6} 2106 48 — 400.13MHz

9.76, 8.83, 8.82, 8.82, 8.81, 8.72, 8.70, 8.64, 8.53, 8.52, 7.58, 7.56, 7.55, 7.54, 7.53, 7.52, 5.97, 5.96, 5.95, 5.94, 5.92, 5.91, 5.89, 5.87, 5.87, 5.18, 5.17, 5.17, 5.14, 5.13, 5.13, 5.13, 5.07, 5.06, 5.06, 5.06, 5.04, 5.04, 5.03, 5.03, 2.68, 2.68, 2.66, 2.66, 2.64, 2.64, 2.64, 2.59, 2.59, 2.59, 2.58, 2.58, 2.57, 2.57, 2.56, 2.56, 2.55, 2.55, 2.55, 2.55, 2.55, 2.55

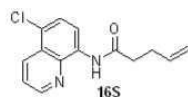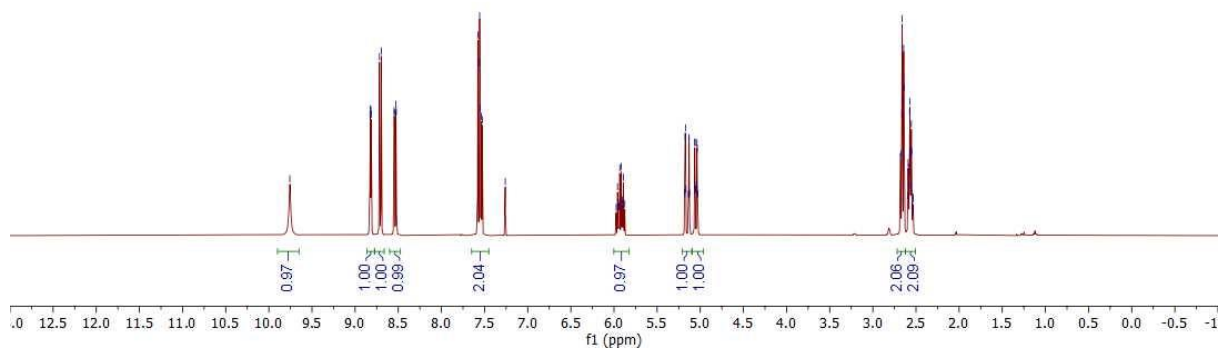

210618.448.11.fid — Fupeng Wu Q-y-Cl — Au13C CDCl3 {C:\Bruker\TopSpin3.5pl6} 2106 48 — 100.63MHz

170.9, 148.5, 138.8, 136.7, 133.7, 133.4, 127.2, 125.8, 124.1, 122.2, 116.3, 115.8, 77.0 CDCl3, 37.2, 29.3

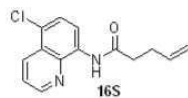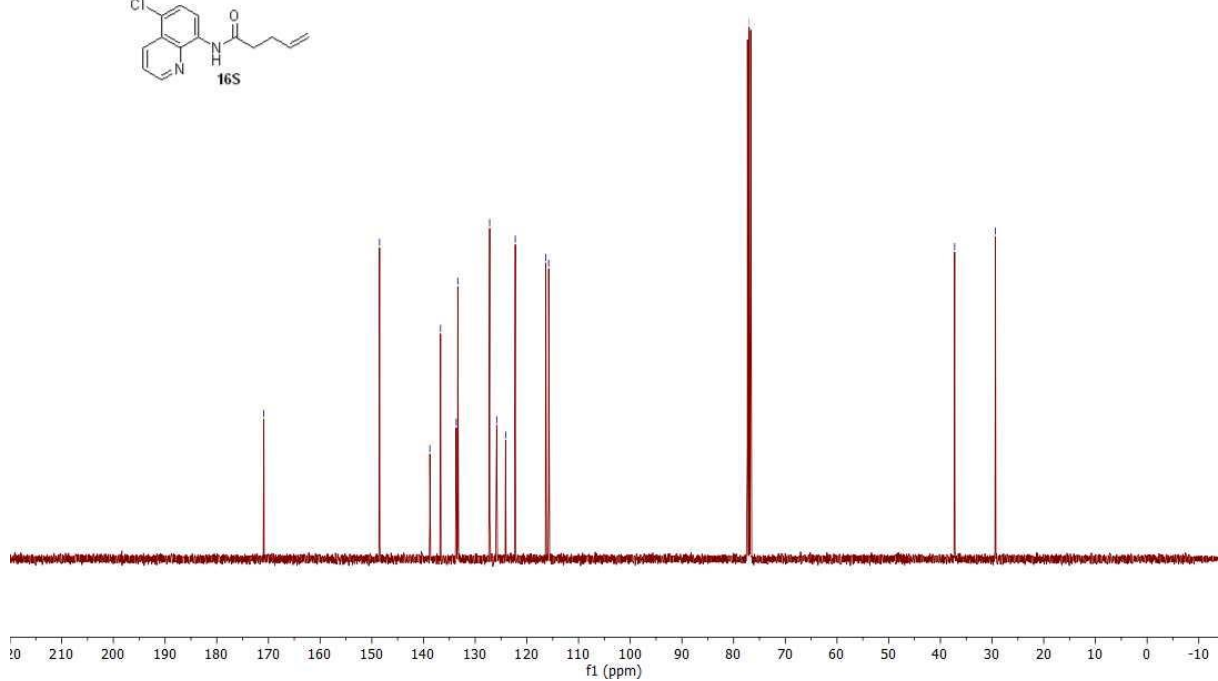

## 8.2 NMR spectra of the $\beta$ -boryl ketones.

210223.f322.10.fid — Fupeng Wu Q-1-3 — PROTON CDCl<sub>3</sub> {C:\Bruker\TopSpin3.6.2} 2102 22 — 300.20MHz

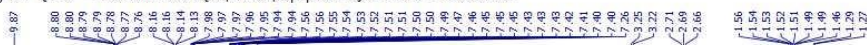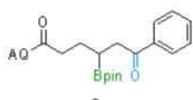

<sup>1</sup>H NMR, 300 MHz, CDCl<sub>3</sub>

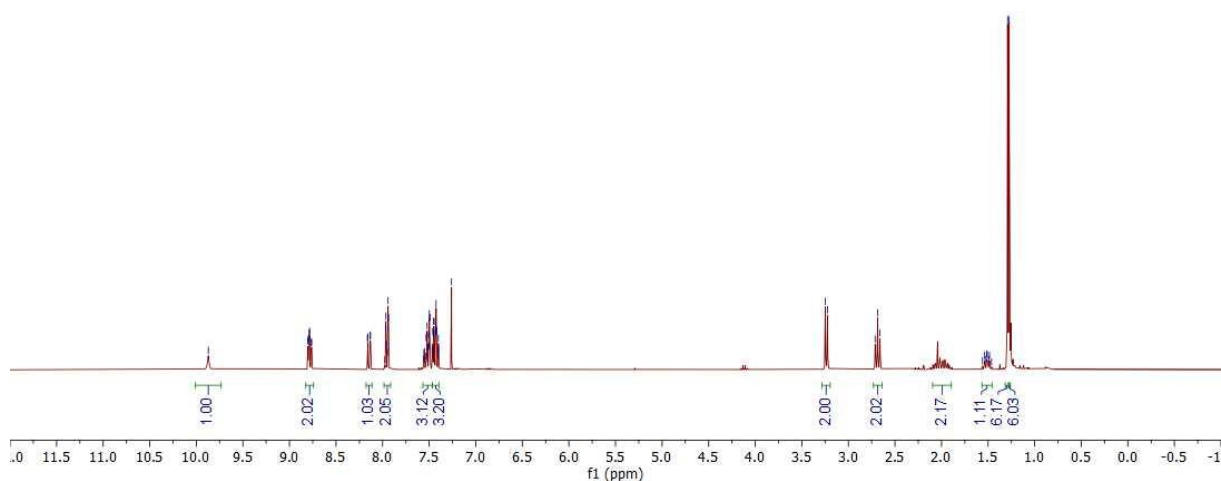

210223.f322.11.fid — Fupeng Wu Q-1-3 — C13CPD CDCl<sub>3</sub> {C:\Bruker\TopSpin3.6.2} 2102 22 — 75.49MHz

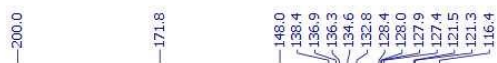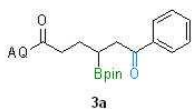

<sup>13</sup>C NMR, 75 MHz, CDCl<sub>3</sub>

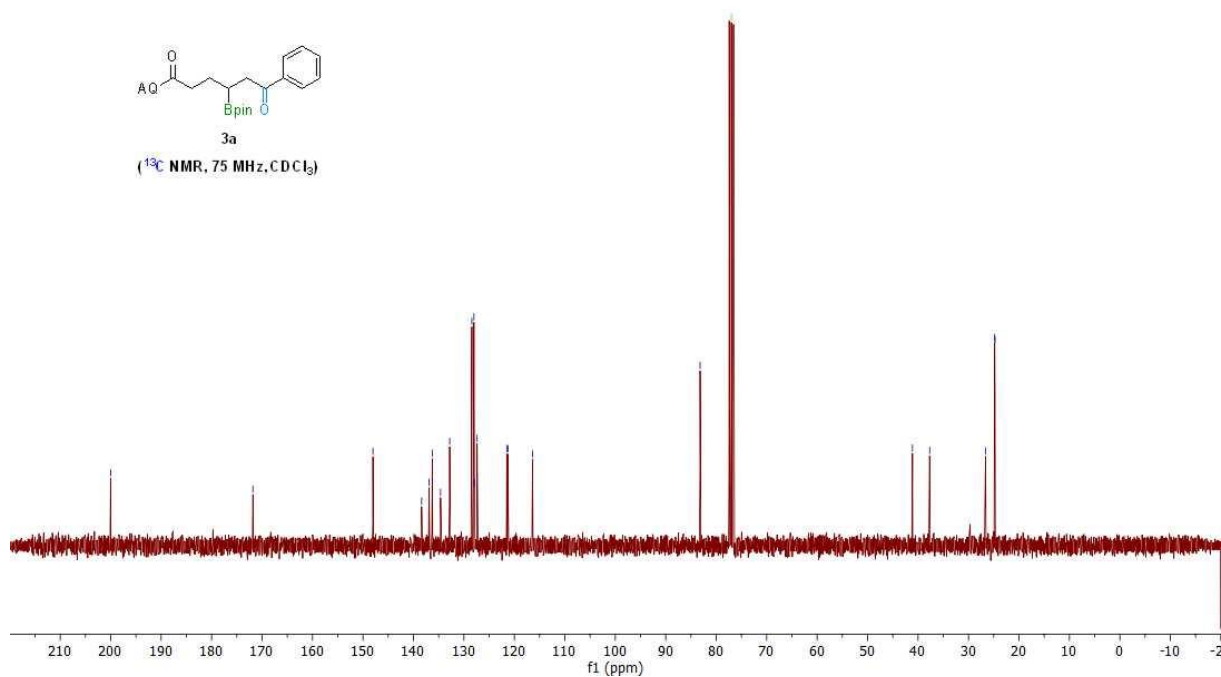

33.4

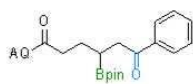

3a

(<sup>11</sup>B NMR, 96 MHz, CDCl<sub>3</sub>)

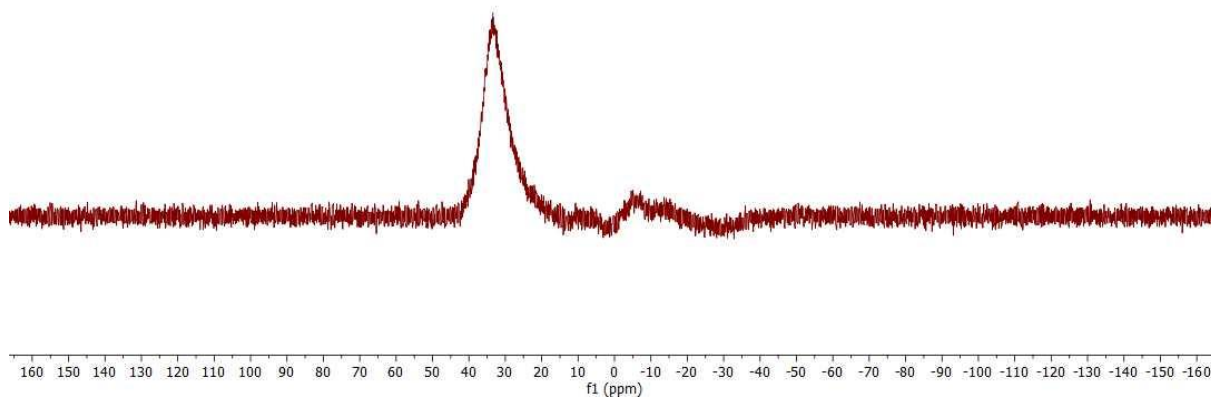

ESI-TOF Accurate Mass Report

File:21032201

Vial:1.B.1

Description:MeOH/0.1% HCOOH in H2O 90:10

Sample Name:Q-1

Date:22-Mar-2021

UserName:Fu-peng Wu

Time:11:36:29

Page 2

Sample Report:

(Time: 0.42) Combine ((35+37:40)-89:93) — Dead time test passed

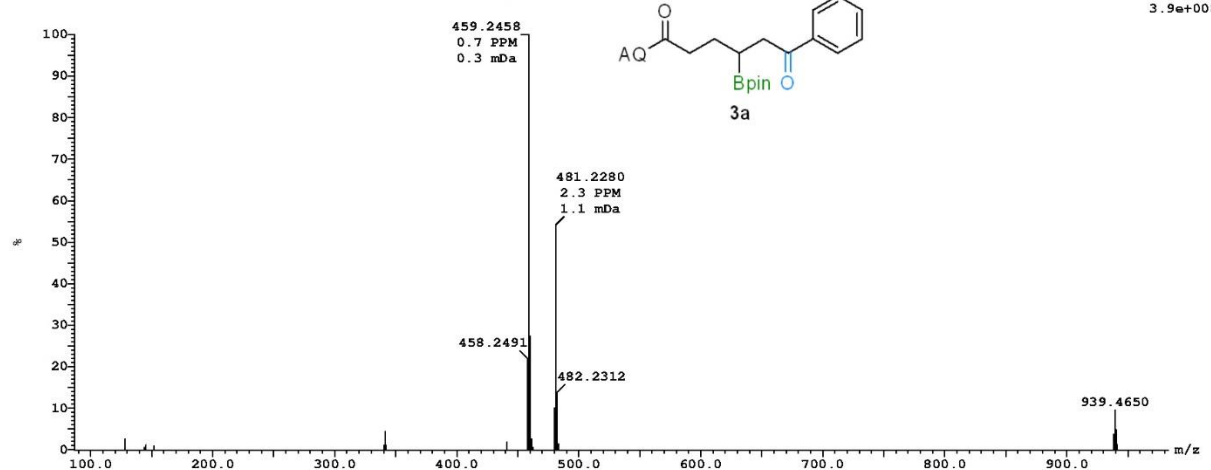

210223.f321.10.fid — Fupeng Wu Q-2-2 — PROTON CDCl<sub>3</sub> {C:\Bruker\TopSpin3.6.2} 2102 21 — 300.20MHz

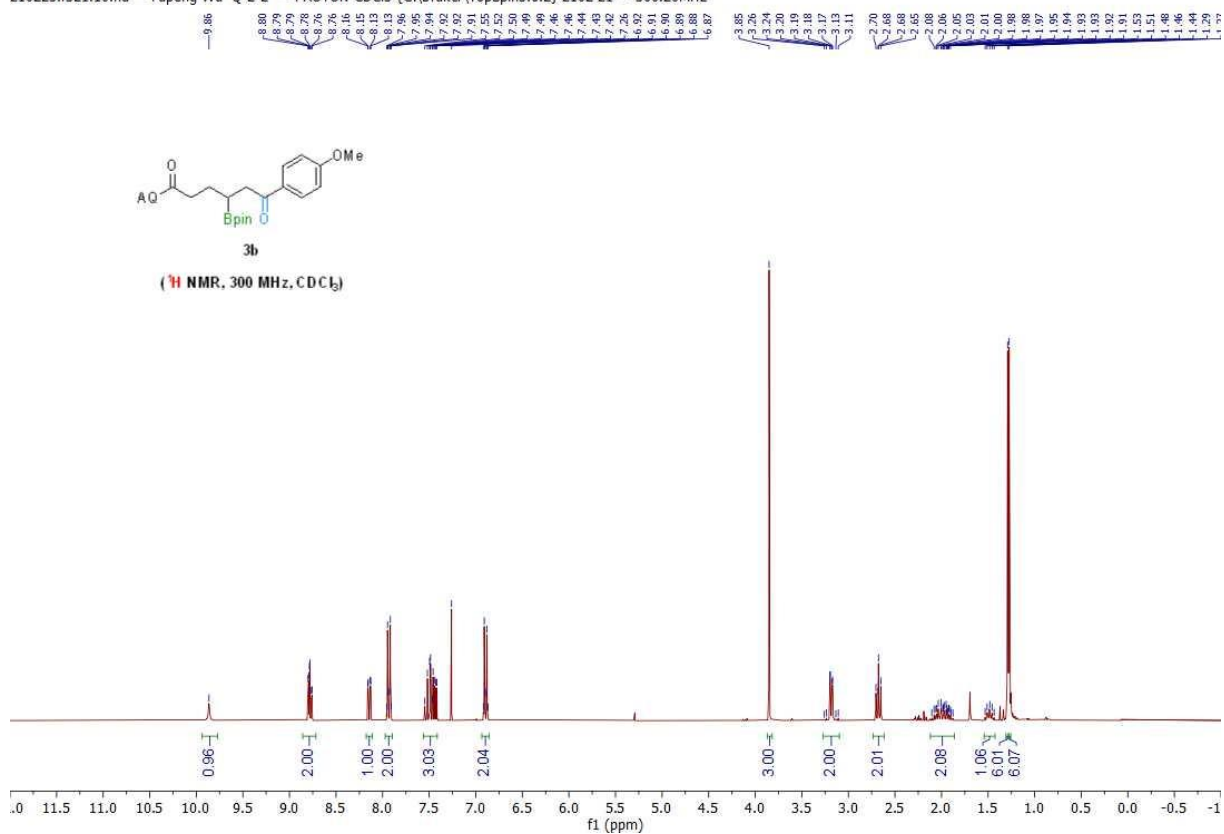

210223.f321.11.fid — Fupeng Wu Q-2-2 — <sup>13</sup>C NMR CDCl<sub>3</sub> {C:\Bruker\TopSpin3.6.2} 2102 21 — 75.49MHz

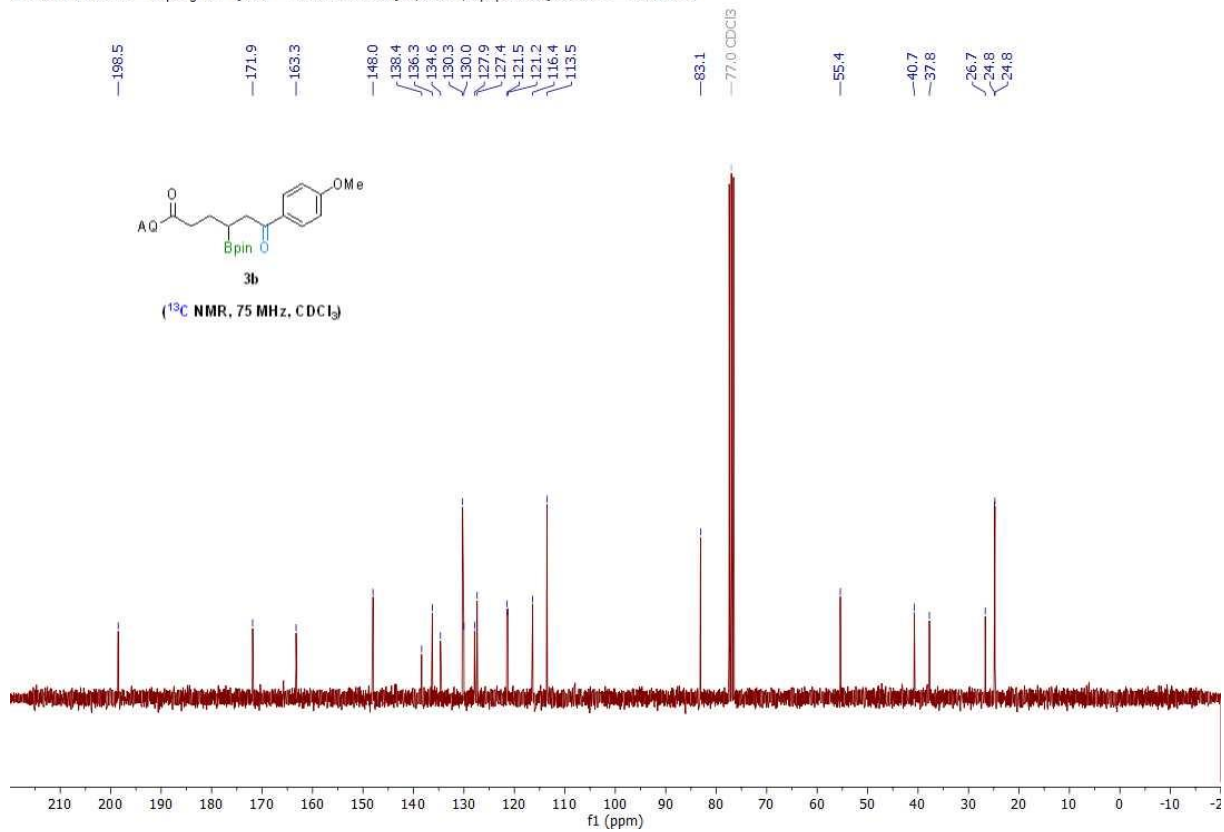



— 33.7

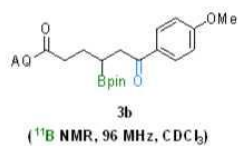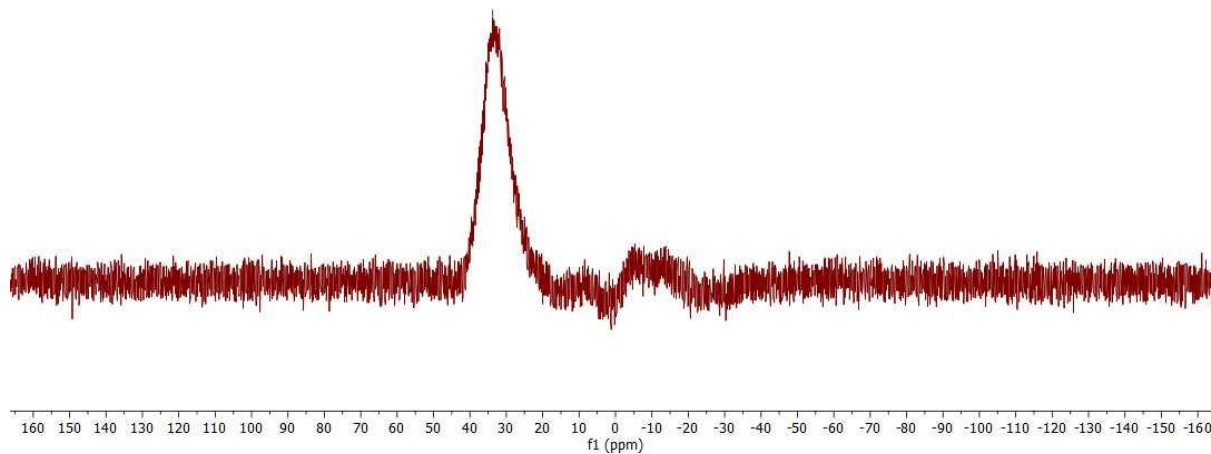

ESI-TOF Accurate Mass Report

File:21032223

Vial:1.B.2

Description:MeOH/0.1% HCOOH in H2O 90:10

Sample Name:Q-2

Date:22-Mar-2021

UserName:Fu-peng Wu

Time:15:35:09

Page 2

Sample Report:

(Time: 0.41) Combine ((35+37:40)-88:92) — Dead time test passed

1: TOF MS ES+  
3.6e+008

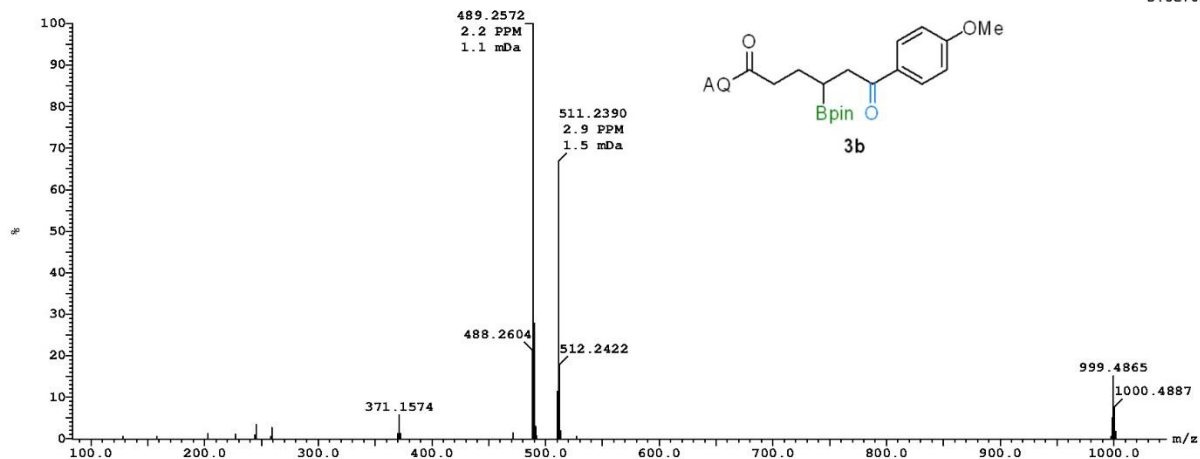

210226.f321.10.fid — Fupeng Wu Q-13 — PROTON CDCl3 {C:\Bruker\TopSpin3.6.2} 2102 21 — 300.20MHz

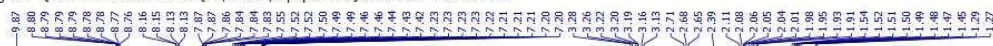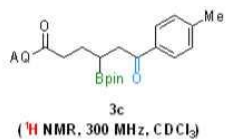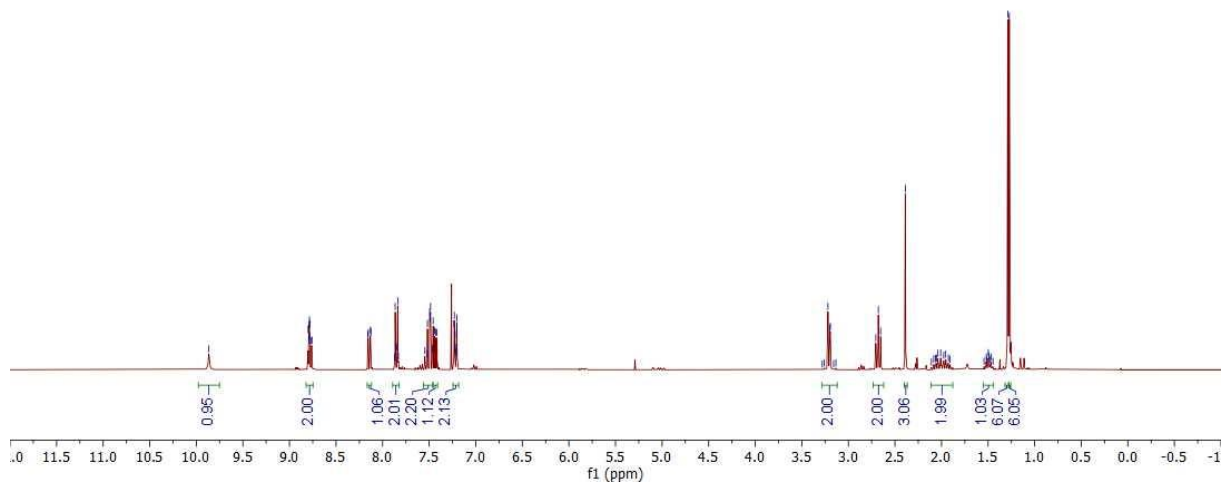

210226.f321.11.fid — Fupeng Wu Q-13 — C13CPD CDCl3 {C:\Bruker\TopSpin3.6.2} 2102 21 — 75.49MHz

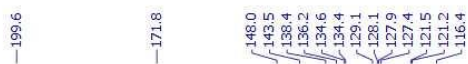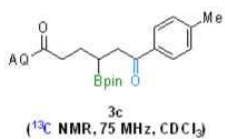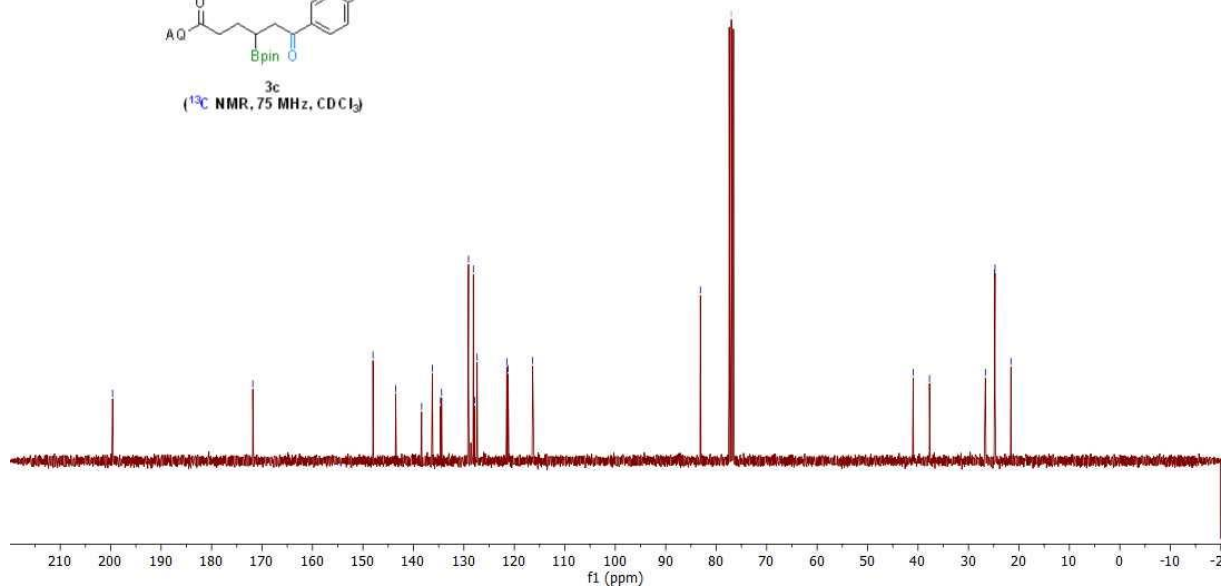

Sample Report:

(Time: 0.46) Combine (41:45-93:96) - Dead time test passed

1: TOF MS ES+  
3.3e+08

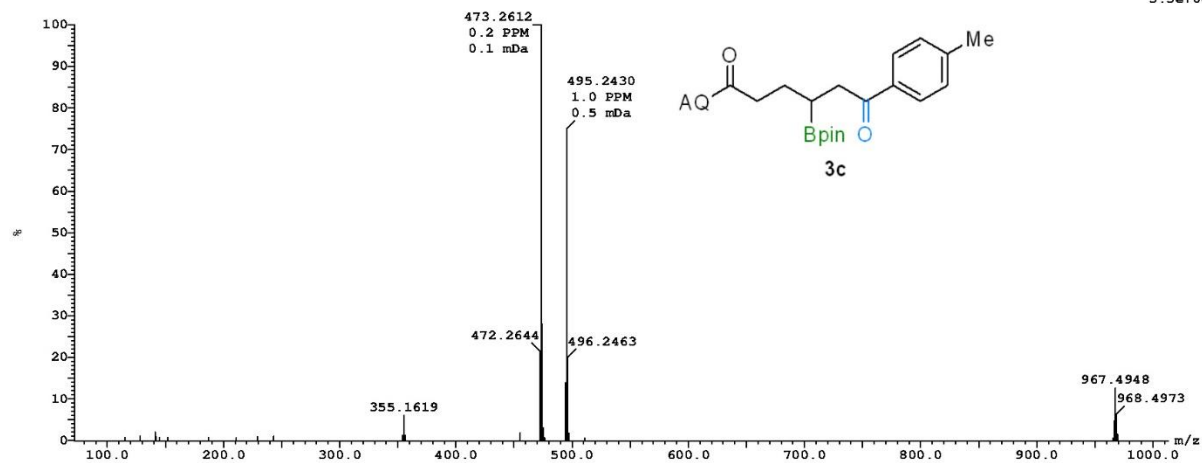



33.6

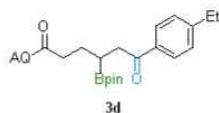

(<sup>11</sup>B NMR, 96 MHz, CDCl<sub>3</sub>)

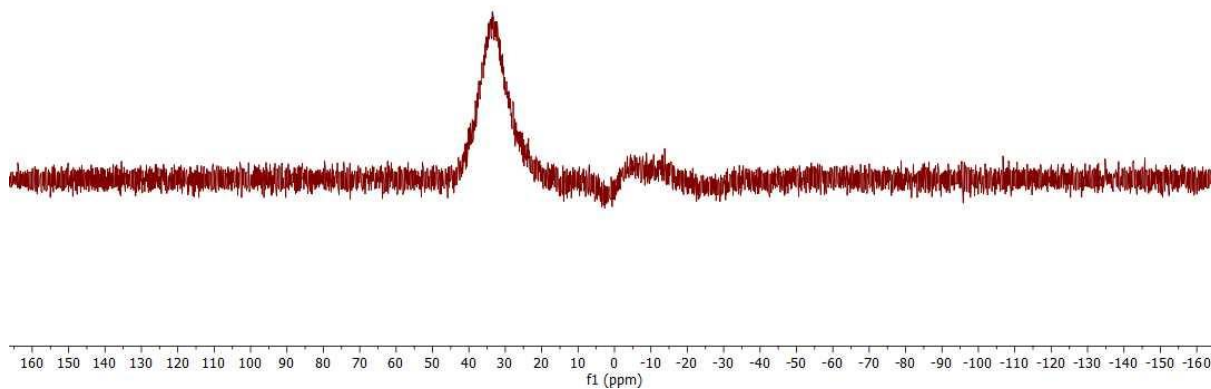

ESI-TOF Accurate Mass Report

File:21032205

Vial:1.B.5

Description:MeOH/0.1% HCOOH in H2O 90:10

Sample Name:Q-6

Date:22-Mar-2021

UserName:Fu-peng Wu

Time:11:54:25

Page 2

Sample Report:

(Time: 0.50) Combine ((42:43+45:47)-96:99) - Dead time test passed

1:TOF MS ES+  
4.0e+008

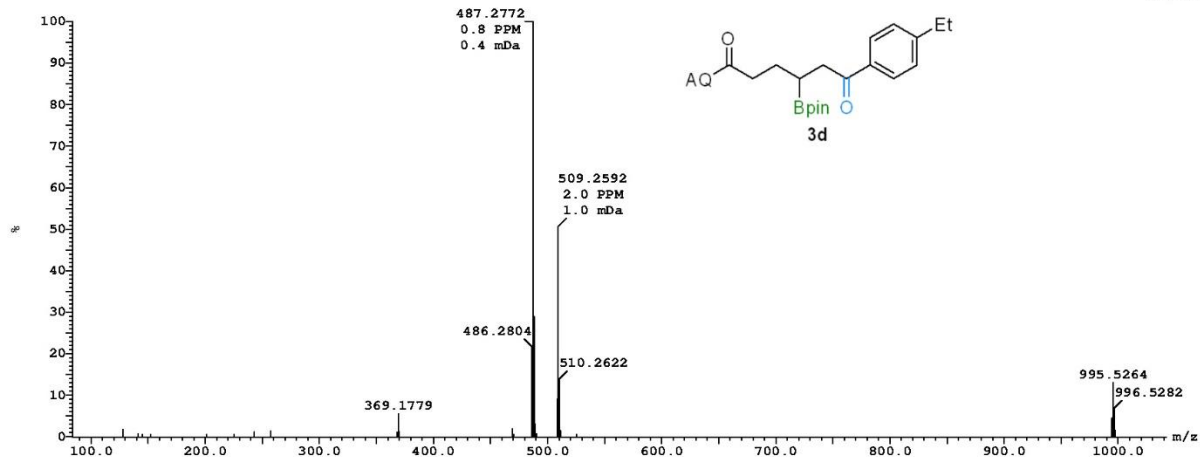

210223.f320.10.fid — Fupeng Wu Q-3-2 — PROTON CDCl3 {C:\Bruker\TopSpin3.6.2} 2102 20 — 300.20MHz

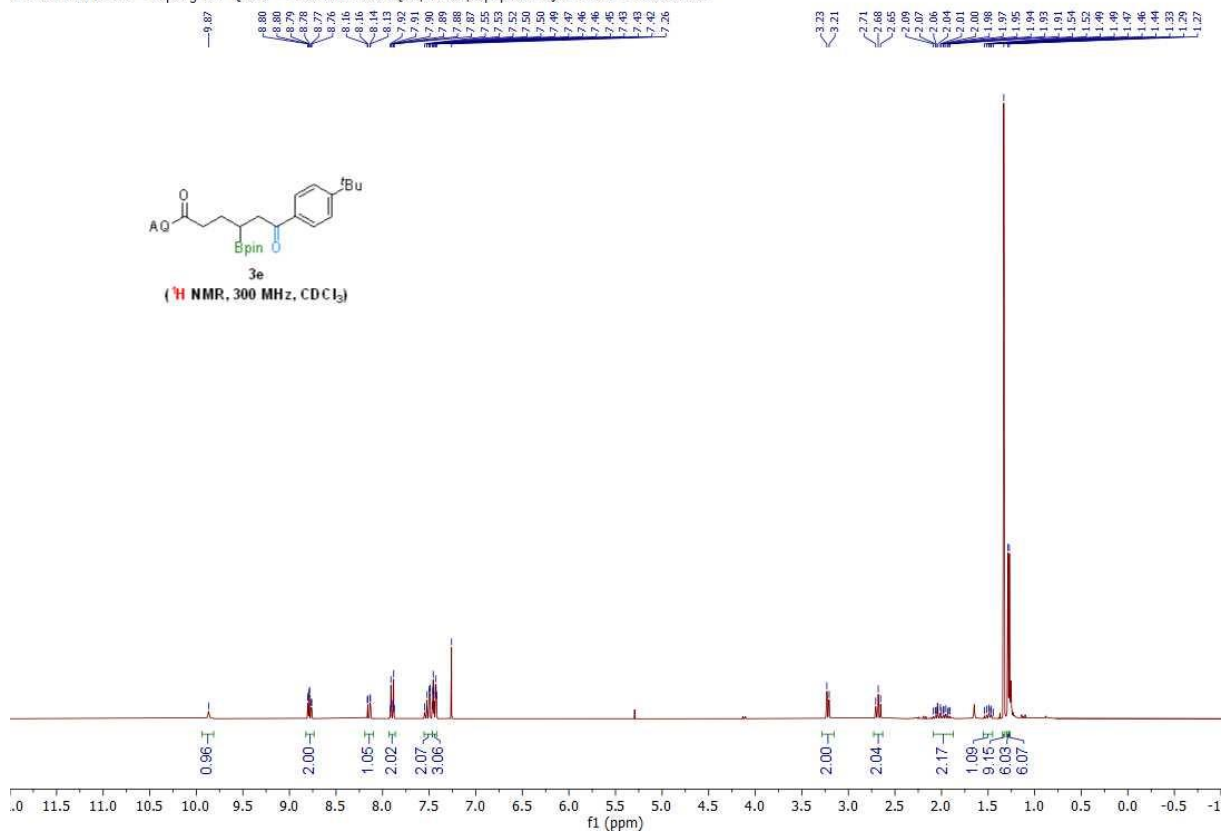

210223.f320.11.fid — Fupeng Wu Q-3-2 — C13CPD CDCl3 {C:\Bruker\TopSpin3.6.2} 2102 20 — 75.49MHz

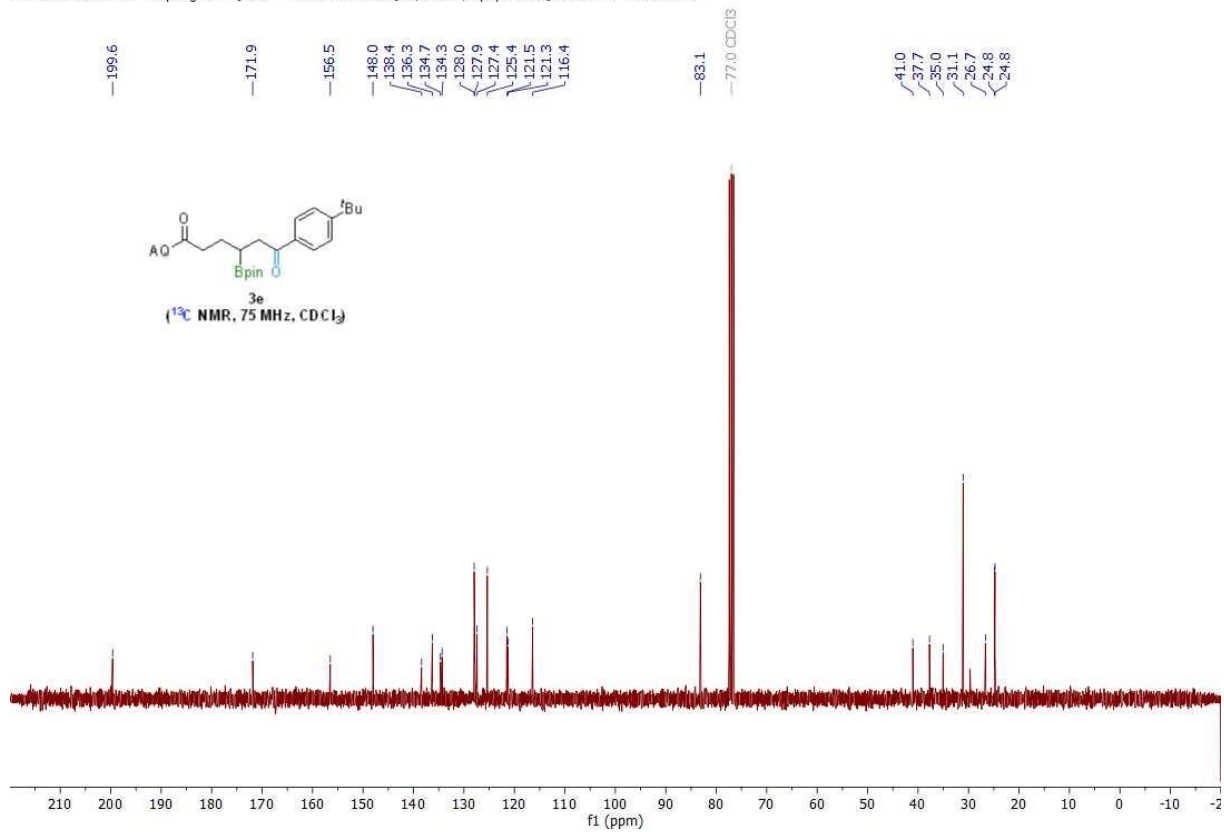

— 33.0

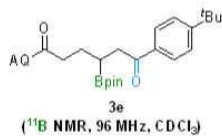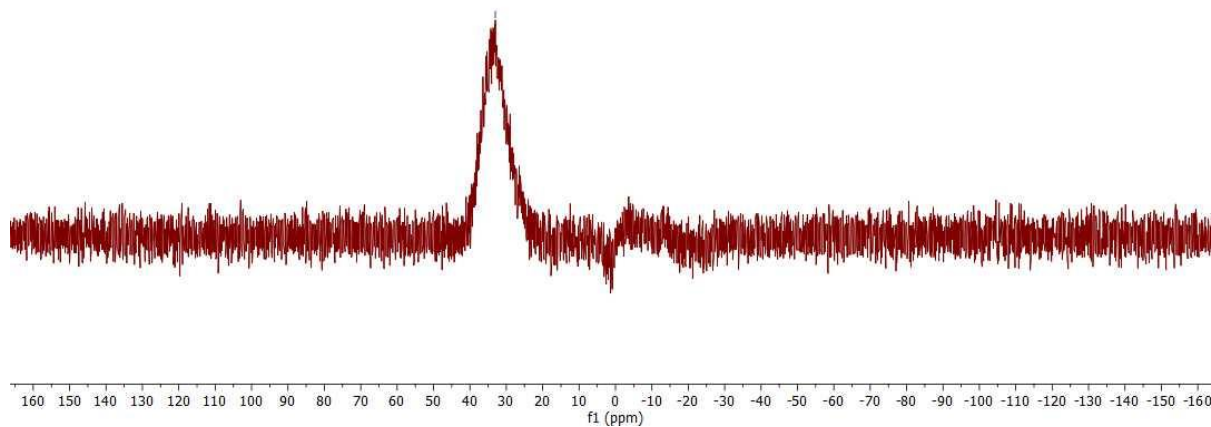

ESI-TOF Accurate Mass Report

File:21032203

Vial:1.B.3

Description:MeOH/0.1% HCOOH in H2O 90:10

Sample Name:Q-3

Date:22-Mar-2021

UserName:Fu-peng Wu

Time:11:45:27

Page 2

Sample Report:

(Time: 0.58) Combine (51:55-(1:2+103:107)) - Dead time test passed

1:TOF MS ES+  
4.7e+008

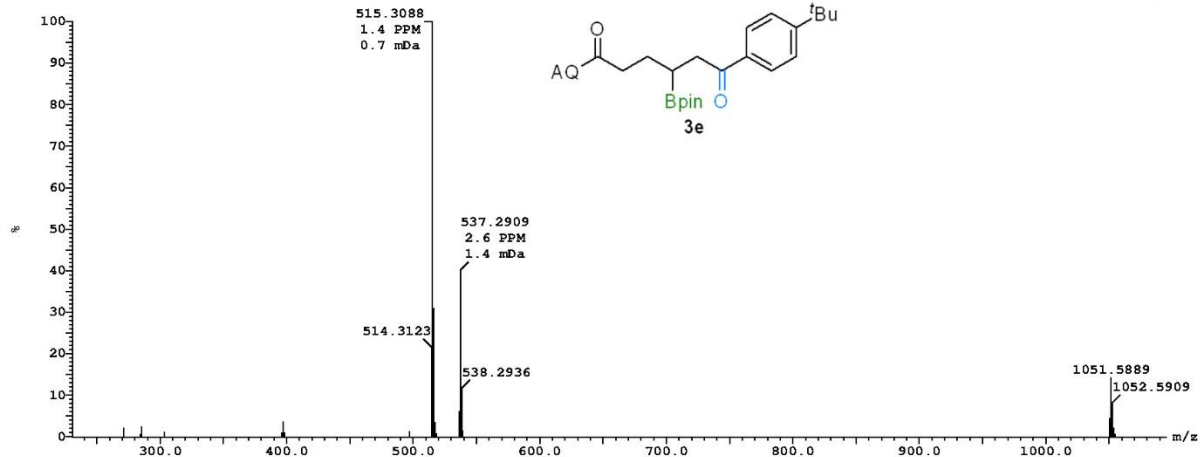

210226.f322.10.fid — Fupeng Wu Q-14 — PROTON CDCl3 {C:\Bruker\TopSpin3.6.2} 2102.22 — 300.20MHz

9.87, 8.80, 8.79, 8.78, 8.77, 8.76, 8.16, 8.15, 8.13, 7.73, 7.72, 7.70, 7.68, 7.67, 7.55, 7.52, 7.50, 7.49, 7.46, 7.46, 7.46, 7.44, 7.43, 7.42, 7.36, 7.18, 7.17, 7.16, 7.14

3.28, 3.26, 3.20, 3.16, 3.13, 2.71, 2.65, 2.29, 2.09, 2.07, 2.04, 2.01, 1.99, 1.97, 1.95, 1.94, 1.93, 1.90, 1.89, 1.89, 1.54, 1.51, 1.51, 1.49, 1.48, 1.47, 1.46, 1.29

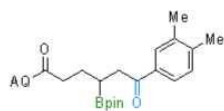

**3f**  
(<sup>1</sup>H NMR, 300 MHz, CDCl<sub>3</sub>)

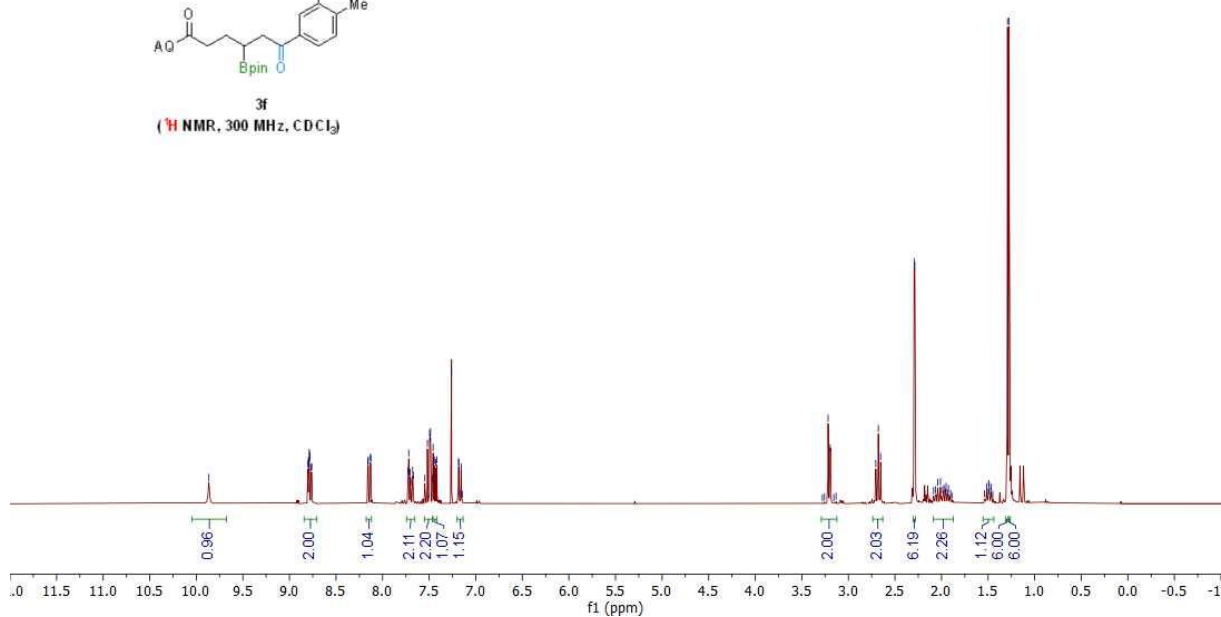

210226.f322.11.fid — Fupeng Wu Q-14 — C13CPD CDCl3 {C:\Bruker\TopSpin3.6.2} 2102.22 — 75.49MHz

199.9, 171.9, 148.0, 142.2, 138.4, 136.7, 136.2, 134.8, 134.6, 129.6, 129.1, 127.9, 127.4, 125.8, 121.5, 121.2, 116.4

83.1, 77.0 CDCl3

40.9, 37.7, 26.6, 24.8, 24.8, 20.0, 19.7

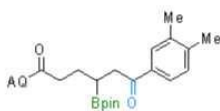

**3f**  
(<sup>13</sup>C NMR, 75 MHz, CDCl<sub>3</sub>)

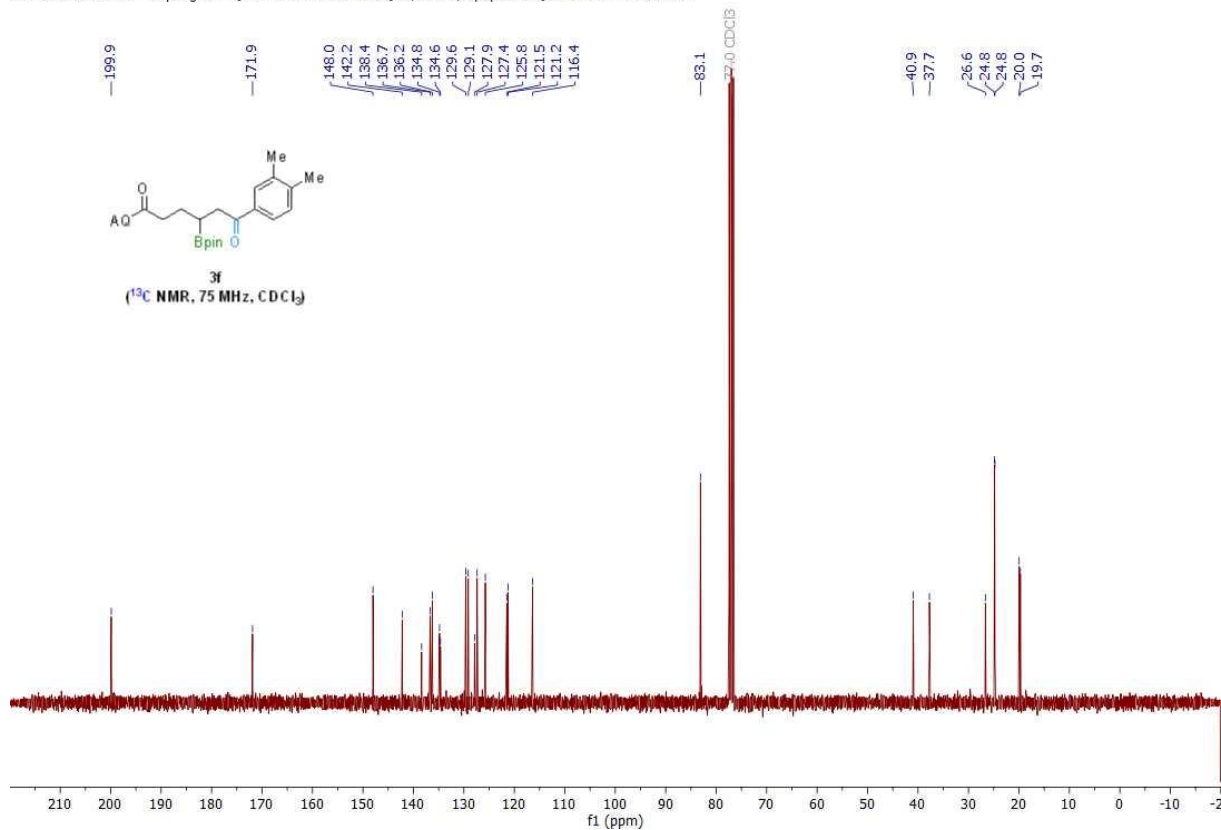



Sample Report:

(Time: 0.50) Combine (43:47-96:99) - Dead time test passed

1: TOF MS ES+  
3.7e+08

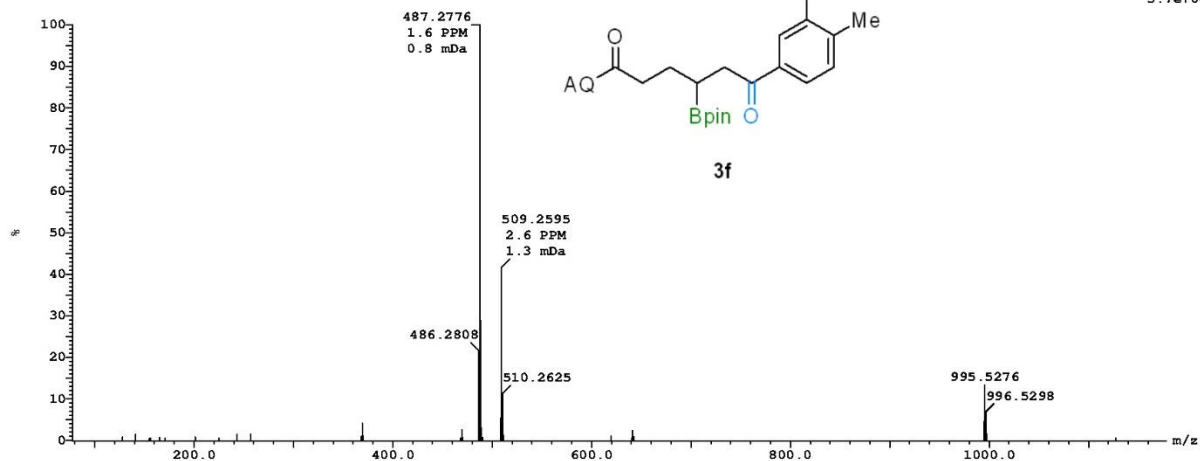

210301.f328.10.fid — Fupeng Wu Q-17 — PROTON CDCl3 (C:\Bruker\TopSpin3.6.2) 2103 28 — 300.20MHz

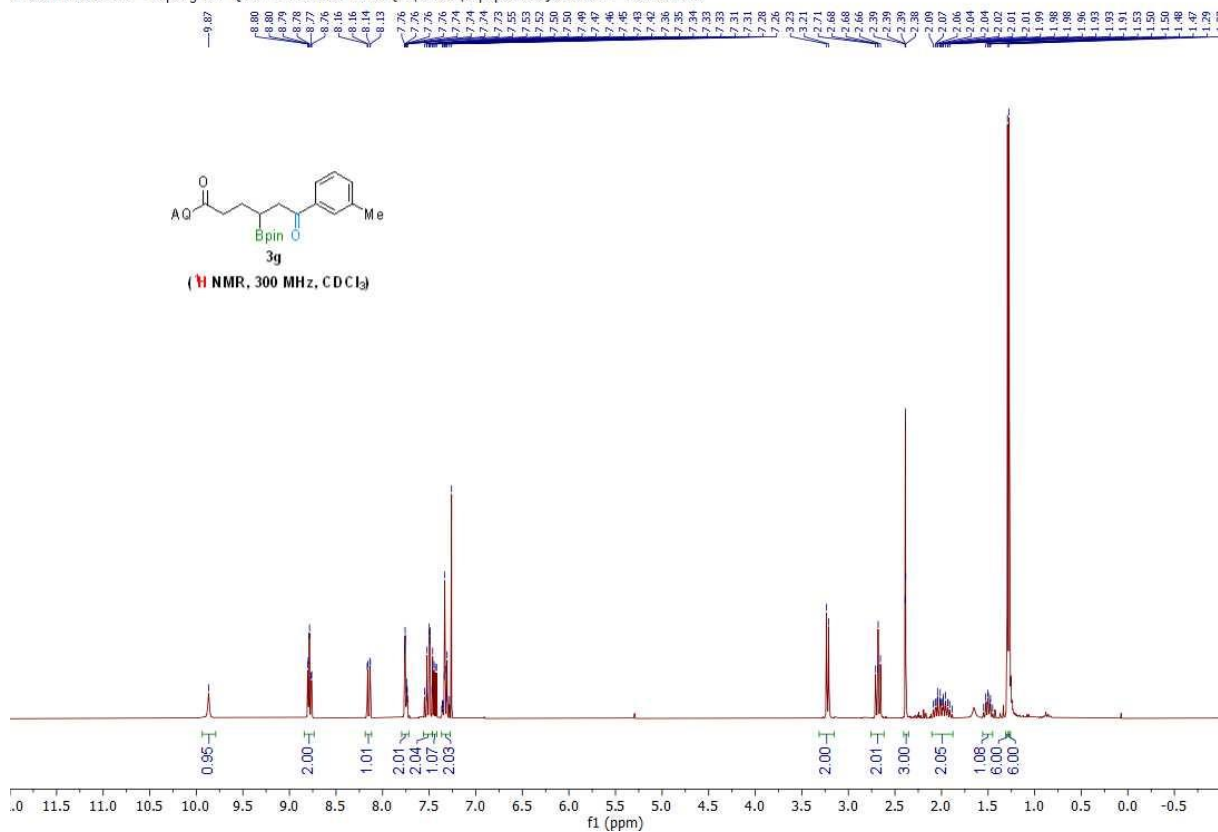

210301.418.11.fid — Fupeng Wu Q-17 — Au13C CDCl3 (C:\Bruker\TopSpin3.5p6) 2103 18 — 100.63MHz

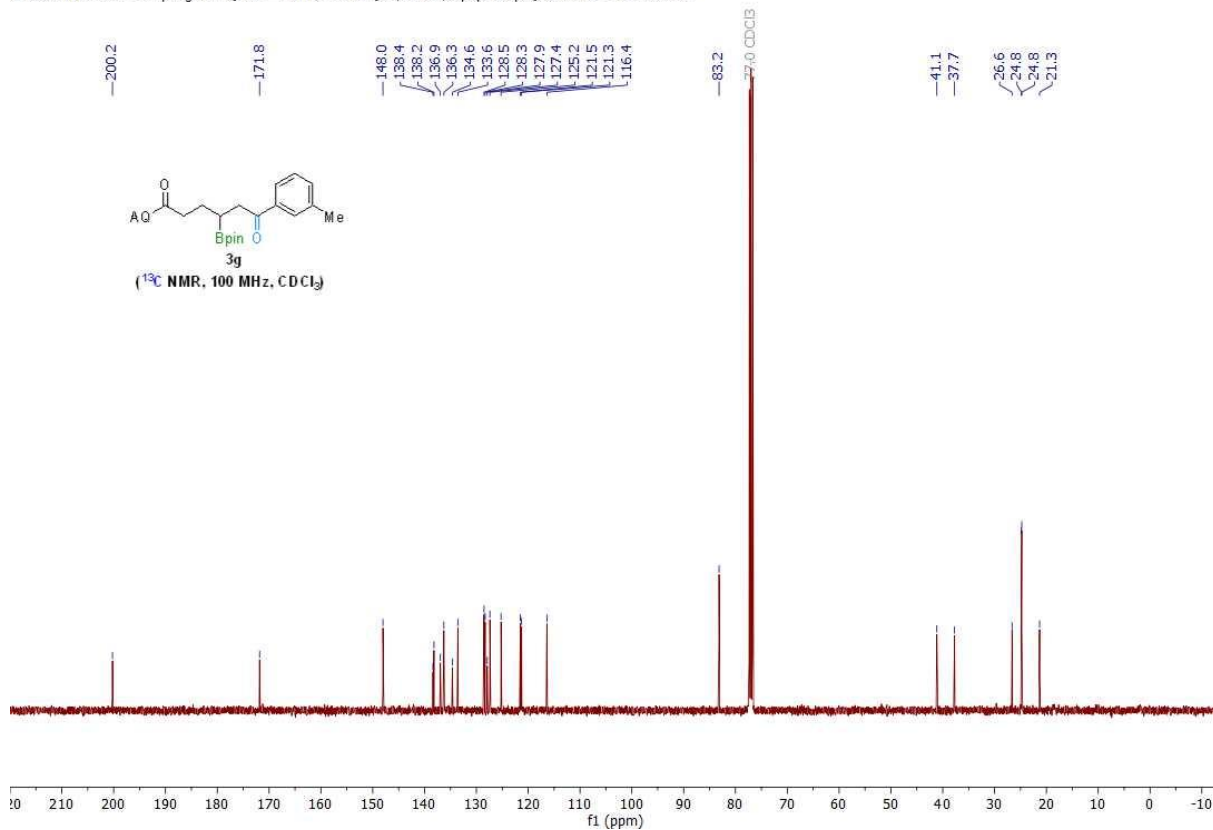

—32.9

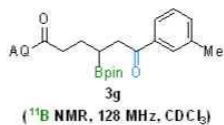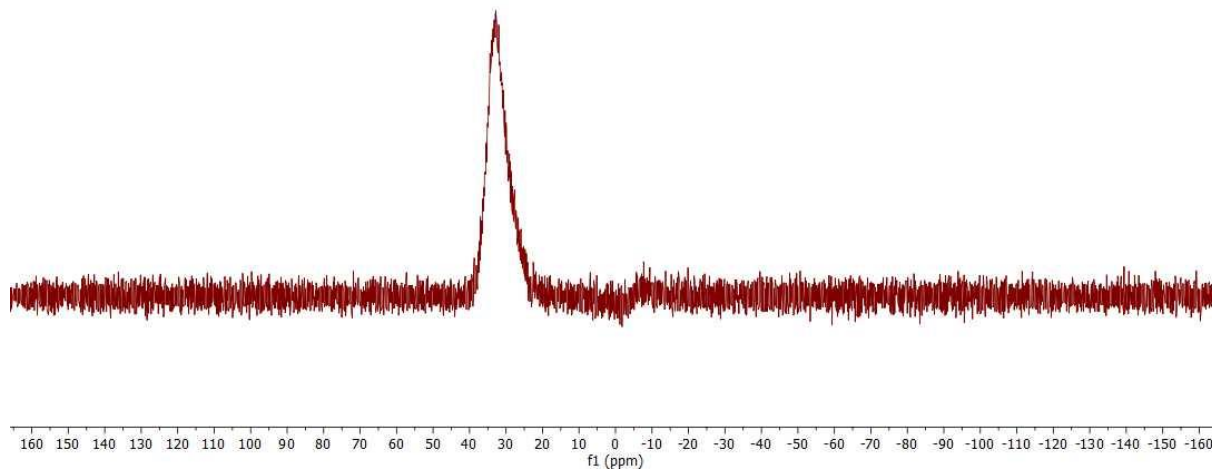

ESI-TOF Accurate Mass Report

File:21032213

Vial:1:C.5

Description:MeOH/0.1% HCOOH in H2O 90:10

Sample Name:Q-17

Date:22-Mar-2021

UserName:Fu-peng Wu

Time:12:30:38

Page 2

Sample Report:

(Time: 0.45) Combine (39:43-92:96) — Dead time test passed

1:TOF MS ES+  
2.9e+008

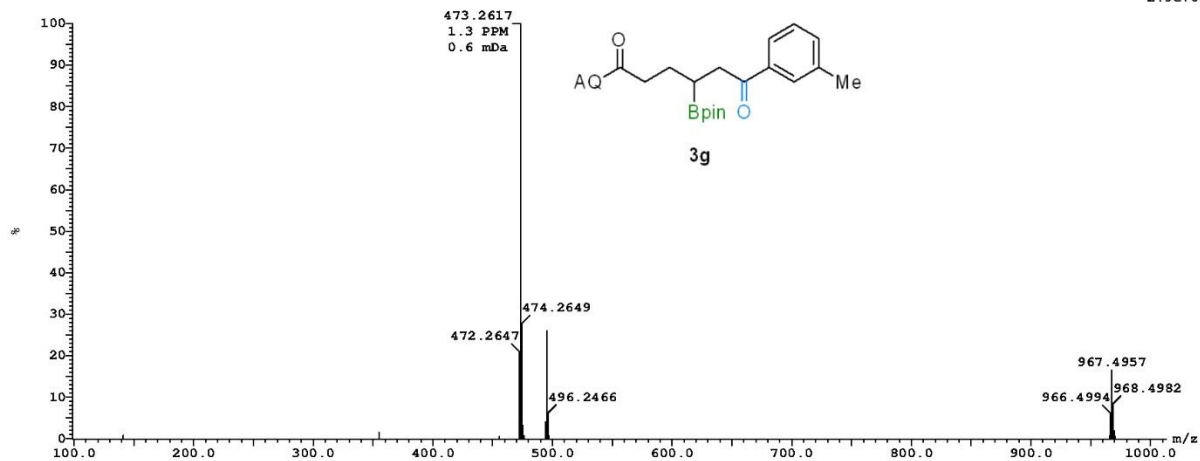

210224.f307.10.fid — Fupeng Wu Q-11 — PROTON CDCl3 {C:\Bruker\TopSpin3.6.2} 2102 7 — 300.20MHz

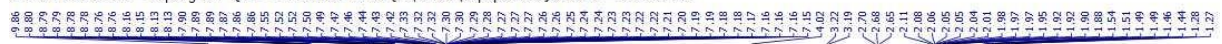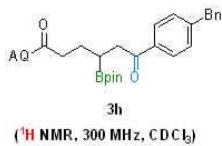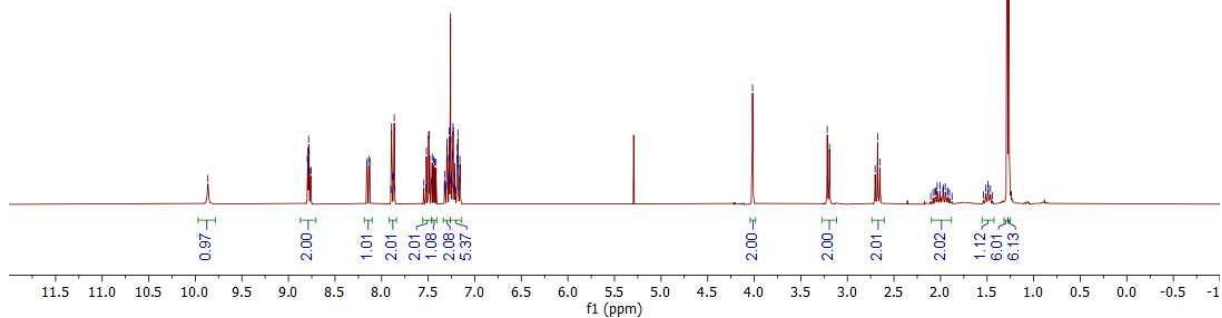

210224.f307.11.fid — Fupeng Wu Q-11 — C13CPD CDCl3 {C:\Bruker\TopSpin3.6.2} 2102 7 — 75.49MHz

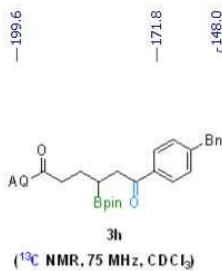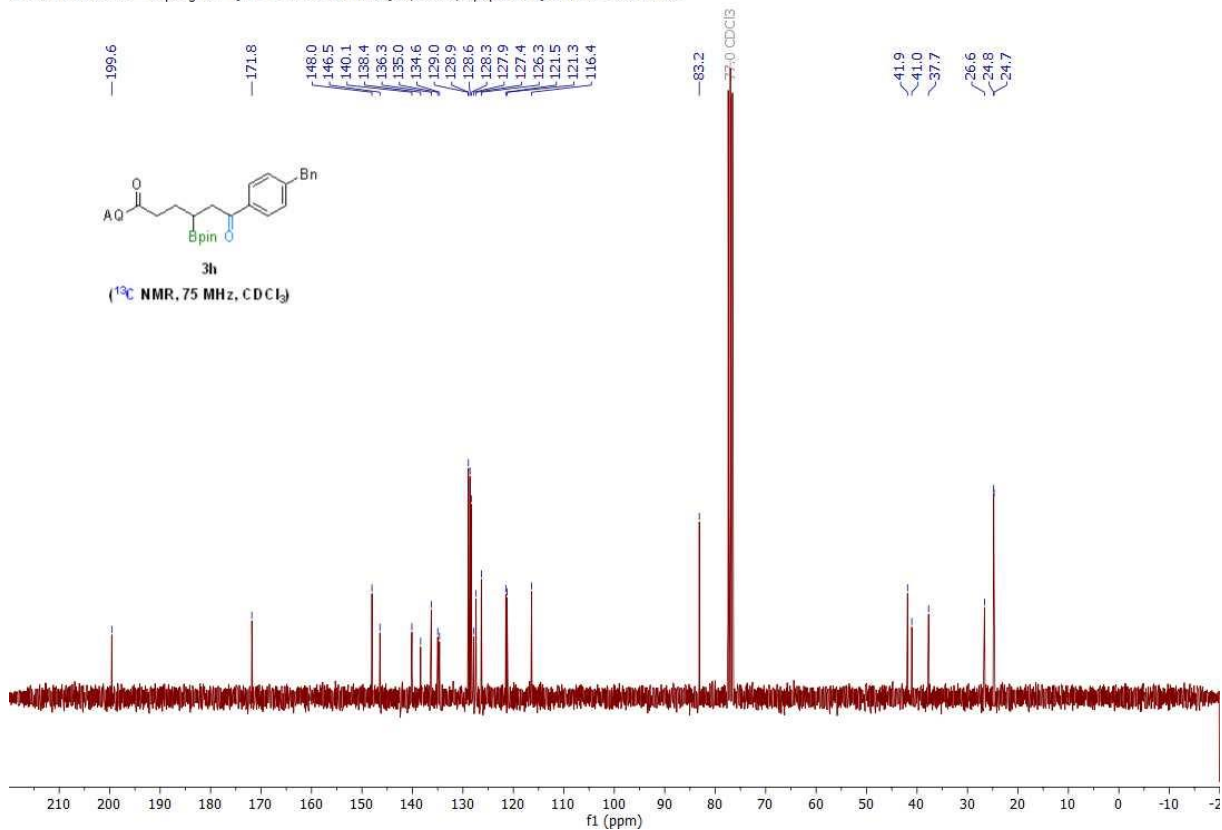

33.5

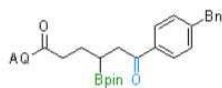

3h

(<sup>11</sup>B NMR, 96 MHz, CDCl<sub>3</sub>)

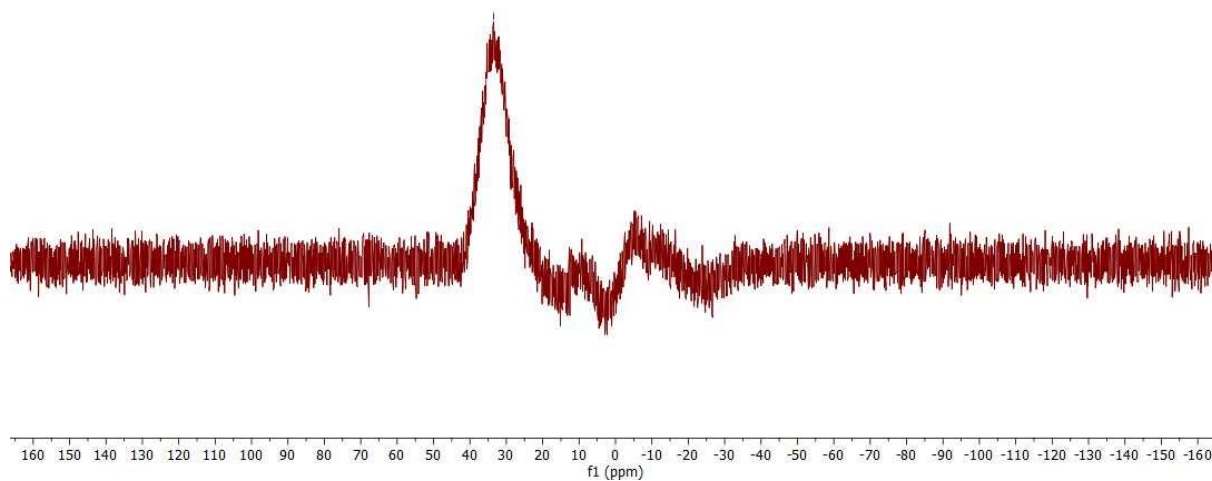

ESI-TOF Accurate Mass Report

File:21032225

Vial:1.B.8

Description:MeOH/0.1% HCOOH in H2O 90:10

Sample Name:Q-11

Date:22-Mar-2021

UserName:Fu-peng Wu

Time:15:10:47

Page 2

Sample Report:

(Time: 0.56) Combine (49:53) - Dead time test passed

1: TOF MS ES+  
4.4e+008

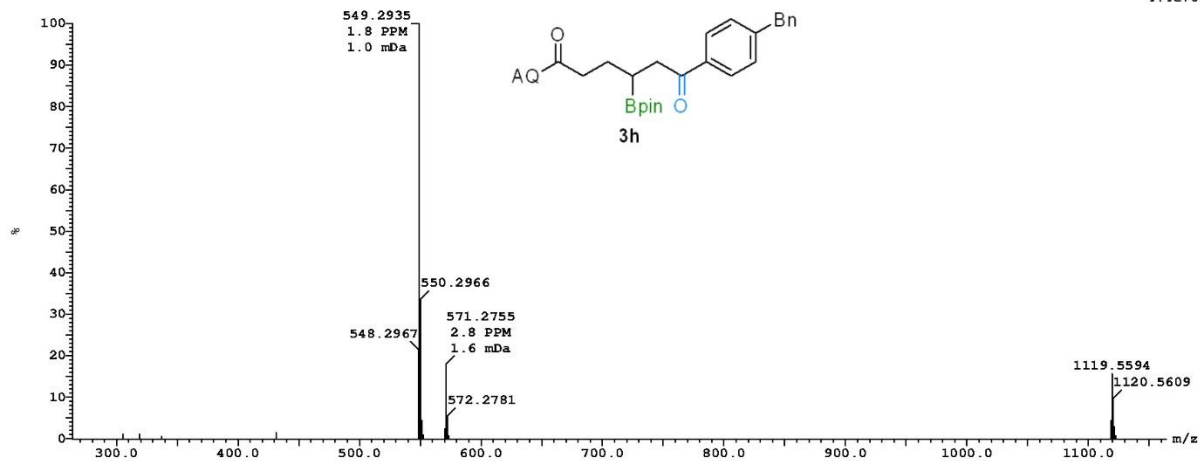

210224.f308.10.fid — Fupeng Wu Q-12 — PROTON CDCl3 {C:\Bruker\TopSpin3.6.2} 2102 8 — 300.20MHz

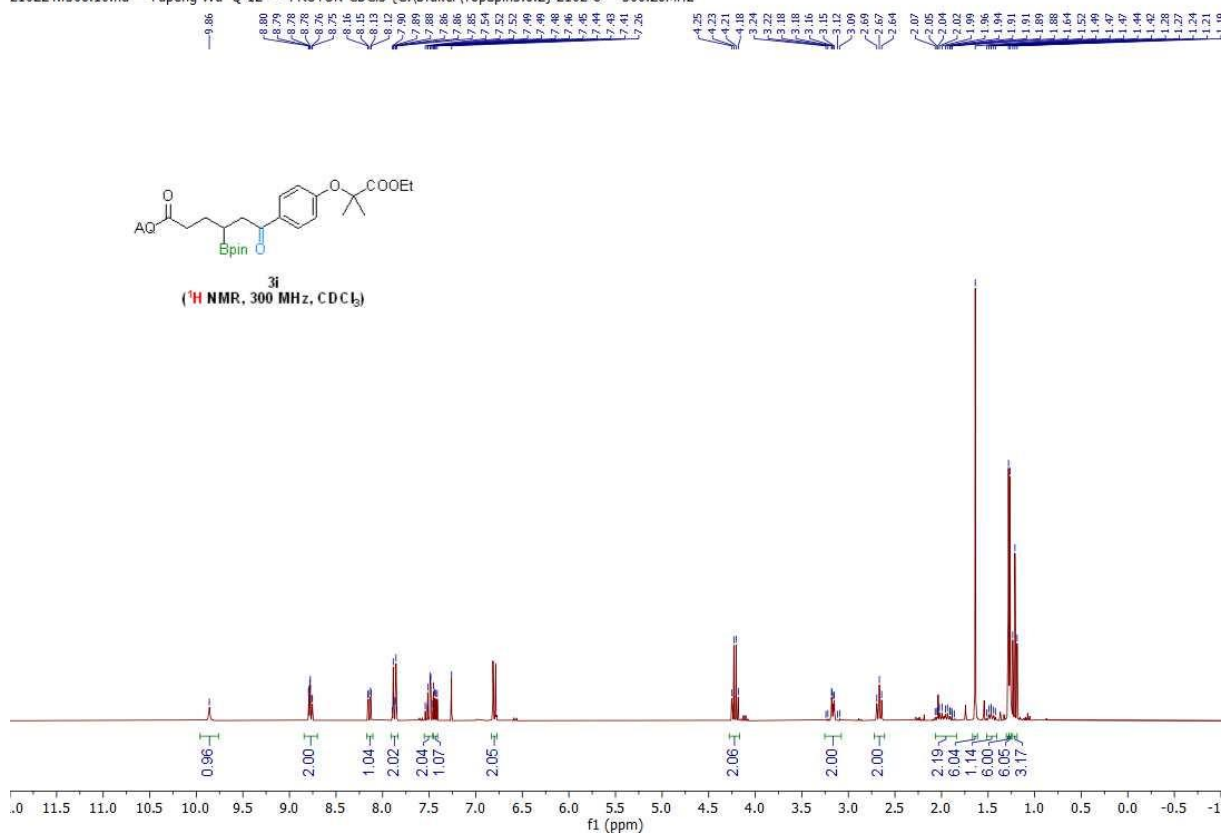

210224.f308.11.fid — Fupeng Wu Q-12 — C13CPD CDCl3 {C:\Bruker\TopSpin3.6.2} 2102 8 — 75.49MHz

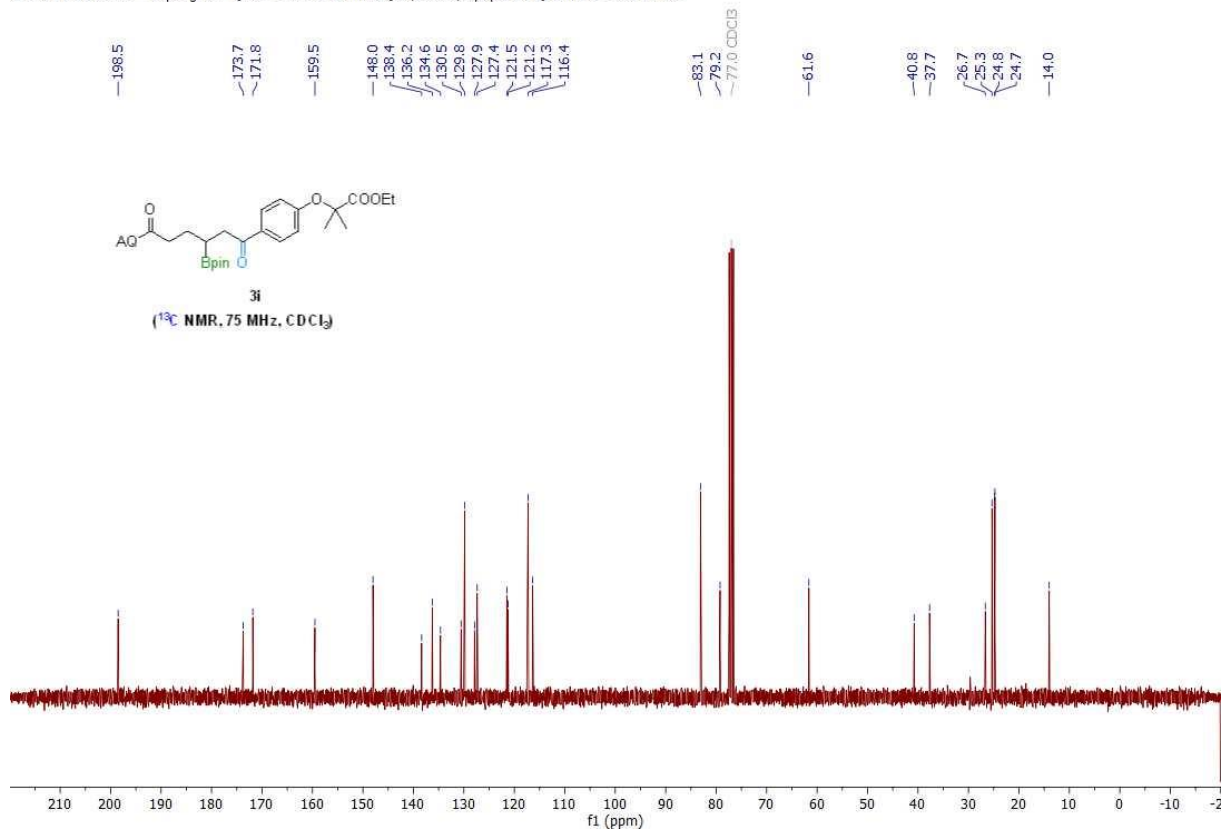

82.3

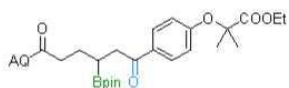

3i  
(<sup>11</sup>B NMR, 96 MHz, CDCl<sub>3</sub>)

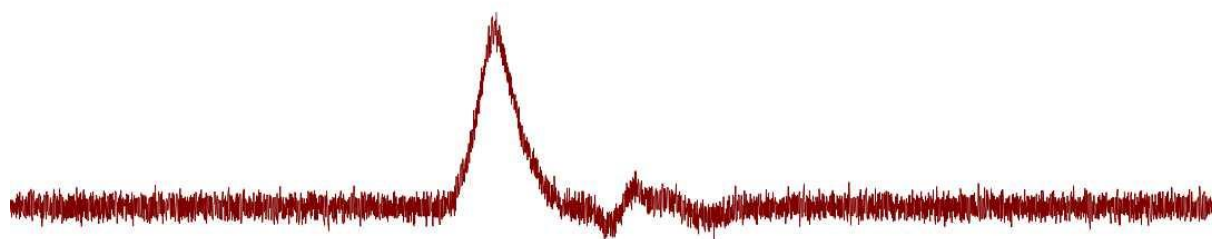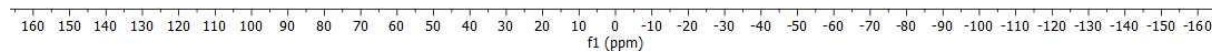

ESI-TOF Accurate Mass Report

File:21032209

Vial:1:C,1

Description:MeOH/0.1% HCOOH in H2O 90:10

Sample Name:Q-12

Date:22-Mar-2021

UserName:Fu-peng Wu

Time:12:12:46

Page 2

Sample Report:

(Time: 0.44) Combine (38:42-91:95) — Dead time test passed

1:TOF MS ES+  
6.1e+008

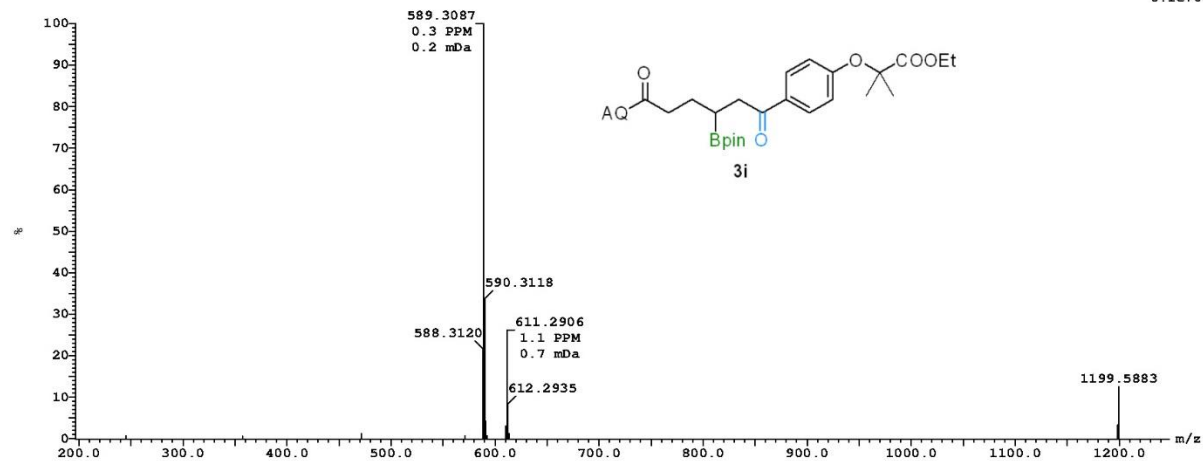





82.3

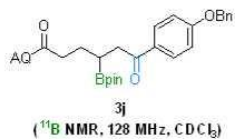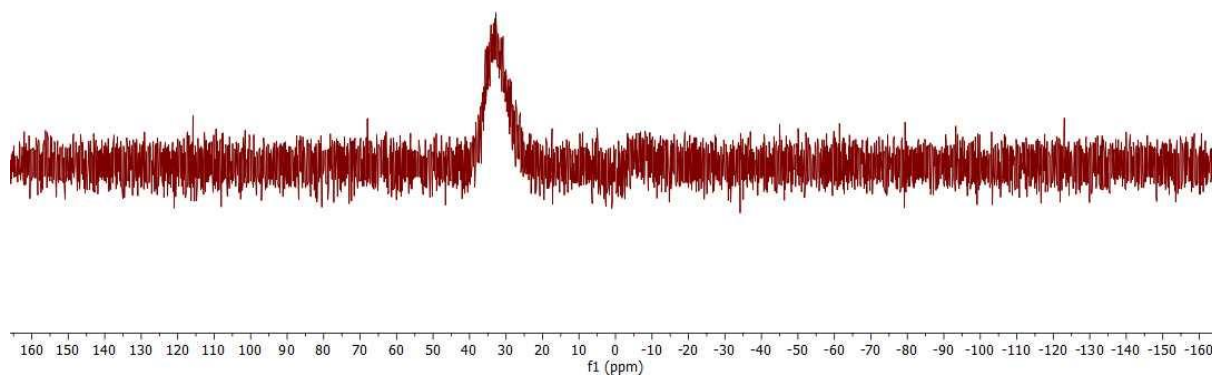

ESI-TOF Accurate Mass Report

File:21032218

Vial:1.D.2

Description:MeOH/0.1% HCOOH in H2O 90:10

Sample Name:Q-25

Date:22-Mar-2021

UserName:Fu-peng Wu

Time:12:53:04

Page 2

Sample Report:

(Time: 0.51) Combine (44:48-97:100) — Dead time test passed

1:TOF MS ES+  
5.2e+008

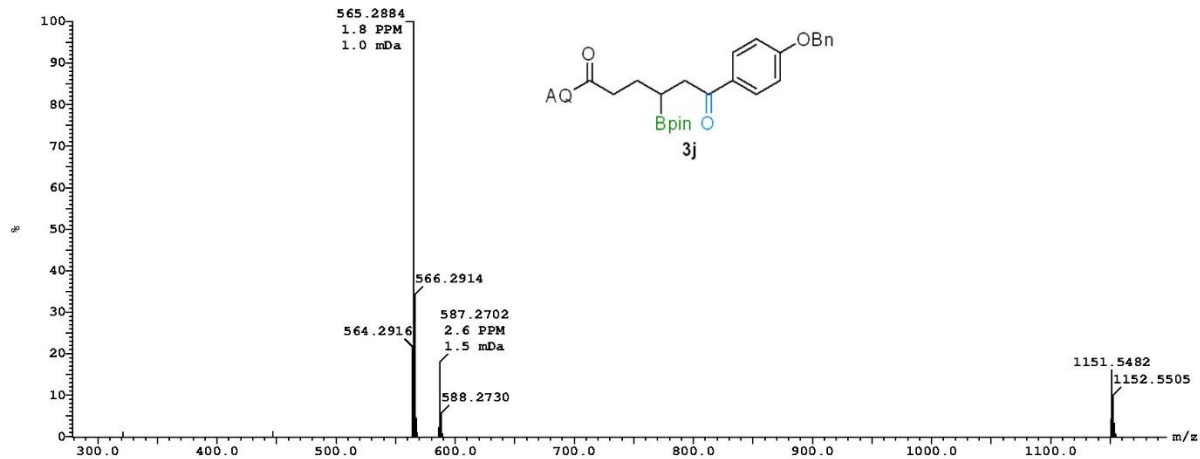

210301.415.10.fid — Fupeng Wu Q-4 — Au1H CDCl3 {C:\Bruker\TopSpin3.5pl6} 2103 15 — 400.13MHz

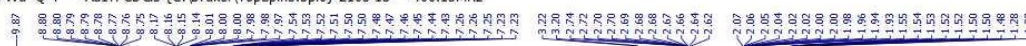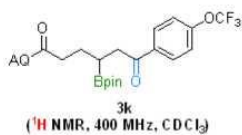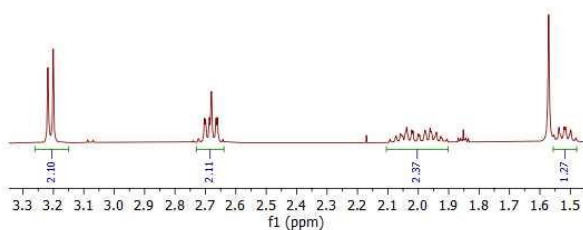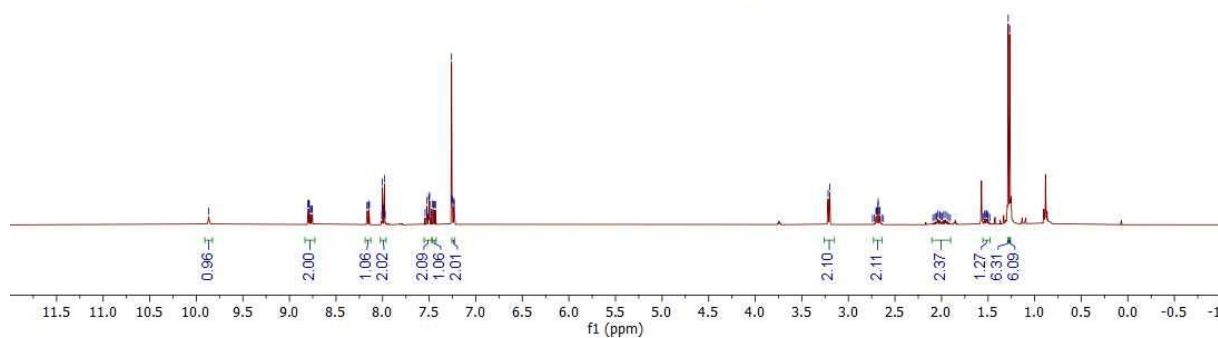

210301.415.11.fid — Fupeng Wu Q-4 — Au13C CDCl3 {C:\Bruker\TopSpin3.5pl6} 2103 15 — 100.63MHz

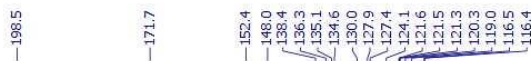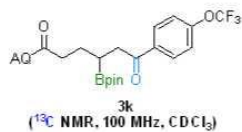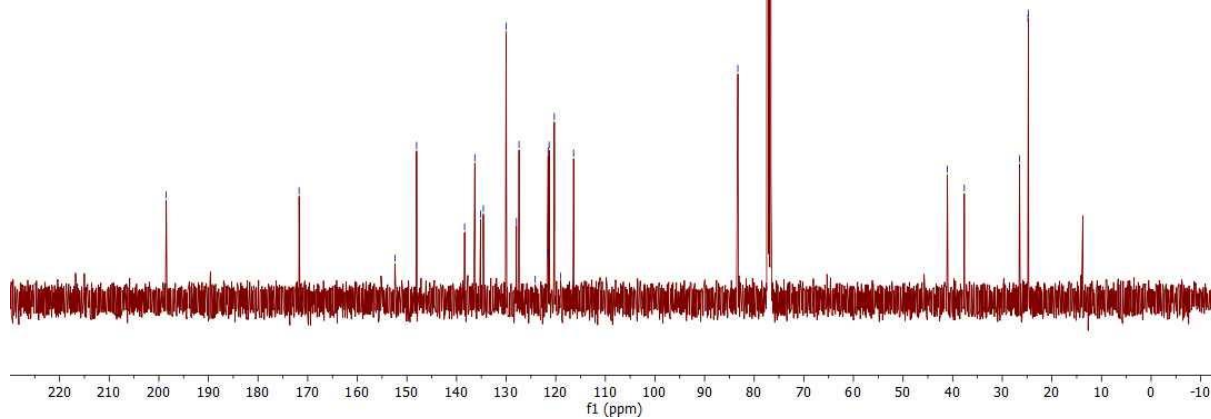

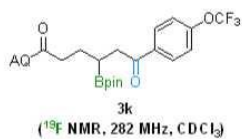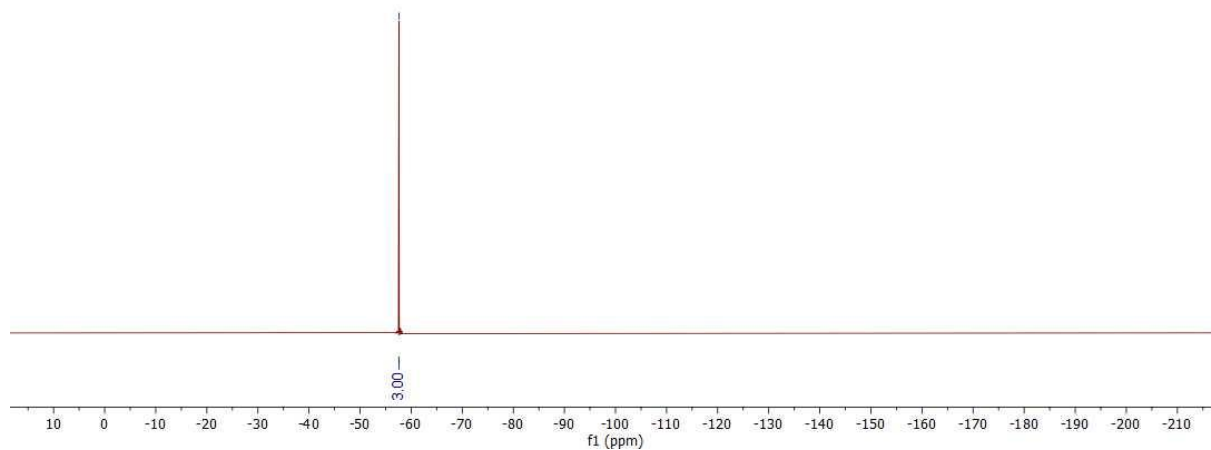

ESI-TOF Accurate Mass Report

File:21032204  
Vial:1.B.4  
Description:MeOH/0.1% HCOOH in H2O 90:10

Sample Name:Q-4  
Date:22-Mar-2021

UserName:Fu-peng Wu  
Time:11:49:55

Page 2

Sample Report:

(Time: 0.48) Combine (41:45-94:97) — Dead time test passed

1: TOF MS ES+  
5.8e+008

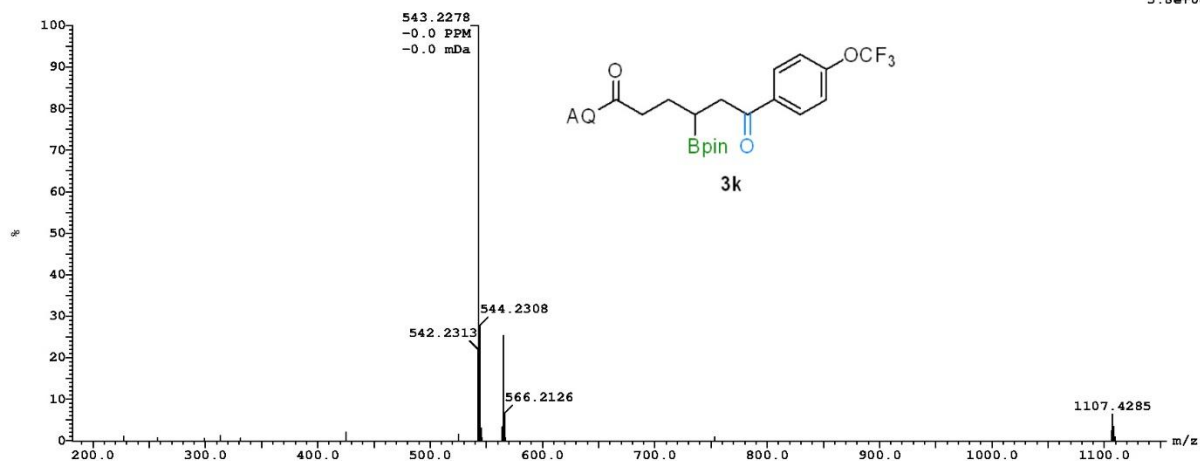

210226.f323.10.fid — Fupeng Wu Q-16 — PROTON CDCl3 {C:\Bruker\TopSpin3.6.2} 2102 23 — 300.20MHz

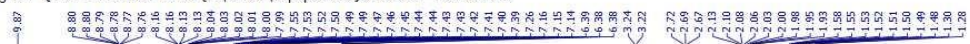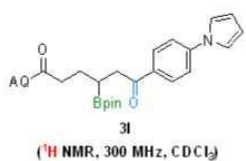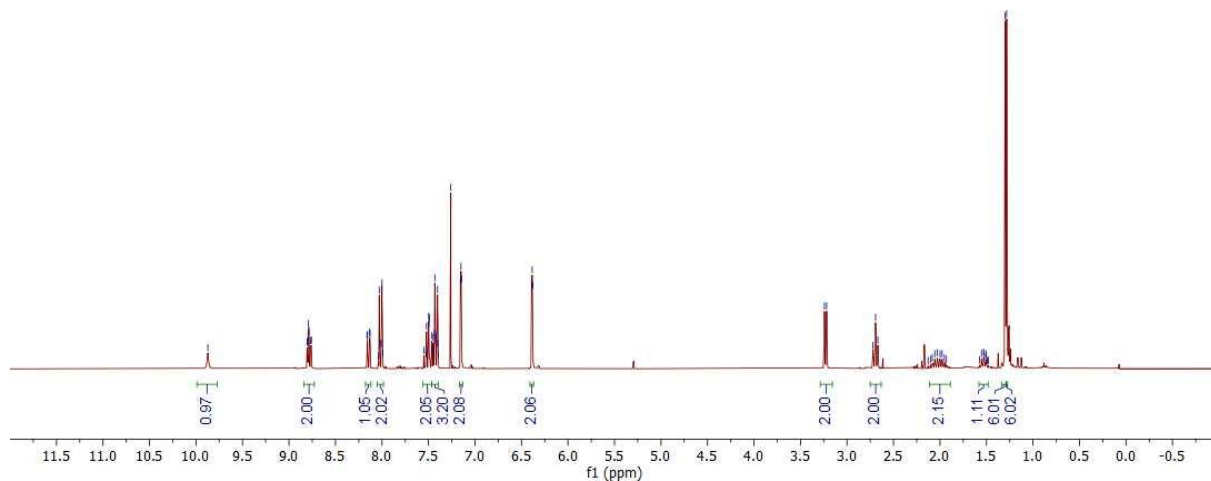

210226.f323.11.fid — Fupeng Wu Q-16 — C13CPD CDCl3 {C:\Bruker\TopSpin3.6.2} 2102 23 — 75.49MHz

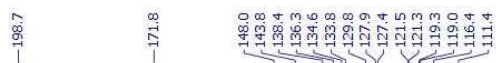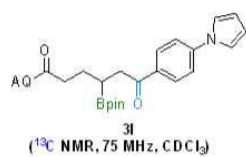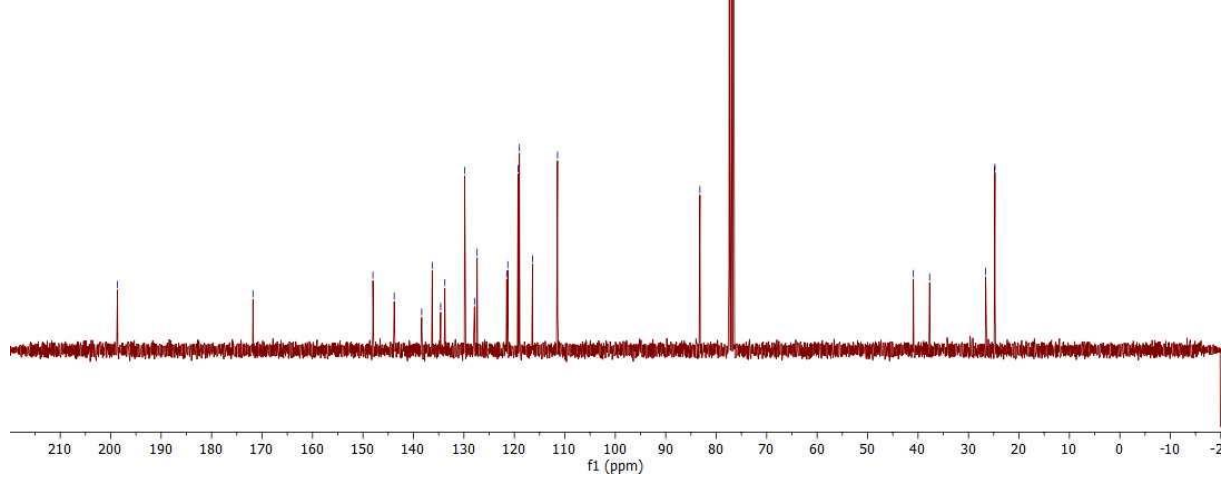

33.3

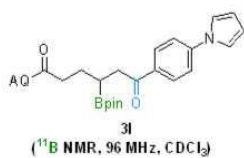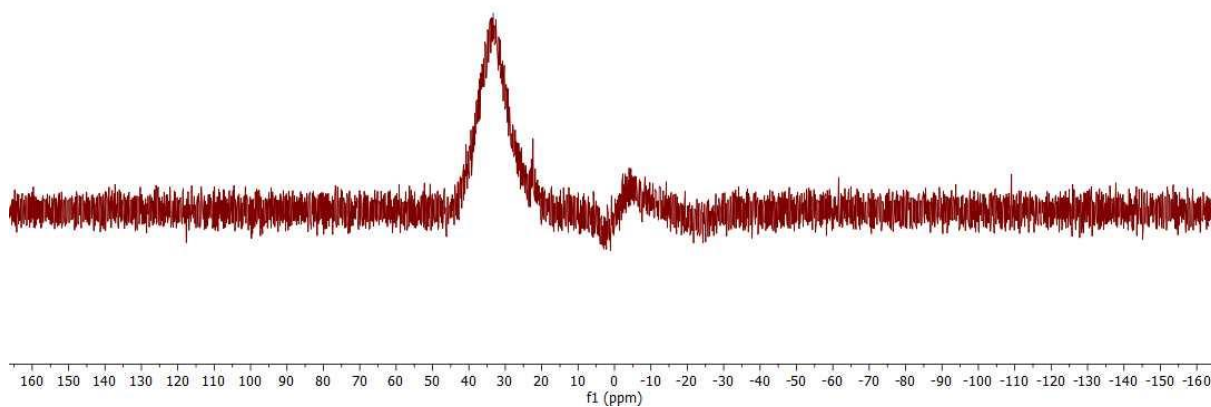

ESI-TOF Accurate Mass Report

File:21032212

Vial:1:C.4

Description:MeOH/0.1% HCOOH in H2O 90:10

Sample Name:Q-16

Date:22-Mar-2021

UserName:Fu-peng Wu

Time:12:26:10

Page 2

Sample Report:

(Time: 0.46) Combine (39:43-93:96) — Dead time test passed

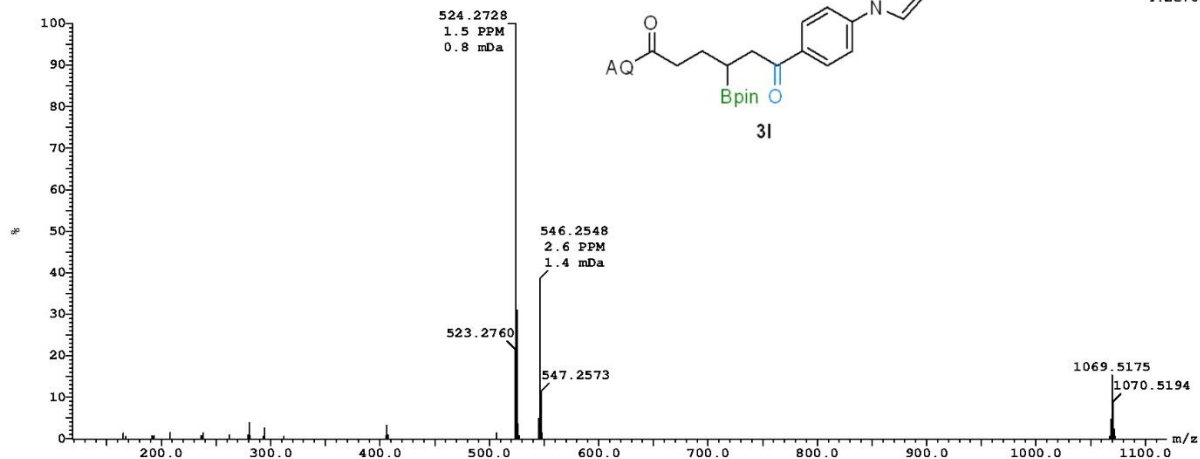

210225.f356.10.fid — Fupeng Wu Q-7-1 — PROTON CDCl<sub>3</sub> {C:\Bruker\TopSpin3.6.2} 2102 56 — 300.20MHz

9.86, 8.80, 8.79, 8.28, 8.26, 8.25, 8.16, 8.15, 8.13, 8.12, 7.73, 7.71, 7.71, 7.59, 7.59, 7.57, 7.54, 7.53, 7.52, 7.49, 7.48, 7.46, 7.46, 7.44, 7.43, 7.36, 7.34, 7.10, 7.09, 7.08, 3.18, 3.15, 2.70, 2.67, 2.65, 2.08, 2.06, 2.02, 1.98, 1.95, 1.92, 1.91, 1.88, 1.57, 1.54, 1.53, 1.52, 1.50, 1.48, 1.28, 1.27

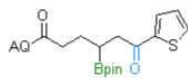

3m

(<sup>1</sup>H NMR, 300 MHz, CDCl<sub>3</sub>)

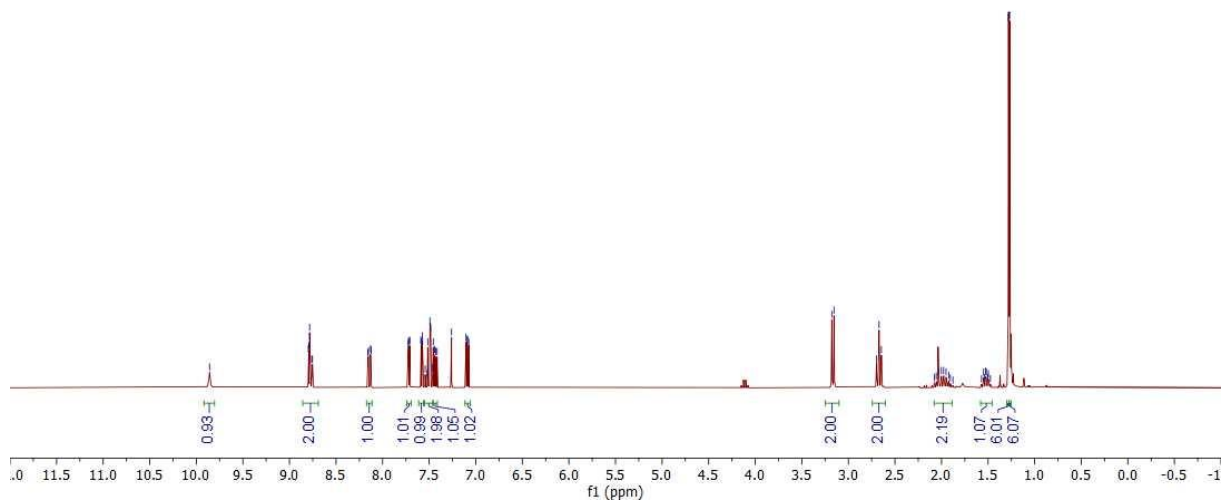

210225.f356.11.fid — Fupeng Wu Q-7-1 — C13CPD CDCl<sub>3</sub> {C:\Bruker\TopSpin3.6.2} 2102 56 — 75.49MHz

192.8, 171.7, 148.0, 144.0, 138.4, 136.3, 134.6, 133.1, 131.7, 127.9, 127.9, 127.4, 121.5, 121.3, 116.4, 83.3, 77.0 CDCl<sub>3</sub>, 41.4, 37.6, 26.6, 24.8, 24.7

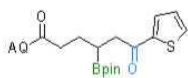

3m

(<sup>13</sup>C NMR, 75 MHz, CDCl<sub>3</sub>)

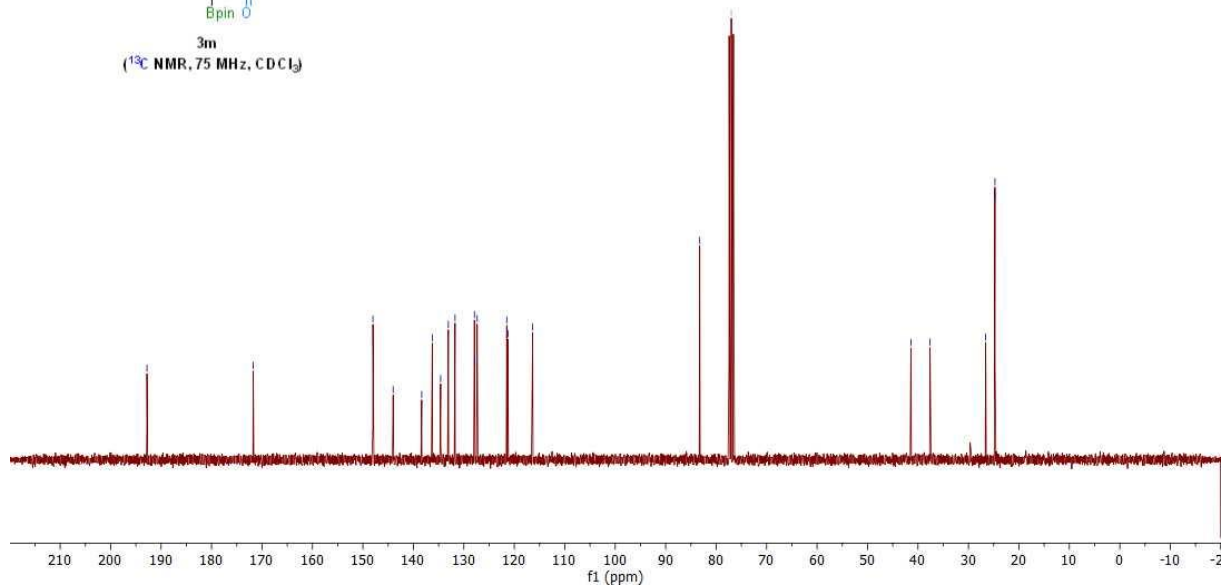

96.32

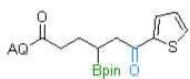

3m  
(<sup>11</sup>B NMR, 96 MHz, CDCl<sub>3</sub>)

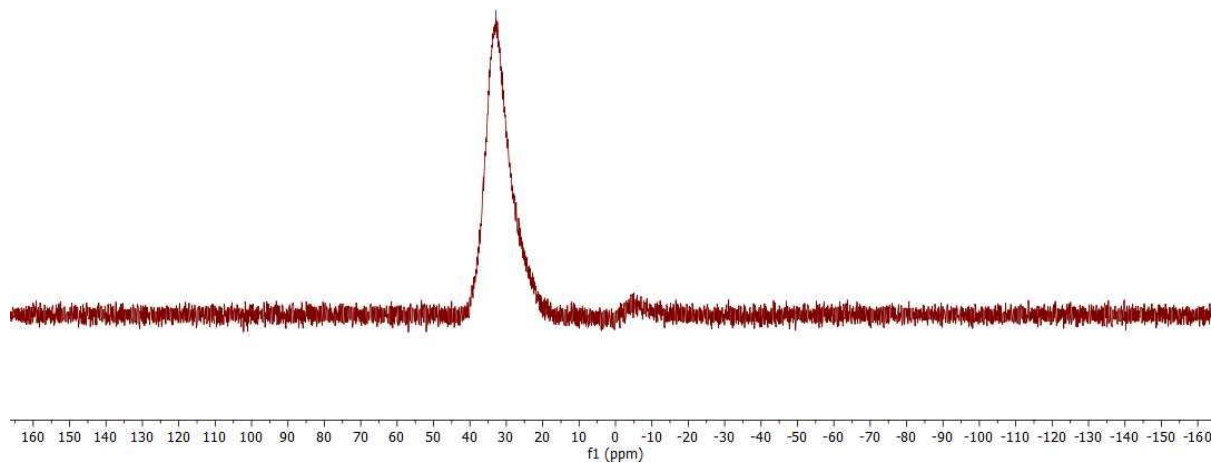

ESI-TOF Accurate Mass Report

File:21032224

Vial:1.B.6

Description:MeOH/0.1% HCOOH in H<sub>2</sub>O 90:10

Sample Name:Q-7

Date:22-Mar-2021

UserName:Fu-peng Wu

Time:15:08:12

Page 2

Sample Report:

(Time: 0.39) Combine (33:37-86:90) — Dead time test passed

1: TOF MS ES+  
3.4e+007

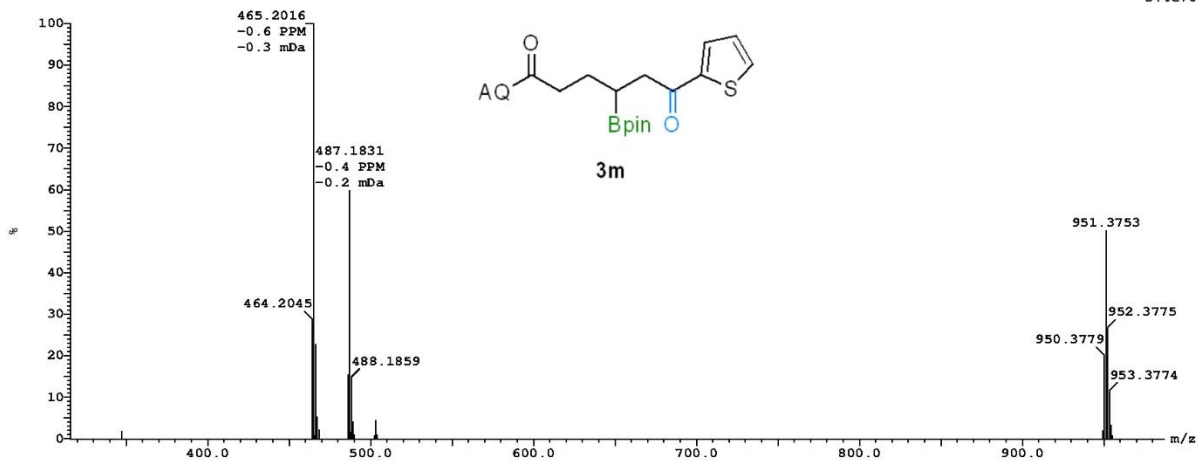

210317.331.10.fid — Fupeng Wu Q-45 — Au1H CDCl3 {C:\Bruker\TopSpin3.6.2} 2103 31 — 300.13MHz

9.86  
8.80  
8.79  
8.78  
8.78  
8.76  
8.75  
8.15  
8.15  
8.13  
8.05  
8.04  
8.04  
8.03  
8.03  
7.53  
7.53  
7.52  
7.52  
7.51  
7.49  
7.49  
7.48  
7.46  
7.44  
7.43  
7.42  
7.28  
7.28  
7.26  
7.26

3.15  
3.13  
2.70  
2.67  
2.64  
2.64  
2.05  
2.04  
2.04  
2.03  
2.02  
2.02  
2.00  
1.99  
1.97  
1.97  
1.96  
1.96  
1.94  
1.94  
1.91  
1.91  
1.50  
1.50  
1.49  
1.48  
1.28

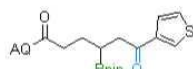

3n

(<sup>1</sup>H NMR, 300 MHz, CDCl<sub>3</sub>)

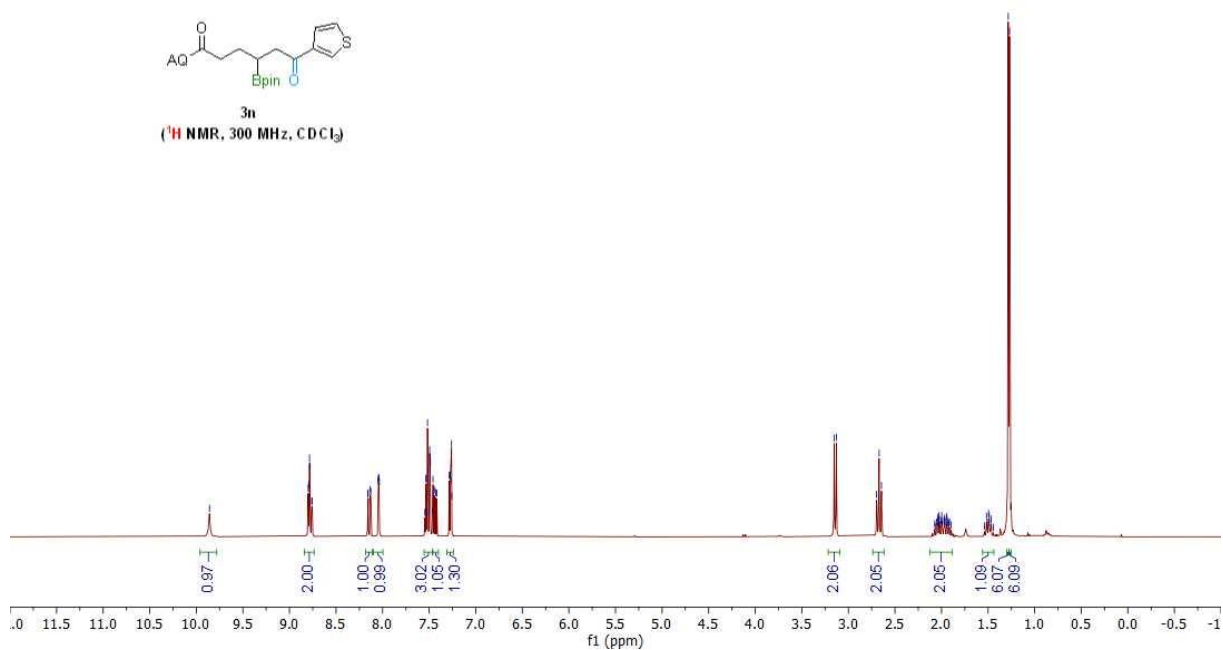

210317.331.11.fid — Fupeng Wu Q-45 — Au13C CDCl3 {C:\Bruker\TopSpin3.6.2} 2103 31 — 75.48MHz

194.3

171.8

148.0  
142.1  
138.4  
136.3  
134.6  
131.7  
127.9  
127.4  
126.9  
126.0  
121.5  
121.3  
116.4

83.2

77.0 CDCl3

42.1

37.7

26.6

24.8

24.8

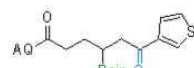

3n

(<sup>13</sup>C NMR, 75 MHz, CDCl<sub>3</sub>)

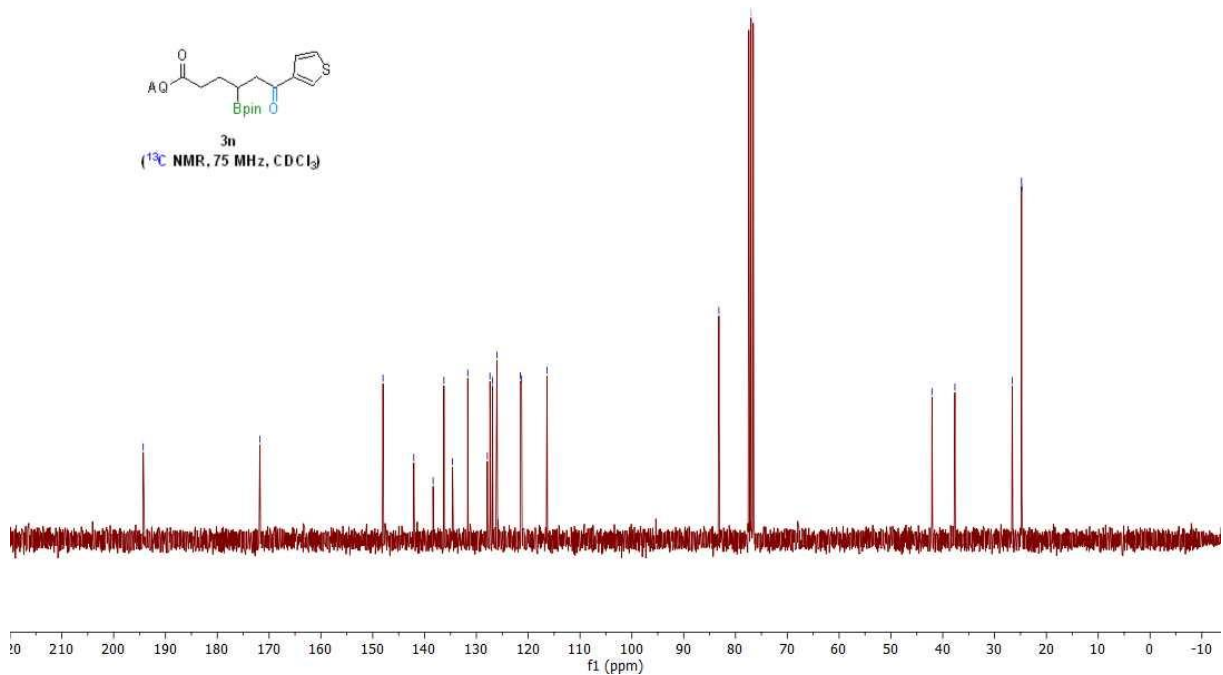



ESI-TOF Accurate Mass Report

File:21040906  
Vial:1:F,1  
Description:MeOH/0.1% HCOOH in H2O 90:10

Sample Name:Q-45  
Date:09-Apr-2021

UserName:Fupeng Wu  
Time:16:25:58

Sample Report:

(Time: 0.40) Combine (34:38-87:91) - Dead time test passed

1:TOF MS ES+  
2.1e+008

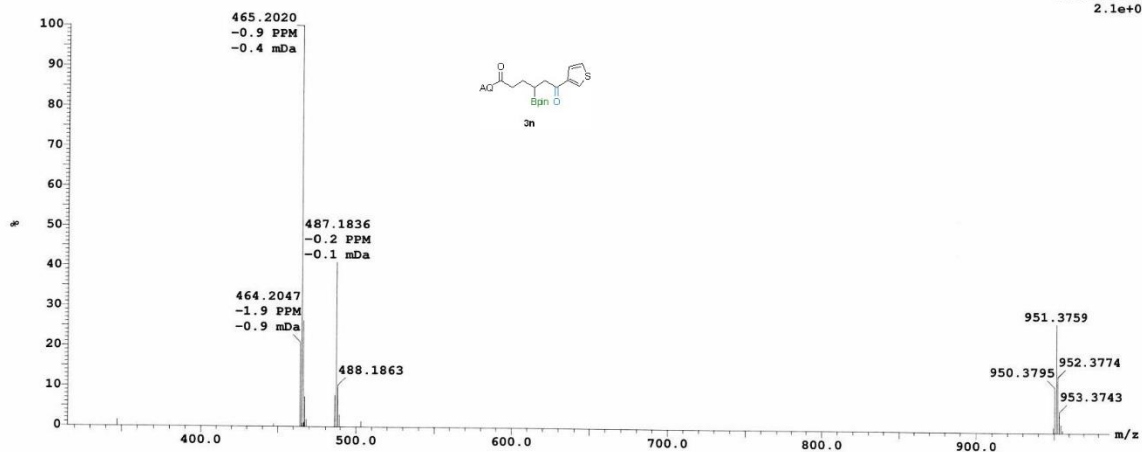



Sample Report:

(Time: 0.51) Combine (43:47-97:100) - Dead time test passed

1:TOF MS ES+  
4.6e+08

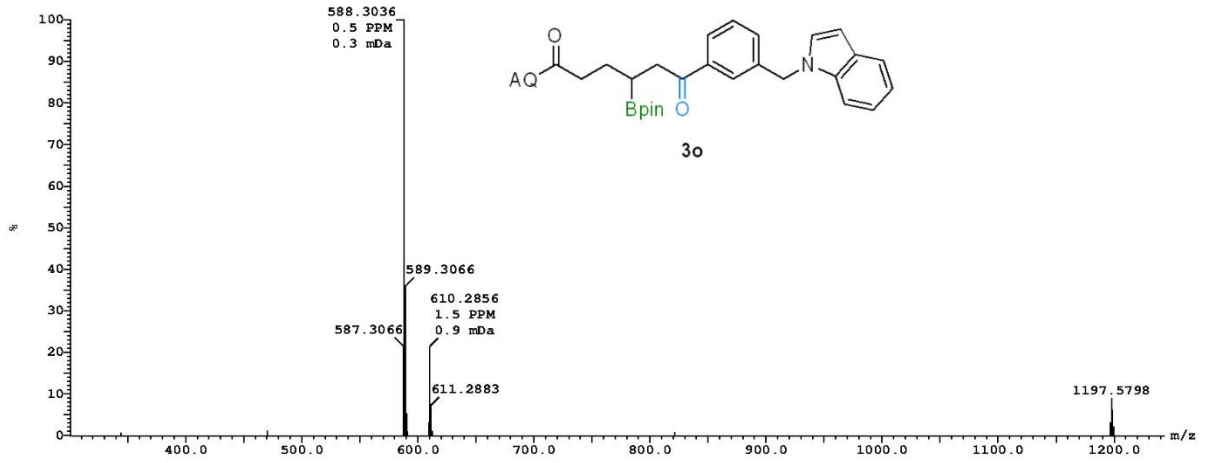

210225.f357.10.fid — Fupeng Wu Q-10-1 — PROTON CDCl<sub>3</sub> {C:\Bruker\TopSpin3.6.2} 2102 57 — 300.20MHz

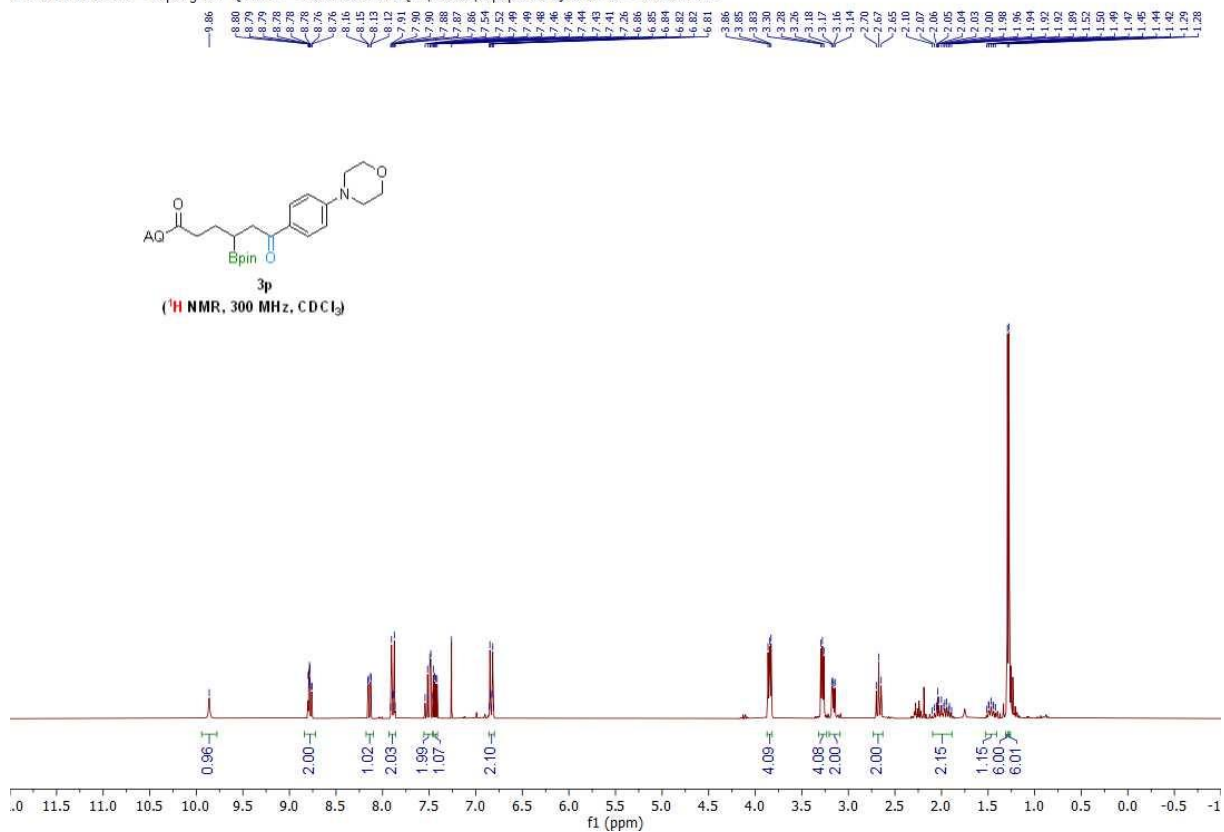

210225.f357.11.fid — Fupeng Wu Q-10-1 — CDCl<sub>3</sub> CDCl<sub>3</sub> {C:\Bruker\TopSpin3.6.2} 2102 57 — 75.49MHz

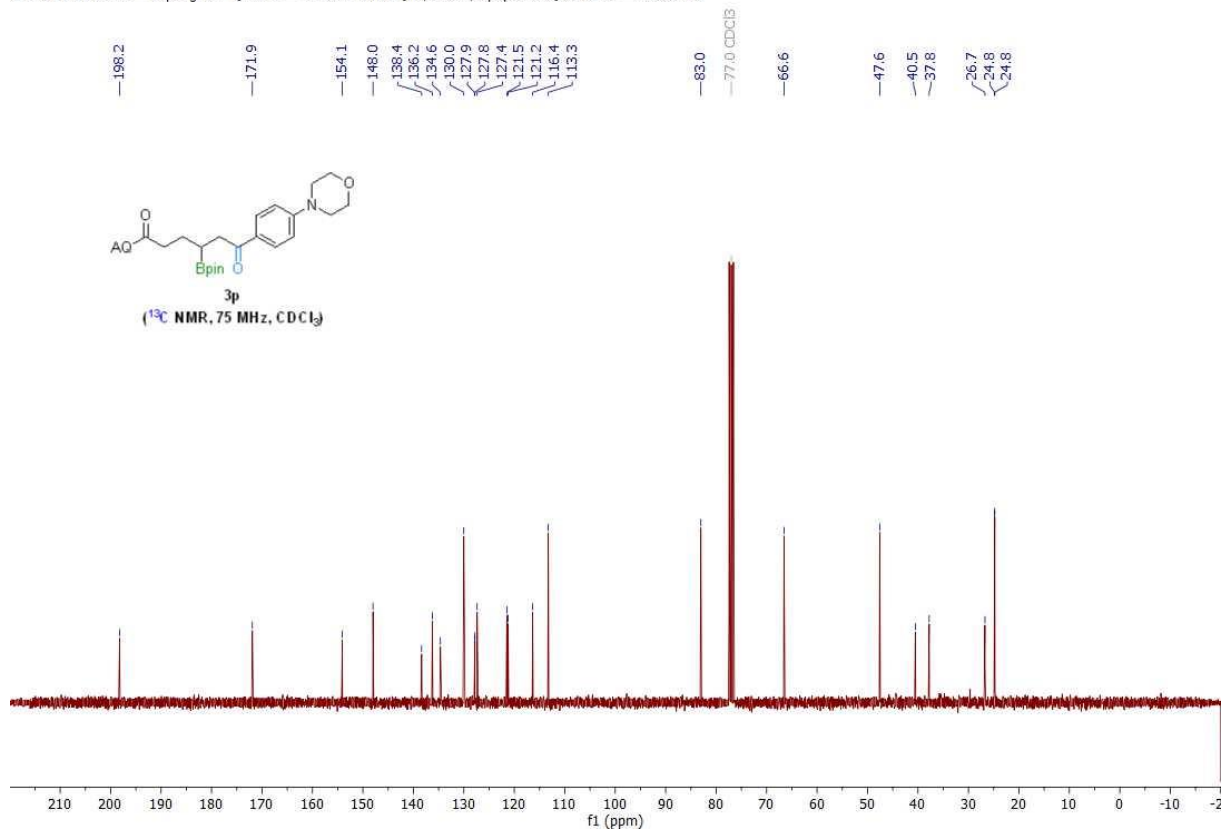

—32.7

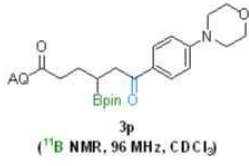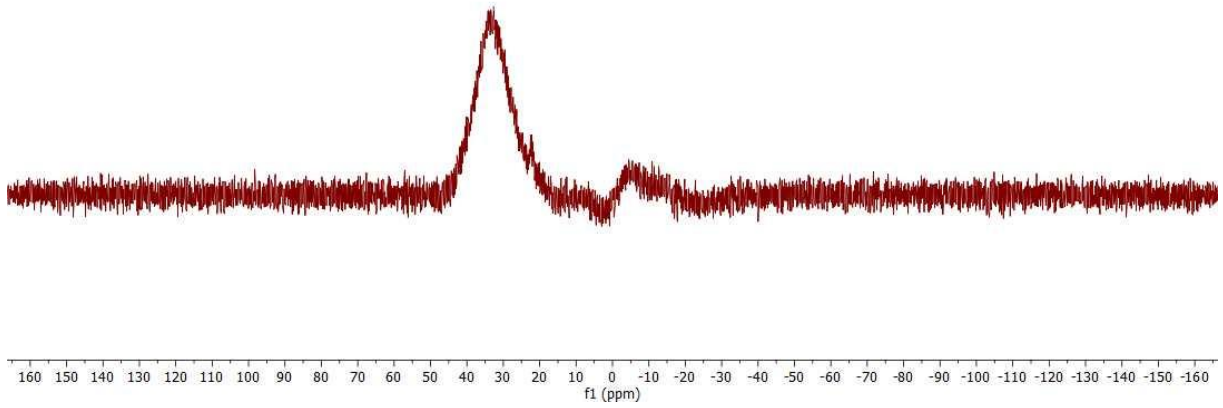

ESI-TOF Accurate Mass Report

File:21032207

Vial:1.B.7

Description:MeOH/0.1% HCOOH in H2O 90:10

Sample Name:Q-10

Date:22-Mar-2021

UserName:Fu-peng Wu

Time:12:03:24

Page 2

Sample Report:

(Time: 0.40) Combine ((33+36:39)-87:91) — Dead time test passed

1: TOF MS ES+  
3.0e+008

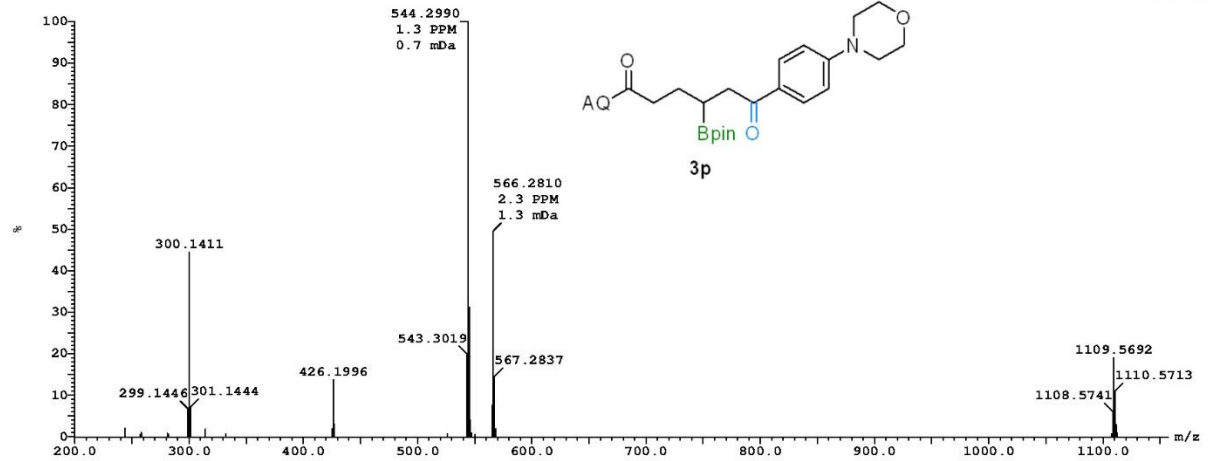

210312.F306.10.fid — Fupeng Wu Q-21-3 — PROTON CDCl3 {C:\Bruker\TopSpin3.6.2} 2103 6 — 300.20MHz

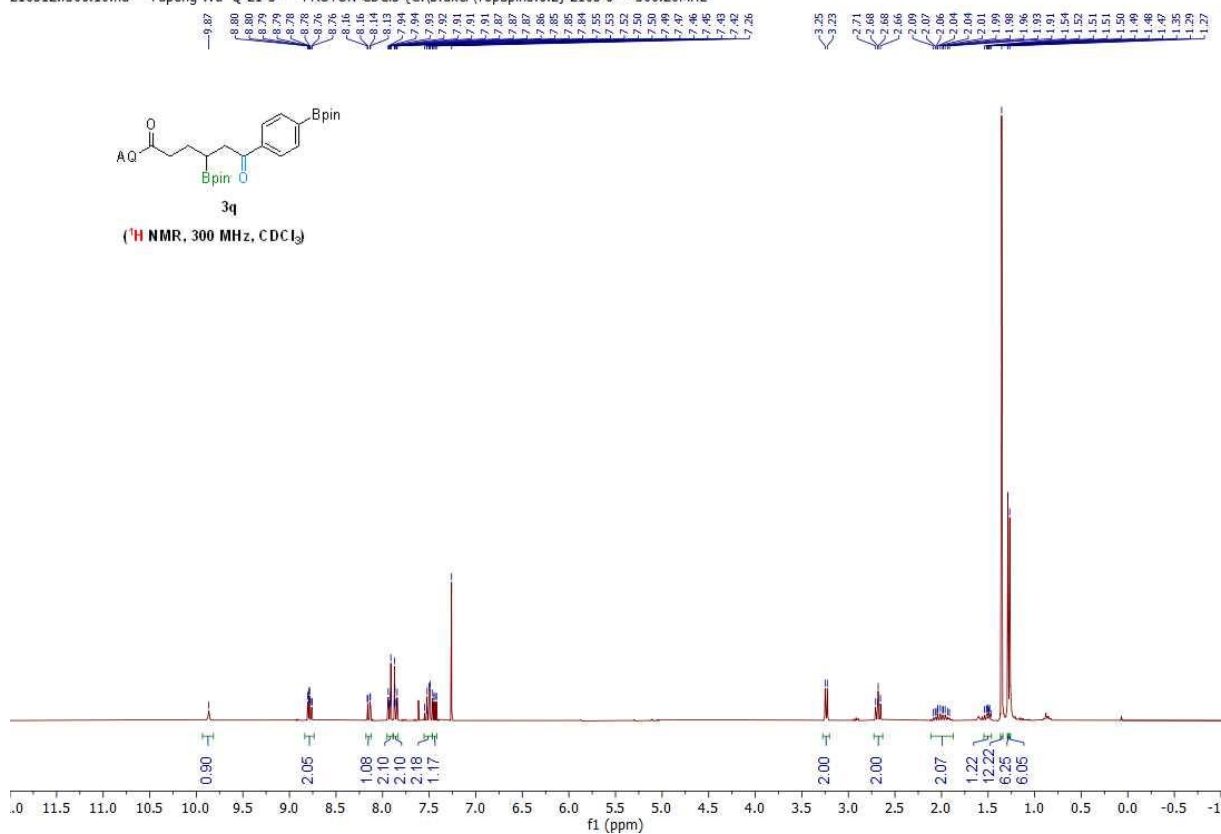

210301.416.11.fid — Fupeng Wu Q-21 — Au13C CDCl3 {C:\Bruker\TopSpin3.5pl6} 2103 16 — 100.63MHz

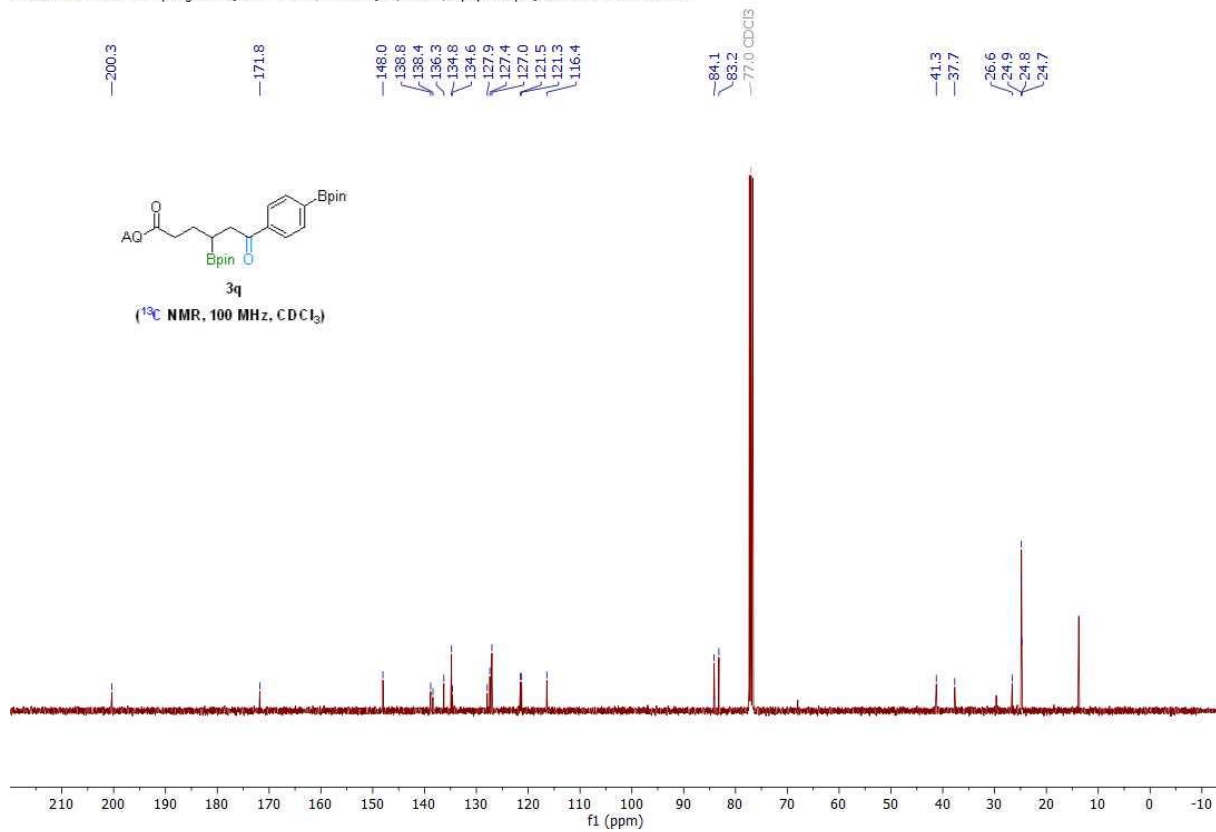

—30.3

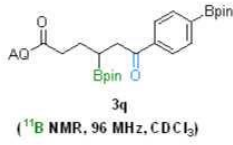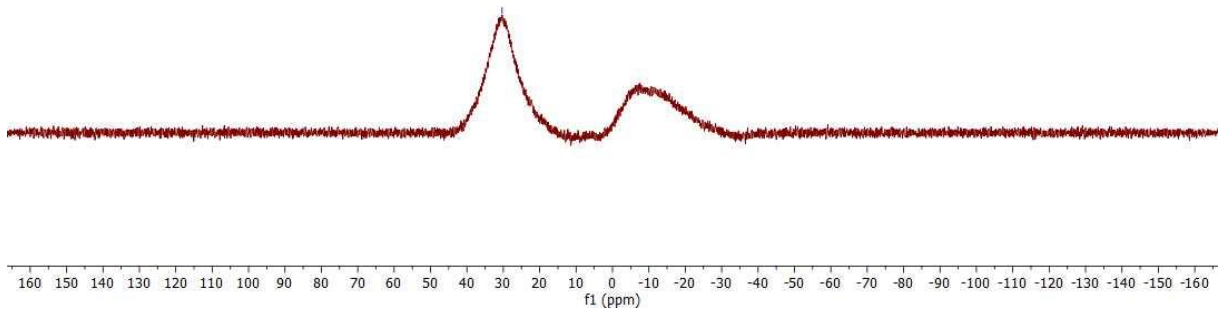

ESI-TOF Accurate Mass Report

File:21032215

Vial:1.C.7

Description:MeOH/0.1% HCOOH in H2O 90:10

Sample Name:Q-21

Date:22-Mar-2021

UserName:Fu-peng Wu

Time:12:39:34

Page 2

Sample Report:

(Time: 0.55) Combine (48:52-100:104) - Dead time test passed

1:TOF MS ES+  
4.1e+008

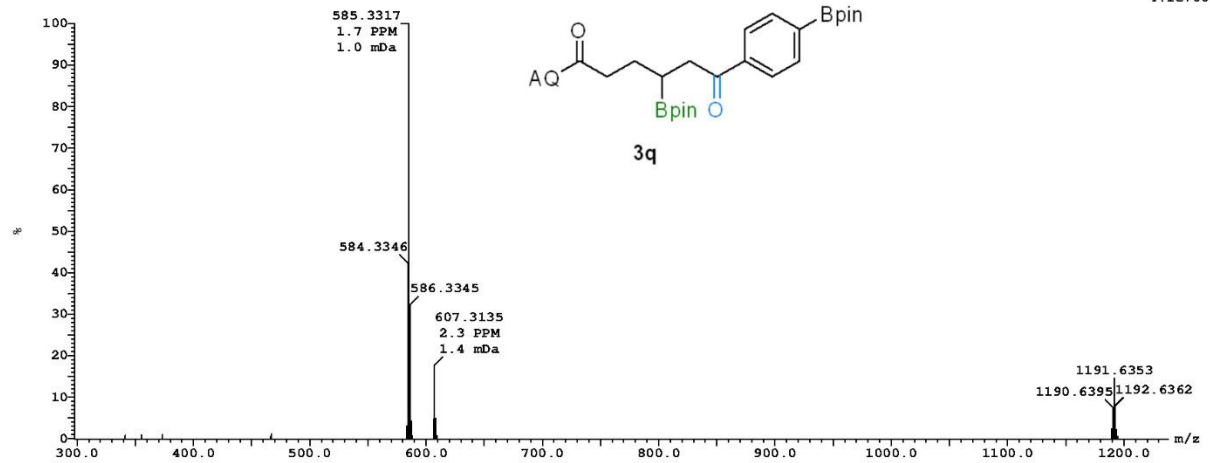





— 32.9

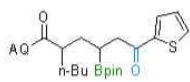

4a, (dr = 1:1)

(<sup>11</sup>B NMR, 96 MHz, CDCl<sub>3</sub>)

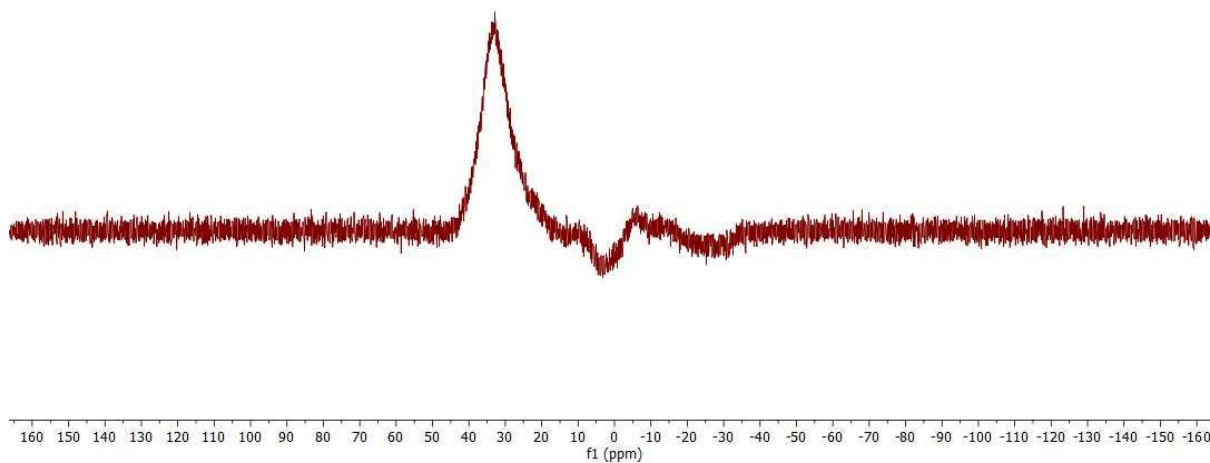

ESI-TOF Accurate Mass Report

File:21032301

Vial:1.E.5

Description:MeOH/0.1% HCOOH in H2O 98:2

Sample Name:Q-41

Date:23-Mar-2021

UserName:Fu-peng Wu

Time:09:44:30

Page 2

Sample Report:

(Time: 0.34) Combine (29:33-81:85) — Dead time test passed

1: TOF MS ES+  
5.8e+008

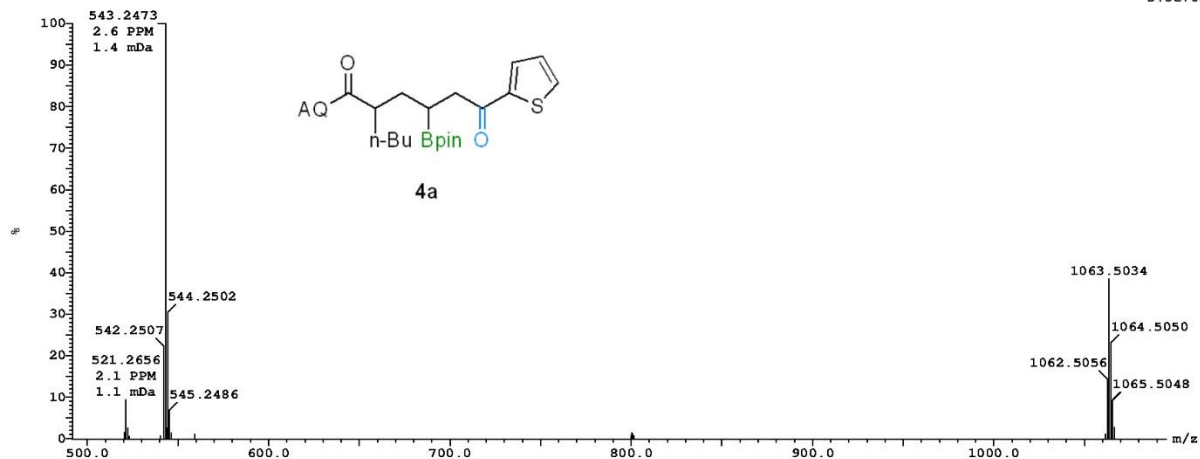

210307.353.10.fid — Fupeng Wu, Q-33 — Au1H CDCl3 {C:\Bruker\TopSpin3.6.2} 2103 53 — 300.13MHz

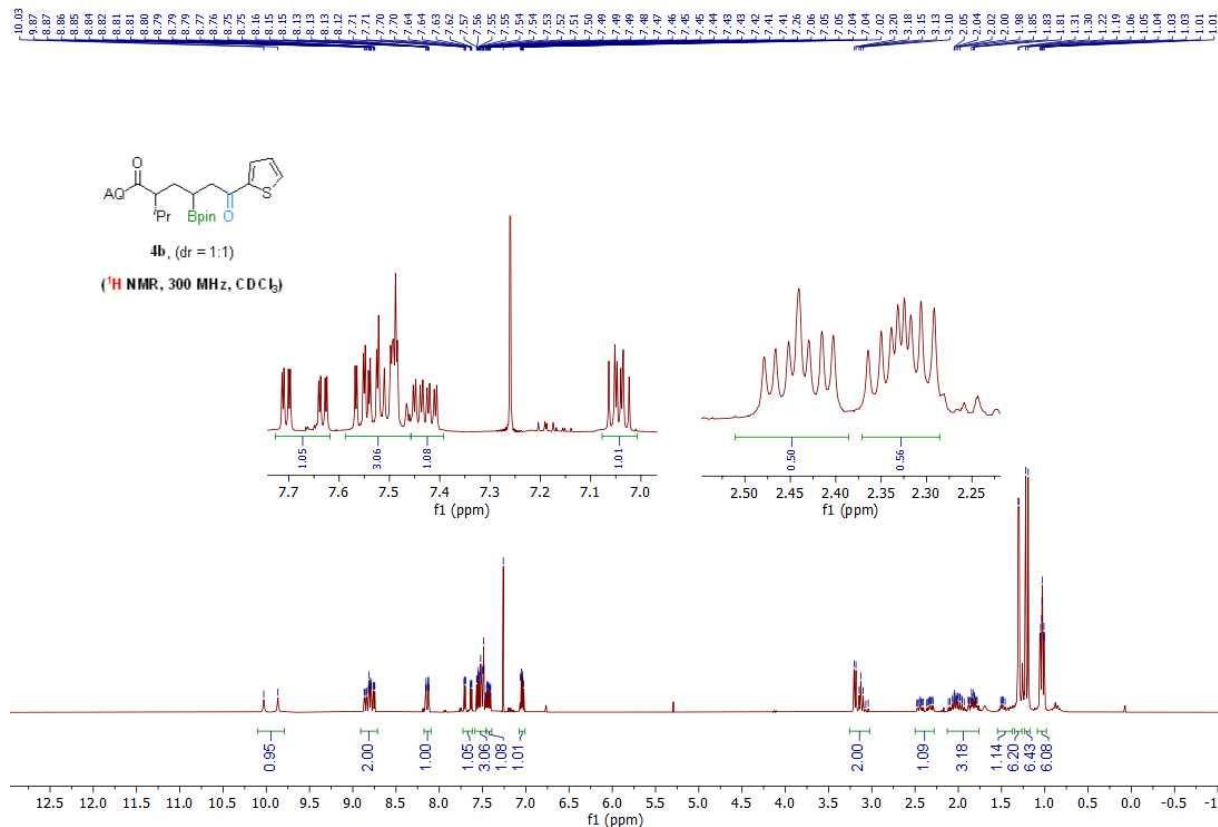

210309.f366.10.fid — Fupeng Wu, Q-33 — Cl3CPD CDCl3 {C:\Bruker\TopSpin3.6.2} 2103 6 — 75.49MHz

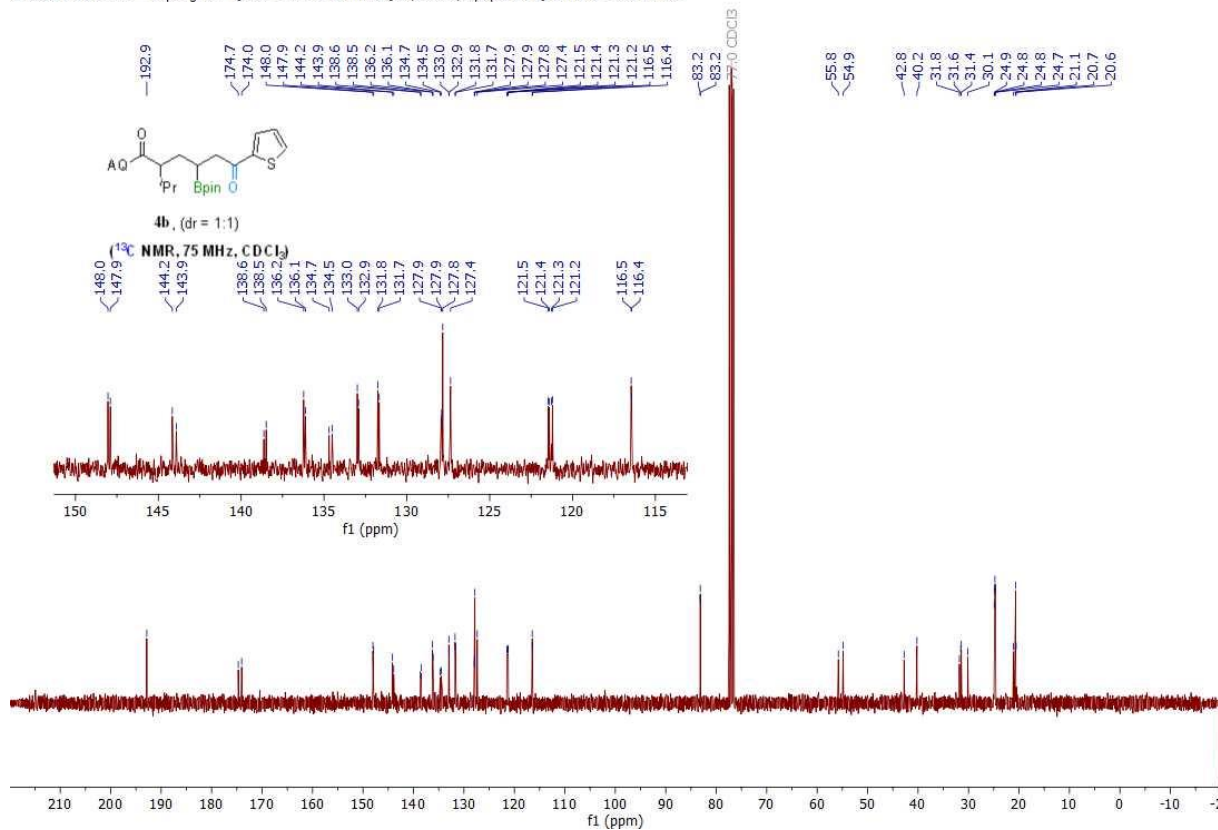

—34.3

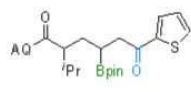

**4b**, (dr = 1:1)

(<sup>11</sup>B NMR, 96 MHz, CDCl<sub>3</sub>)

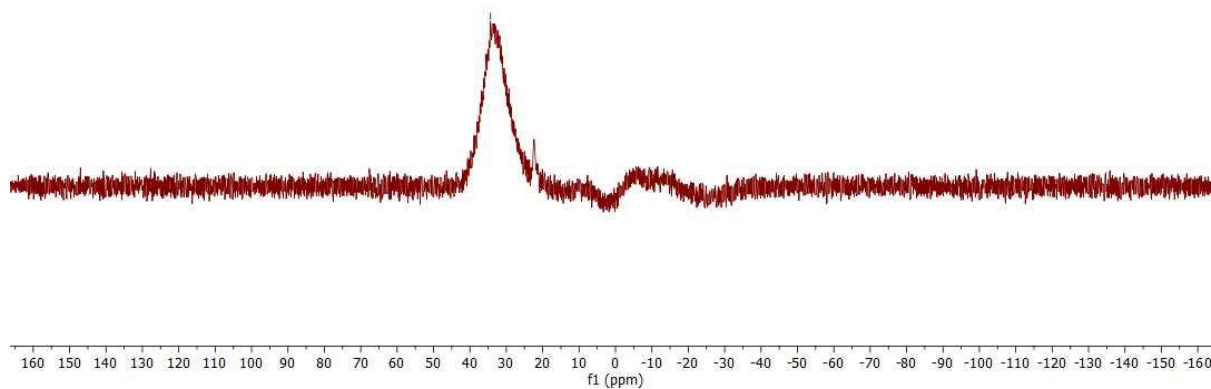

ESI-TOF Accurate Mass Report

File:21032230  
Vial:1.D.6  
Description:MeOH/0.1% HCOOH in H2O 98:2

Sample Name:Q-33  
Date:22-Mar-2021

UserName:Fu-peng Wu  
Time:15:53:18

Sample Report:

(Time: 0.34) Combine (29:33-81:85) — Dead time test passed

1: TOF MS ES+  
4.7e+008

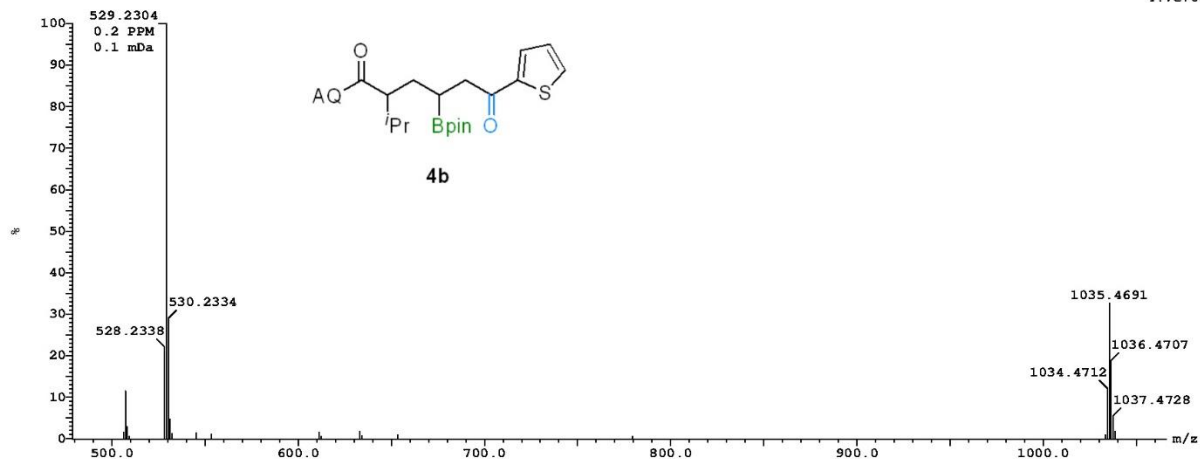



63.31

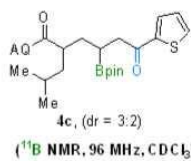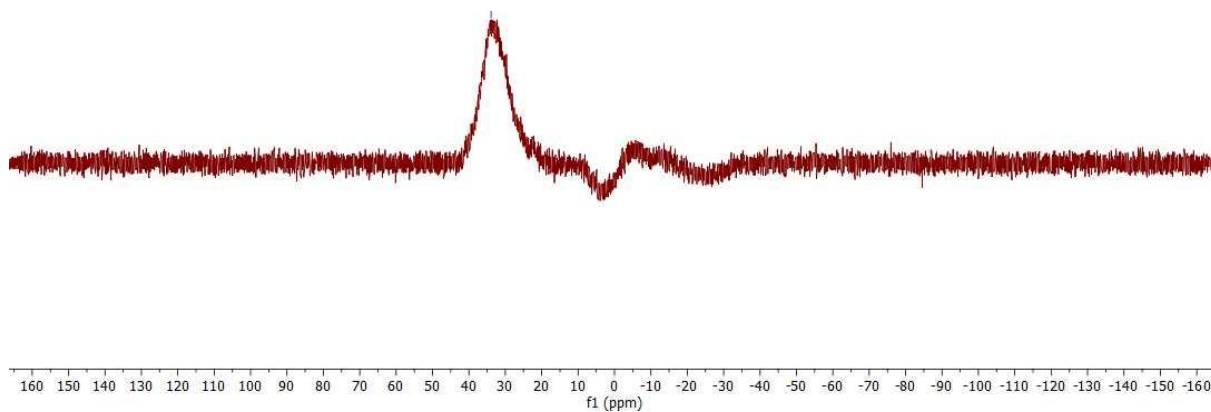

ESI-TOF Accurate Mass Report

File:21032235

Vial:1.E.3

Description:MeOH/0.1% HCOOH in H2O 98:2

Sample Name:Q-38

Date:22-Mar-2021

UserName:Fu-peng Wu

Time:16:11:20

Page 2

Sample Report:

(Time: 0.34) Combine (29:33-81:85) — Dead time test passed

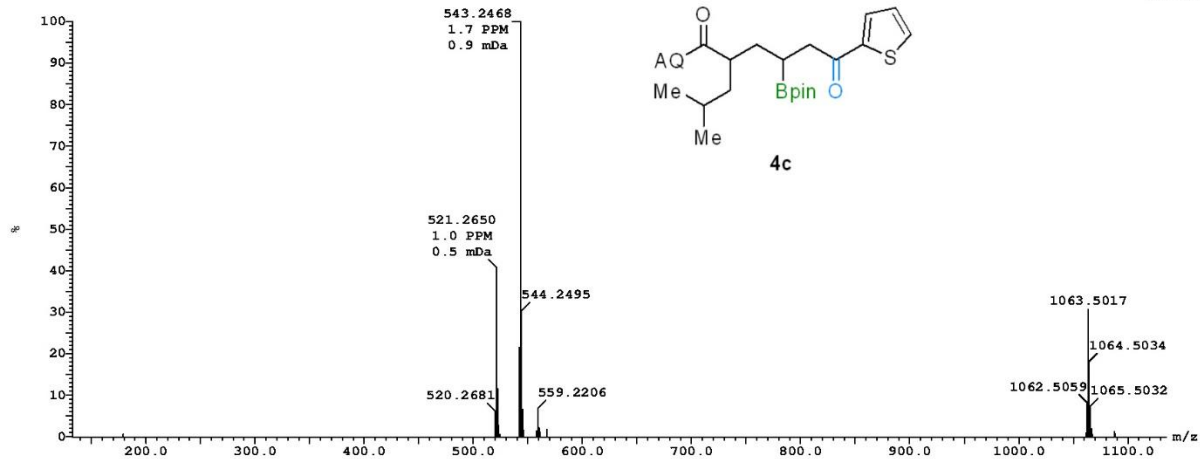

210319.307.21.fid — Fupeng Wu, Q-48 — Au1H CDCl3 {C:\Bruker\TopSpin3.6.2} 2103 7 — 300.13MHz

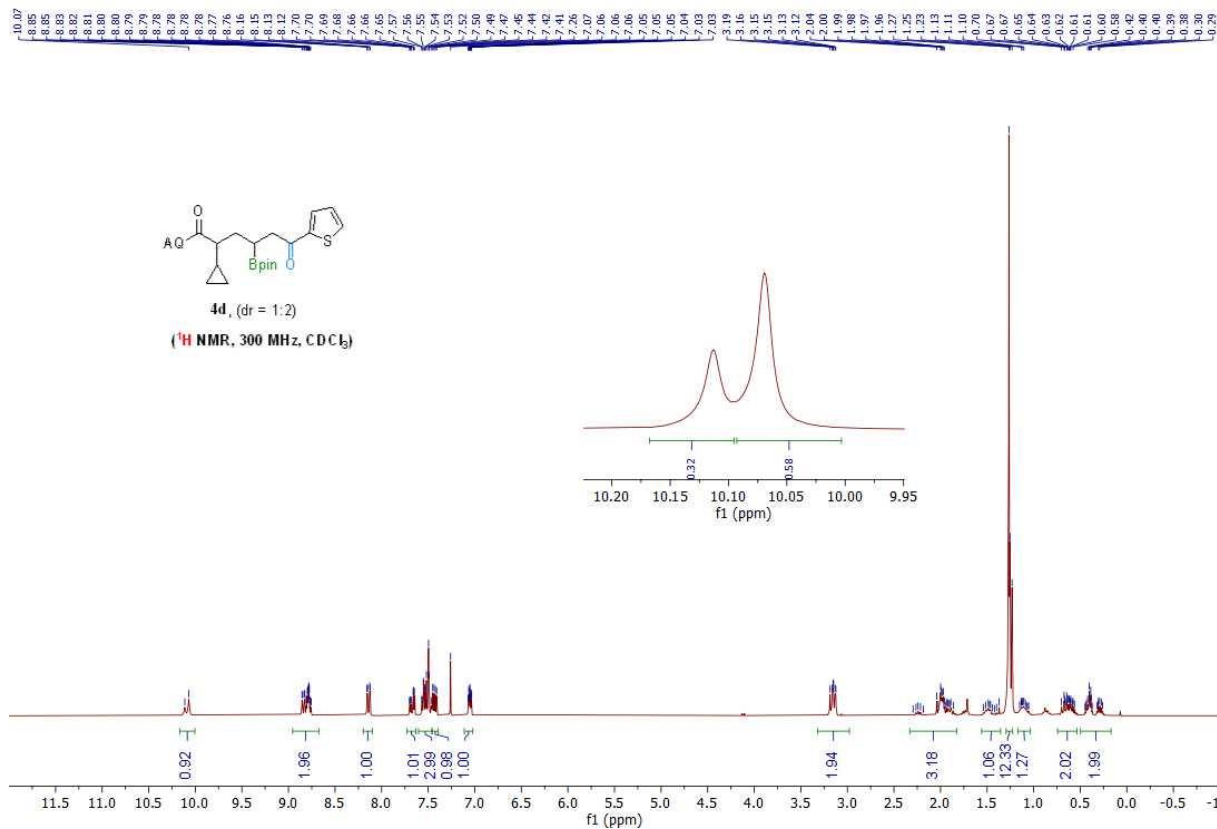

210319.307.20.fid — Fupeng Wu, Q-48 — Au13C CDCl3 {C:\Bruker\TopSpin3.6.2} 2103 7 — 75.48MHz

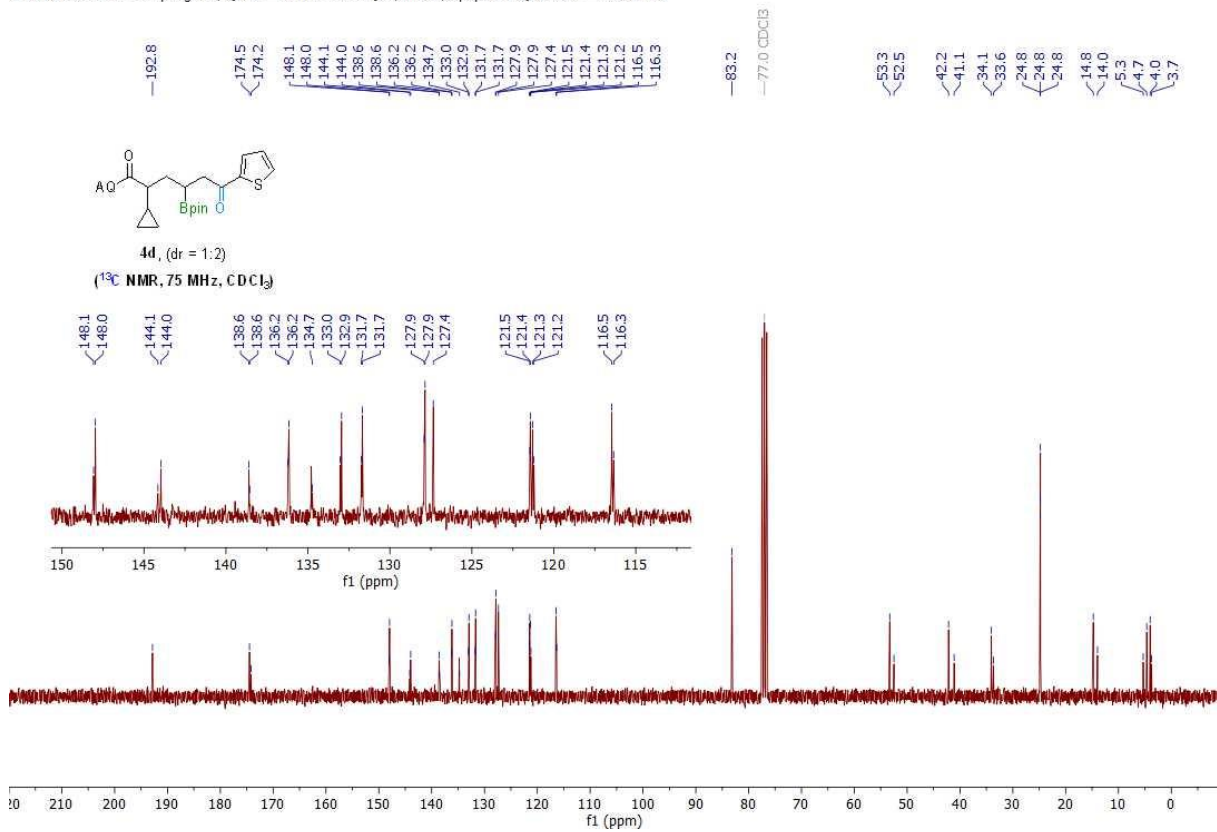

ESI-TOF Accurate Mass Report

File:21040907

Vial:1.F.2

Description:MeOH/0.1% HCOOH in H2O 90:10

Sample Name:Q-48

Date:09-Apr-2021

UserName:Fupeng Wu

Time:15:16:02

Page 2

Sample Report:

(Time: 0.45) Combine ((38:39+41:43)-92:96) - Dead time test passed

1: TOF MS ES+  
8.0e+008

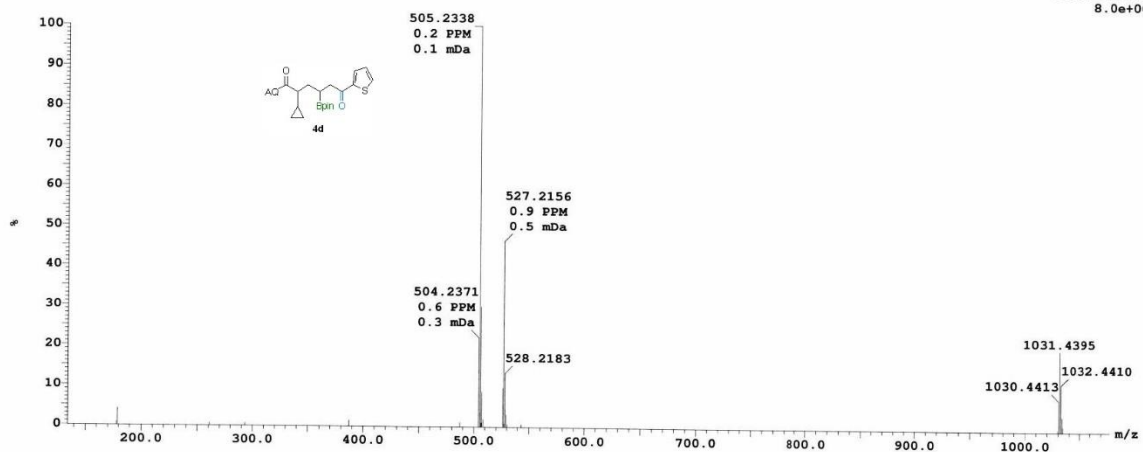

210616.432.10.fid — Fupeng Wu Q-37-2 — Au1H CDCl3 {C:\Bruker\TopSpin3.5pl6} 2106 32 — 400.13MHz

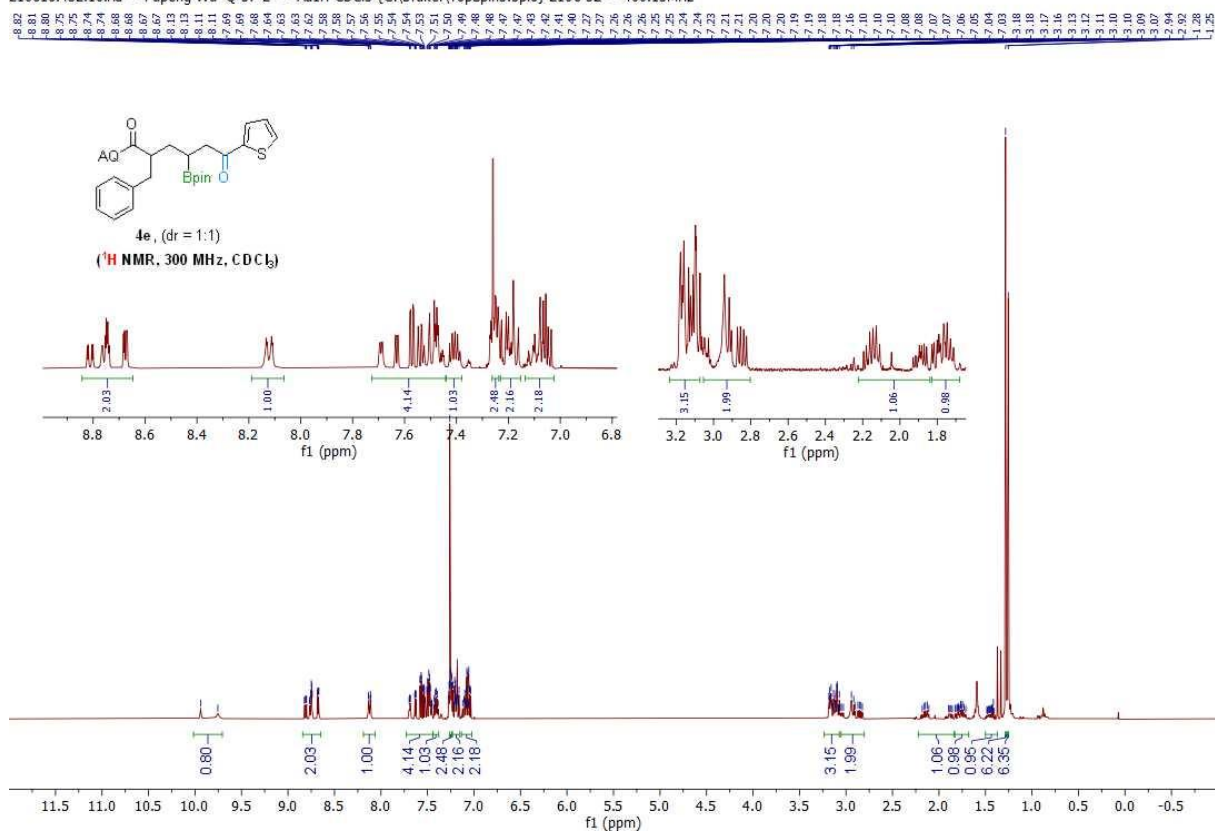

210310.f308.10.fid — Fupeng Wu Q-37 — Cl13CPD CDCl3 {C:\Bruker\TopSpin3.6.2} 2103 8 — 75.49MHz

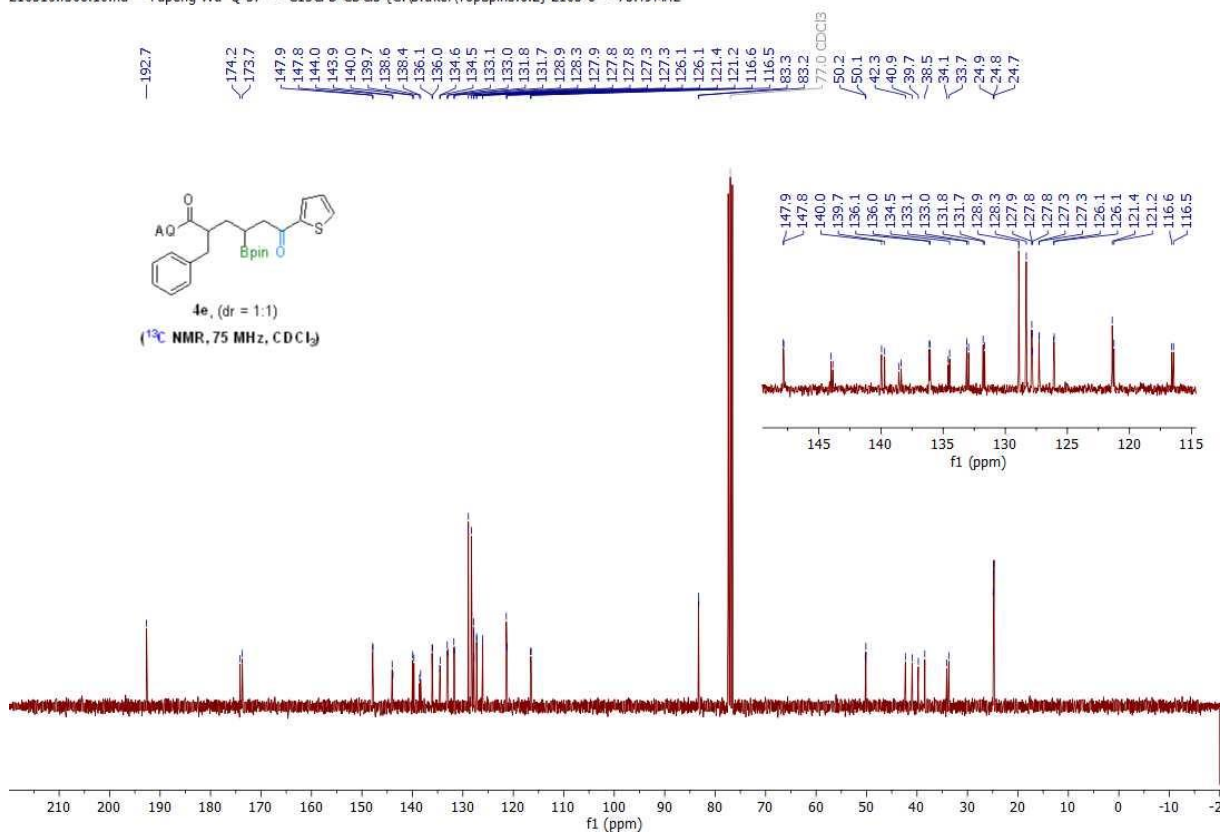



— 33.4

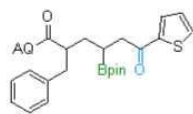

4e, (dr = 1:1)

(<sup>13</sup>B NMR, 96 MHz, CDCl<sub>3</sub>)

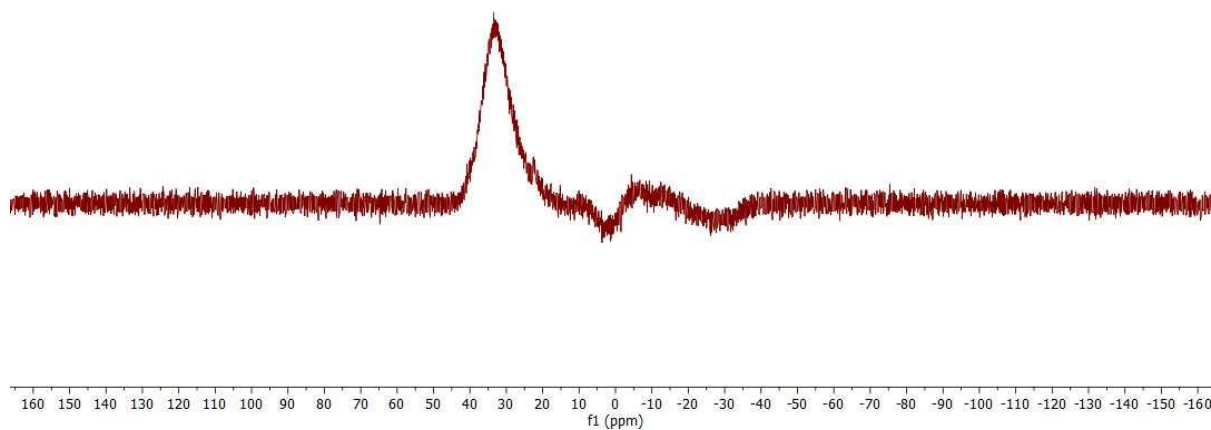

ESI-TOF Accurate Mass Report

File:21032234

Vial:1.E.2

Description:MeOH/0.1% HCOOH in H2O 98:2

Sample Name:Q-37

Date:22-Mar-2021

UserName:Fu-peng Wu

Time:16:08:45

Page 2

Sample Report:

(Time: 0.33) Combine (28:32-80:84) — Dead time test passed

1: TOF MS ES+  
3.1e+008

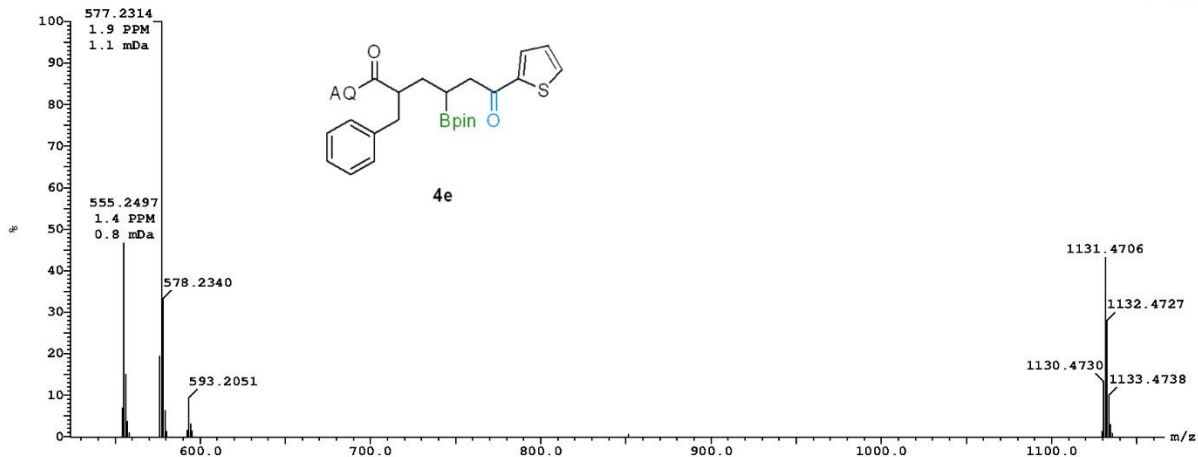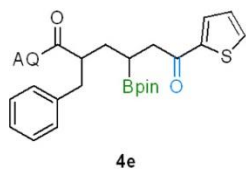

210307.356.10.fid — Fupeng Wu, Q-36 — Au1H CDCl<sub>3</sub> {C:\Bruker\TopSpin3.6.2} 2103 56 — 300.13MHz

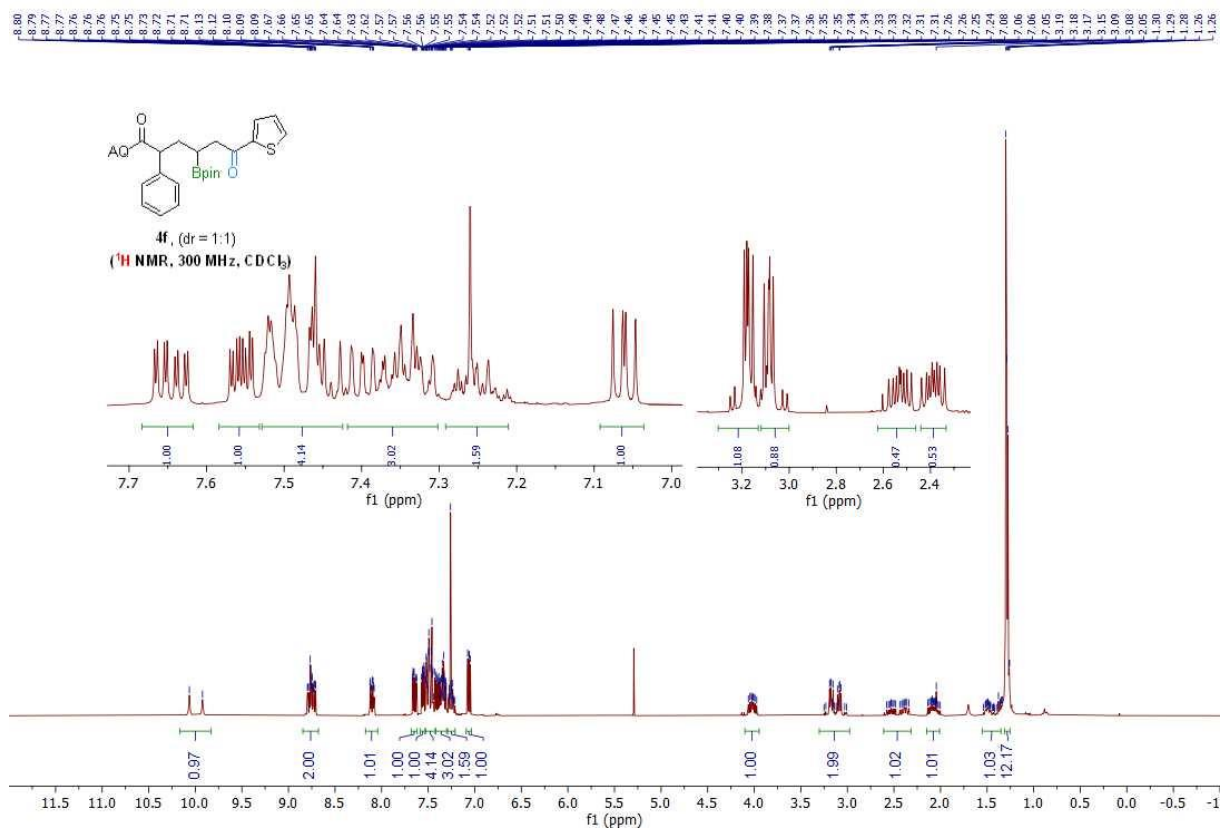

210310.f307.10.fid — Fupeng Wu, Q-36 — Cl3CPD CDCl<sub>3</sub> {C:\Bruker\TopSpin3.6.2} 2103 7 — 75.49MHz

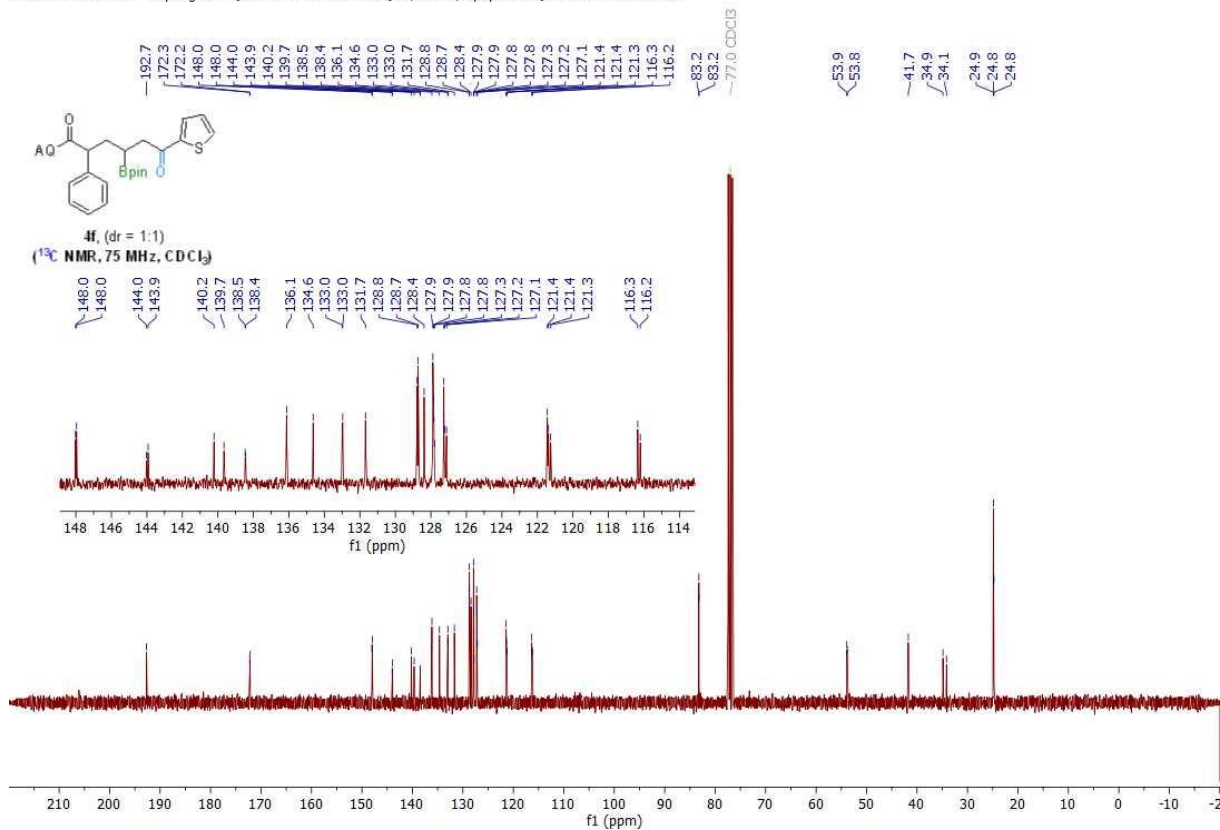

— 33.4

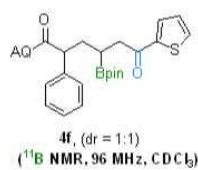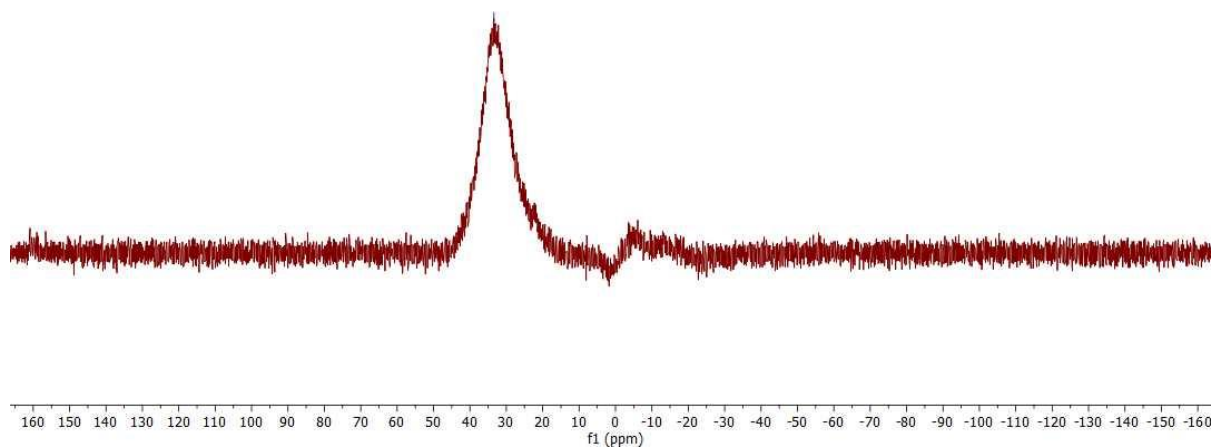

**ESI-TOF Accurate Mass Report**

File:21032233  
 Vial:1.E.1  
 Description:MeOH/0.1% HCOOH in H2O 98:2

Sample Name:Q-36  
 Date:22-Mar-2021

UserName:Fu-peng Wu  
 Time:16:06:10

**Sample Report:**

(Time: 0.33) Combine (28:32-80:84) — Dead time test passed

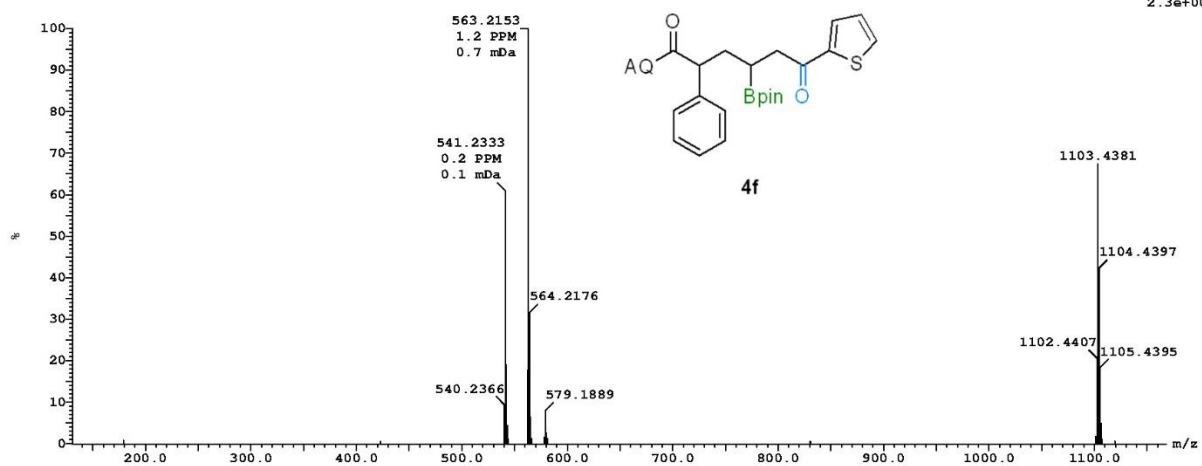

210303.F372.10.fid — Fupeng Wu Q-32 — PROTON CDCl3 {C:\Bruker\TopSpin3.6.2} 2103 12 — 300.20MHz

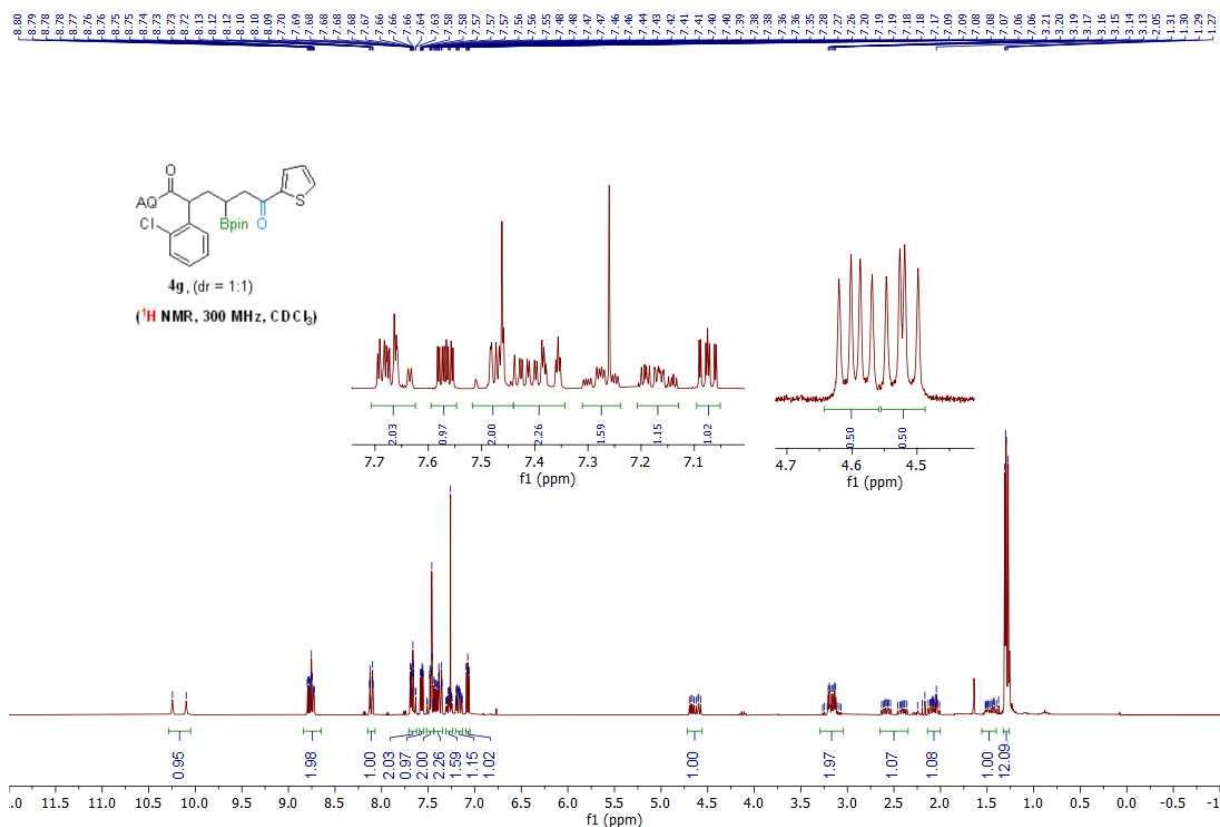

210303.F372.11.fid — Fupeng Wu Q-32 — <sup>13</sup>C NMR CDCl3 {C:\Bruker\TopSpin3.6.2} 2103 12 — 75.49MHz

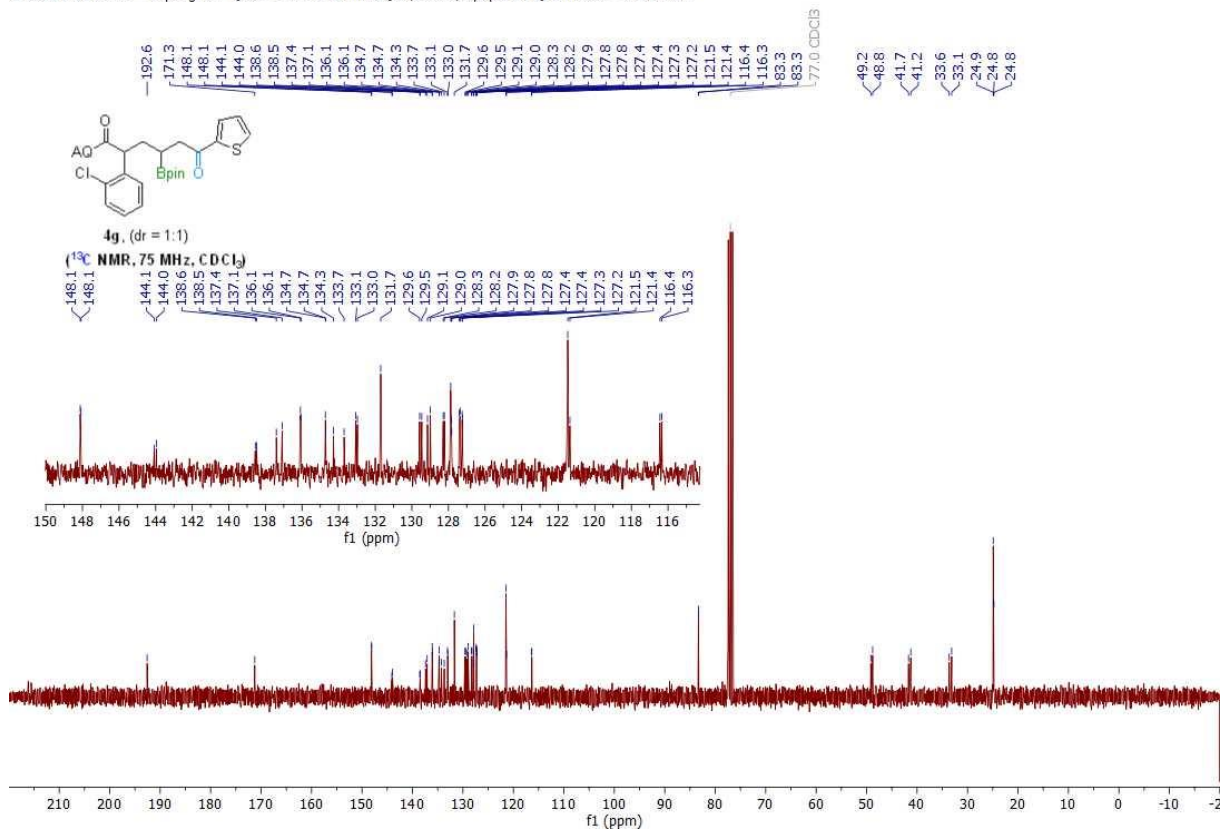

33.6

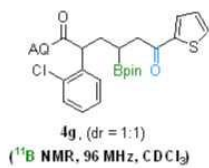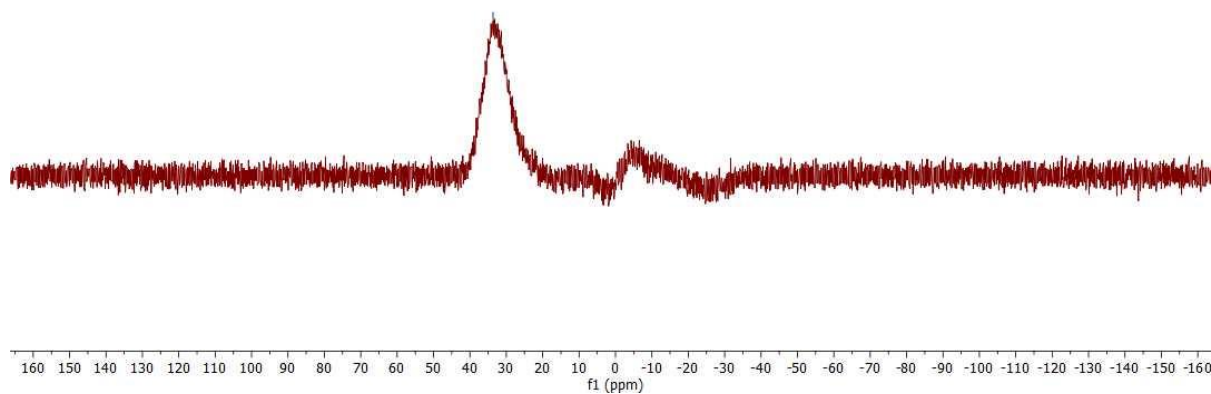

ESI-TOF Accurate Mass Report

File:21032222  
 Vial:1.D.6  
 Description:MeOH/0.1% HCOOH in H2O 90:10

Sample Name:Q-32  
 Date:22-Mar-2021

UserName:Fu-peng Wu  
 Time:15:19:55

Sample Report:

(Time: 0.53) Combine (45:49-98:102) — Dead time test passed

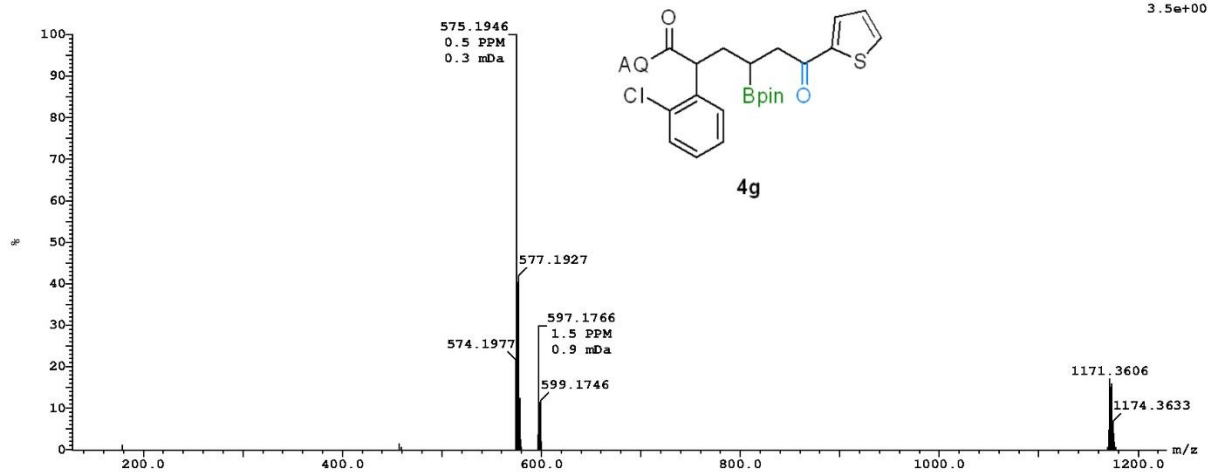

210307.354.10.fid — Fupeng Wu, Q-34 — Au1H CDCl3 {C:\Bruker\TopSpin3.6.2} 2103 54 — 300.13MHz

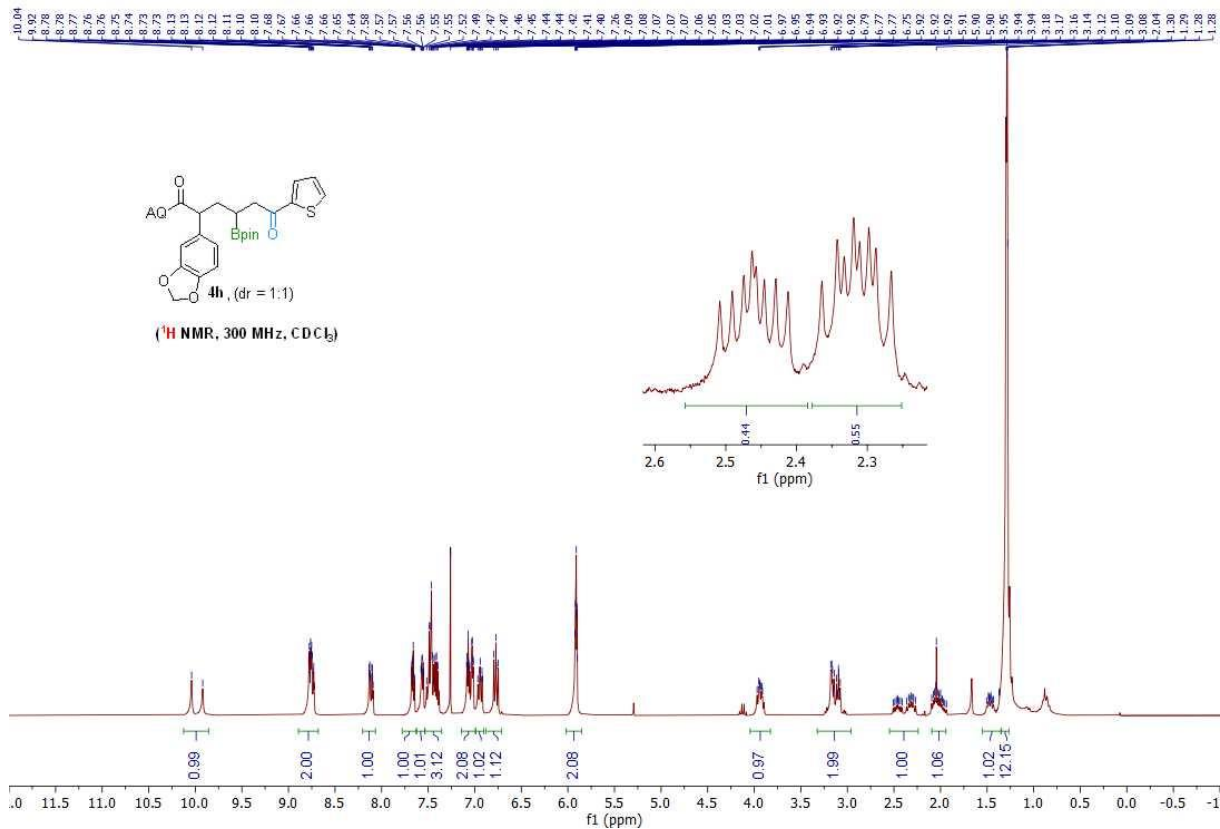

210310.f304.10.fid — Fupeng Wu, Q-34 — C13CPD CDCl3 {C:\Bruker\TopSpin3.6.2} 2103 4 — 75.49MHz

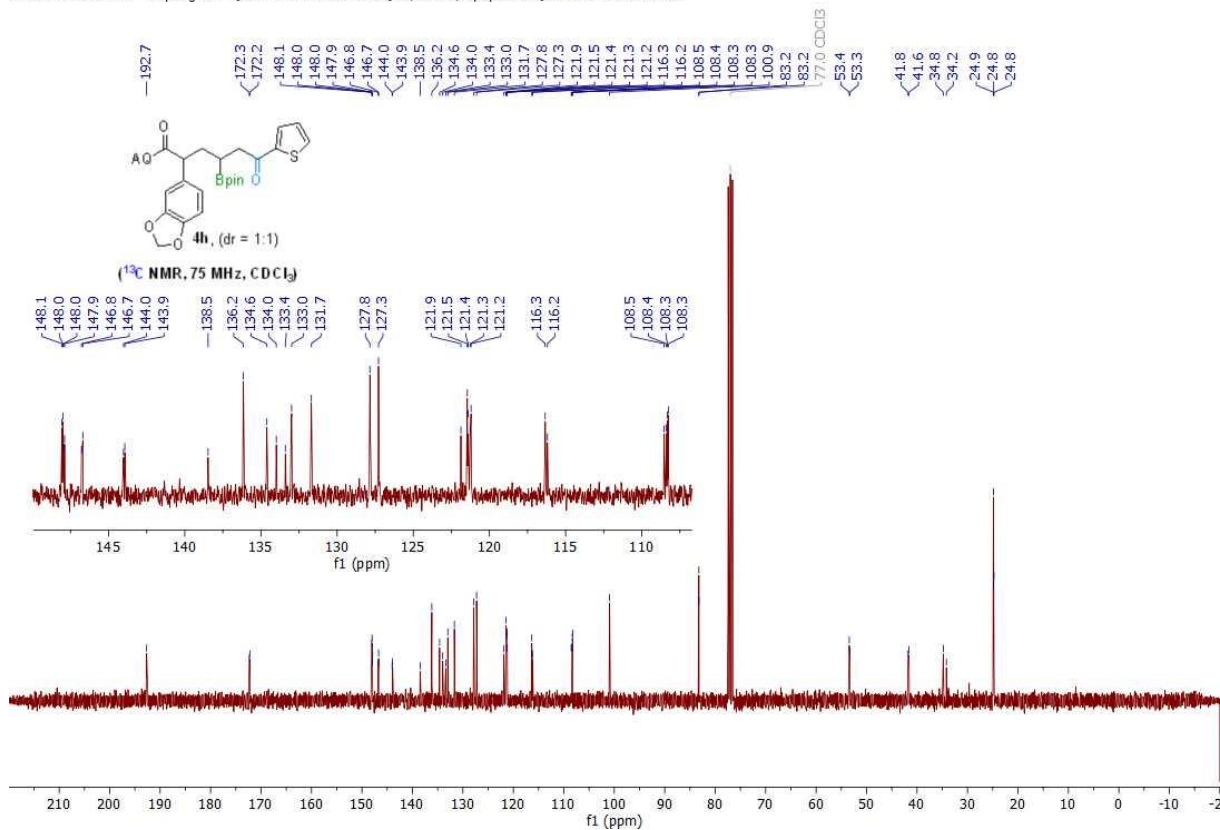

— 32.5

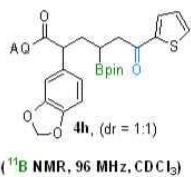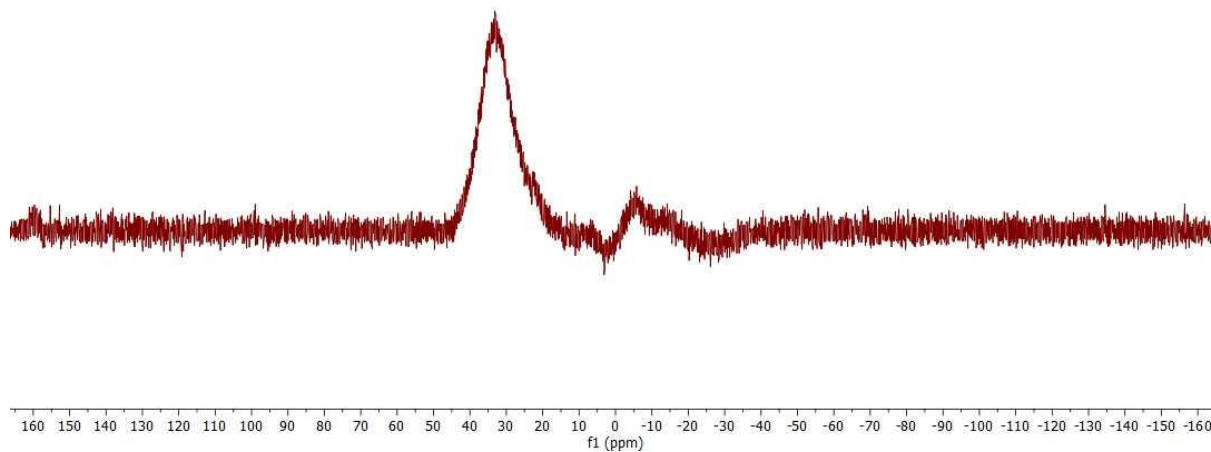

ESI-TOF Accurate Mass Report

File:21032231  
 Vial:1.D.7  
 Description:MeOH/0.1% HCOOH in H2O 98:2

Sample Name:Q-34  
 Date:22-Mar-2021

UserName:Fu-peng Wu  
 Time:16:01:07

Page 2

Sample Report:

(Time: 0.32) Combine (27:31-79:83) — Dead time test passed

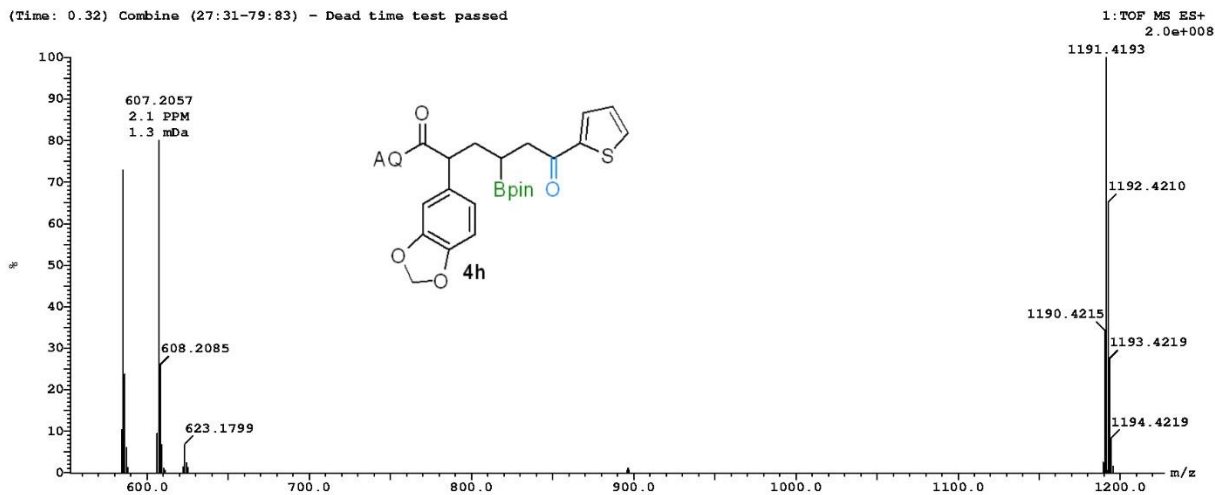

210307.355.10.fid — Fupeng Wu, Q-35 — Au1H CDCl3 {C:\Bruker\TopSpin3.6.2} 2103 55 — 300.13MHz

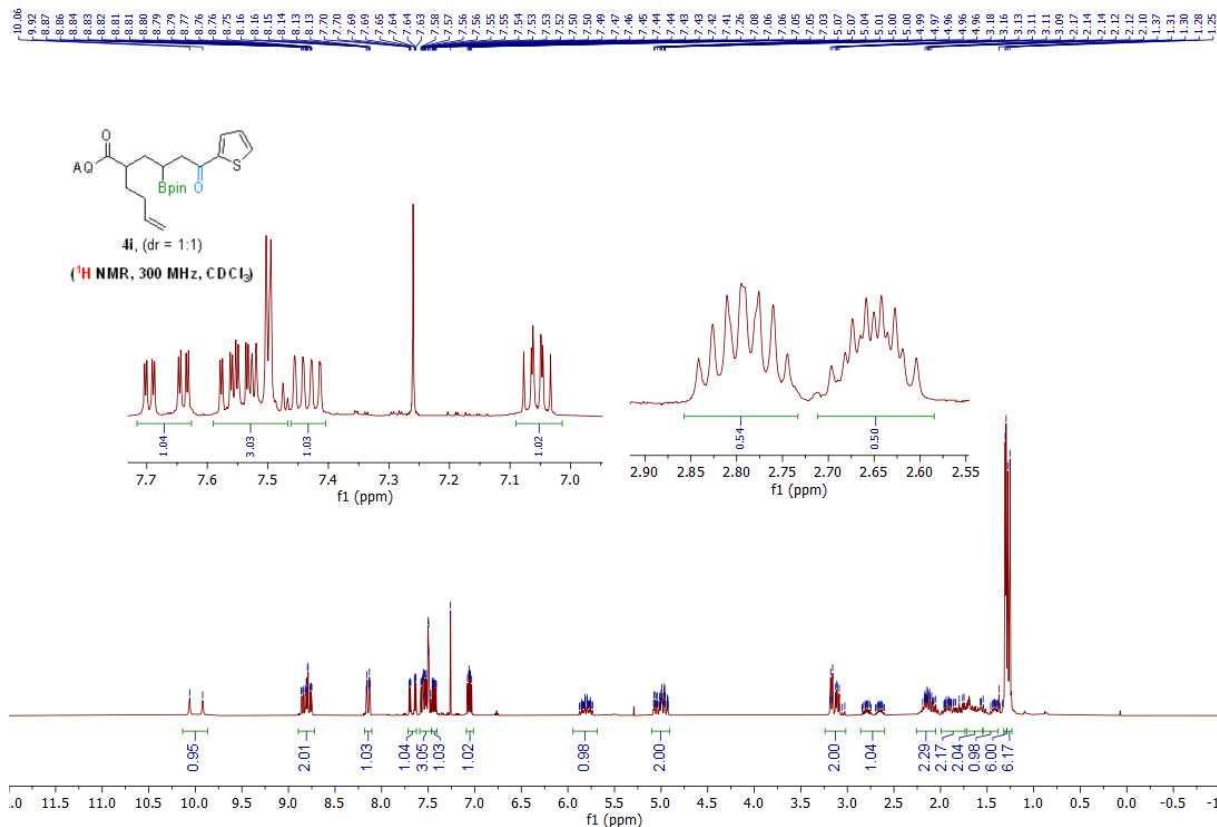

210310.f302.10.fid — Fupeng Wu Q-35 — Cl3CPD CDCl3 {C:\Bruker\TopSpin3.6.2} 2103 2 — 75.49MHz

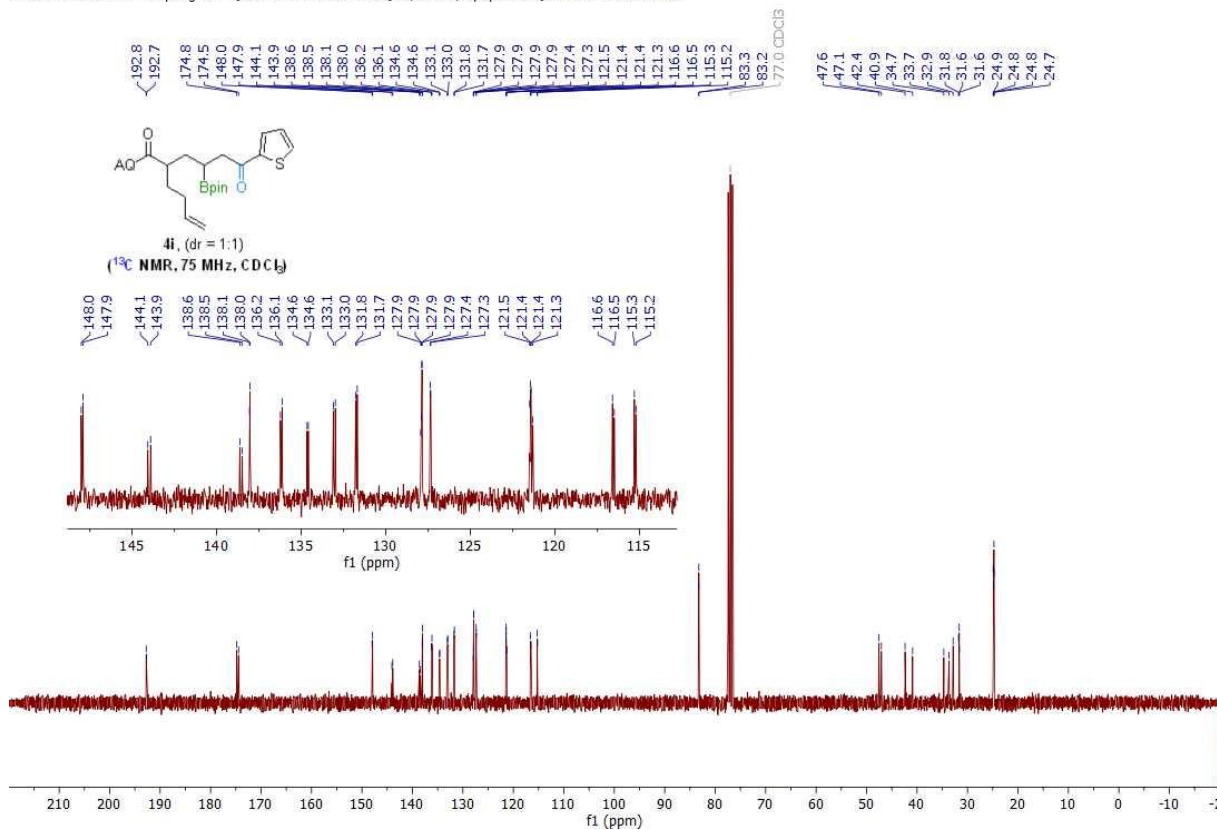



— 32.9

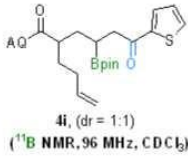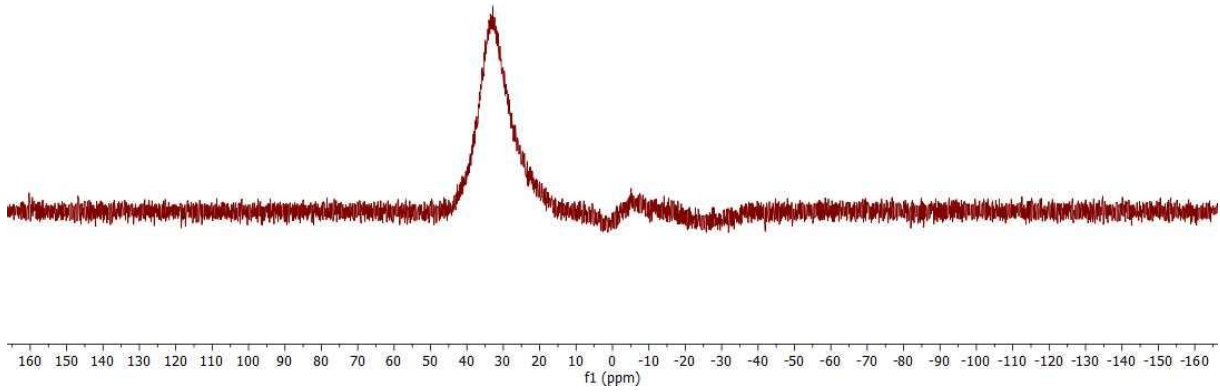

ESI-TOF Accurate Mass Report

File:21032232  
Vial:1.D.8  
Description:MeOH/0.1% HCOOH in H2O 98:2

Sample Name:Q-35  
Date:22-Mar-2021

UserName:Fu-peng Wu  
Time:16.03:38

Page 2

Sample Report:

(Time: 0.34) Combine ((28+30:33)-81:85) — Dead time test passed

1: TOF MS ES+  
3.7e+008

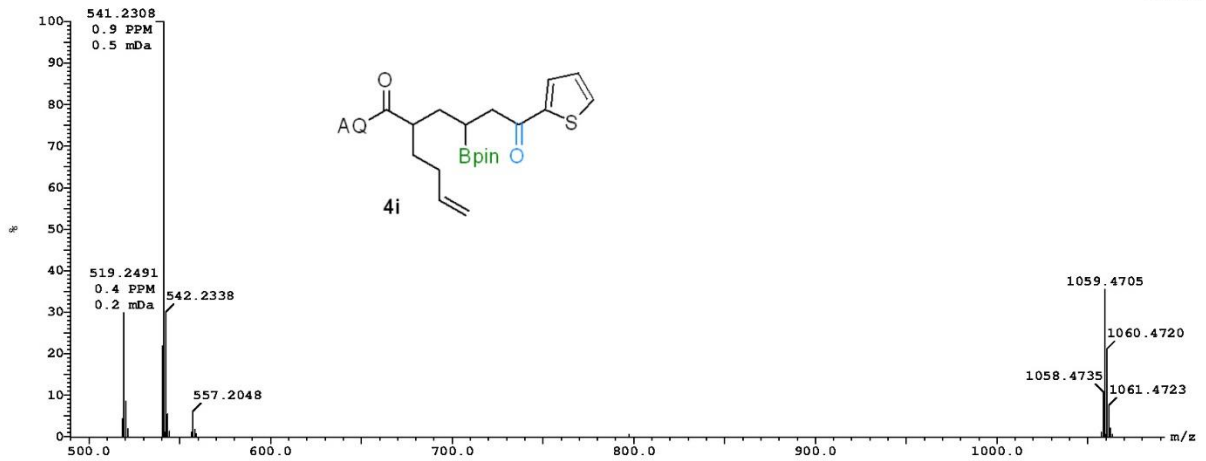

210319.306.21.fid — Fupeng Wu, Q-47 — Au1H CDCl3 {C:\Bruker\TopSpin3.6.2} 2103 6 — 300.13MHz

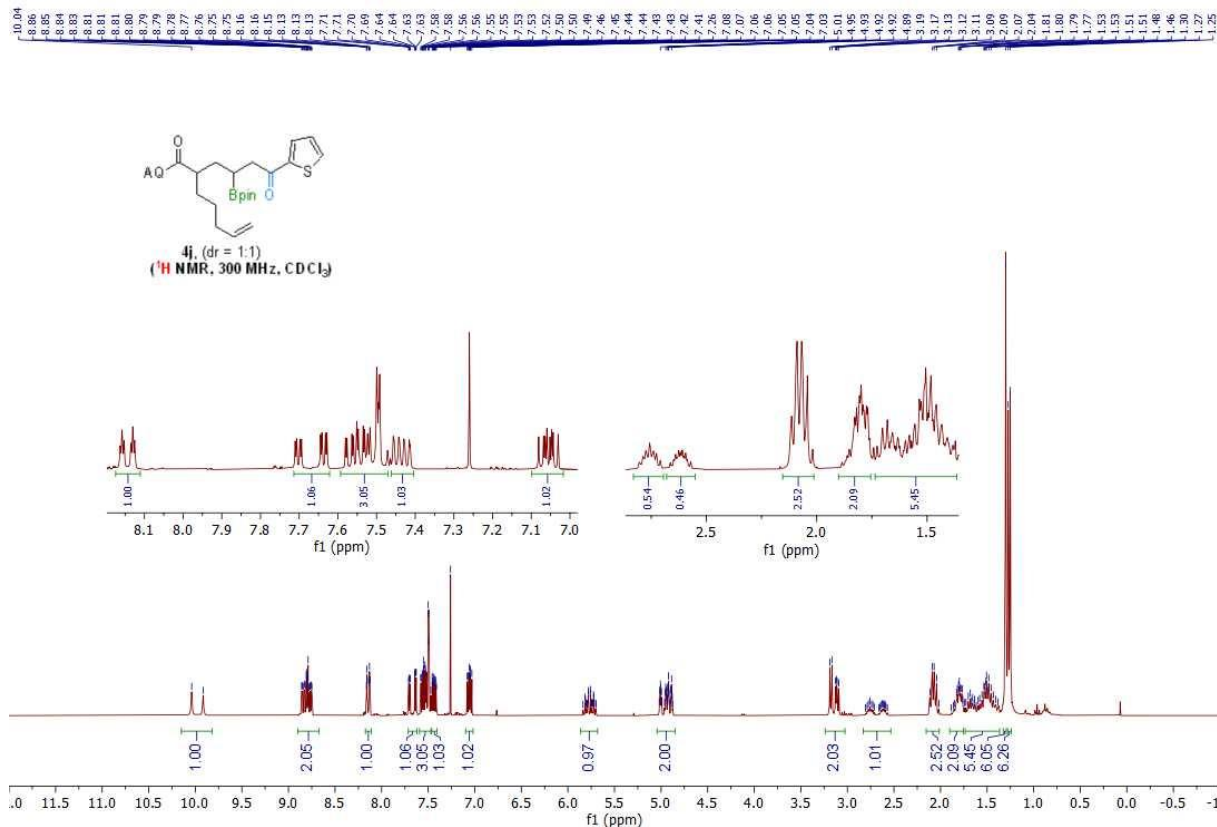

210319.306.20.fid — Fupeng Wu, Q-47 — Au13C CDCl3 {C:\Bruker\TopSpin3.6.2} 2103 6 — 75.48MHz

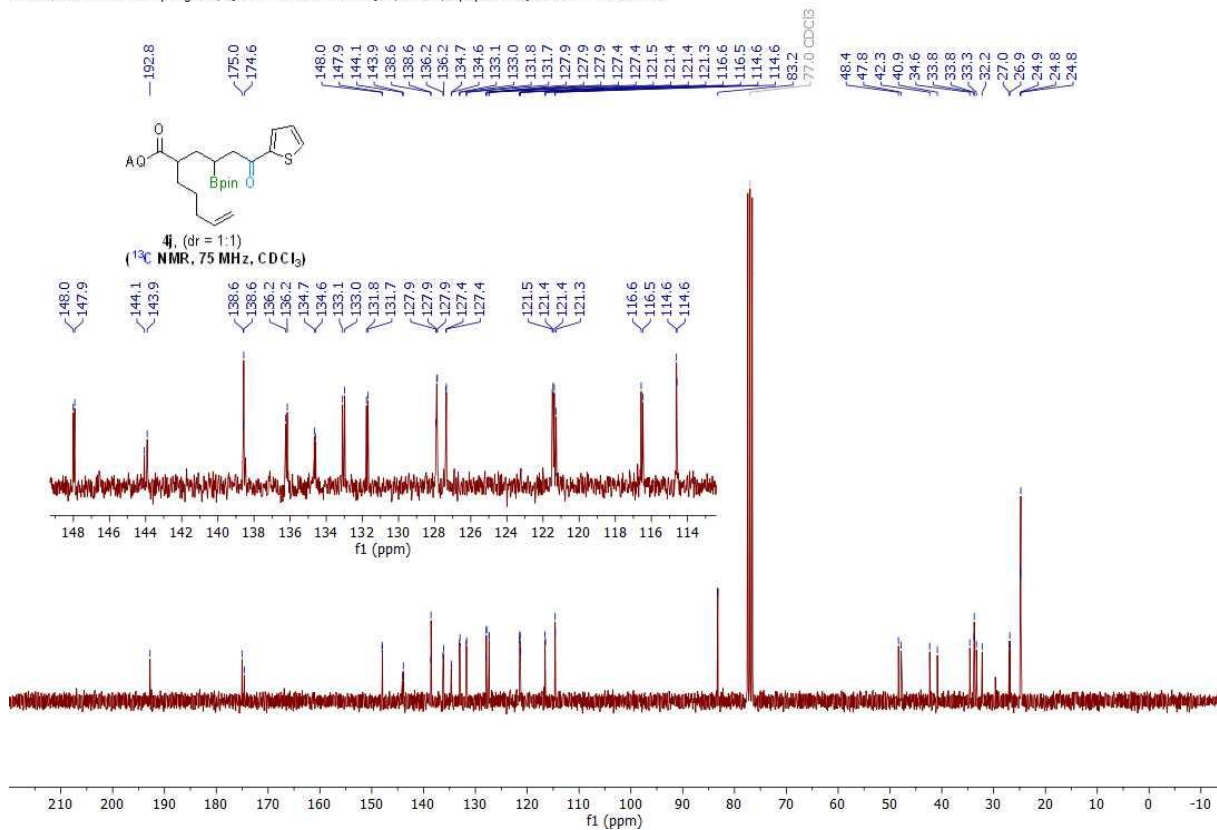

ESI-TOF Accurate Mass Report

File:21040908  
Vial:1.F.3  
Description:MeOH/0.1% HCOOH in H2O 90:10

Sample Name:Q-47  
Date:09-Apr-2021

UserName:Fupeng Wu  
Time:15:18:37

Sample Report:

(Time: 0.52) Combine ((44+47:50)-98:101) - Dead time test passed

1:TOF MS ES+  
7.9e+008

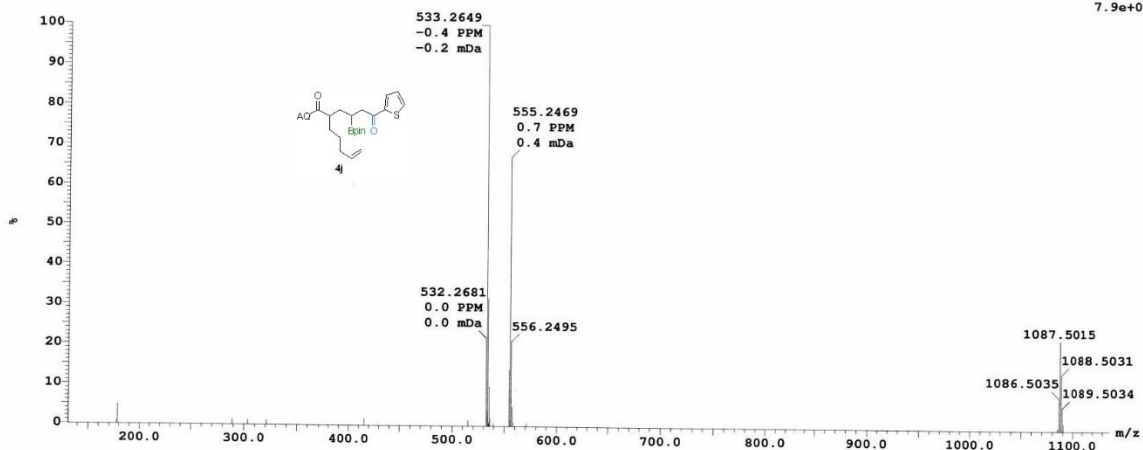

210307.359.10.fid — Fupeng Wu, Q-40 — Au1H CDCl3 {C:\Bruker\TopSpin3.6.2} 2103 59 — 300.13MHz

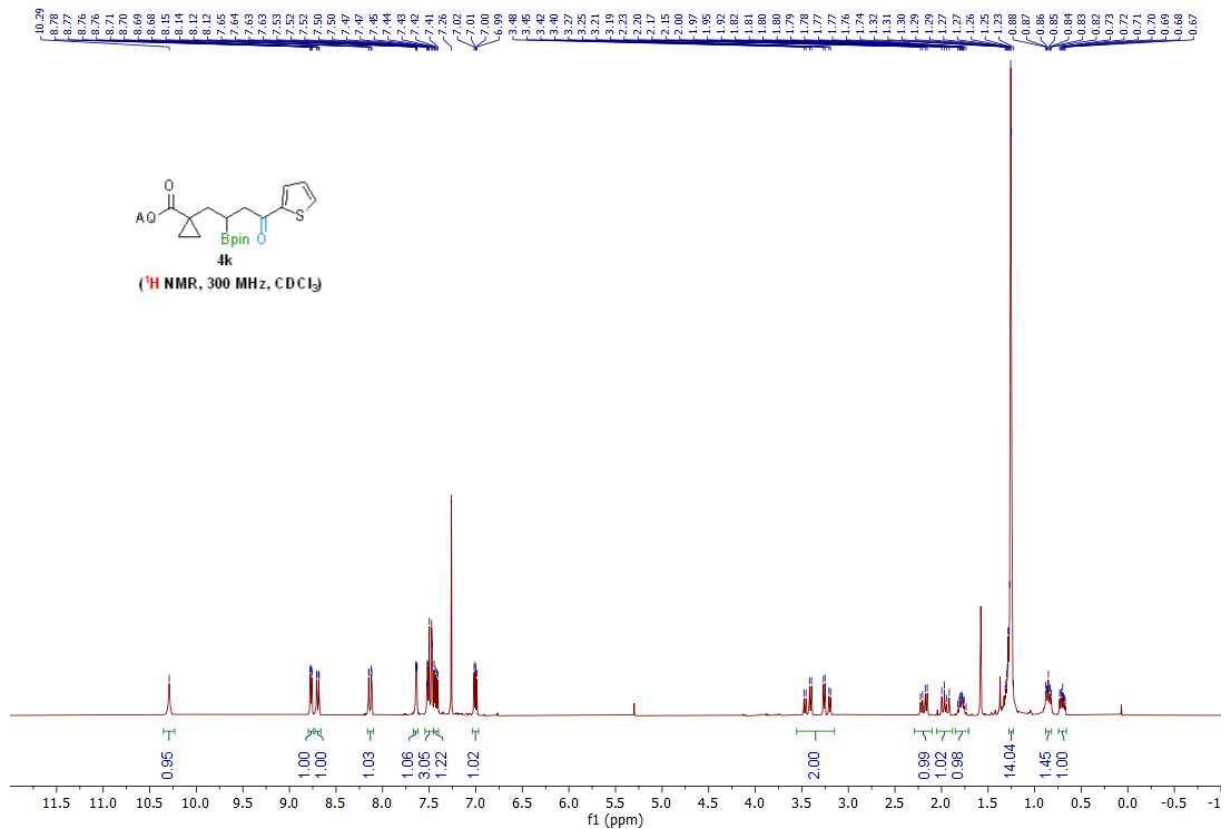

210310.f306.10.fid — Fupeng Wu, Q-40 — C13CPD CDCl3 {C:\Bruker\TopSpin3.6.2} 2103 6 — 75.49MHz

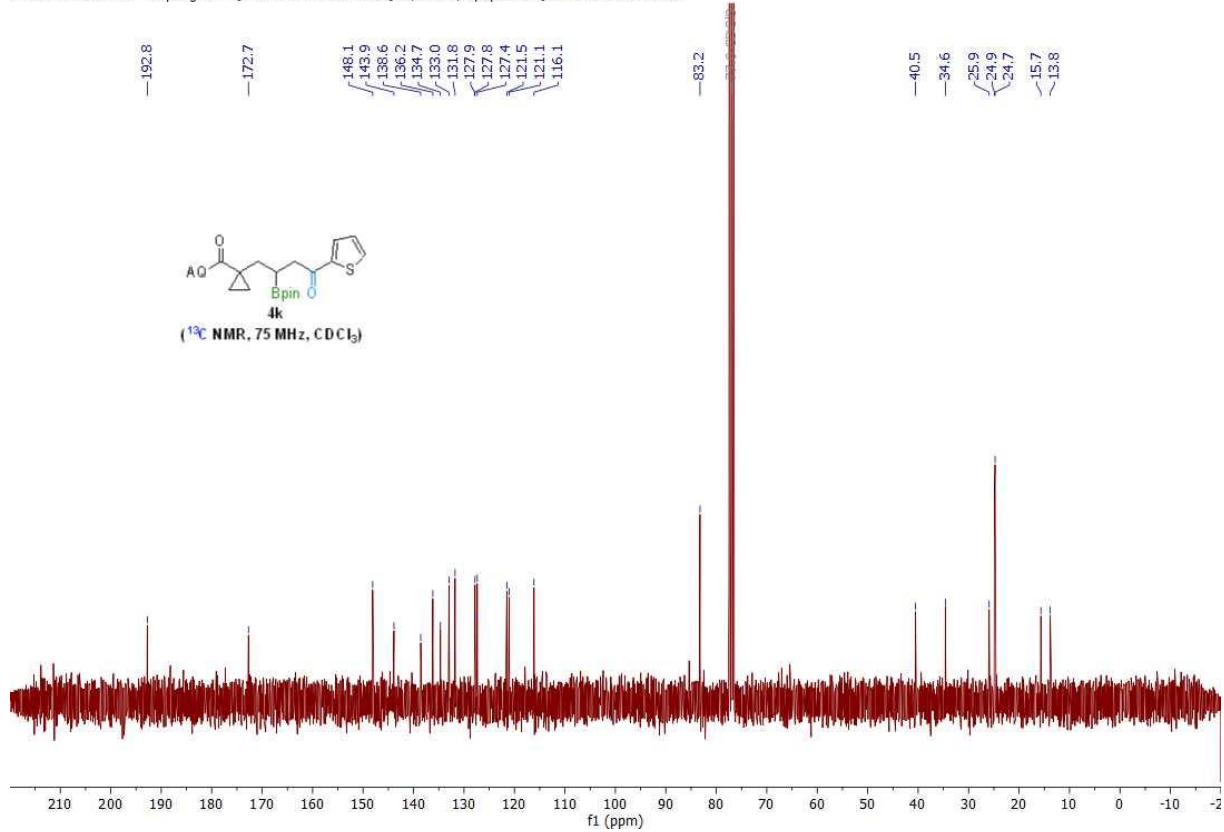

Sample Report:

(Time: 0.33) Combine (28:32-80:84) - Dead time test passed

1: TOF MS ES+  
2.9e+08

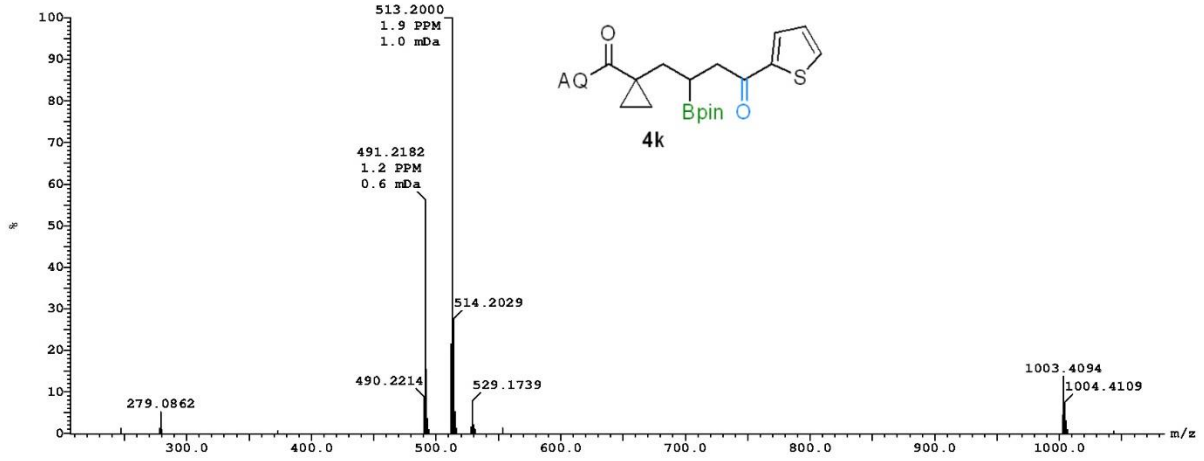

210315.418.10.fid — Fupeng Wu Q-44 — Au1H CDCl3 {C:\Bruker\TopSpin3.5pl6} 2103 18 — 400.13MHz

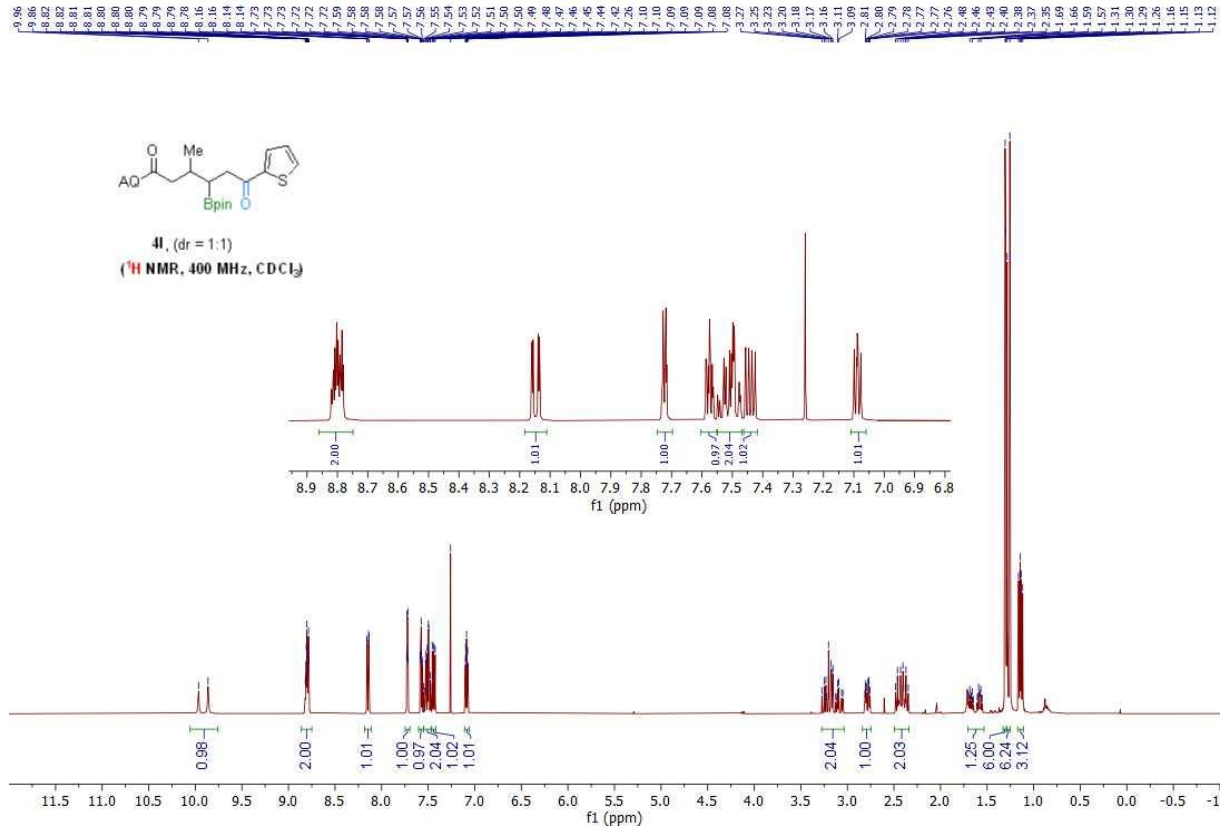

210315.418.11.fid — Fupeng Wu Q-44 — Au13C CDCl3 {C:\Bruker\TopSpin3.5pl6} 2103 18 — 100.63MHz

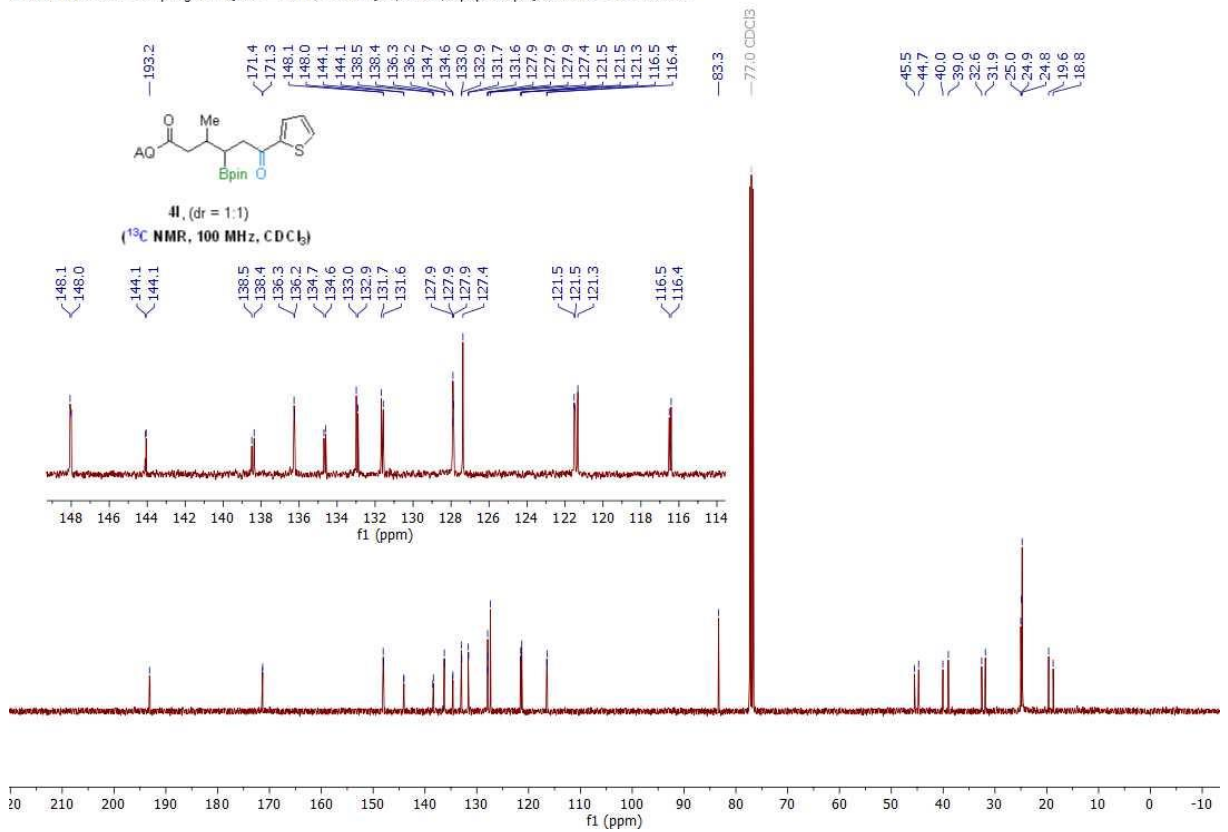

Sample Report:

(Time: 0.33) Combine (29:33-80:84) - Dead time test passed

1: TOF MS ES+  
3.5e+08

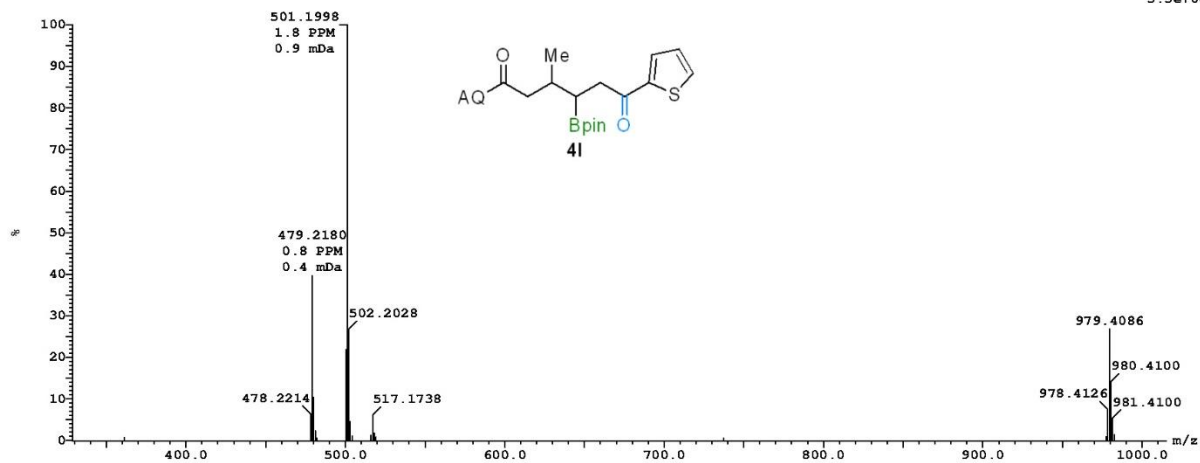

210618.442.10.fid — Fupeng Wu Q-43-3 — Au1H CDCl3 {C:\Bruker\TopSpin3.5pl6} 2106 42 — 400.13MHz

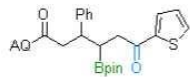

**4m**, (dr > 20:1)  
<sup>1</sup>H NMR, 300 MHz, CDCl<sub>3</sub>

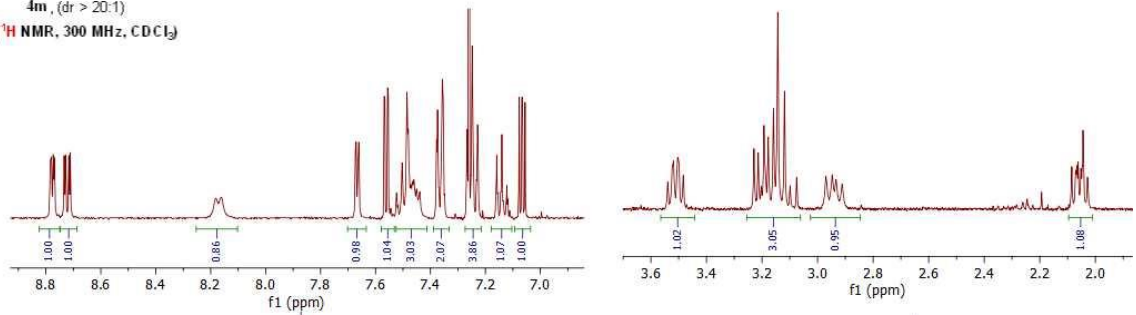

210312.f377.10.fid — Fupeng Wu Q-43 — Cl13CPD CDCl3 {C:\Bruker\TopSpin3.6.2} 2103 17 — 75.49MHz

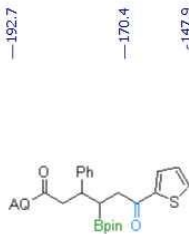

**4m**, (dr > 20:1)  
<sup>13</sup>C NMR, 75 MHz, CDCl<sub>3</sub>

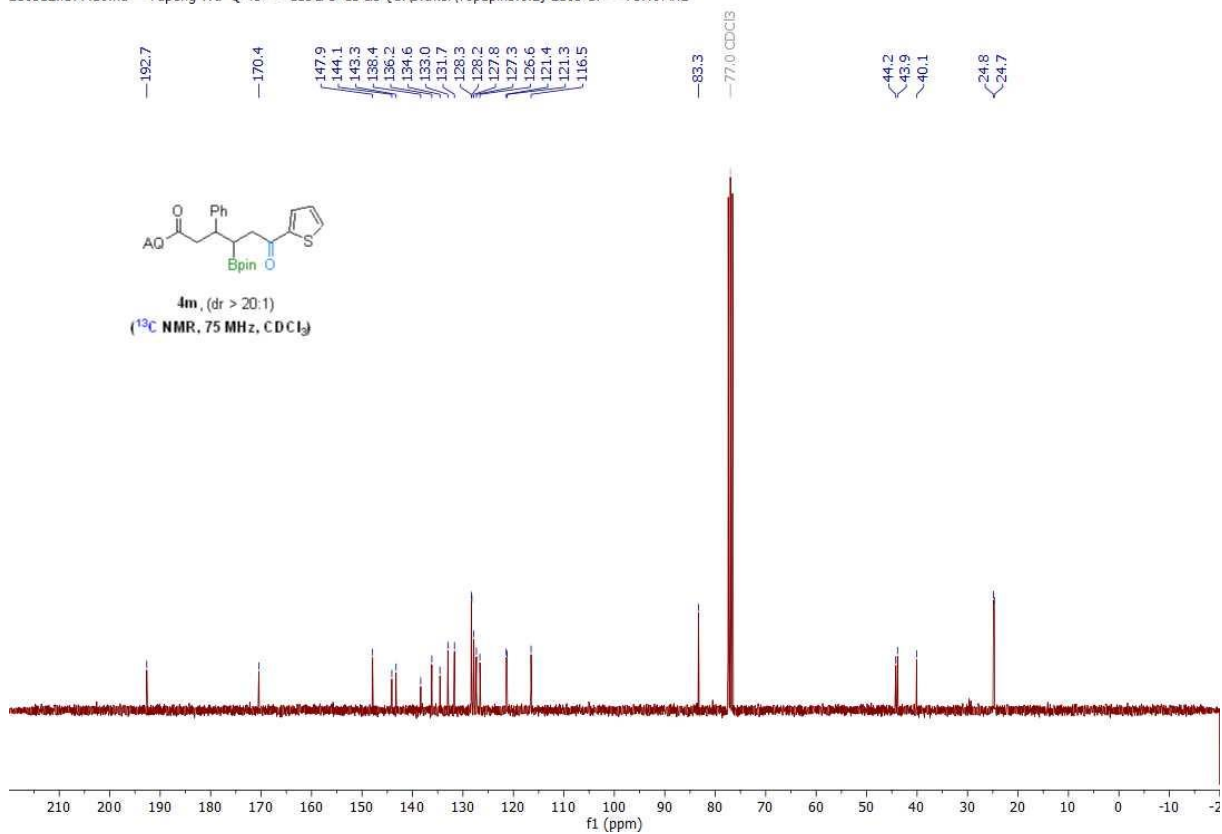



Sample Report:

(Time: 0.33) Combine (27:31-80:84) - Dead time test passed

1: TOF MS ES+  
2.0e+08

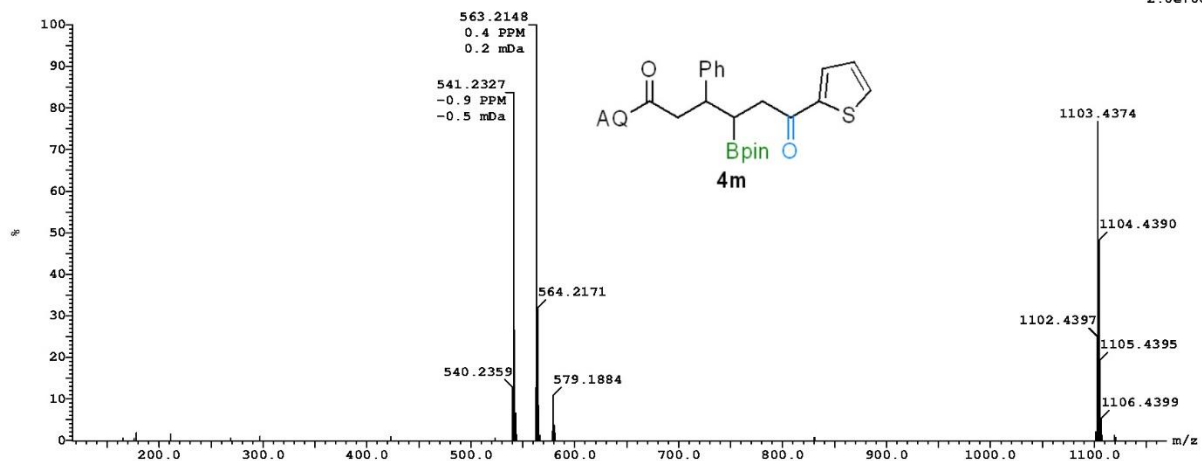



Sample Report:

(Time: 1.16) Combine (105:109-(53:57+158:161)) - Dead time test passed

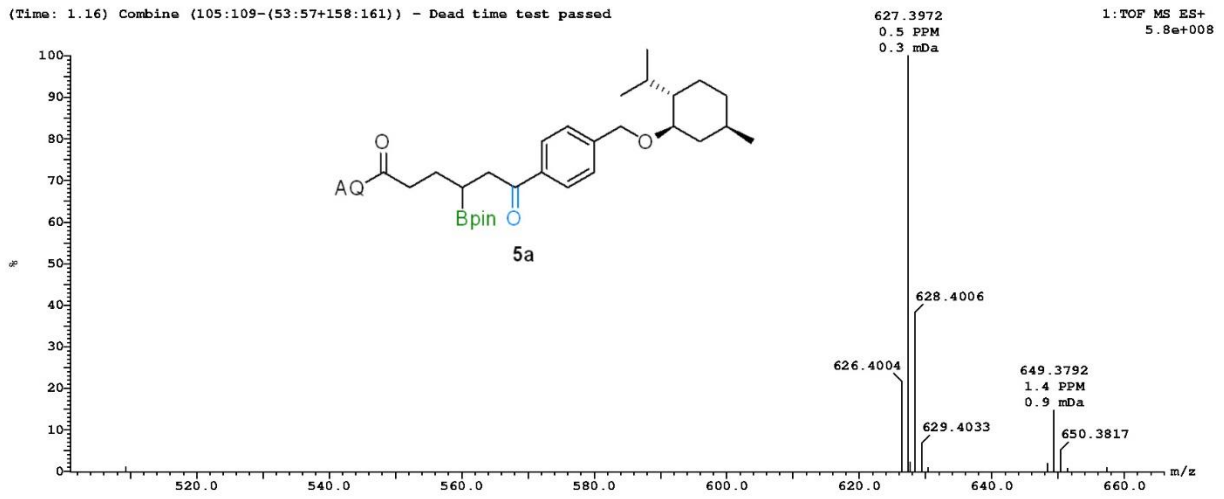

210315.416.10.fid — Fupeng Wu Q-23 — Au1H CDCl3 {C:\Bruker\TopSpin3.5pl6} 2103 16 — 400.13MHz

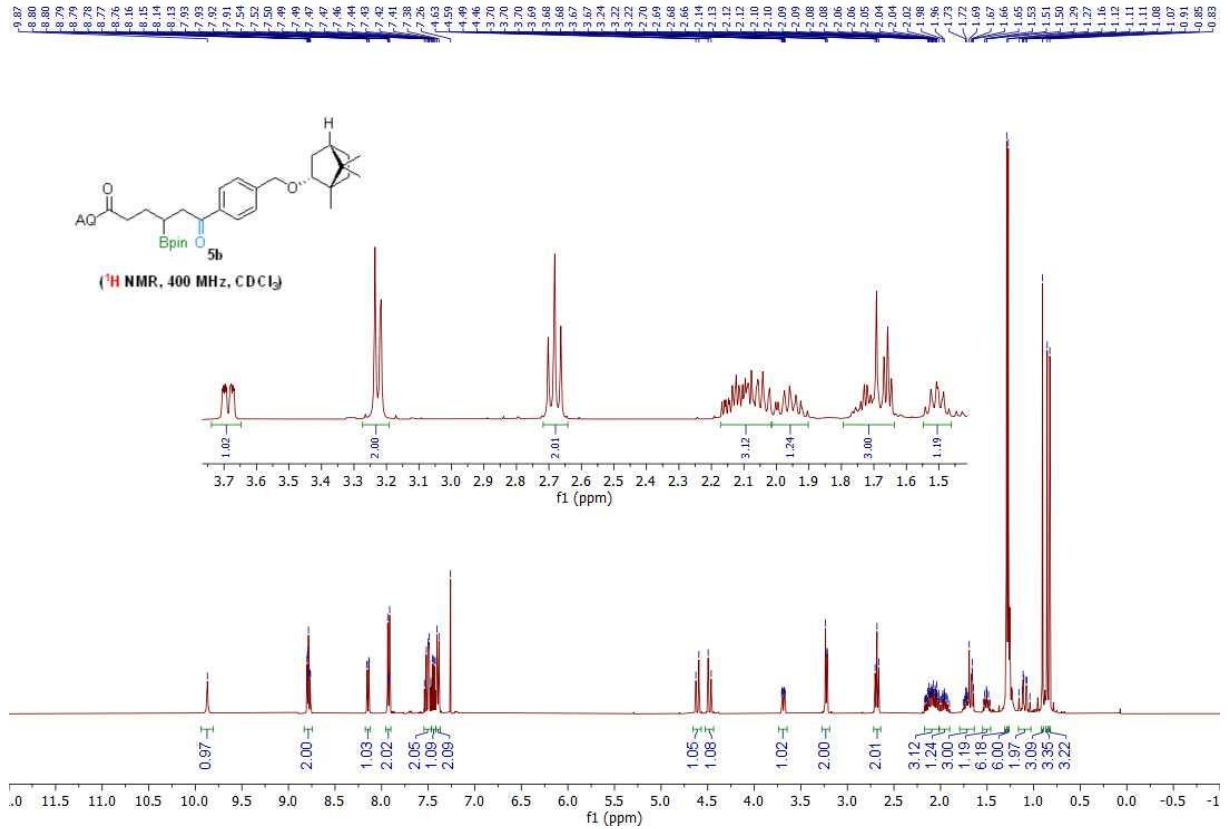

210315.416.11.fid — Fupeng Wu Q-23 — Au13C CDCl3 {C:\Bruker\TopSpin3.5pl6} 2103 16 — 100.63MHz

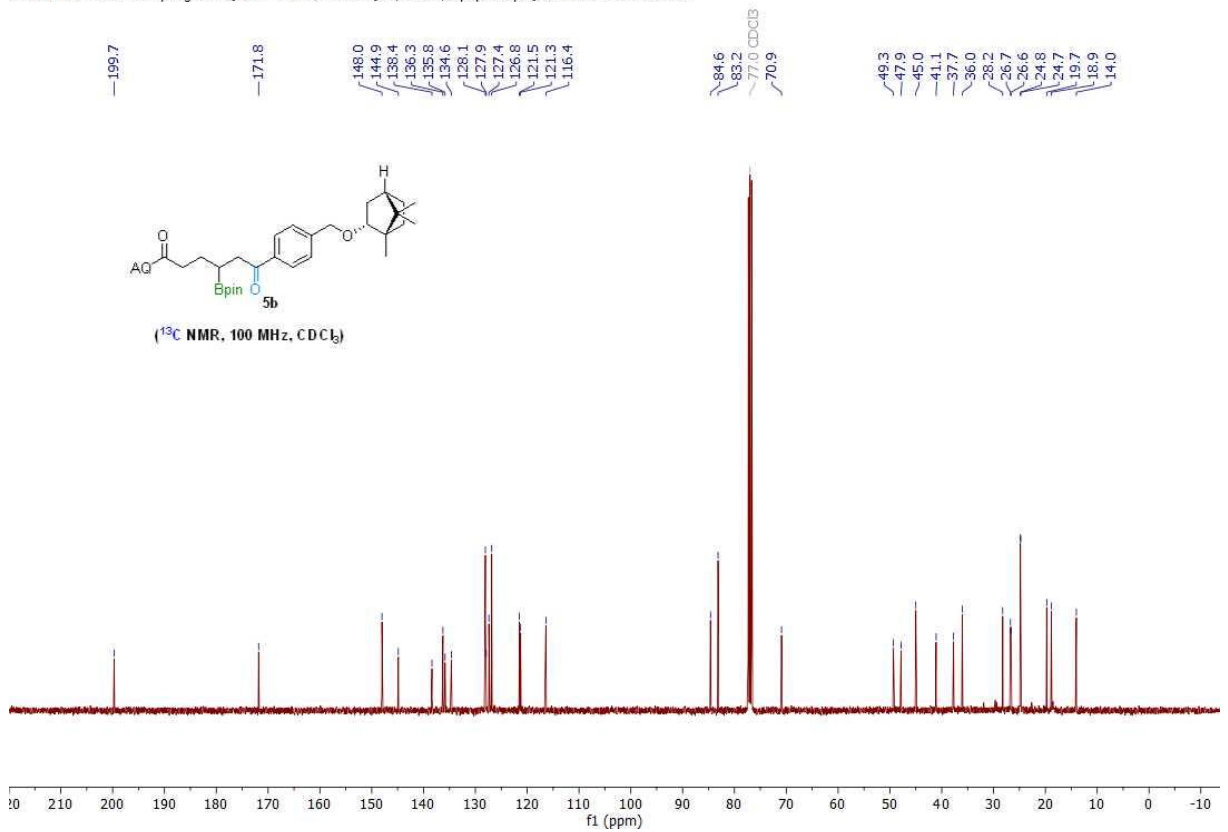

Sample Report:

(Time: 1.13) Combine (102:106-(50:54+155:159)) - Dead time test passed

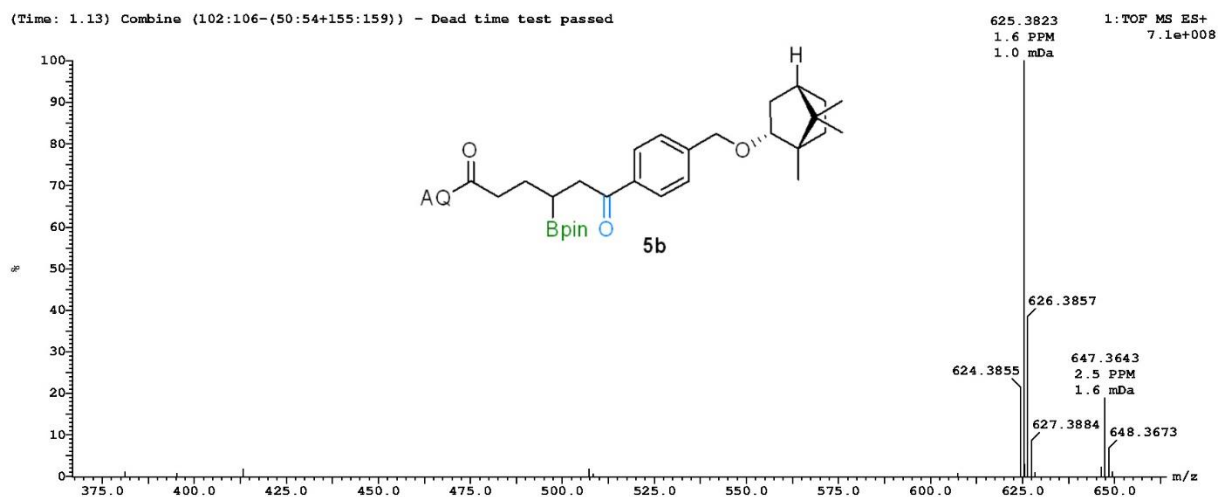

210315.417.10.fid — Fupeng Wu Q-30 — Au1H CDCl3 {C:\Bruker\TopSpin3.5pl6} 2103 17 — 400.13MHz

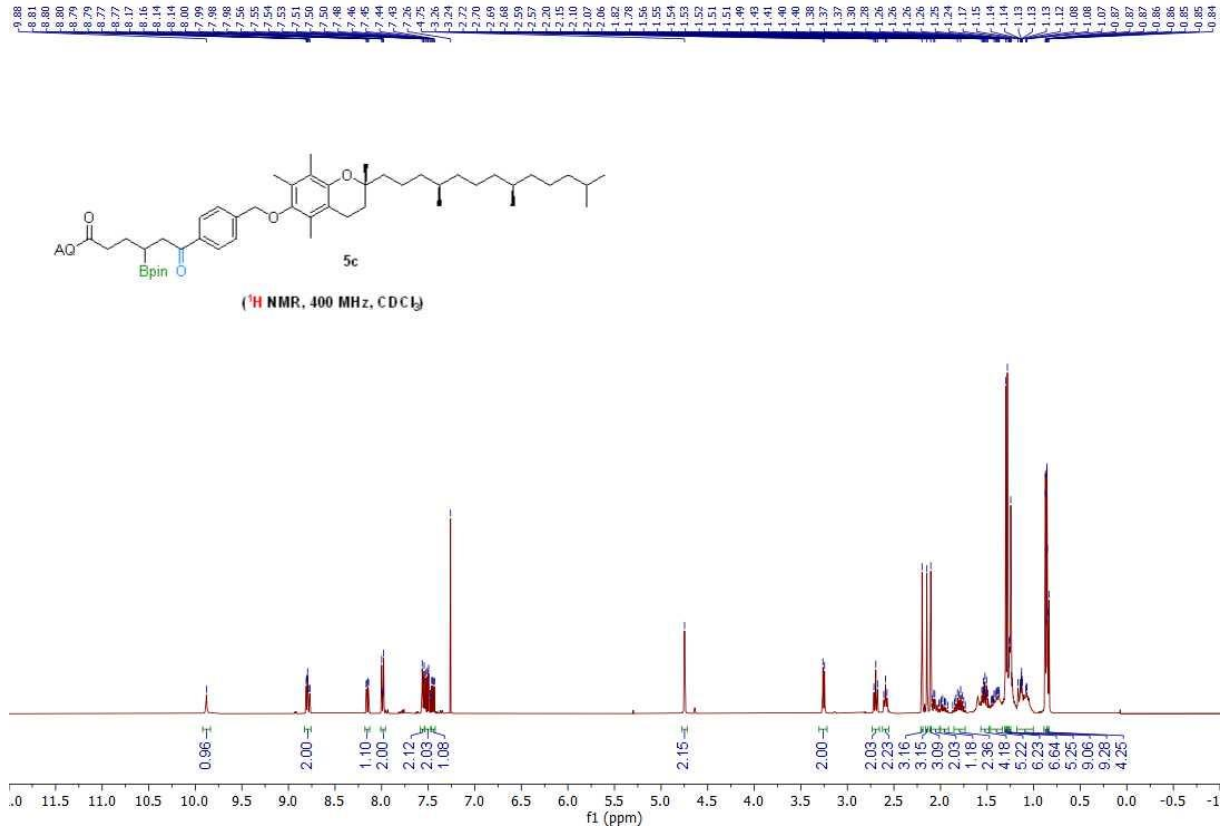

210315.417.11.fid — Fupeng Wu Q-30 — Au13C CDCl3 {C:\Bruker\TopSpin3.5pl6} 2103 17 — 100.63MHz

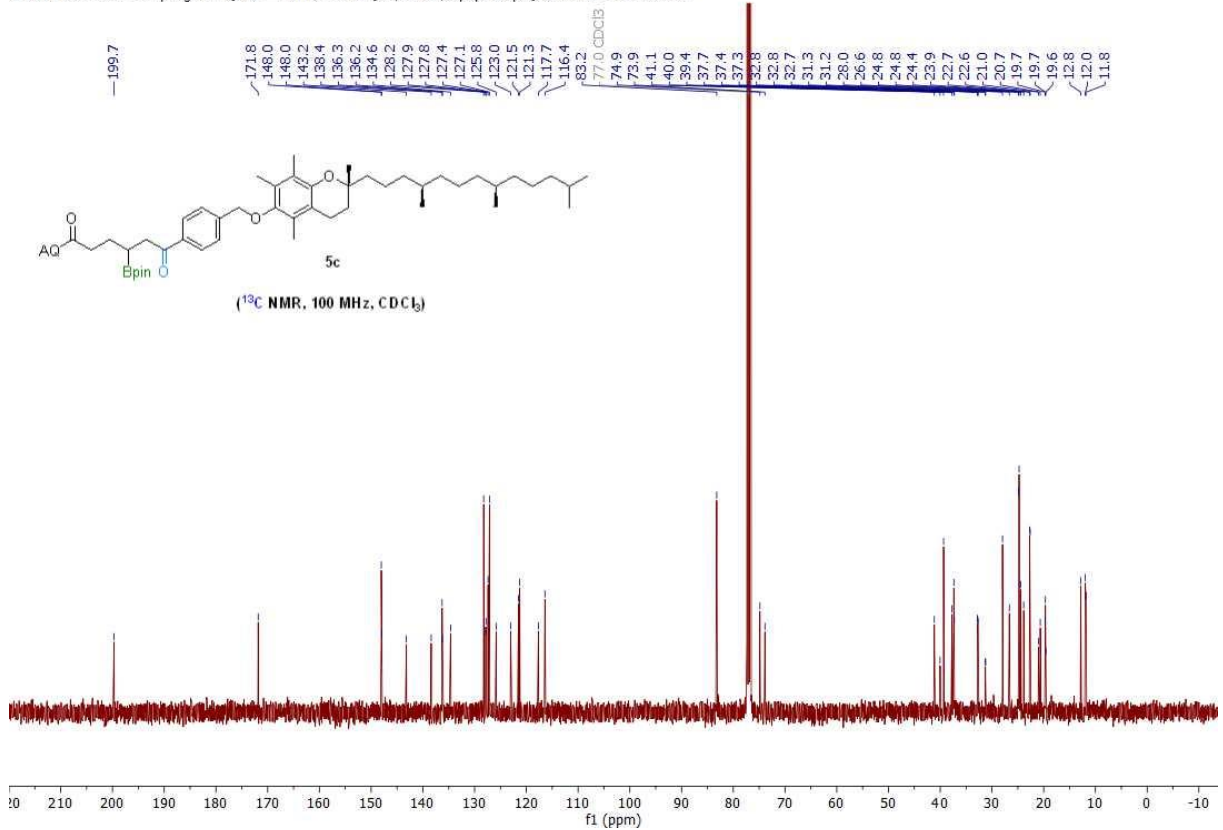

Sample Report:

(Time: 1.20) Combine (109:113-(57:61+162:165)) - Dead time test passed

901.6267  
0.1 PPM  
0.1 mDa

1:TOF MS ES+  
5.5e+007

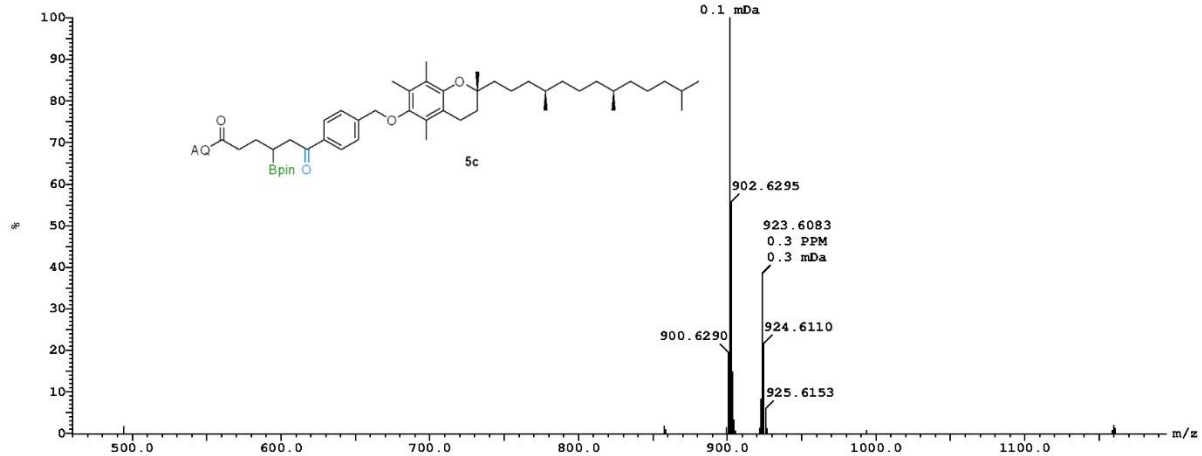

210316.f314.10.fid — Fupeng Wu Q-22-6 — PROTON CDCl3 {C:\Bruker\TopSpin3.6.2} 2103 14 — 300.20MHz

9.87 8.80 8.79 8.78 8.76 8.16 8.14 8.13 7.93 7.91 7.55 7.52 7.50 7.49 7.48 7.46 7.43 7.42 7.41 7.38 7.36 7.26 4.74 4.70 4.65 4.62 4.61 4.60 4.59 4.44 4.43 4.25 4.24 4.23 4.22 4.21 4.21 3.94 3.90 3.86 3.76 3.75 3.71 3.71 3.67 3.63 3.63 3.59 3.52 3.21 3.21 2.71 2.68 2.65 2.06 1.98 1.86 1.86 1.83 1.83 1.91 1.91 1.55 1.55 1.52 1.52 1.50 1.50 1.50 1.48 1.48 1.42 1.42 1.33 1.33 1.29 1.27

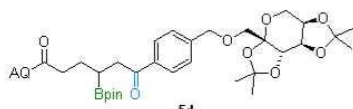

(<sup>1</sup>H NMR, 300 MHz, CDCl<sub>3</sub>)

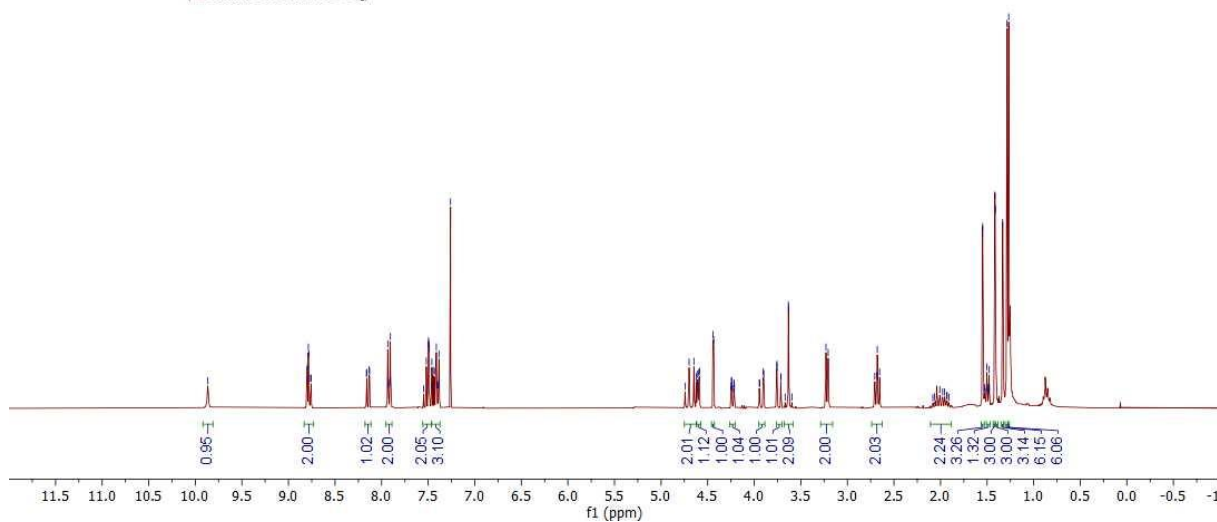

210315.415.11.fid — Fupeng Wu Q-22-5 — Au13C CDCl3 {C:\Bruker\TopSpin3.5pl6} 2103 15 — 100.63MHz

199.6 171.8 148.0 143.3 138.4 136.3 136.1 134.6 128.1 127.9 127.4 127.1 121.5 121.3 116.4 108.9 108.6 102.6 83.2 77.0 CDCl3 73.1 71.8 71.0 70.1 70.1 61.0 41.1 37.7 26.6 26.5 25.8 25.4 24.8 24.7 24.0

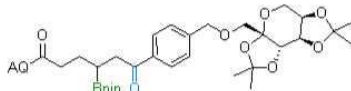

(<sup>13</sup>C NMR, 100 MHz, CDCl<sub>3</sub>)

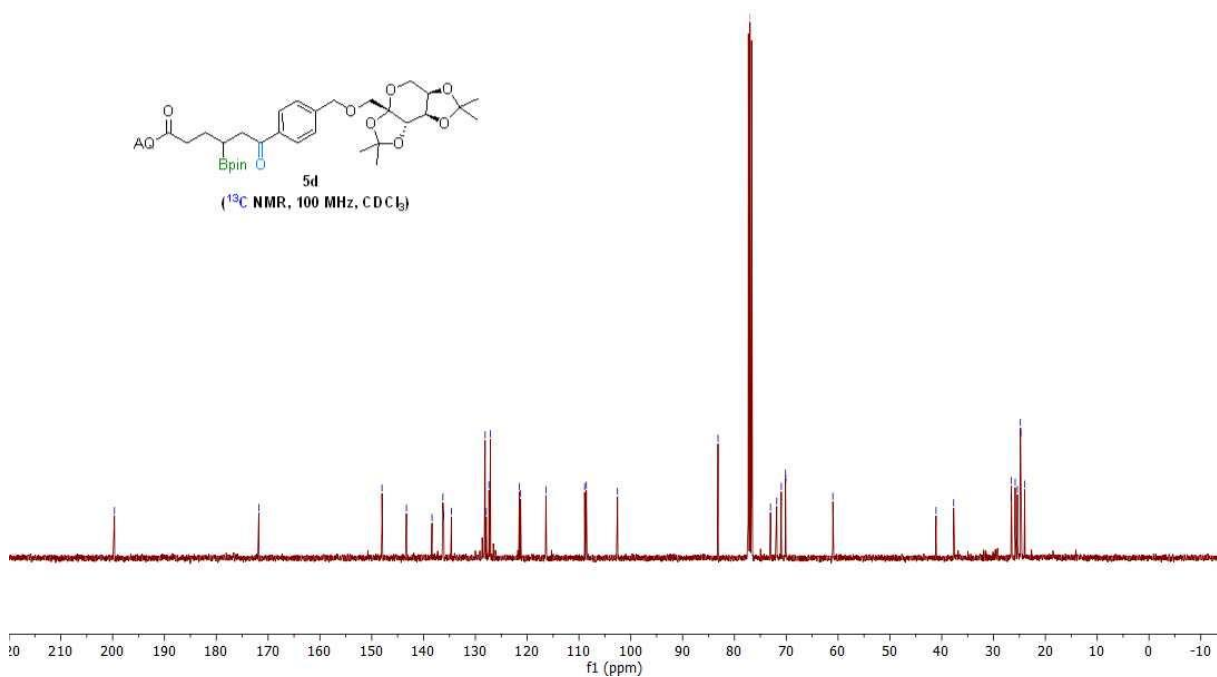



Sample Report:

(Time: 0.51) Combine (43:47-97:100) - Dead time test passed

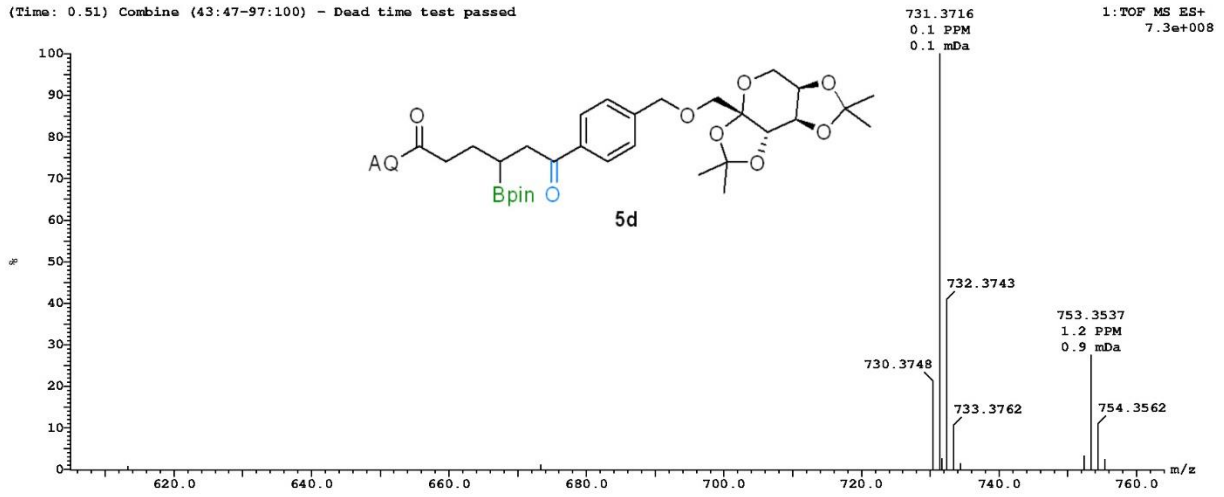

210315.414.10.fid — Fupeng Wu Q-19 — Au1H CDCl3 {C:\Bruker\TopSpin3.5pl6} 2103 14 — 400.13MHz

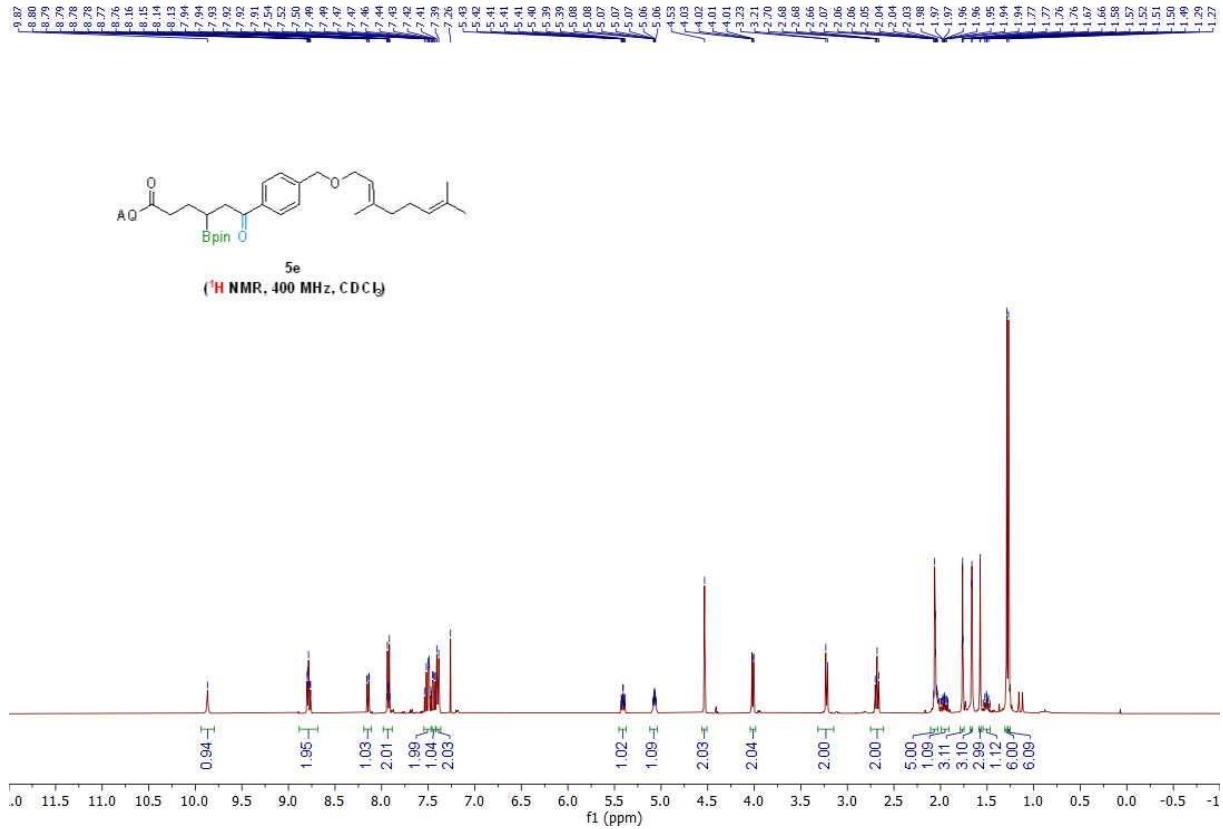

210315.414.11.fid — Fupeng Wu Q-19 — Au13C CDCl3 {C:\Bruker\TopSpin3.5pl6} 2103 14 — 100.63MHz

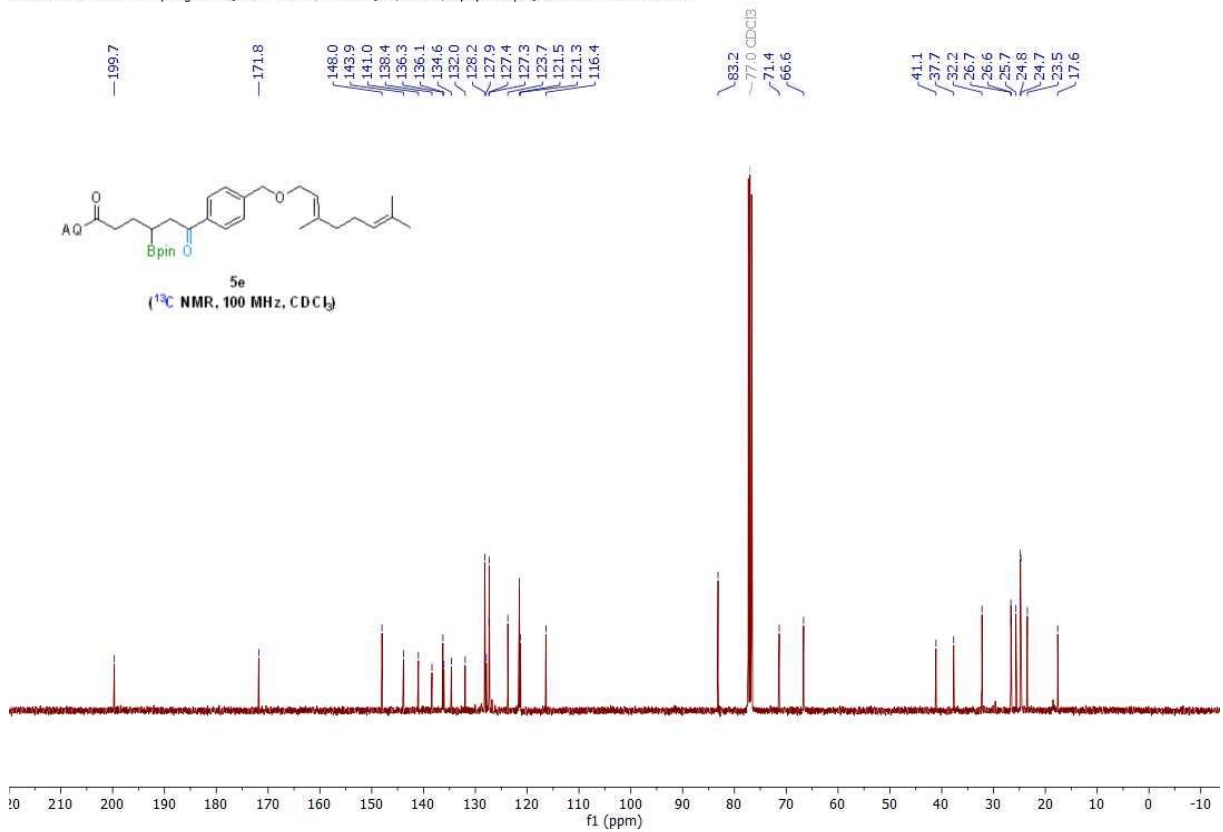

Sample Report:

(Time: 0.37) Combine (32:36-84:88) - Dead time test passed

1:TOF MS ES+  
4.4e+006

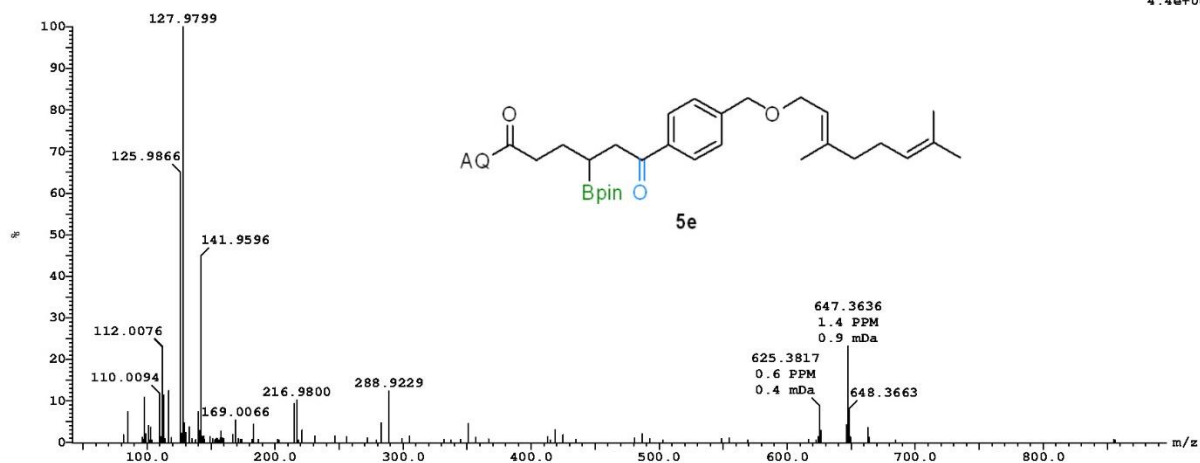

210316.341.10.fid — Fupeng Wu Q-T-1 — Au1H CDCl3 {C:\Bruker\TopSpin3.6.2} 2103 41 — 300.13MHz

9.93 8.82 8.81 8.80 8.79 8.77 8.75 8.74 8.16 8.15 8.14 7.97 7.97 7.96 7.96 7.94 7.94 7.93 7.93 7.60 7.60 7.58 7.58 7.57 7.57 7.55 7.55 7.53 7.53 7.50 7.50 7.49 7.49 7.48 7.48 7.47 7.47 7.46 7.46 7.46 7.46 7.44 7.44 7.44 7.44 7.43 7.43 7.42 7.42 4.40 4.39 4.38 4.38 4.37 4.37 4.36 4.36 4.35 4.35 4.34 4.34 4.33 4.33 3.79 3.79 3.78 3.78 3.28 3.28 3.27 3.27 3.21 3.21 3.19 3.19 3.16 3.16 3.13 3.13 3.10 3.10 2.85 2.85 2.83 2.83 2.82 2.82 2.81 2.81 2.80 2.80 2.14 2.14 2.11 2.11 2.09 2.09 2.08 2.08 2.07 2.07 2.06 2.06 2.05 2.05 2.04 2.04 2.02 2.02 2.00 2.00 1.99 1.99

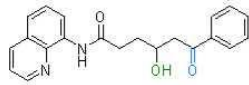

(<sup>1</sup>H NMR, 300 MHz, CDCl<sub>3</sub>)

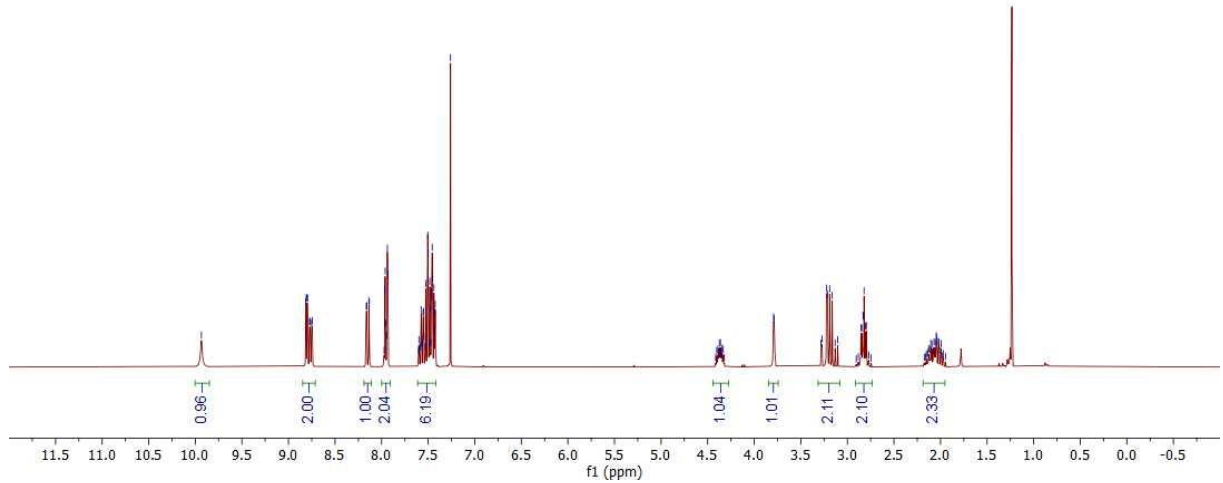

210316.341.11.fid — Fupeng Wu Q-T-1 — Au13C CDCl3 {C:\Bruker\TopSpin3.6.2} 2103 41 — 75.48MHz

200.5 171.7 148.2 138.3 136.6 136.3 134.4 133.5 128.6 128.1 127.9 127.3 121.6 121.5 116.5 77.0 CDCl3 67.1 45.2 34.2 31.8

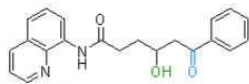

(<sup>13</sup>C NMR, 75 MHz, CDCl<sub>3</sub>)

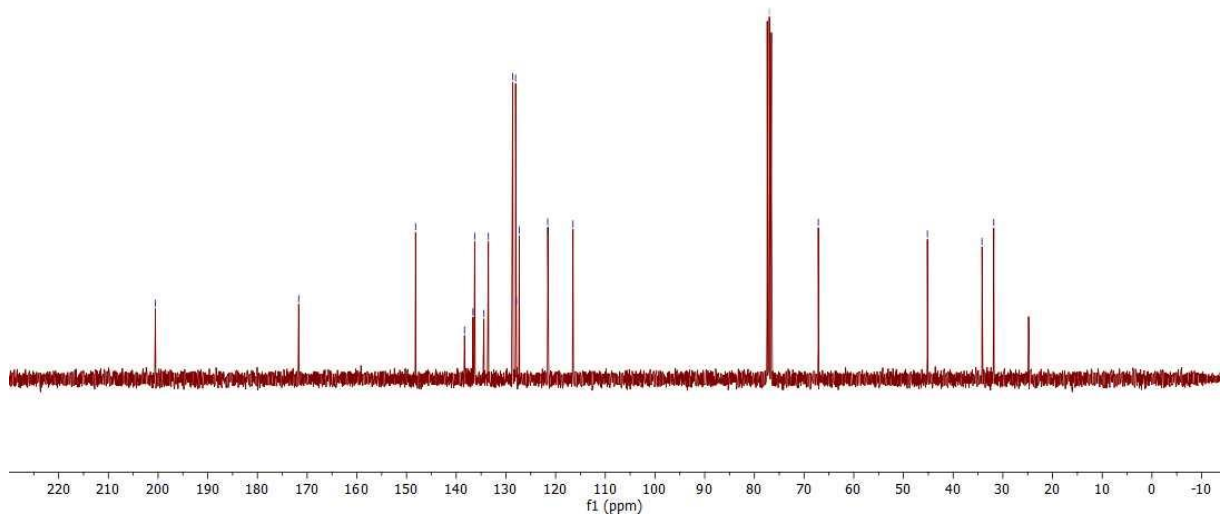

ESI-TOF Accurate Mass Report

File:21040909

Vial:1,F,4

Description:MeOH/0.1% HCOOH in H2O 90:10

Sample Name:Q-T-1

Date:09-Apr-2021

UserName:Fupeng Wu

Time:16:28:32

Page 2

Sample Report:

(Time: 0.33) Combine ((28+30:33)-80:84) - Dead time test passed

1:TOF MS ES+  
3.1e+008

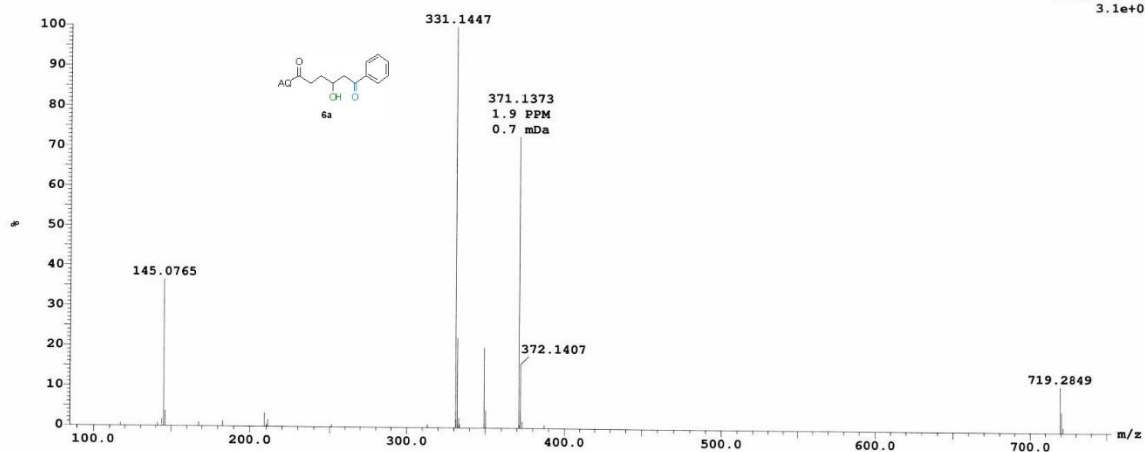

210319.305.21.fid — Fupeng Wu, Q-7-2 — Au1H CDCl3 {C:\Bruker\TopSpin3.6.2} 2103 5 — 300.13MHz

8.92 8.91 8.90 8.87 8.86 8.16 8.14 8.13 8.13 7.80 7.80 7.78 7.78 7.69 7.69 7.67 7.66 7.66 7.58 7.55 7.53 7.53 7.51 7.50 7.50 7.49 7.48 7.48 7.40 7.39 7.39 7.36 7.36 7.35 7.35 7.34 7.34 7.33 7.33 7.33 7.32 7.31 7.31 7.30 7.29 7.29 7.29 7.28 7.27 7.27 5.26 5.26 3.18 3.18 3.12 3.12 3.09 3.09 3.09 3.09 2.76 2.76 2.76 2.75 2.75 2.74 2.74 2.74 2.73 2.73 2.71 2.71 2.01 2.01 1.99 1.99 1.98 1.98 1.97 1.96

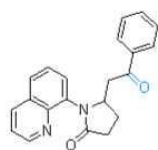

(<sup>1</sup>H NMR, 300 MHz, CDCl<sub>3</sub>)

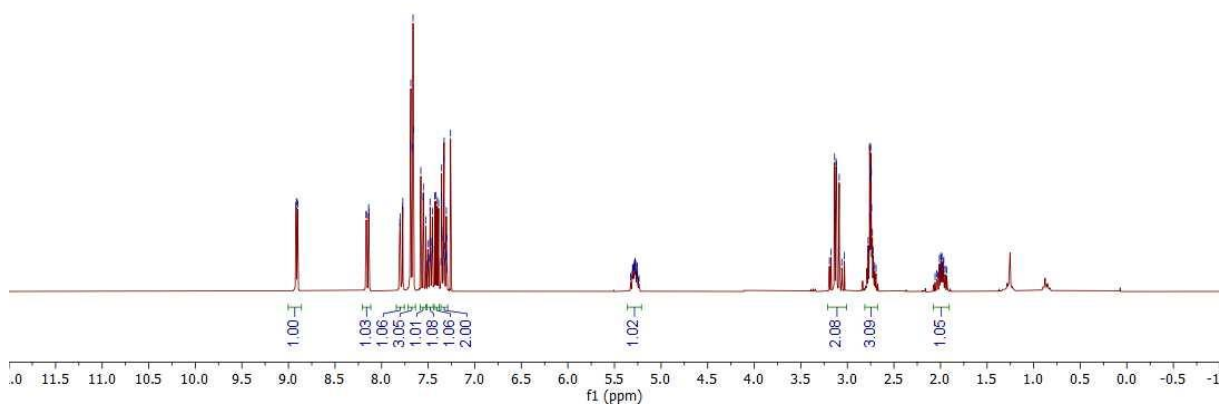

210319.305.20.fid — Fupeng Wu, Q-7-2 — Au13C CDCl3 {C:\Bruker\TopSpin3.6.2} 2103 5 — 75.48MHz

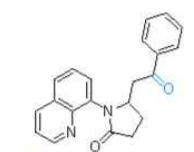

(<sup>13</sup>C NMR, 75 MHz, CDCl<sub>3</sub>)

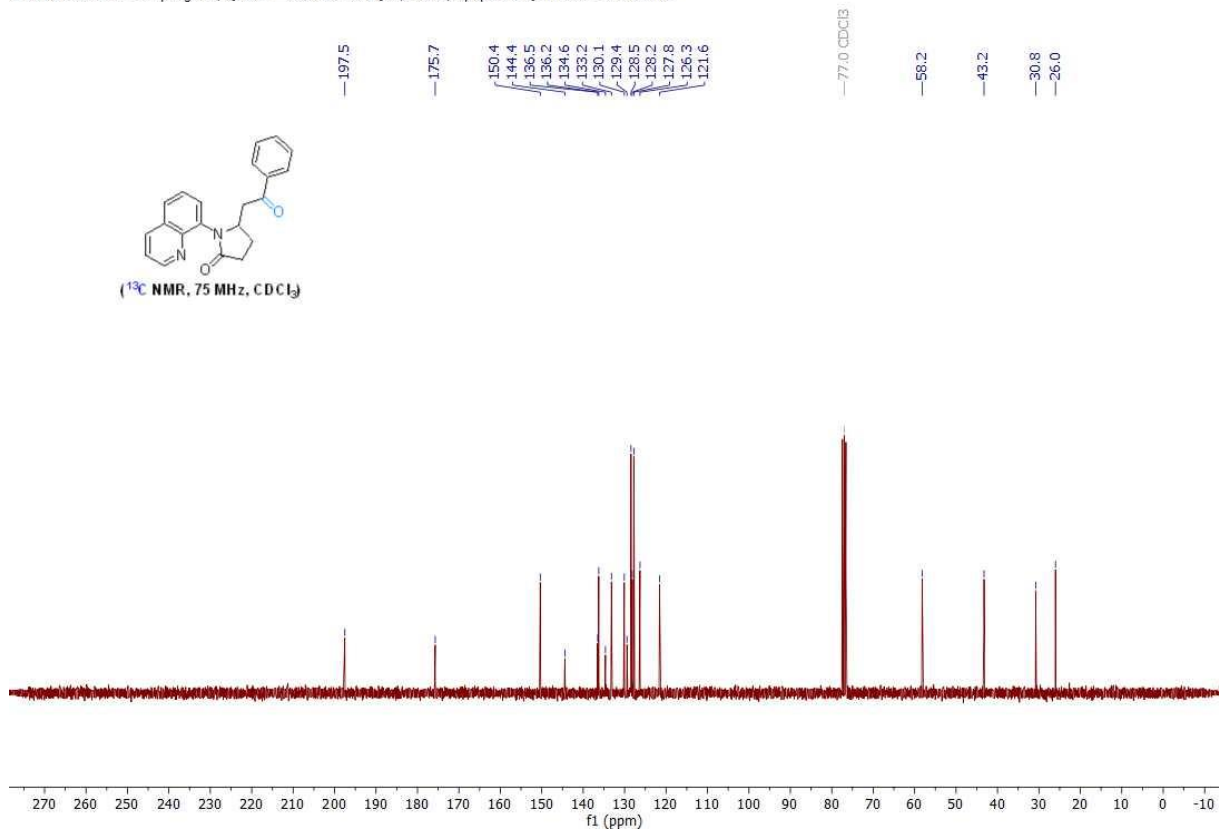

210419.f326.10.fid — Fupeng Wu Q-T-5 — PROTON CDCl3 {C:\Bruker\TopSpin3.6.2} 2104 26 — 300.20MHz

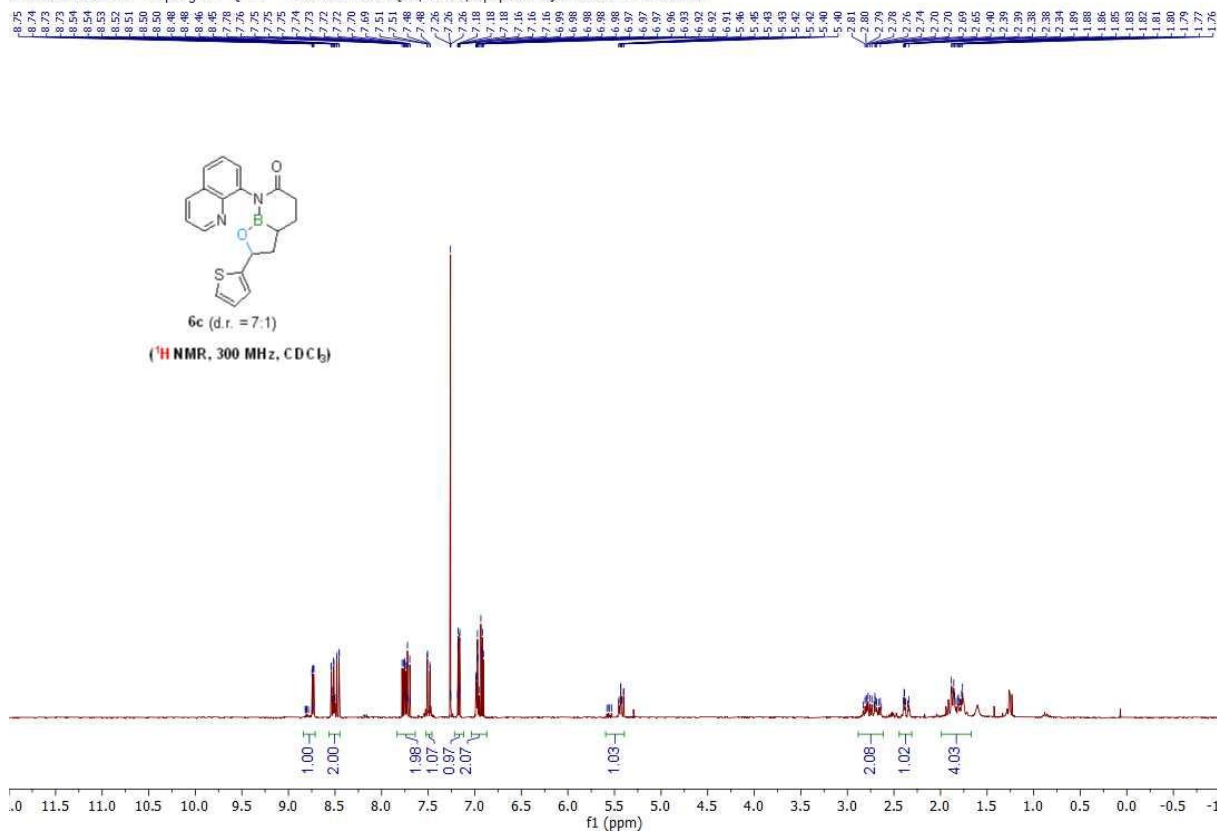

210406.f367.10.fid — Fupeng Wu Q-T-5 — C13CPD CDCl3 {C:\Bruker\TopSpin3.6.2} 2104 7 — 75.49MHz

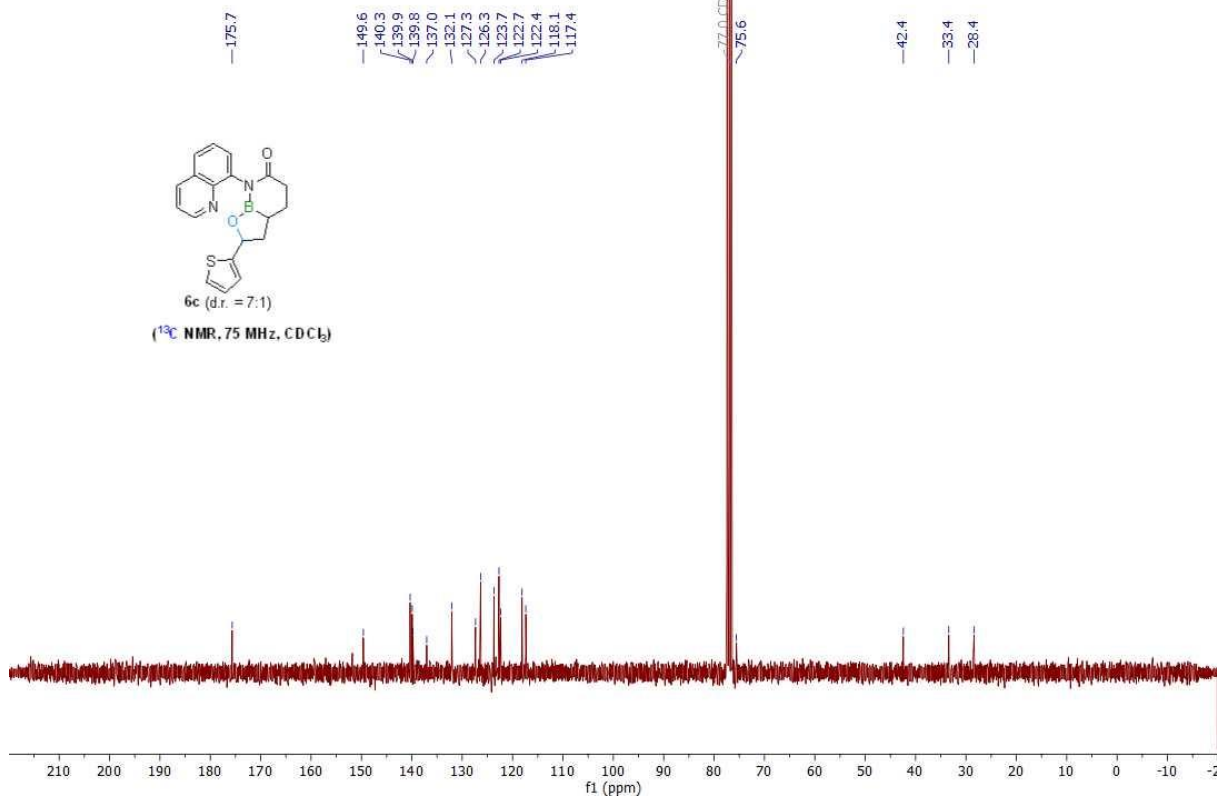

-12.1

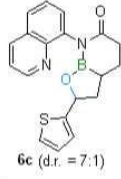

(<sup>13</sup>B NMR, 96 MHz, CDCl<sub>3</sub>)

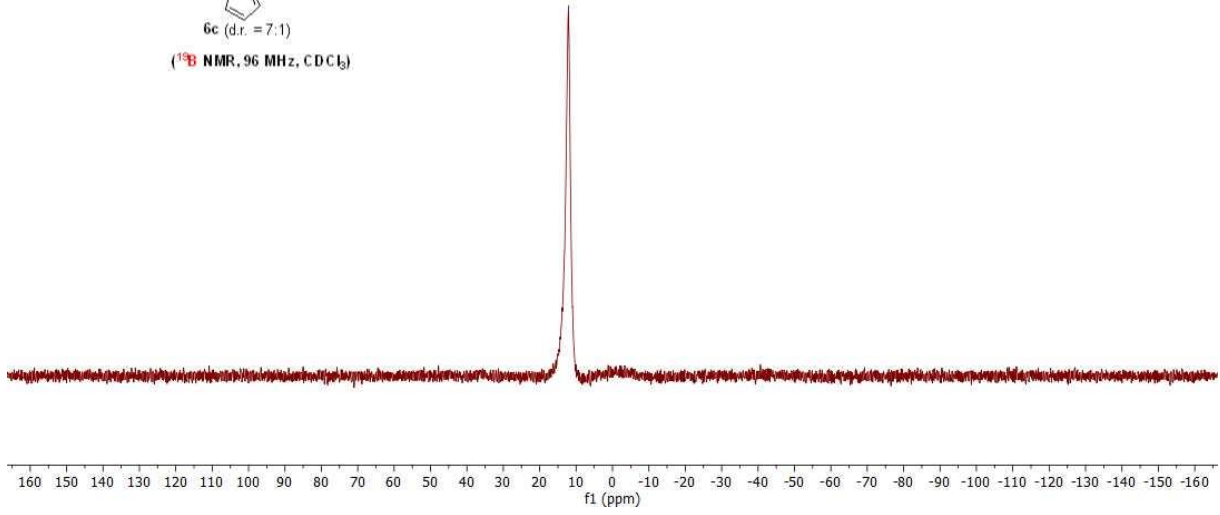

ESI-TOF Accurate Mass Report

File:21040911  
Vial:1:F.6  
Description:MeOH/0.1% HCOOH in H2O 90:10

Sample Name:Q-T-3  
Date:09-Apr-2021

UserName:Fupeng Wu  
Time:15:26:23

Page 2

Sample Report:

(Time: 0.35) Combine (30:34-82:86) — Dead time test passed

1:TOF MS ES+  
4.5e+008

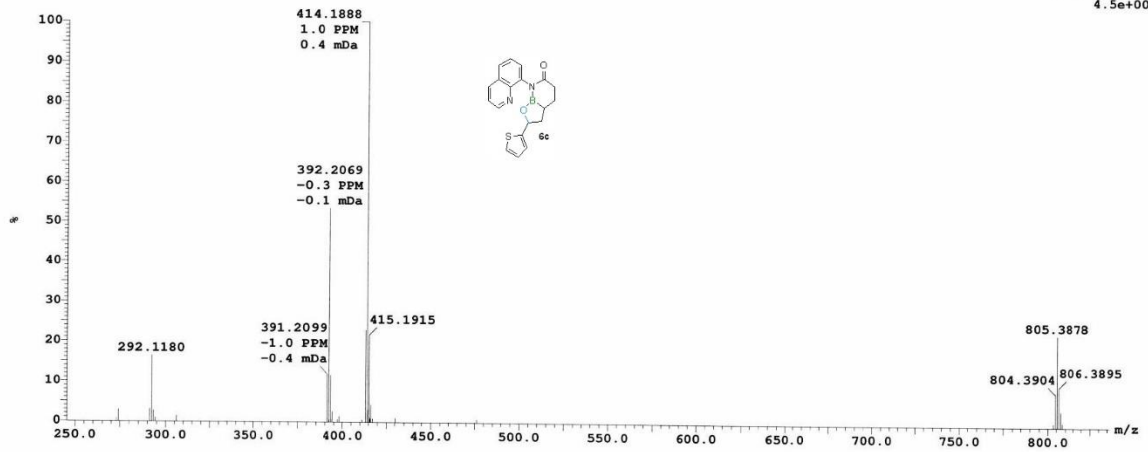



210322.f335.10.fid — Fupeng Wu / Q-T-3 — PROTON CDCl3 {C:\Bruker\TopSpin3.6.2} 2103 35 — 300.20MHz

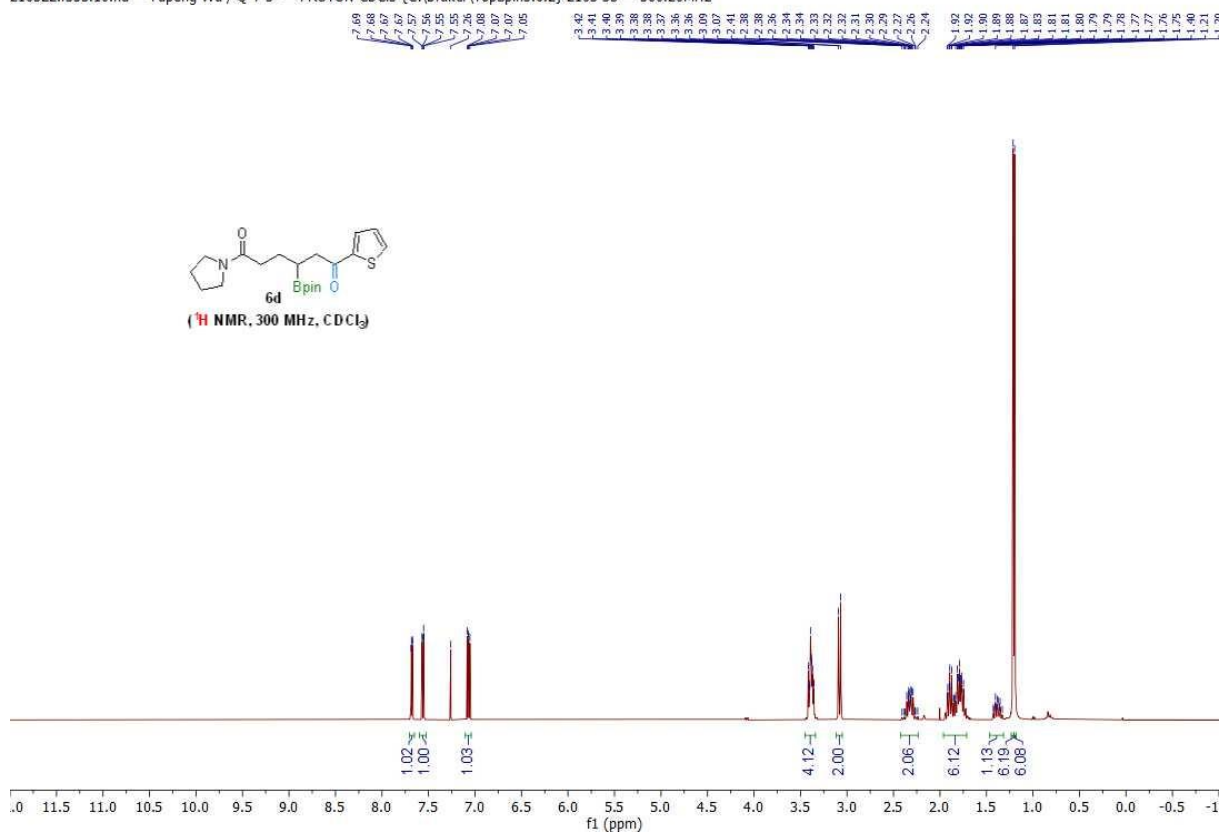

210322.f335.11.fid — Fupeng Wu / Q-T-3 — C13CPD CDCl3 {C:\Bruker\TopSpin3.6.2} 2103 35 — 75.49MHz

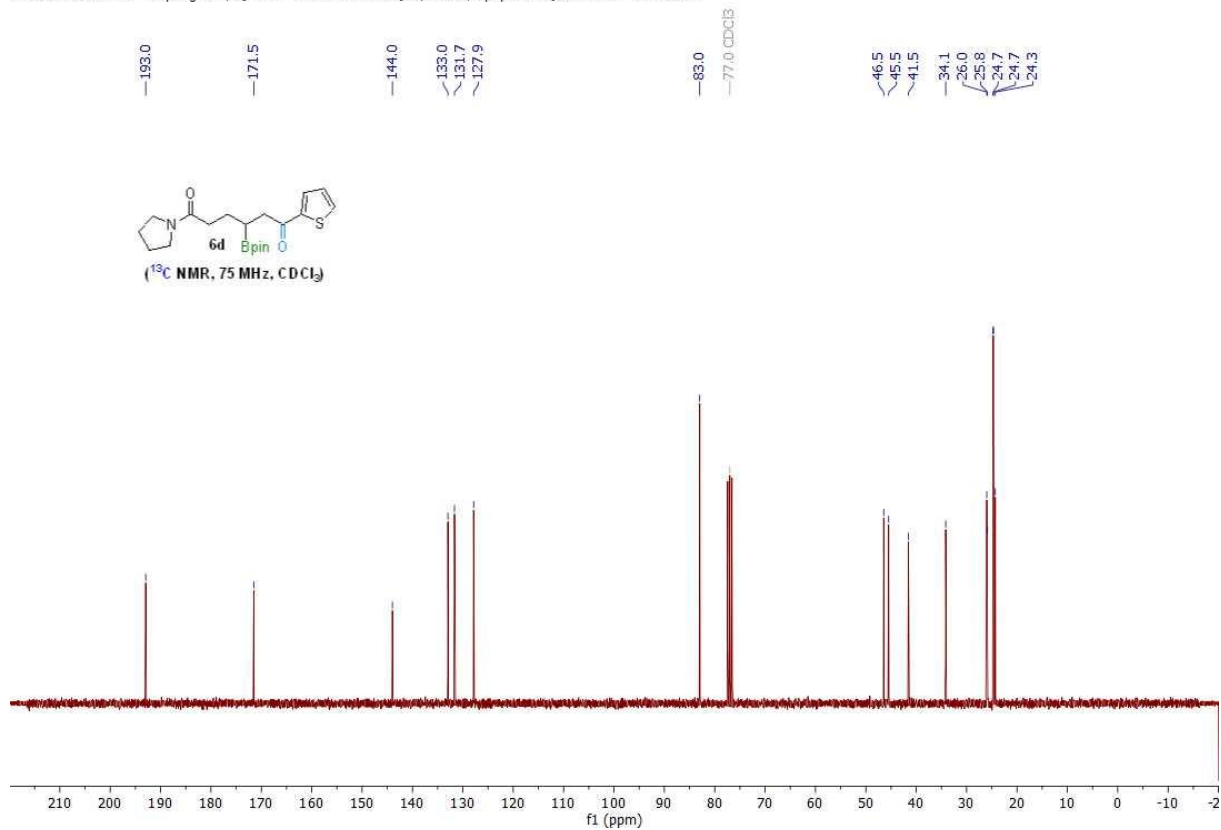

Sample Report:

(Time: 0.33) Combine (28:32-80:84) - Dead time test passed

1: TOF MS ES+  
1.1e+008

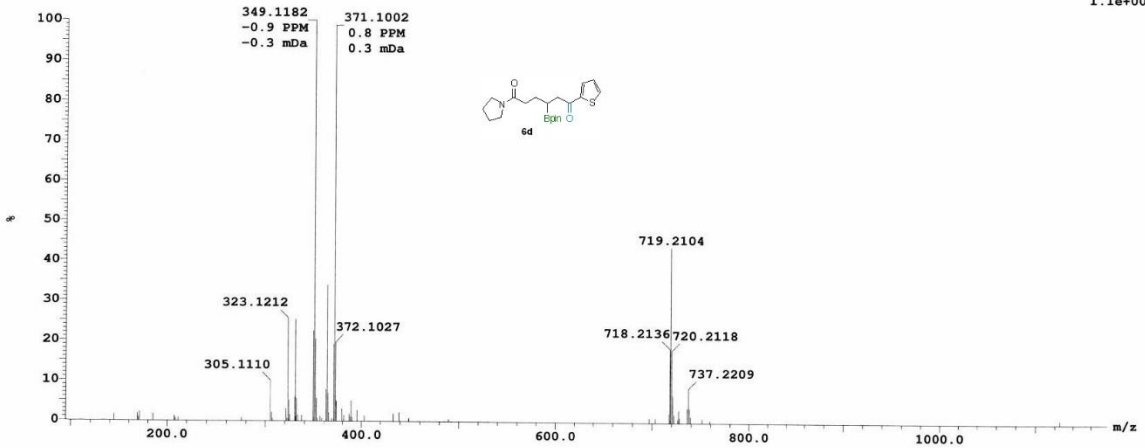

210401.f324.10.fid — Fupeng Wu Q-D — PROTON CDCl3 {C:\Bruker\TopSpin3.6.2} 2104 24 — 300.20MHZ

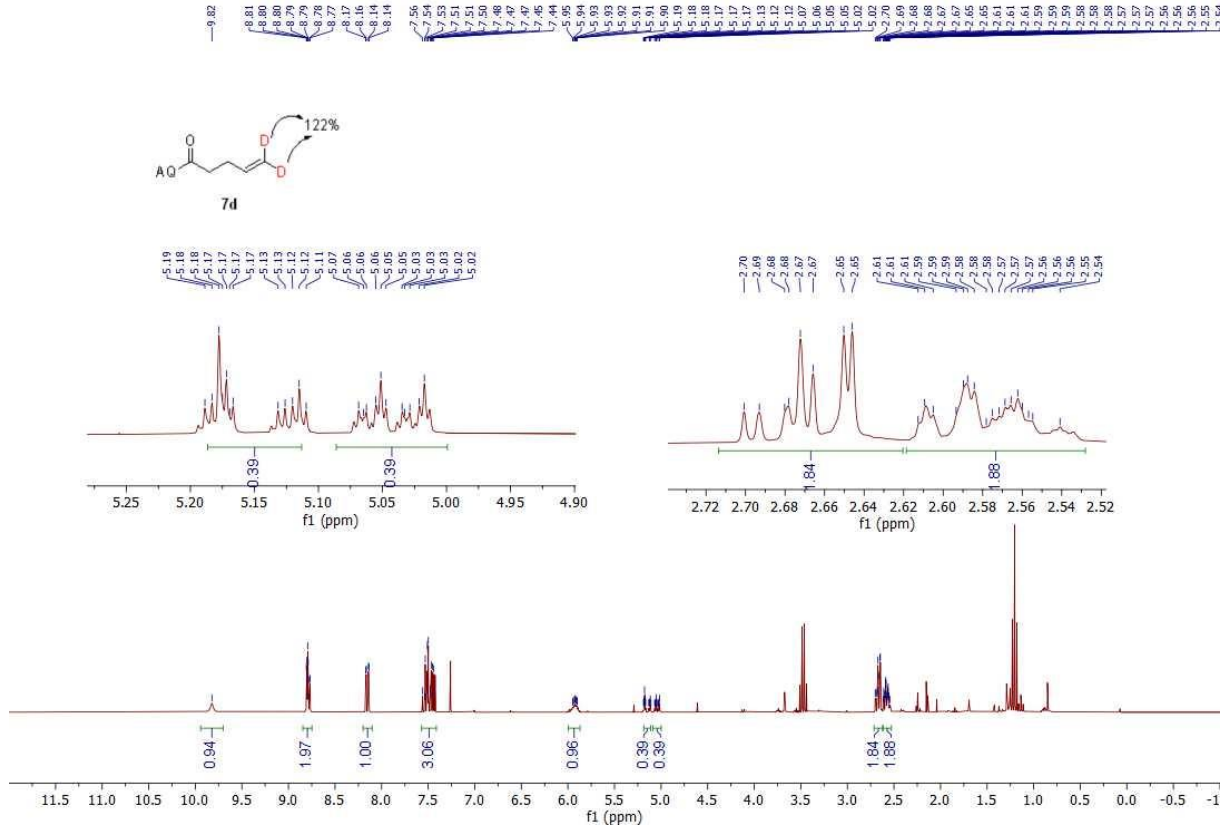

210406.f309.10.fid — Fupeng Wu Q-50 — PROTON CDCl3 {C:\Bruker\TopSpin3.6.2} 2104 9 — 300.20MHz

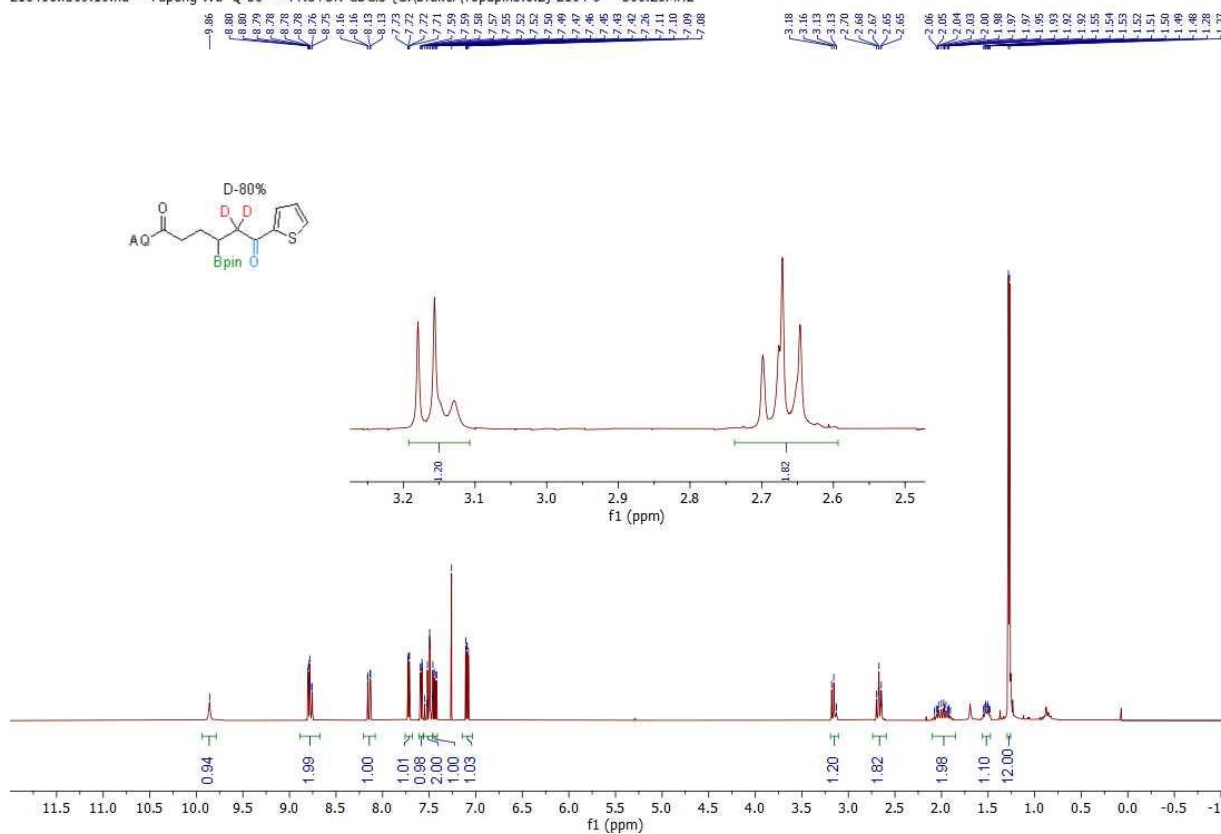

210406.f309.11.fid — Fupeng Wu Q-50 — C13CPD CDCl3 {C:\Bruker\TopSpin3.6.2} 2104 9 — 75.49MHz

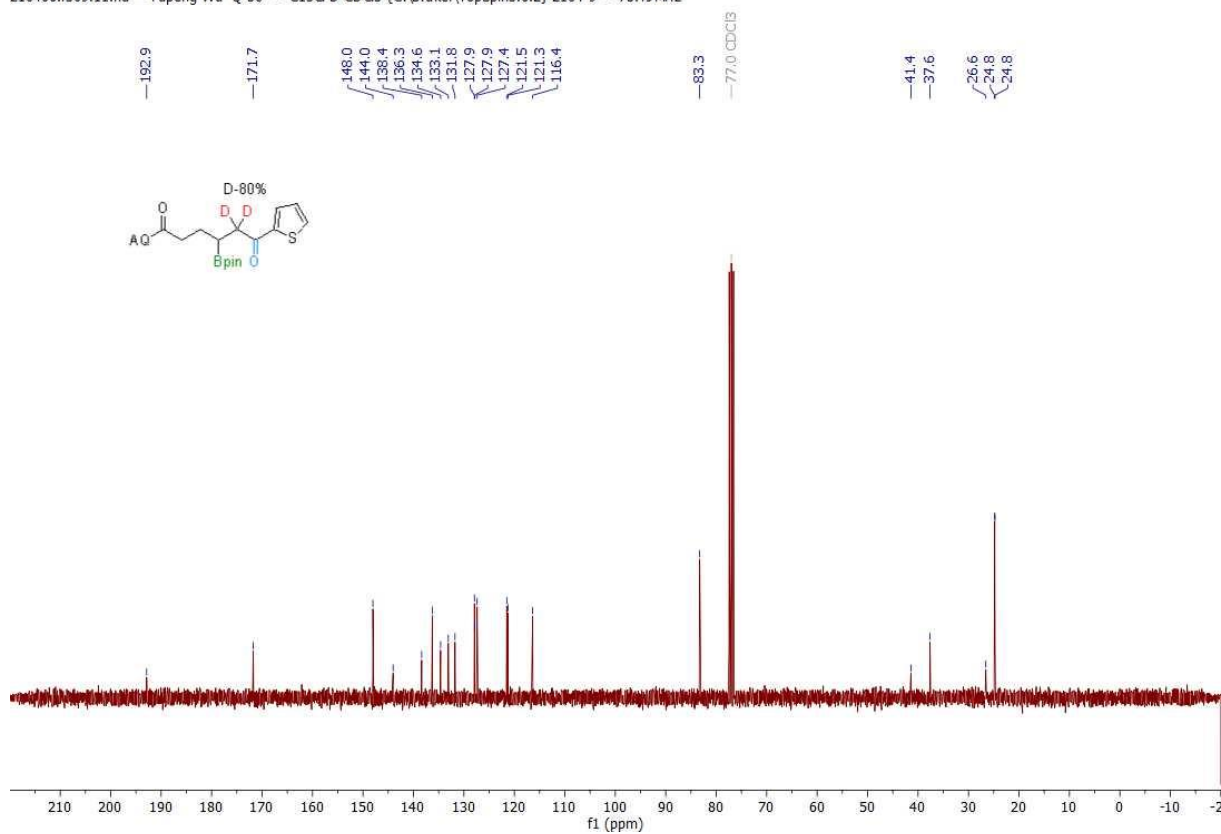

Supplement: d1sc02785a1.pdf [file d1sc02785a1.pdf]
